# Supplementary material for: Regioselective switching approach for the synthesis of α and δ carboline derivatives
Source: Royal Society of Chemistry journal article supplement (doi:10.1039/c6cc09468f), 2017-01-01
Supplement: c6cc09468f1.pdf [file c6cc09468f1.pdf]

## Supporting information

### Regioselective Switching Approach for the Synthesis of $\alpha$ and $\delta$ Carboline Derivatives

Tang-Hao Yang, Chun-Wei Kuo, Veerababurao Kavala, Ashok Konala, Chia-Yu Huang,  
Ching-Fa Yao <sup>\*[a]</sup>

#### Table of content

| Entry | content                                                             | page no |
|-------|---------------------------------------------------------------------|---------|
| 1.    | Optimization studies of $\delta$ -carboline and $\alpha$ -carboline | 2-4     |
| 2.    | General procedure for indolyloxime ester <b>1a-1u</b>               | 5-14    |
| 3.    | General procedure for $\delta$ -carboline <b>3a-3u</b>              | 14-21   |
| 4.    | General procedure for $\alpha$ -carboline <b>2a-2u</b>              | 21-28   |
| 5.    | Synthesis of intermediate <b>4</b>                                  | 29      |
| 6.    | Control experiment of $\alpha$ -carboline                           | 30      |
| 7.    | X-ray data for carboline <b>2r/3g</b> and intermediate <b>4</b>     | 31-33   |

**Table S1: Optimization studies of  $\delta$ -carboline on acid catalyst and solvent.**

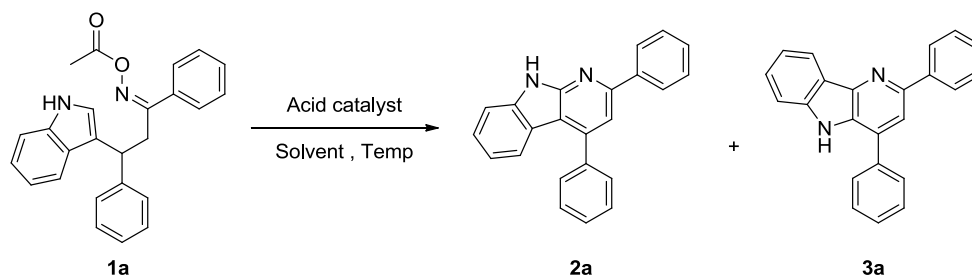

| Entry <sup>a</sup> | Acid catalyst                | Solvent                         | Tmp. (°C) | Time (min) | Yield <b>2a</b> (%) <sup>b</sup> | Yield <b>3a</b> (%) <sup>b</sup> |
|--------------------|------------------------------|---------------------------------|-----------|------------|----------------------------------|----------------------------------|
| 1                  | FeCl <sub>3</sub> 20 mol%    | CH <sub>2</sub> Cl <sub>2</sub> | r.t.      | 25         | 29                               | 36                               |
| 2                  | ZrCl <sub>4</sub> 1eq        | CH <sub>2</sub> Cl <sub>2</sub> | r.t.      | overnight  | 19                               | 21                               |
| 3                  | I <sub>2</sub> 20 mol%       | CH <sub>2</sub> Cl <sub>2</sub> | r.t.      | 60         | 24                               | 38                               |
| 4                  | TFA 20 mol%                  | CH <sub>2</sub> Cl <sub>2</sub> | r.t.      | 30         | 24                               | 26                               |
| 5                  | Sc(OTf) <sub>3</sub> 10 mol% | CH <sub>2</sub> Cl <sub>2</sub> | r.t.      | overnight  | 15                               | 8                                |
| 6                  | FeCl <sub>3</sub> 20 mol%    | 1,2-DCE                         | 80        | 15         | 34                               | 29                               |
| 7                  | InCl <sub>3</sub> 20 mol%    | 1,2-DCE                         | 60        | 30         | 21                               | 19                               |
| 8                  | I <sub>2</sub> 20 mol%       | 1,2-DCE                         | 80        | 25         | 35                               | 41                               |
| 9                  | I <sub>2</sub> 20 mol%       | CH <sub>3</sub> CN              | 60        | 120        | 5                                | 42                               |
| 10                 | I <sub>2</sub> 20 mol%       | CH <sub>3</sub> CN              | 80        | 120        | <i>n.d.</i>                      |                                  |
| 11                 | I <sub>2</sub> 20 mol%       | 1,2-DME                         | 60        | 15         | 10                               | 50                               |
| <b>12</b>          | <b>I<sub>2</sub> 20 mol%</b> | <b>1,2-DME</b>                  | <b>80</b> | <b>15</b>  | <b>9</b>                         | <b>52</b>                        |
| 13                 | I <sub>2</sub> 20 mol%       | EtOH                            | 60        | 30         | 6                                | 41                               |
| 14                 | I <sub>2</sub> 20 mol%       | PEG-400                         | 80        | overnight  |                                  | N.R.                             |
| 15                 | I <sub>2</sub> 20 mol%       | DMSO                            | 80        | overnight  |                                  | N.R.                             |
| 16                 | NbCl <sub>5</sub> 20 mol%    | CH <sub>3</sub> CN              | 60        | 60         | 18                               | 36                               |
| 17                 | NbCl <sub>5</sub> 20 mol%    | 1,2-DME                         | 60        | 60         | 19                               | 19                               |
| 18                 | NbCl <sub>5</sub> 20 mol%    | DMSO                            | 80        | overnight  |                                  | N.R.                             |

<sup>a</sup>All of reactions were carried out with 1 mmol **1a**, 2 mL solvent and acid catalyst.

<sup>b</sup>All of yields were determined from crude <sup>1</sup>H NMR spectrum with dibromomethane as internal standard.

**Table S2: Optimization studies of  $\delta$ -carboline on I<sub>2</sub> and solvent**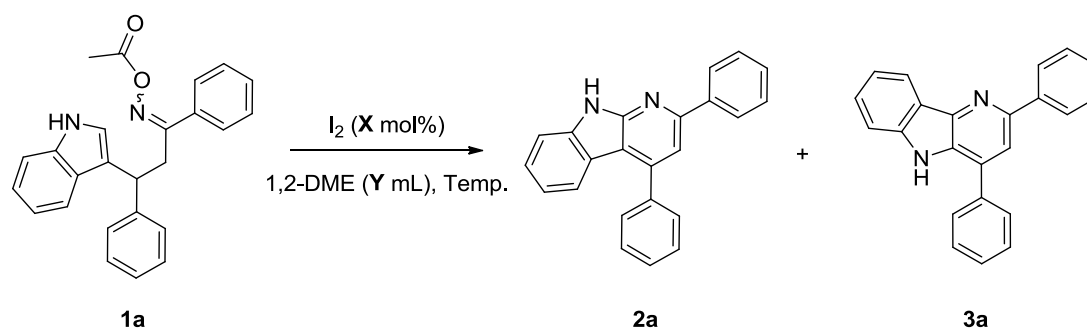

| Entry <sup>a</sup> | X (mol%)  | Y (mL)   | Temp. (°C) | Time (min) | Yield <b>2a</b> (%) <sup>b</sup> | Yield <b>3a</b> (%) <sup>b</sup> |
|--------------------|-----------|----------|------------|------------|----------------------------------|----------------------------------|
| 1                  | 20        | 2        | 60         | 15         | 10                               | 50                               |
| 2                  | 20        | 2        | 80         | 15         | 9                                | 52                               |
| 3                  | 30        | 2        | 80         | 15         | 8                                | 57                               |
| 4                  | 40        | 2        | 80         | 15         | 9                                | 60                               |
| 5                  | 50        | 2        | 80         | 60         | 3                                | 32                               |
| 6                  | 40        | 5        | 80         | 15         | 10                               | 60                               |
| 7                  | 40        | 2        | 100        | 15         | 10                               | 60                               |
| <b>8</b>           | <b>40</b> | <b>5</b> | <b>100</b> | <b>15</b>  | <b>10</b>                        | <b>70</b>                        |
| 9                  | 40        | 1        | 100        | 15         | 10                               | 60                               |
| 10                 | 40        | 10       | 100        | 20         | 11                               | 57                               |

<sup>a</sup>All of reaction were carried out with 1mmol **1a**.

<sup>b</sup>All of yields were determined from crude <sup>1</sup>H NMR spectrum with dibromomethane as internal standard.

**Table S3: Optimization studies of  $\alpha$ -carboline**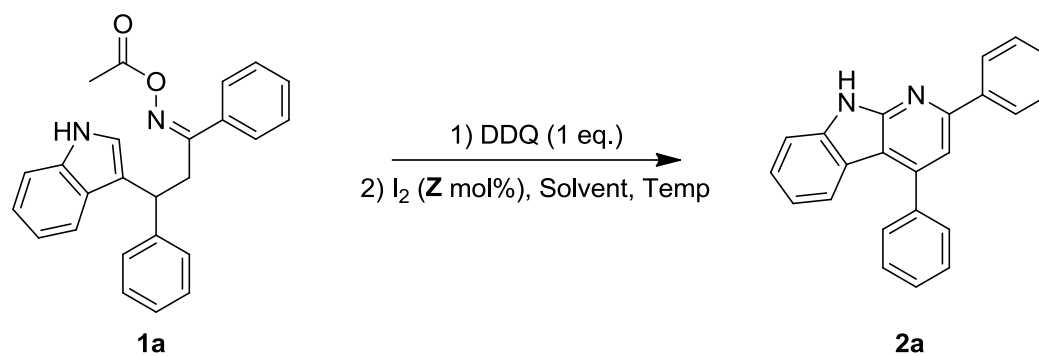

| Entry <sup>a</sup> | Z         | Solvent                                | Temp (°C) | Time (h) | Yield <b>2a</b> (%) <sup>b</sup> |
|--------------------|-----------|----------------------------------------|-----------|----------|----------------------------------|
| 1                  | 20        | CH <sub>2</sub> Cl <sub>2</sub> (2 mL) | r.t.      | 4        | 53                               |
| 2                  | 20        | 1,2-DCE (2 mL)                         | 80        | 0.5      | 47                               |
| 3                  | 20        | 1,2-DCE (5 mL)                         | 80        | 0.5      | 63                               |
| 4                  | 40        | 1,2-DCE (5 mL)                         | 80        | 0.5      | 60                               |
| 5                  | 20        | 1,2-DCE (10 mL)                        | 80        | 1        | 70                               |
| <b>6</b>           | <b>20</b> | <b>1,2-DCE (10 mL)</b>                 | <b>60</b> | <b>1</b> | <b>70</b>                        |
| 7                  | 20        | 1,2-DME (5 mL)                         | 80        | 1        | 56                               |

<sup>a</sup>The reactions were carried out with 1 mmol **1a**, 1 eq. DDQ and solvent, followed by addition of iodine as acid catalyst.

<sup>b</sup>All of yields were determined from crude <sup>1</sup>H NMR spectrum with dibromomethane as internal standard.

## General information

Reagents and solvents were purchased from various commercial sources and were used directly without any further purification, unless otherwise stated. Column chromatography was performed with 63–200 mesh silica gel.  $^1\text{H}$  and  $^{13}\text{C}$  NMR spectra were recorded at 400 and 100 MHz, or 500 and 125 MHz, respectively. Chemical shifts are reported in parts per million (d) using TMS and chloroform as internal standards and coupling constants are expressed in Hertz. Melting points were recorded using an electro thermal capillary melting point apparatus and are uncorrected. HRMS spectra were recorded using ESI-TOF or EI+ mode. The starting material indolyl carbonyl compound derivatives **I** were synthesized from various indole and chalcone derivatives followed by reported literatures.<sup>1</sup>

## Preparation of indolyloxime esters 1a-1u

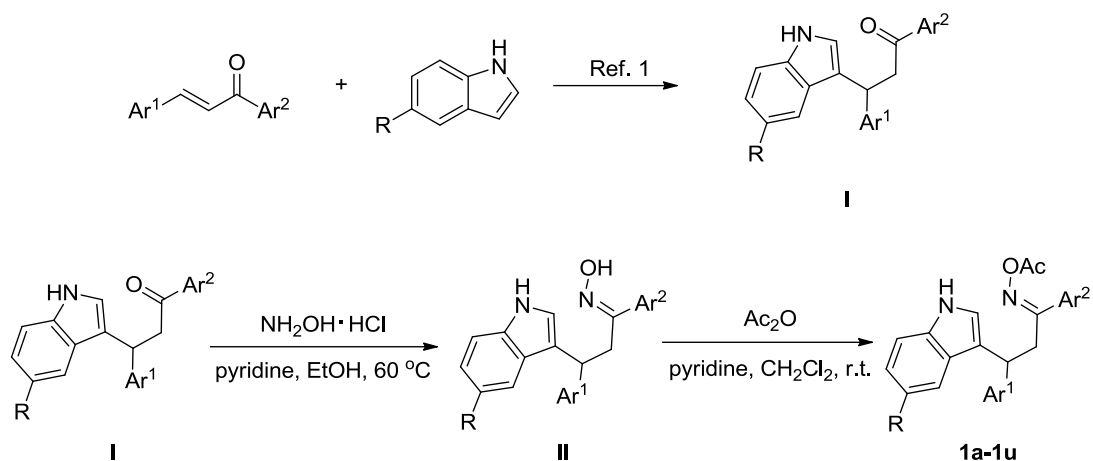

## General procedures:

A suspension of indolyl carbonyl compound **I** (5 mmol), hydroxylamine hydrochloride (0.52g, 7.5 mmol) in pyridine (1.25 mL) and EtOH (10 mL) was heated to 60 °C for 1 h. After completion of the reaction, the mixture was concentrated under reduced pressure. The residue was diluted with ethyl acetate (50 mL), and the organic layer was washed with aq. 3M HCl (20 mL) for two times, and then aq. NaHCO<sub>3</sub> (10 mL) for two times. The organic layer was dried over MgSO<sub>4</sub> and concentrated under reduced pressure to afford the crude indolyloxime **II**. Further, acetic anhydride (0.56g, 6 mmol) was added slowly to a solution of indolyloxime **II** (crude) in pyridine (2.5 mL) and CH<sub>2</sub>Cl<sub>2</sub>

<sup>1</sup> F. Portela-Cubillo, B. A. Surgenor, R. A. Aitken, J.C. Walton *J. Org. Chem.* **2008**, *73*, 8125

(2.5 mL). The reaction mixture was stirred at ambient temperature for 3 h. After completion of the reaction, the mixture was diluted with ethyl acetate (50 mL), and the organic layer was washed with with aq. 3M HCl (20 mL) for three times, and then aq. NaHCO<sub>3</sub> (20 mL) for three times. The organic layer was dried over MgSO<sub>4</sub> and concentrated under reduced pressure. the residue was purified by column chromatography on silica gel (eluent: hexane/ethyl acetate = 5:1) to afford the pure indolyloxime ester **1a-1u**.

**(Z)-3-(1H-indol-3-yl)-1,3-diphenylpropan-1-one O-acetyl oxime (1a)**

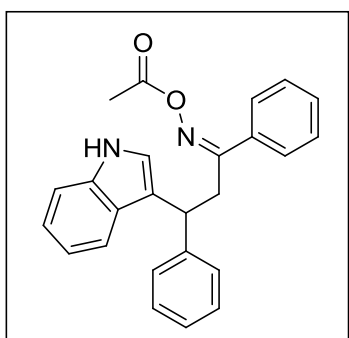

Brown solid, 76% yield; mp 117-118 °C; <sup>1</sup>H NMR (400 MHz, CDCl<sub>3</sub>) δ 8.10 (brs, 1H), 7.54-7.52 (m, 2H), 7.42-7.38 (m, 1H), 7.35-7.29 (m, 3H), 7.25-7.09 (m, 7H), 7.05 (d, *J* = 2.1 Hz, 1H), 6.97-6.93 (m, 1H), 4.44 (t, *J* = 7.8 Hz, 1H), 3.73 (dd, *J* = 12.9, 6.9 Hz, 1H), 3.64 (dd, *J* = 12.9, 8.7 Hz, 1H), 1.95 (s, 3H); <sup>13</sup>C NMR (100 MHz, CDCl<sub>3</sub>) δ 169.0, 165.2, 143.1, 136.8, 134.3, 130.5, 128.8, 128.5, 128.0, 127.7, 126.8, 126.7, 122.3, 121.6, 119.7, 119.6, 118.4, 111.4, 40.6, 34.7, 19.7; HRMS (EI) *m/z* calcd. For C<sub>25</sub>H<sub>22</sub>N<sub>2</sub>O<sub>2</sub> (M<sup>+</sup>) 382.1681, found 382.1689.

**(Z)-3-(2-fluorophenyl)-3-(1H-indol-3-yl)-1-phenylpropan-1-one O-acetyl oxime (1b)**

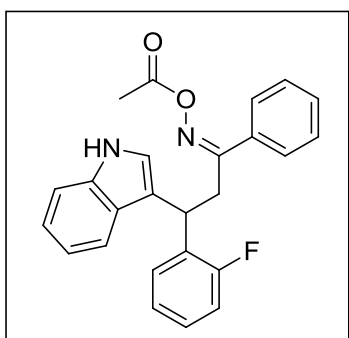

Pink solid, 99% yield; mp 124-126 °C; <sup>1</sup>H NMR (400 MHz, CDCl<sub>3</sub>) δ 8.20 (brs, 1H), 7.55 (d, *J* = 7.2 Hz, 2H), 7.42-7.38 (m, 1H), 7.39-7.35 (m, 4H), 7.21-7.17 (m, 1H), 7.15-7.09 (m, 3H), 7.00-6.93 (m, 3H), 4.83 (t, *J* = 7.86 Hz, 1H), 3.78-3.67 (m, 2H), 2.03 (s, 3H); <sup>13</sup>C NMR (100 MHz, CDCl<sub>3</sub>) δ 169.0, 165.3, 160.9 (d, *J*<sub>C-F</sub> = 245.8 Hz), 136.6, 134.1, 130.1 (d, *J*<sub>C-F</sub> = 13.9 Hz), 129.9 (d, *J*<sub>C-F</sub> = 4.3 Hz), 129.6, 128.5 (d, *J*<sub>C-F</sub> = 8.4 Hz), 128.3, 127.5, 126.5, 124.2 (d, *J*<sub>C-F</sub> = 3.3 Hz), 122.3, 121.9, 119.6, 119.2, 116.9, 115.7 (d, *J*<sub>C-F</sub> = 22.4 Hz), 111.4, 34.0, 33.7, 19.8; HRMS (ESI) *m/z* calcd. For C<sub>25</sub>H<sub>21</sub>FN<sub>2</sub>O<sub>2</sub>Na (M+23) 423.1485, found 423.1483.

**(Z)-3-(2-chlorophenyl)-3-(1H-indol-3-yl)-1-phenylpropan-1-one O-acetyl oxime (1c)**

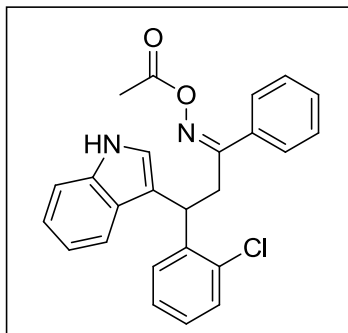

Brown solid, 99% yield; mp 137-139 °C; <sup>1</sup>H NMR (400 MHz, CDCl<sub>3</sub>) δ 8.35 (brs, 1H), 7.53 (d, *J* = 7.6 Hz, 2H), 7.37 (t, *J* = 7.28 Hz, 1H), 7.31-7.28 (m, 6H), 7.13-7.05 (m, 4H), 6.97 (t, *J* = 7.5 Hz, 1H), 5.12 (t, *J* = 7.9 Hz, 1H), 3.77 (dd, *J* = 13.4, 7.6 Hz, 1H), 3.58 (dd, *J* = 13.4, 8.3 Hz, 1H), 2.14 (s, 3H); <sup>13</sup>C NMR (100 MHz, CDCl<sub>3</sub>) δ 169.1, 165.2, 140.7, 136.5, 133.9, 133.5, 130.3, 129.5, 128.5, 127.9, 127.5, 126.9, 126.6, 122.2, 121.8, 119.4, 119.2, 117.2, 111.3, 36.4, 33.9, 19.8; HRMS (EI) *m/z* calcd. For C<sub>25</sub>H<sub>21</sub>ClN<sub>2</sub>O<sub>2</sub> (M<sup>+</sup>) 416.1292, found 416.1292.

**(Z)-3-(2-bromophenyl)-3-(1H-indol-3-yl)-1-phenylpropan-1-one O-acetyl oxime (1d)**

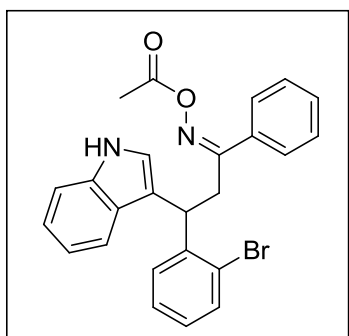

Brown solid, 70% yield; mp 138-139 °C; <sup>1</sup>H NMR (400 MHz, CDCl<sub>3</sub>) δ 8.24 (brs, 1H), 7.53-7.47 (m, 3H), 7.39-7.27 (m, 6H), 7.14-7.07 (m, 3H), 7.00-6.95 (m, 2H), 5.10 (t, *J* = 7.9 Hz, 1H), 3.77 (dd, *J* = 13.5, 7.7 Hz, 1H), 3.50 (dd, *J* = 13.5, 8.2 Hz, 1H), 2.15 (s, 3H); <sup>13</sup>C NMR (100 MHz, CDCl<sub>3</sub>) δ 169.3, 165.2, 142.5, 136.6, 134.1, 133.0, 130.4, 129.8, 128.6, 128.3, 127.7, 127.6, 126.7, 124.4, 122.4, 121.8, 119.7, 119.5, 117.7, 111.4, 39.2, 34.2, 20.0; HRMS (ESI) *m/z* calcd. For C<sub>25</sub>H<sub>21</sub>BrN<sub>2</sub>O<sub>2</sub>Na (M+23) 483.0684, found 483.0694.

**(Z)-3-(1H-indol-3-yl)-3-(naphthalen-1-yl)-1-phenylpropan-1-one O-acetyl oxime (1e)**

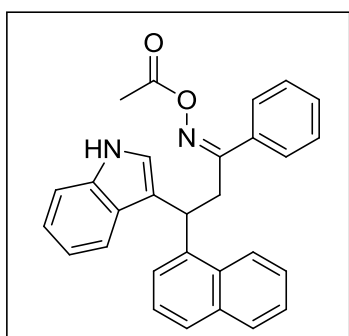

White solid, 66% yield; mp 141-143 °C, two isomers; <sup>1</sup>H NMR (400 MHz, CDCl<sub>3</sub>) δ 8.08 (brs, 1H), 8.03 (d, *J* = 8.5 Hz, 1H), 7.82 (d, *J* = 8.0 Hz, 1H), 7.71 (d, *J* = 8.2 Hz, 1H), 7.53 (d, *J* = 7.1 Hz, 1H), 7.46-7.26 (m, 9H), 7.09 (t, *J* = 7.7 Hz, 1H), 7.01 (d, *J* = 1.4 Hz, 1H), 6.91 (t, *J* = 7.5 Hz, 1H), 5.30 (1H, t, *J* = 7.7 Hz, CH), 3.96 (dd, *J* = 13.1, 8.1 Hz, 1H), 3.73 (dd, *J* = 13.1, 7.4 Hz, 1H), 1.91 (s, 3H); <sup>13</sup>C NMR (100 MHz,

CDCl<sub>3</sub>) δ 169.1, 165.6, 139.1, 136.7, 134.4, 134.2, 131.8, 130.4, 129.0, 128.7, 127.7, 127.6, 126.8, 126.1, 125.6, 125.5, 125.2, 123.5, 122.3, 122.2, 119.5, 118.5, 111.4, 36.1, 34.9, 19.6; HRMS (ESI) m/z calcd. For C<sub>29</sub>H<sub>24</sub>N<sub>2</sub>O<sub>2</sub>Na (M+23) 455.1736, found 455.1746.

**(Z)-3-(1H-indol-3-yl)-3-(2-nitrophenyl)-1-phenylpropan-1-one O-acetyl oxime (1f)**

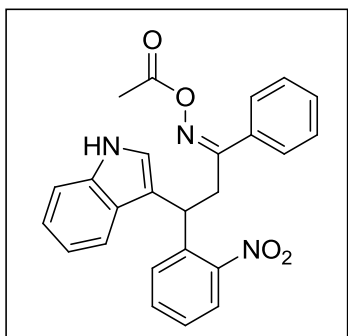

Yellow solid, 74% yield; mp 85-86 °C; <sup>1</sup>H NMR (400 MHz, CDCl<sub>3</sub>) δ 8.18 (brs, 1H), 7.68 (d, *J* = 8.0 Hz, 1H), 7.48-7.45 (m, 3H), 7.39-7.34 (m, 2H), 7.30-7.22 (m, 5H), 7.13-7.09 (m, 2H), 6.94 (t, *J* = 7.5 Hz, 1H), 5.29 (t, *J* = 7.9 Hz, 1H), 3.83 (dd, *J* = 13.4, 8.1 Hz, 1H), 3.61 (dd, *J* = 13.4, 8.0 Hz, 1H), 2.12 (s, 3H); <sup>13</sup>C NMR (100 MHz, CDCl<sub>3</sub>) δ 169.2, 164.6, 150.0, 137.6, 136.6, 133.8, 132.6, 130.6, 130.4, 128.7, 127.8, 127.6, 126.5, 124.4, 122.7, 122.3, 119.9, 119.3, 116.5, 111.4, 34.9, 34.4, 19.9; HRMS (ESI) m/z calcd. For C<sub>25</sub>H<sub>21</sub>N<sub>3</sub>O<sub>4</sub>Na (M+23) 450.1430, found 450.1442.

**(Z)-3-(1H-indol-3-yl)-3-(3-methoxyphenyl)-1-phenylpropan-1-one O-acetyl oxime (1g)**

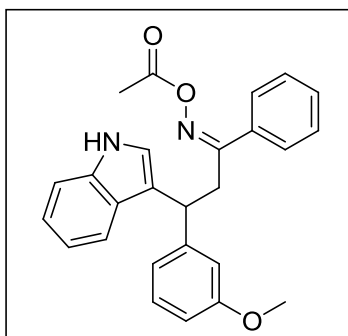

Red oil, 90% yield; <sup>1</sup>H NMR (400 MHz, CDCl<sub>3</sub>) δ 8.06 (brs, 1H), 7.55-7.53 (m, 2H), 7.42-7.28 (m, 5H), 7.15-7.11 (m, 2H), 7.07 (d, *J* = 1.7 Hz, 1H), 6.96 (d, *J* = 7.5 Hz, 1H), 6.82 (d, *J* = 7.7 Hz, 1H), 6.76 (s, 1H), 6.69 (dd, *J* = 8.2, 1.8 Hz, 1H), 4.42 (t, *J* = 7.8 Hz, 1H), 3.73 (dd, *J* = 12.9, 7.0 Hz, 1H), 3.7 (s, 3H), 3.64 (dd, *J* = 13.0, 8.7 Hz, 1H), 1.98 (s, 3H); <sup>13</sup>C NMR (100 MHz, CDCl<sub>3</sub>) δ 169.0, 165.3, 159.7, 144.7, 136.8, 134.3, 130.5, 129.4, 128.7, 126.7, 122.3, 121.7, 120.5, 119.6, 119.5, 118.1, 114.2, 111.8, 111.4, 55.3, 40.6, 34.6, 19.7; HRMS (ESI) m/z calcd. For C<sub>26</sub>H<sub>24</sub>N<sub>2</sub>O<sub>3</sub>Na (M+23) 435.1679, found 435.1668.



**(Z)-3-(benzo[d][1,3]dioxol-5-yl)-3-(1H-indol-3-yl)-1-phenylpropan-1-one O-acetyl oxime (1h)**

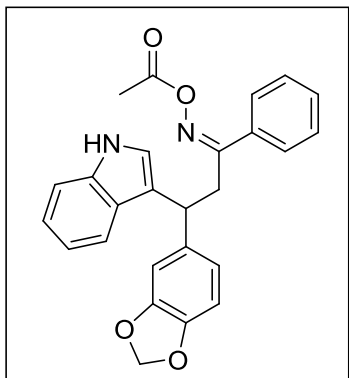

White solid, 76% yield; mp 140-141 °C, <sup>1</sup>H NMR (400 MHz, CDCl<sub>3</sub>) δ 8.17 (brs, 1H,), 7.54-7.97 (m, 2H,), 7.43-7.39 (m, 1H), 7.36-7.27 (m, 4H), 7.15-7.11 (m, 1H), 7.06 (d, *J* = 2.2 Hz, 1H), 6.99-6.95 (m, 1H), 6.68-6.63 (m, 3H), 5.85 (dd, *J* = 4.5, 1.3 Hz, 2H), 4.38 (dd, *J* = 8.8, 6.8 Hz, 1H), 3.68 (dd, *J* = 12.9, 6.7 Hz, 1H), 3.61 (dd, *J* = 12.9, 9.1 Hz, 1H), 2.04 (s, 3H); <sup>13</sup>C NMR (100 MHz, CDCl<sub>3</sub>) δ 168.9, 165.3, 147.7, 146.3, 137.0, 136.8, 134.2, 130.5, 128.7, 127.7, 126.6, 122.2, 121.4, 121.0, 119.4, 118.2, 111.5, 108.4, 107.9, 100.9, 40.4, 34.8, 19.7; 119.52, HRMS (EI) *m/z* calcd. For C<sub>26</sub>H<sub>22</sub>N<sub>2</sub>O<sub>4</sub> (M<sup>+</sup>) 426.1580, found 426.1575.

**(Z)-3-(1H-indol-3-yl)-1-phenyl-3-(thiophen-2-yl)propan-1-one O-acetyl oxime (1i)**

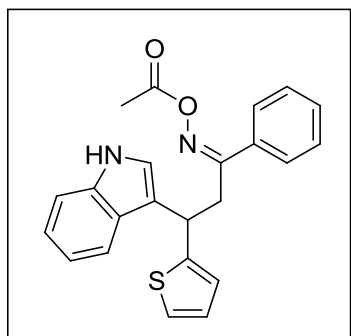

Pink solid, 60% yield; two isomers 6:1; mp 146-147 °C; <sup>1</sup>H NMR (400 MHz, CDCl<sub>3</sub>) δ 8.20 (brs, 1H), 7.57 (d, *J* = 7.2 Hz, 2H), 7.43-7.30 (m, 6H), 7.16-7.09 (m, 3H), 7.03-6.99 (m, 2H), 6.90-6.86 (m, 2H), 4.71 (t, *J* = 7.7 Hz, 1H), 3.86 (dd, *J* = 13.0, 8.2 Hz, 1H), 3.68 (dd, *J* = 12.9, 7.3 Hz, 1H), 1.91 (s, 3H); <sup>13</sup>C NMR (100 MHz, CDCl<sub>3</sub>) δ 168.8, 164.8, 147.8, 136.8, 134.0, 130.6, 128.8, 127.6, 126.7, 126.4, 124.6, 124.1, 122.3, 122.0, 119.7, 119.6, 117.5, 111.6, 36.3, 35.6, 19.5; HRMS (ESI) *m/z* calcd. For C<sub>23</sub>H<sub>20</sub>N<sub>2</sub>O<sub>2</sub>NaS (M+23) 411.1143, found 411.1143.

**(Z)-1-(4-chlorophenyl)-3-(1H-indol-3-yl)-3-phenylpropan-1-one O-acetyl oxime (1j)**

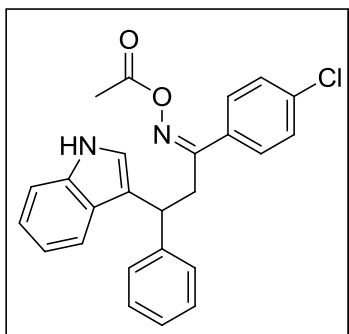

White solid, 66% yield; mp 191-192 °C; <sup>1</sup>H NMR (400 MHz, CDCl<sub>3</sub>) δ 8.22 (brs, 1H), 7.45 (d, *J* = 8.5 Hz, 2H), 7.31-7.21 (m, 8H), 7.19-7.11 (m, 2H), 7.03 (s, 1H), 6.97 (1H, t, *J* = 7.5 Hz, CH), 4.46 (t, *J* = 7.8 Hz, 1H), 3.71 (dd, *J* = 13.0, 6.9 Hz, 1H), 3.62 (dd, *J* = 12.9, 8.8 Hz, 1H), 2.00 (s, 3H); <sup>13</sup>C NMR

(100 MHz, CDCl<sub>3</sub>)  $\delta$  168.8, 164.3, 142.9, 136.8, 136.6, 132.7, 128.9, 128.5, 127.9, 126.9, 126.6, 122.4, 121.6, 119.6, 118.1, 118.1, 111.5, 40.6, 34.7, 19.6; HRMS (ESI) *m/z* calcd. For C<sub>25</sub>H<sub>21</sub>ClN<sub>2</sub>O<sub>2</sub>Na (M+23) 439.1189, found 439.1204.

**(Z)-1-(4-bromophenyl)-3-(1H-indol-3-yl)-3-phenylpropan-1-one O-acetyl oxime (1k)**

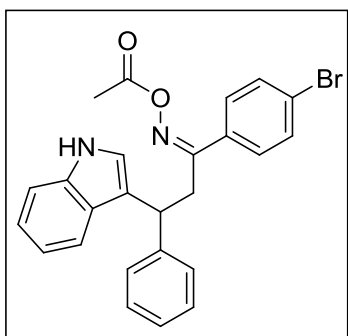

White solid, 82% yield; mp 175-176 °C; <sup>1</sup>H NMR (400 MHz, CDCl<sub>3</sub>)  $\delta$  8.18 (brs, 1H), 7.45 (d, *J* = 8.5 Hz, 2H), 7.31-7.25 (m, 4H), 7.19-7.17 (m, 6H), 7.03 (d, *J* = 1.6 Hz, 1H), 6.97 (t, *J* = 7.48 Hz, 1H), 4.46 (t, *J* = 7.8 Hz, 1H), 3.71 (dd, *J* = 12.9, 6.9 Hz, 1H), 3.62 (dd, *J* = 12.9, 8.8 Hz, 1H), 2.00 (s, 3H); <sup>13</sup>C NMR (100 MHz, CDCl<sub>3</sub>)  $\delta$  168.8, 164.3, 142.9, 136.8, 136.6, 132.7, 128.9, 128.5, 127.9, 126.9, 126.6, 122.4, 121.6, 119.6, 118.1, 118.1, 111.5, 40.6, 34.7, 19.6; HRMS (ESI) *m/z* calcd. For C<sub>25</sub>H<sub>21</sub>BrN<sub>2</sub>O<sub>2</sub>Na (M+23) 483.0684, found 483.0697.

**(Z)-3-(1H-indol-3-yl)-1-(4-nitrophenyl)-3-phenylpropan-1-one O-acetyl oxime (1l)**

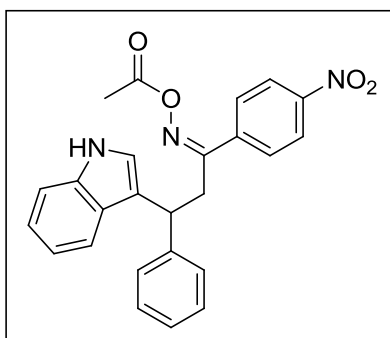

White solid, 50% yield; mp 113 -114 °C; <sup>1</sup>H NMR (400 MHz, CDCl<sub>3</sub>)  $\delta$  8.12 (brs, 1H), 8.09 (d, *J* = 8.7 Hz, 2H), 7.58 (d, *J* = 8.7 Hz, 2H), 7.31-7.11 (m, 8H), 7.05 (d, *J* = 1.4 Hz, 1H), 6.97 (t, *J* = 7.5 Hz, 1H), 4.49 (t, *J* = 7.9 Hz, 1H), 3.8 (dd, *J* = 13.0, 7.1 Hz, 1H), 3.65 (dd, *J* = 12.9, 8.8 Hz, 1H), 2.09 (s, 3H); <sup>13</sup>C NMR (100 MHz, CDCl<sub>3</sub>)  $\delta$  168.4, 163.8, 148.8, 142.6, 140.6, 136.8, 128.7, 128.6, 127.9, 127.1, 126.5, 123.7, 122.6, 121.6, 119.8, 119.6, 117.9, 111.5, 40.6, 35.1, 19.7; HRMS (ESI) *m/z* calcd. For C<sub>25</sub>H<sub>21</sub>N<sub>3</sub>O<sub>4</sub>Na (M+23) 450.1430, found 450.1442.

**(Z)-3-(1H-indol-3-yl)-1-(4-isopropylphenyl)-3-phenylpropan-1-one**

**O-acetyl oxime (1m)**

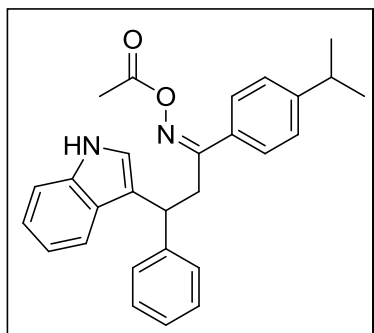

White solid, 65% yield; two isomers; mp 135-137 °C; <sup>1</sup>H NMR (400 MHz, CDCl<sub>3</sub>) δ 8.10 (brs, 1H), 7.31 (d, *J* = 8.4 Hz, 1H), 7.26-7.10 (m, 10H), 6.95 (t, *J* = 7.2 Hz, 1H), 4.46 (t, *J* = 7.7 Hz, 1H), 3.73 (dd, *J* = 12.9, 6.9 Hz, 1H), 3.65 (dd, *J* = 12.9, 8.7 Hz, 1H), 2.92 (sep, *J* = 6.9 Hz, 1H), 1.93 (s, 3H), 1.25 (d, *J* = 7.0 Hz, 6H); <sup>13</sup>C NMR (100 MHz,

CDCl<sub>3</sub>) δ 169.1, 165.0, 151.6, 143.2, 136.8, 131.7, 128.5, 128.0, 127.7, 126.9, 126.8, 122.3, 121.7, 119.8, 119.5, 118.5, 111.4, 40.7, 34.6, 34.2, 24.0, 24.0, 19.7; HRMS (ESI) *m/z* calcd. For C<sub>28</sub>H<sub>28</sub>N<sub>2</sub>O<sub>2</sub>Na (*M*+23) 447.2048, found 447.2048.

**(Z)-3-(1H-indol-3-yl)-1-(4-isobutylphenyl)-3-phenylpropan-1-one O-acetyl oxime (1n)**

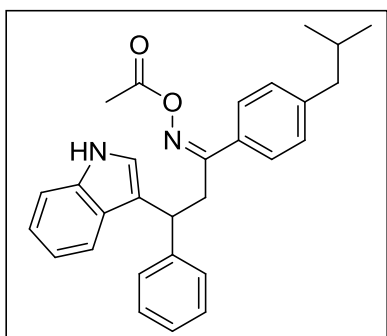

White solid, 66% yield; mp 119-120 °C; <sup>1</sup>H NMR (400 MHz, CDCl<sub>3</sub>) δ 8.33 (brs, 1H), 7.51 (d, *J* = 8.1 Hz, 2H), 7.31-7.12 (m, 10H), 7.06 (d, *J* = 2.2 Hz, 1H), 6.99 (t, *J* = 7.5 Hz, 1H), 4.51 (t, *J* = 7.7 Hz, 1H), 3.76 (dd, *J* = 12.9, 6.7 Hz, 1H), 3.68 (dd, *J* = 12.9, 8.9 Hz, 1H), 2.52 (d, *J* = 7.2 Hz, 2H), 1.99 (s, 3H), 1.9 (n, *J* = 6.74 Hz, 1H), 0.94

(d, *J* = 6.64 Hz, 6H); <sup>13</sup>C NMR (100 MHz, CDCl<sub>3</sub>) δ 169.1, 165.3, 144.5, 143.1, 136.8, 131.5, 129.5, 128.4, 127.9, 127.4, 126.7, 126.7, 122.1, 121.7, 119.6, 119.6, 119.3, 118.1, 111.4, 45.3, 40.7, 34.6, 30.3, 22.5, 19.6; HRMS (ESI) *m/z* calcd. For C<sub>29</sub>H<sub>30</sub>N<sub>2</sub>O<sub>2</sub>Na (*M*+23) 461.2205, found 461.2224.

**(Z)-1-(4-(tert-butyl)phenyl)-3-(1H-indol-3-yl)-3-phenylpropan-1-one**

**O-acetyl oxime (1o)**

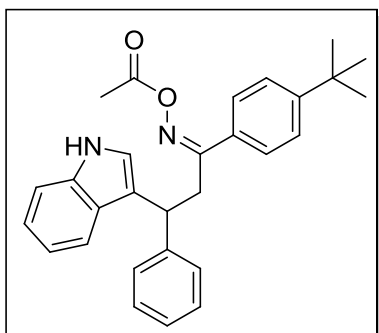

White solid, 70% yield; mp 110-112 °C; <sup>1</sup>H NMR (400 MHz, CDCl<sub>3</sub>) δ 8.15 (brs, 1H), 7.52-7.50 (m, 2H), 7.36 (d, *J* = 8.5 Hz, 2H), 7.3 (d, *J* = 8.2 Hz, 1H), 7.26-7.20 (m, 5H), 7.17-7.10 (m, 3H), 6.95 (t, *J* = 7.5 Hz, 1H), 4.47 (t, *J* = 7.7 Hz, 1H), 3.73 (dd, *J* = 12.9, 6.9 Hz, 1H), 3.65 (dd, *J* = 12.9, 8.6

Hz, 1H), 1.92 (s, 3H), 1.32 (s, 9H);  $^{13}\text{C}$  NMR (100 MHz,  $\text{CDCl}_3$ )  $\delta$  169.1, 165.0, 153.9, 143.2, 136.8, 131.2, 128.4, 128.0, 127.4, 126.8, 125.7, 122.3, 121.7, 119.8, 119.5, 118.4, 111.4, 40.7, 34.9, 34.6, 31.4, 19.7; HRMS (ESI)  $m/z$  calcd. For  $\text{C}_{29}\text{H}_{30}\text{N}_2\text{O}_2\text{Na}$  ( $M+23$ ) 461.2205, found 461.2208.

**(Z)-3-(1H-indol-3-yl)-3-phenyl-1-(p-tolyl)propan-1-one O-acetyl oxime (5p)**

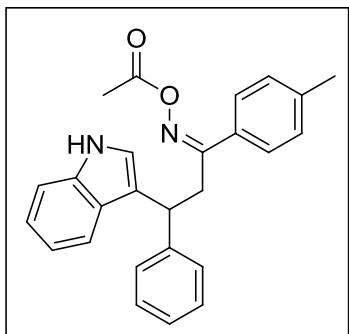

White solid, 52% yield; mp 135-137 °C;  $^1\text{H}$  NMR (400 MHz,  $\text{CDCl}_3$ )  $\delta$  8.25 (brs, 1H), 7.49 (d,  $J = 8.2$  Hz, 2H), 7.30-7.22 (m, 4H), 7.20-7.10 (m, 6H), 7.05 (d,  $J = 2.1$  Hz, 1H), 6.96 (t,  $J = 7.4$  Hz, 1H), 4.46 (t,  $J = 7.7$  Hz, 1H), 3.73-3.62 (m, 2H), 2.37 (s, 3H), 1.95 (s, 3H);  $^{13}\text{C}$  NMR (100 MHz,  $\text{CDCl}_3$ )  $\delta$  169.1, 165.1, 143.2, 140.8, 136.8, 131.3, 129.5, 128.4, 128.0, 127.6, 126.7, 122.2, 121.7, 119.7, 119.4, 118.2, 111.4, 40.7, 34.5, 19.7, 21.5; HRMS (ESI)  $m/z$  calcd. For  $\text{C}_{26}\text{H}_{24}\text{N}_2\text{O}_2\text{Na}$  ( $M+23$ ) 419.1736, found 419.1748.

**(Z)-3-(1H-indol-3-yl)-1-(naphthalen-2-yl)-3-phenylpropan-1-one O-acetyl oxime (1q)**

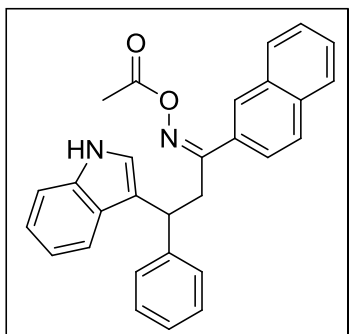

White solid, 73% yield; mp 161-163 °C, two isomers;  $^1\text{H}$  NMR (400 MHz,  $\text{CDCl}_3$ )  $\delta$  8.14 (brs, 1H), 7.92 (s, 1H), 7.83-7.73 (m, 4H), 7.50 (p,  $J = 7.6$  Hz, 2H), 7.31 (d,  $J = 8.2$  Hz, 1H), 7.27-7.19 (m, 5H), 7.16-7.00 (m, 3H), 6.95 (1H, t,  $J = 7.48$  Hz, CH), 4.54 (1H, t,  $J = 7.74$  Hz, CH), 3.82 (1H, dd,  $J = 12.94, 7.0$  Hz,  $\text{CH}_2$ ), 3.75 (1H, dd,  $J = 12.9, 8.62$  Hz,  $\text{CH}_2$ ), 1.99 (3H, s,  $\text{CH}_3$ );  $^{13}\text{C}$  NMR (100 MHz,  $\text{CDCl}_3$ )  $\delta$  168.8, 164.8, 142.9, 136.7, 134.2, 132.9, 131.4, 128.8, 128.3, 127.8, 127.6, 127.2, 126.7, 126.6, 126.5, 124.3, 122.2, 121.6, 119.6, 119.4, 118.1, 111.2, 40.7, 34.4, 19.5; HRMS (ESI)  $m/z$  calcd. For  $\text{C}_{29}\text{H}_{24}\text{N}_2\text{O}_2\text{Na}$  ( $M+23$ ) 455.1736, found 455.1752.

**(Z)-3-(1H-indol-3-yl)-1-(4-methoxyphenyl)-3-phenylpropan-1-one O-acetyl oxime (1r)**

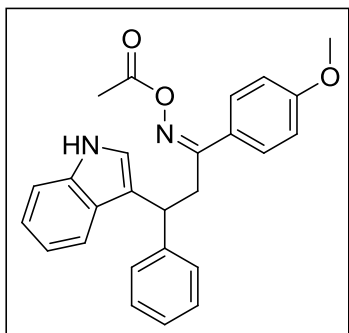

White solid, 80% yield; mp 138-139 °C; <sup>1</sup>H NMR (400 MHz, CDCl<sub>3</sub>) δ 8.06 (brs, 1H), 7.52 (d, *J* = 8.7 Hz, 2H), 7.31 (d, *J* = 8.1 Hz, 1H), 7.25-7.10 (m, 8H), 6.94 (d, *J* = 7.5 Hz, 1H), 6.84 (d, *J* = 8.7 Hz, 2H), 4.45 (t, *J* = 7.7 Hz, 1H), 3.81 (s, 3H), 3.69 (dd, *J* = 12.9, 7.0 Hz, 1H), 3.62 (dd, *J* = 13.0, 8.7 Hz, 1H), 1.91 (s, 3H); <sup>13</sup>C NMR (100 MHz, CDCl<sub>3</sub>) δ 169.1, 164.5, 161.6, 143.2, 143.2, 136.8, 129.2, 128.5, 128.0, 126.8, 126.5, 122.3, 121.6, 119.8, 119.5, 118.4, 114.2, 111.4, 55.5, 40.8, 34.4, 19.7; HRMS (ESI) *m/z* calcd. For C<sub>26</sub>H<sub>24</sub>N<sub>2</sub>O<sub>3</sub>Na (*M*+23) 435.1685, found 435.1694.

**(Z)-3-(5-bromo-1H-indol-3-yl)-1,3-diphenylpropan-1-one O-acetyl oxime (1s)**

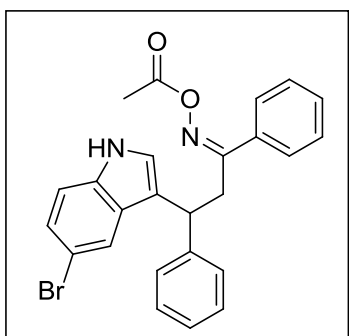

White solid, 73% yield; mp 125-127°C; <sup>1</sup>H NMR (400 MHz, CDCl<sub>3</sub>) δ 8.39 (brs, 1H), 7.50 (d, *J* = 7.4 Hz, 2H), 7.43-7.31 (m, 4H), 7.25-7.11 (m, 7H), 6.98 (d, *J* = 1.9 Hz, 1H), 4.37 (t, *J* = 7.8 Hz, 1H), 3.73 (dd, *J* = 13.0, 7.3 Hz, 1H), 3.59 (dd, *J* = 13.0, 8.5 Hz, 1H), 2.01 (s, 3H); <sup>13</sup>C NMR (100 MHz, CDCl<sub>3</sub>) δ 169.1, 165.3, 142.6, 135.4, 134.1, 130.6, 128.8, 128.6, 128.4, 127.8, 127.6, 127.0, 125.1, 123.1, 122.1, 117.7, 112.9, 112.7, 40.4, 34.7, 19.8; HRMS (ESI) *m/z* calcd. For C<sub>25</sub>H<sub>21</sub>BrN<sub>2</sub>O<sub>2</sub>Na (*M*+23) 483.0684, found 483.0697.

**(Z)-3-(5-nitro-1H-indol-3-yl)-1,3-diphenylpropan-1-one O-acetyl oxime (1t)**

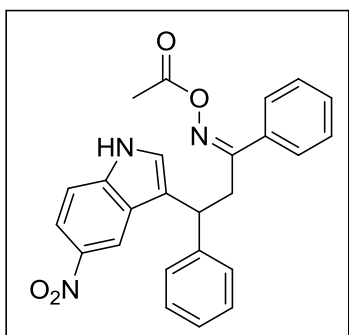

Yellow solid, 66% yield; mp 174-177 °C; <sup>1</sup>H NMR (400 MHz, (CD<sub>3</sub>)<sub>2</sub>SO) δ 11.74 (brs, 1H), 8.09 (d, *J* = 2.2 Hz, 1H), 7.92 (dd, *J* = 9.0, 2.2 Hz, 1H), 7.65 (d, *J* = 2.1 Hz, 1H), 7.55-7.53 (m, 2H), 7.48 (d, *J* = 9.0 Hz, 1H), 7.45-7.43 (m, 1H), 7.38 (t, *J* = 7.4 Hz, 2H), 7.28 (d, *J* = 7.2 Hz, 2H), 7.22 (t, *J* = 7.5 Hz, 2H), 7.14 (t, *J* = 7.16 Hz, 1H), 4.49 (t, *J* = 7.9 Hz, 1H), 3.79-3.68 (m, 2H), 2.05 (s, 3H); <sup>13</sup>C NMR (400 MHz, (CD<sub>3</sub>)<sub>2</sub>SO) δ 168.4, 165.1, 143.4, 140.6, 139.9, 134.4, 130.8, 128.9, 128.7, 128.1, 127.7, 127.0,

126.9, 125.9, 119.9, 117.0, 116.1, 112.4, 39.9, 34.3, 19.8; HRMS (ESI) *m/z* calcd. For C<sub>25</sub>H<sub>21</sub>N<sub>3</sub>O<sub>4</sub>Na (M+23) 450.1430, found 450.1431.

**(Z)-3-(5-methoxy-1H-indol-3-yl)-1,3-diphenylpropan-1-one O-acetyl oxime (1u)**

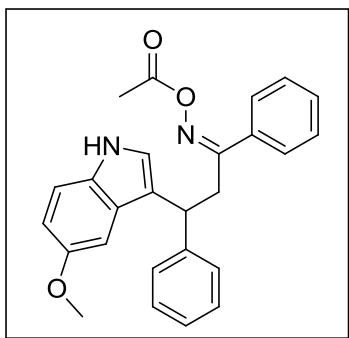

White solid, 80% yield; mp 144-146 °C; <sup>1</sup>H NMR (400 MHz, CDCl<sub>3</sub>) δ 8.27 (brs, 1H), 7.56 (d, *J* = 7.4 Hz, 2H), 7.42 (t, *J* = 7.3 Hz, 1H), 7.34 (t, *J* = 7.5 Hz, 2H), 7.26-7.15 (m, 6H), 7.00 (d, *J* = 2.2 Hz, 1H), 6.78 (dd, *J* = 8.8, 2.3 Hz, 1H), 6.66 (d, *J* = 2.2 Hz, 1H), 4.41 (t, *J* = 7.8 Hz, 1H), 3.74-3.60 (m, 5H), 2.00 (s, 3H); <sup>13</sup>C NMR (100 MHz, CDCl<sub>3</sub>) δ 169.0,

165.3, 153.8, 142.9, 134.1, 131.9, 130.5, 128.7, 128.4, 127.9, 127.6, 127.0, 126.8, 122.5, 117.7, 112.1, 101.7, 55.9, 40.6, 34.7, 19.7; HRMS (ESI) *m/z* calcd. For C<sub>26</sub>H<sub>24</sub>N<sub>2</sub>O<sub>3</sub>Na (M+23) 435.1685, found 435.1678.

**Synthesis of δ-carbolines 3a-3u**

**General procedure:**

A mixture of indolyloxime esters **1a-1u** (1 mmol) and iodine (0.102g, 0.4 eq.) in 1,2-dimethoxyethane (1,2-DME, 5 mL) was heated to 100 °C. After completion of the reaction, the mixture was allowed to cool to ambient temperature and worked up with aq. Na<sub>2</sub>S<sub>2</sub>O<sub>3</sub> (1 mL) and aq. NaHCO<sub>3</sub> (1 mL). The reaction mixture was extracted with ethyl acetate (20 mL) for three times. The combined organic layer was dried over MgSO<sub>4</sub> and concentrated under reduce pressure. The residue was purified by column chromatography on silica gel (eluent: hexane/ethyl acetate = 12:1) to afford δ-carbolines **3a-3u** and minor mixture of α-carbolines **2a-2u**.

**2,4-diphenyl-δ-carboline (3a)**

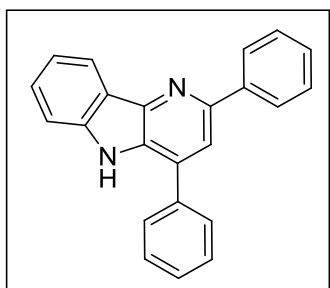

White solid, 70% yield; mp 232-234 °C; <sup>1</sup>H NMR (400 MHz, CDCl<sub>3</sub>) δ 8.49 (d, *J* = 7.8 Hz, 1H), 8.41 (brs, 1H), 8.17 (d, *J* = 7.5 Hz, 2H), 7.8 (brs, 1H), 7.76 (d, *J* = 7.3 Hz, 2H), 7.59 (t, *J* = 7.5 Hz, 2H), 7.51 (t, *J* = 7.3 Hz, 4H), 7.46-7.39 (m, 2H), 7.33 (t, *J* = 7.4 Hz, 1H); <sup>13</sup>C NMR (100 MHz, CDCl<sub>3</sub>) δ 151.4,

143.1, 141.0, 140.7, 137.2, 132.4, 130.2, 129.7, 128.9, 128.9, 128.4, 128.3, 128.1, 127.4, 123.3, 121.6, 120.6, 117.4, 111.4. HRMS (EI) *m/z* calcd. For

C<sub>23</sub>H<sub>16</sub>N<sub>2</sub> (M<sup>+</sup>) 320.1313, found 320.1317.

#### 4-(2-fluorophenyl)-2-phenyl- $\delta$ -carboline (3b)

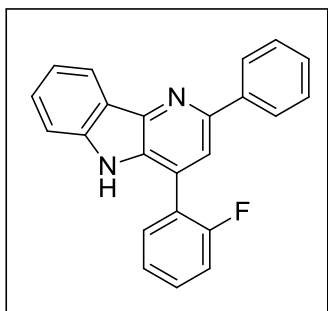

White solid, 66% yield; mp 258-259 °C; <sup>1</sup>H NMR (400 MHz, (CD<sub>3</sub>)<sub>2</sub>SO)  $\delta$  11.42 (brs, 1H), 8.31 (1H, d,  $J$  = 7.8 Hz, CH), 8.27-8.25 (m, 2H), 7.97 (s, 1H), 7.80 (td,  $J$  = 7.6, 1.7 Hz, 1H), 7.66-7.61 (m, 1H), 7.58-7.39 (m, 7H), 7.31-7.24 (m, 1H); <sup>13</sup>C NMR (100 MHz, (CD<sub>3</sub>)<sub>2</sub>SO)  $\delta$  159.9 (d,  $J_{C-F}$  = 247.3 Hz), 148.9, 142.2, 141.9, 140.1, 132.1, 132.1, 131.5 (d,  $J_{C-F}$  = 8.3 Hz), 130.7, 129.2, 128.4 (d,  $J_{C-F}$  = 24.3 Hz), 127.0, 126.9, 125.6 (d,  $J_{C-F}$  = 3.1 Hz), 124.4 (d,  $J_{C-F}$  = 15.3 Hz), 124.4, 122.0, 120.8, 120.1, 118.3, 116.8 (d,  $J_{C-F}$  = 21.5 Hz), 112.5. HRMS (ESI)  $m/z$  calcd. For C<sub>23</sub>H<sub>16</sub>FN<sub>2</sub> (M+1) 339.1292, found 339.1299.

#### 4-(2-chlorophenyl)-2-phenyl- $\delta$ -carboline (3c)

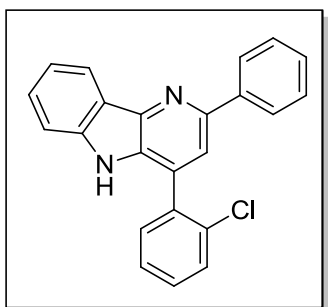

White solid, 63% yield; mp 253-255 °C; <sup>1</sup>H NMR (400 MHz, (CD<sub>3</sub>)<sub>2</sub>SO)  $\delta$  11.37 (brs, 1H), 8.32 (d,  $J$  = 7.8 Hz, 1H), 8.27-8.25 (m, 2H), 7.9 (s, 1H), 7.75-7.71 (m, 1H), 7.70-7.65 (m, 1H), 7.61-7.48 (m, 6H), 7.41-7.38 (m, 1H), 7.31-7.27 (m, 1H); <sup>13</sup>C NMR (100 MHz, (CD<sub>3</sub>)<sub>2</sub>SO)  $\delta$  148.6, 142.1, 141.9, 140.1, 135.8, 132.9, 132.3, 130.9, 130.8, 130.4, 129.2, 128.5, 128.2, 127.0, 122.1, 121.8, 120.1, 118.2, 112.6. HRMS (EI)  $m/z$  calcd. For C<sub>23</sub>H<sub>16</sub>ClN<sub>2</sub> (M+1) 355.1002, found 355.1009.

#### 4-(2-bromophenyl)-2-phenyl- $\delta$ -carboline (3d)

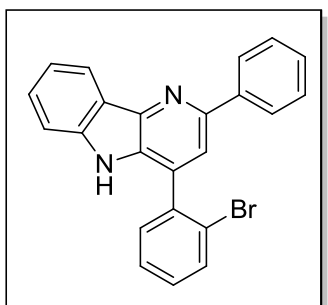

White solid, 46% yield; mp 266-267 °C; <sup>1</sup>H NMR (400 MHz, (CD<sub>3</sub>)<sub>2</sub>SO)  $\delta$  11.30 (brs, 1H), 8.28 (d,  $J$  = 7.8 Hz, 1H), 8.44-8.22 (m, 2H), 7.88-7.86 (m, 1H), 7.85 (s, 1H), 7.64-7.57 (m, 2H), 7.52-7.46 (m, 5H), 7.40-7.35 (m, 1H), 7.28-7.24 (m, 1H); <sup>13</sup>C NMR (100 MHz, (CD<sub>3</sub>)<sub>2</sub>SO)  $\delta$  148.6, 142.2, 141.9, 140.1, 137.8, 133.5, 132.2, 132.1, 131.0, 130.6, 129.2, 128.7, 128.5, 128.2, 126.9, 123.1, 122.2, 120.7, 120.1, 118.1, 112.6. HRMS (EI)  $m/z$  calcd. For C<sub>23</sub>H<sub>16</sub>BrN<sub>2</sub> (M+1) 399.0491, found 399.0493.

#### 4-(naphthalen-1-yl)-2-phenyl- $\delta$ -carboline (3e)

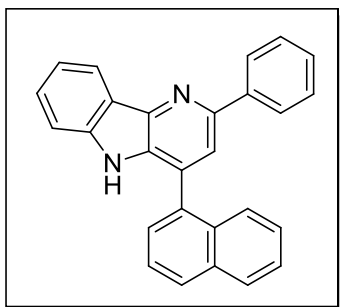

White solid, 59% yield; mp 242-243 °C;  $^1\text{H}$  NMR (400 MHz,  $\text{CDCl}_3$ )  $\delta$  8.53 (d,  $J = 7.84$  Hz, 1H), 8.18 (d,  $J = 7.4$  Hz, 2H), 8.00-7.99 (m, 3H), 7.87 (s, 1H), 7.70 (d,  $J = 8.4$  Hz, 1H), 7.66-7.60 (m, 2H), 7.43-7.38 (m, 2H), 7.57-7.46 (m, 4H), 7.35-7.29 (m, 2H);  $^{13}\text{C}$  NMR (100 MHz,  $\text{CDCl}_3$ )  $\delta$  151.0, 142.7, 140.9, 140.6, 134.5, 134.1, 131.4, 131.1, 129.4, 128.9, 128.9, 128.3, 128.1, 127.7, 127.4, 127.2, 126.7, 125.9, 125.7, 123.2, 121.6, 120.6, 119.3, 111.4. HRMS (EI)  $m/z$  calcd. For  $\text{C}_{27}\text{H}_{19}\text{N}_2$  ( $\text{M}+1$ ) 371.1548, found 371.1556.

#### 4-(2-nitrophenyl)-2-phenyl- $\delta$ -carboline (3f)

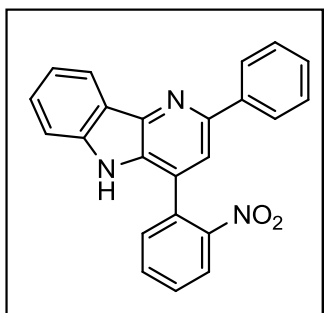

Yellow solid; mp 280-281 °C;  $^1\text{H}$  NMR (400 MHz,  $(\text{CD}_3)_2\text{SO}$ )  $\delta$  11.40 (s, 1H), 8.31-8.28 (m, 2H), 8.23-8.21 (m, 2H), 7.93 (td,  $J = 7.5, 1.1$  Hz, 1H), 7.88 (s, 1H), 7.84-7.77 (m, 2H), 7.52-7.47 (m, 4H), 7.38 (t,  $J = 7.3$  Hz, 1H), 7.29-7.26 (m, 1H);  $^{13}\text{C}$  NMR (100 MHz,  $(\text{CD}_3)_2\text{SO}$ )  $\delta$  148.8, 148.7, 141.9, 141.9, 139.9, 134.6, 133.2, 131.6, 130.8, 130.6, 129.9, 129.2, 128.5, 128.2, 126.9, 125.4, 122.2, 120.8, 120.3, 116.9, 112.5. HRMS (EI)  $m/z$  calcd. For  $\text{C}_{23}\text{H}_{15}\text{N}_3\text{O}_2$  ( $\text{M}^+$ ) 365.3841.

#### 4-(3-methoxyphenyl)-2-phenyl- $\delta$ -carboline (3g)

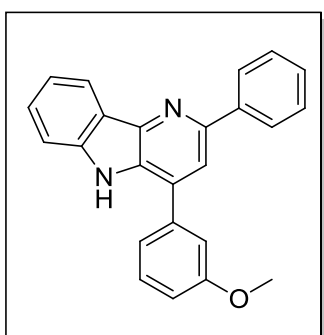

White solid, 70% yield; mp 179-181 °C;  $^1\text{H}$  NMR (400 MHz,  $\text{CDCl}_3$ )  $\delta$  8.49 (d,  $J = 7.8$  Hz, 1H), 8.41 (s, 1H), 8.17 (d,  $J = 7.6$  Hz, 2H), 7.8 (s, 1H), 7.59 (t,  $J = 7.5$  Hz, 2H), 7.53-7.38 (m, 6H), 7.35-7.27 (m, 3H), 7.04 (dd,  $J = 8.1, 1.9$  Hz, 1H), 3.89 (s, 3H);  $^{13}\text{C}$  NMR (100 MHz,  $\text{CDCl}_3$ )  $\delta$  160.6, 151.4, 143.1, 141.0, 140.7, 138.6, 132.2, 130.8, 130.2, 128.9, 128.2, 128.1, 127.4, 123.3, 121.6, 120.6, 120.6, 117.3, 114.2, 111.4, 55.7. HRMS (EI)  $m/z$  calcd. For  $\text{C}_{24}\text{H}_{19}\text{N}_2\text{O}$  ( $\text{M}+1$ ) 351.1492, found 351.1498.



### 4-(benzo[d][1,3]dioxol-5-yl)-2-phenyl- $\delta$ -carboline (3h)

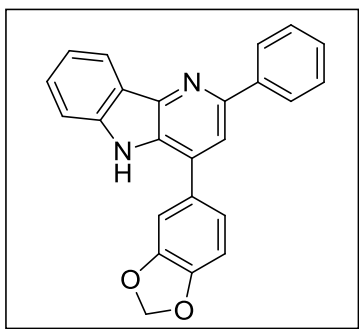

White solid, 68% yield; mp 221-222 °C;  $^1\text{H}$  NMR (400 MHz,  $\text{CDCl}_3$ )  $\delta$  8.47 (d,  $J = 7.8$  Hz, 1H), 8.34 (brs, 1H), 8.15 (d,  $J = 7.7$  Hz, 2H), 7.52-7.44 (m, 4H), 7.74 (s, 1H), 7.39 (t,  $J = 7.26$  Hz, 1H), 7.33 (t,  $J = 7.4$  Hz, 1H), 7.24 (d,  $J = 8.8$  Hz, 2H), 7.01 (d,  $J = 7.8$  Hz, 1H), 6.08 (s, 2H);  $^{13}\text{C}$  NMR (100 MHz,  $\text{CDCl}_3$ )  $\delta$  151.5, 148.9, 148.4, 143.1, 141.0, 140.8, 132.1, 130.2, 128.9, 128.2, 128.1, 127.4, 123.4, 122.1, 121.6, 120.6, 117.2, 111.4, 109.5, 108.7, 101.8. HRMS (ESI)  $m/z$  calcd. For  $\text{C}_{24}\text{H}_{17}\text{N}_2\text{O}_2$  ( $M+1$ ) 365.1290, found 365.1288.

### 2-phenyl-4-(thiophen-2-yl)- $\delta$ -carboline (3i)

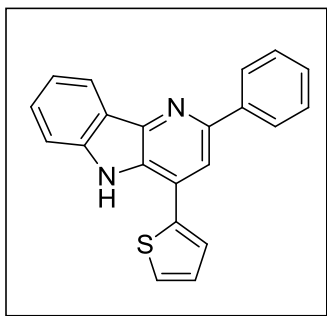

White solid, 73% yield; mp 249-250 °C;  $^1\text{H}$  NMR (400 MHz,  $\text{CDCl}_3$ )  $\delta$  8.52 (brs, 1H), 8.46 (d,  $J = 7.8$  Hz, 1H), 8.15 (d,  $J = 7.4$  Hz, 2H), 7.88 (s, 1H), 7.59 (d,  $J = 7.8$  Hz, 1H), 7.52-7.46 (m, 5H), 7.40 (t,  $J = 7.4$  Hz, 1H), 7.34-7.31 (m, 1H), 7.25-7.24 (m, 1H);  $^{13}\text{C}$  NMR (100 MHz,  $\text{CDCl}_3$ )  $\delta$  151.3, 143.6, 141.1, 140.5, 138.9, 129.2, 128.9, 128.6, 128.3, 128.3, 127.4, 126.9, 126.5, 125.2, 123.3, 121.6, 120.9, 116.2, 111.6; HRMS (ESI)  $m/z$  calcd. For  $\text{C}_{21}\text{H}_{15}\text{N}_2\text{S}$  ( $M+1$ ) 327.0596, found 327.0597.

### 2-(4-chlorophenyl)-4-phenyl- $\delta$ -carboline (3j)

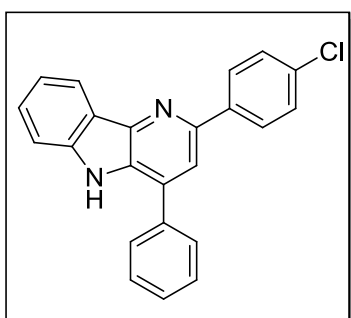

White solid, 63% yield; mp 310-311 °C;  $^1\text{H}$  NMR (400 MHz,  $(\text{CD}_3)_2\text{SO}$ )  $\delta$  11.49 (brs, 1H), 8.32-8.26 (m, 3H), 8.41 (s, 1H), 8.17 (d,  $J = 7.5$  Hz, 2H), 8.00 (s, 1H), 7.91-7.89 (m, 2H), 7.65-7.49 (m, 7H), 7.27 (t,  $J = 7.5$  Hz, 1H);  $^{13}\text{C}$  NMR (100 MHz,  $(\text{CD}_3)_2\text{SO}$ )  $\delta$  148.0, 142.7, 142.2, 139.1, 136.8, 133.2, 132.4, 130.3, 129.7, 129.2, 129.1, 129.1, 128.7, 128.19, 122.2, 120.7, 120.2, 116.9, 112.8. HRMS (EI)  $m/z$  calcd. For  $\text{C}_{23}\text{H}_{16}\text{ClN}_2$  ( $M+1$ ) 355.1002, found 355.1010.

### 2-(4-bromophenyl)-4-phenyl- $\delta$ -carboline (3k)

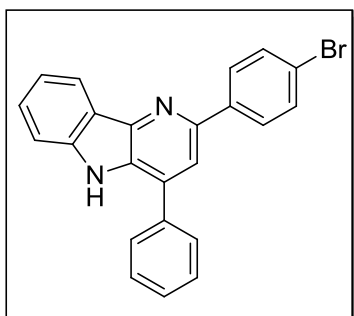

White solid, 68% yield; mp 315-317 °C;  $^1\text{H}$  NMR (400 MHz,  $(\text{CD}_3)_2\text{SO}$ )  $\delta$  11.52 (brs, 1H), 8.30-8.25 (m, 3H), 8.00 (s, 1H), 7.93-7.91 (m, 2H), 7.77-7.51 (m, 7H), 7.29 (t,  $J = 7.5$  Hz, 1H);  $^{13}\text{C}$  NMR (100 MHz,  $(\text{CD}_3)_2\text{SO}$ )  $\delta$  148.0, 142.7, 142.2, 139.4, 136.8, 132.4, 131.9, 130.3, 129.7, 129.2, 129.1, 129.1, 128.2, 122.2, 121.9, 120.8, 120.2, 116.9,

112.8. HRMS (EI)  $m/z$  calcd. For  $\text{C}_{23}\text{H}_{15}\text{BrN}_2$  ( $\text{M}^+$ ) 398.0419, found 398.0418.

### 2-(4-nitrophenyl)-4-phenyl- $\delta$ -carboline (3l)

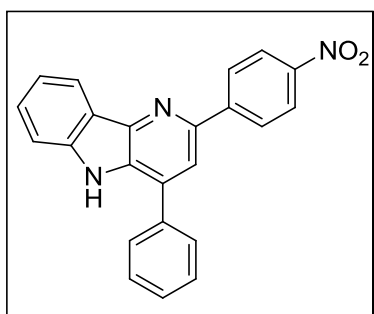

Yellow solid, 66% yield; mp 315-316 °C;  $^1\text{H}$  NMR (400 MHz,  $(\text{CD}_3)_2\text{SO}$ )  $\delta$  11.64 (brs, 1H), 8.59-8.55 (m, 2H), 8.35-8.31 (m, 3H), 8.16 (s, 1H), 7.94-7.92 (m, 2H), 7.68-7.54 (m, 5H), 7.32 (t,  $J = 7.0$  Hz, 1H);  $^{13}\text{C}$  NMR (100 MHz,  $(\text{CD}_3)_2\text{SO}$ )  $\delta$  147.3, 146.6, 146.4, 143.1, 142.4, 132.4, 136.5, 130.7, 129.7, 129.3, 129.2, 128.5,

127.8, 124.3, 122.1, 120.9, 120.5, 118.0, 112.9. HRMS (EI)  $m/z$  calcd. For  $\text{C}_{23}\text{H}_{15}\text{N}_3\text{O}_2$  ( $\text{M}^+$ ) 365.3841

### 2-(4-isopropylphenyl)-4-phenyl- $\delta$ -carboline (3m)

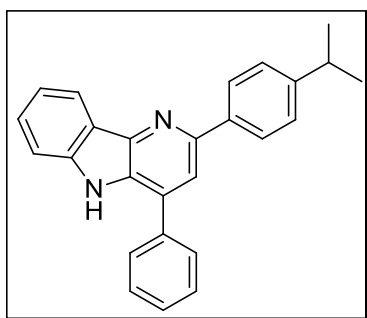

White solid, mp 245-247 °C;  $^1\text{H}$  NMR (400 MHz,  $(\text{CD}_3)_2\text{SO}$ )  $\delta$  11.45 (brs, 1H), 8.29 (d,  $J = 7.8$  Hz, 1H), 8.18 (d,  $J = 8.2$  Hz, 2H), 7.95 (s, 1H), 7.92 (d,  $J = 7.3$  Hz, 2H), 7.65 (t,  $J = 7.5$  Hz, 2H), 7.62-7.50 (m, 3H), 7.38 (2H, d,  $J = 8.2$  Hz, CH), 7.28 (t,  $J = 7.5$  Hz, 1H), 2.95 (sep,  $J = 6.9$  Hz, 1H), 1.26 (d,  $J = 6.8$  Hz, 6H);  $^{13}\text{C}$  NMR (100 MHz,

$(\text{CD}_3)_2\text{SO}$ )  $\delta$  149.6, 148.7, 142.6, 142.1, 138.0, 136.9, 132.4, 130.0, 129.7, 129.1, 129.1, 128.0, 127.1, 127.0, 122.3, 120.7, 120.1, 116.8, 112.8, 33.7, 24.3. HRMS (ESI)  $m/z$  calcd. For  $\text{C}_{26}\text{H}_{23}\text{N}_2$  ( $\text{M}+1$ ) 363.1861, found 363.1859.

### 2-(4-isobutylphenyl)-4-phenyl- $\delta$ -carboline (3n)

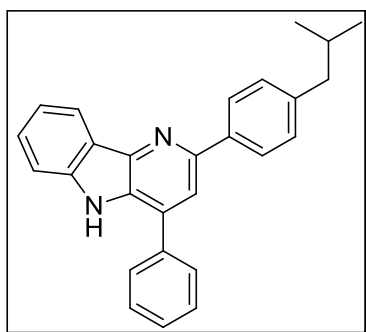

White solid, 68% yield; mp 254-255 °C;  $^1\text{H}$  NMR (400 MHz,  $\text{CDCl}_3$ )  $\delta$  8.50 (d,  $J = 7.8$  Hz, 1H), 8.29 (brs, 1H), 8.08 (d,  $J = 8.1$  Hz, 2H), 7.80 (s, 1H), 7.77 (d,  $J = 7.4$  Hz, 2H), 7.61 (t,  $J = 7.54$  Hz, 2H), 7.54-7.50 (m, 2H), 7.45 (d,  $J = 8.0$  Hz, 1H), 7.34 (t,  $J = 7.44$  Hz, 1H), 7.29 (d,  $J = 8.0$  Hz, 2H), 2.56 (d,  $J = 7.2$  Hz, 2H), 1.94 (sep,  $J = 6.7$  Hz, 1H), 0.95 (d,  $J = 6.6$  Hz, 1H);  $^{13}\text{C}$  NMR (100 MHz,  $\text{CDCl}_3$ )  $\delta$  151.5, 142.9, 141.8, 140.8, 138.1, 137.1, 132.2, 129.8, 129.5, 129.5, 128.8, 128.2, 127.8, 126.9, 123.2, 121.4, 120.4, 117.1, 111.1, 45.2, 30.3, 22.4; HRMS (ESI)  $m/z$  calcd. For  $\text{C}_{27}\text{H}_{25}\text{N}_2$  ( $M+1$ ) 377.2018, found 377.2015.

### 2-(4-(tert-butyl)phenyl)-4-phenyl- $\delta$ -carboline (3o)

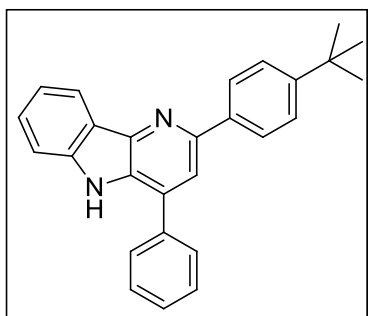

White solid, 63% yield; mp 284-285 °C;  $^1\text{H}$  NMR (400 MHz,  $\text{CDCl}_3$ )  $\delta$  8.49 (d,  $J = 7.8$  Hz, 1H), 8.36 (brs, 1H), 8.09 (d,  $J = 8.4$  Hz, 2H), 7.79 (brs, 1H), 7.77-7.75 (m, 2H), 7.6 (t,  $J = 7.5$  Hz, 2H), 7.55-7.49 (m, 4H), 7.45 (d,  $J = 8.0$  Hz, 1H), 7.34 (t,  $J = 7.4$  Hz, 1H), 1.40 (s, 9H);  $^{13}\text{C}$  NMR (100 MHz,  $\text{CDCl}_3$ )  $\delta$  151.6, 151.3, 143.1, 140.9, 138.0, 137.3, 132.3, 130.1, 129.7, 128.9, 128.4, 127.9, 127.1, 125.9, 123.4, 121.6, 120.6, 117.3, 111.4, 34.8, 31.6; HRMS (ESI)  $m/z$  calcd. For  $\text{C}_{27}\text{H}_{25}\text{N}_2$  ( $M+1$ ) 377.2018, found 377.2019.

### 4-phenyl-2-(p-tolyl)- $\delta$ -carboline (3p)

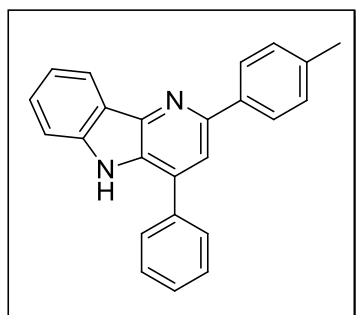

White solid, 67% yield; mp 304-305 °C;  $^1\text{H}$  NMR (400 MHz,  $(\text{CD}_3)_2\text{SO}$ )  $\delta$  11.45 (brs, 1H), 8.30 (d,  $J = 7.8$  Hz, 1H), 8.19 (d,  $J = 8.0$  Hz, 2H), 7.96 (s, 1H), 7.92 (d,  $J = 7.3$  Hz, 2H), 7.68-7.50 (m, 5H), 7.77-7.51 (m, 7H), 7.33-7.20 (m, 3H), 2.38 (s, 3H);  $^{13}\text{C}$  NMR (100 MHz,  $(\text{CD}_3)_2\text{SO}$ )  $\delta$  149.5, 142.6, 142.1, 137.7, 137.5, 136.9, 132.4, 130.01, 129.7, 129.7, 129.1, 129.1, 127.9, 126.9, 122.3, 120.7, 120.1, 116.7, 112.7, 21.3. HRMS (ESI)  $m/z$  calcd. For  $\text{C}_{24}\text{H}_{19}\text{N}_2$  ( $M+1$ ) 335.1548 found 335.1556.

### 2-(naphthalen-2-yl)-4-phenyl- $\delta$ -carboline (3q)

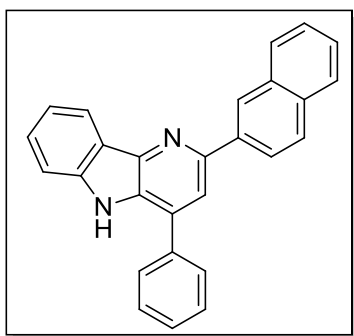

Yellow solid, 65% yield; mp 286-287 °C;  $^1\text{H}$  NMR (400 MHz,  $(\text{CD}_3)_2\text{SO}$ )  $\delta$  11.53 (brs, 1H), 8.84 (s, 1H), 8.56 (dd,  $J = 8.6, 1.6$  Hz, 1H), 8.37 (d,  $J = 7.8$  Hz, 1H), 8.21 (s, 1H), 8.08 (t,  $J = 8.6$  Hz, 2H), 7.98 (d,  $J = 7.6$  Hz, 3H), 7.71-7.52 (m, 7H), 7.32 (t,  $J = 7.4$  Hz, 1H);  $^{13}\text{C}$  NMR (100 MHz,  $(\text{CD}_3)_2\text{SO}$ )  $\delta$  149.2, 142.8, 142.2, 137.7, 136.9, 133.8, 133.3, 132.5, 130.3, 129.7, 129.2, 129.2, 128.9, 128.5, 128.1, 128.1, 128.0, 126.8, 126.6, 125.8, 125.4, 122.4, 120.8, 120.2, 117.4, 112.8. HRMS (EI)  $m/z$  calcd. For  $\text{C}_{27}\text{H}_{18}\text{N}_2$  ( $\text{M}^+$ ) 370.1470, found 370.1468.

### 2-(4-methoxyphenyl)-4-phenyl- $\delta$ -carboline (3r)

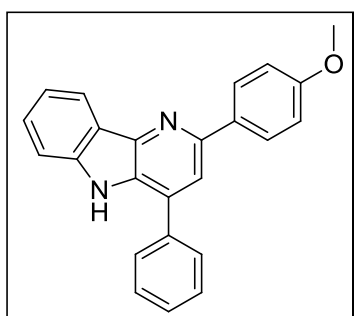

White solid, 80% yield; mp 288-290 °C;  $^1\text{H}$  NMR (400 MHz,  $(\text{CD}_3)_2\text{SO}$ )  $\delta$  11.38 (brs, 1H), 8.29-8.19 (m, 3H), 7.90-7.88 (s, 2H), 7.65-7.47 (m, 5H), 7.25 (t,  $J = 7.4$  Hz, 1H), 7.05 (d,  $J = 8.6$  Hz, 2H), 3.81 (s, 3H);  $^{13}\text{C}$  NMR (100 MHz,  $(\text{CD}_3)_2\text{SO}$ )  $\delta$  159.9, 149.4, 142.5, 142.1, 137.0, 132.9, 132.4, 129.8, 129.7, 129.1, 129.1, 128.3, 127.9, 122.3, 120.7, 120.0, 116.4, 114.5, 112.7, 55.7. HRMS (EI)  $m/z$  calcd. For  $\text{C}_{24}\text{H}_{18}\text{N}_2\text{O}$  ( $\text{M}^+$ ) 350.1419, found 350.1422.

### 8-bromo-2,4-diphenyl- $\delta$ -carboline (3s)

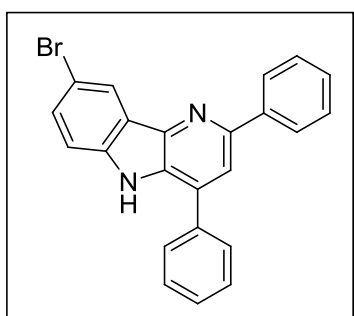

White solid, 70% yield; mp 219-222 °C;  $^1\text{H}$  NMR (400 MHz,  $(\text{CD}_3)_2\text{SO}$ )  $\delta$  11.63 (brs, 1H), 8.38 (d,  $J = 1.9$  Hz, 1H), 8.29-8.27 (m, 2H), 8.02 (s, 1H), 7.91-7.89 (m, 2H), 7.66-7.62 (m, 3H), 7.58-7.54 (m, 2H), 7.50 (t,  $J = 7.6$  Hz, 2H), 7.40 (t,  $J = 7.3$  Hz, 1H);  $^{13}\text{C}$  NMR (100 MHz,  $(\text{CD}_3)_2\text{SO}$ )  $\delta$  150.0, 141.3, 140.7, 139.9, 136.6, 133.0, 130.7, 130.4, 129.7, 129.3, 129.1, 129.1, 128.6, 127.1, 124.1, 122.9, 117.7, 114.9, 112.3; HRMS (ESI)  $m/z$  calcd. For  $\text{C}_{23}\text{H}_{16}\text{BrN}_2$  ( $\text{M}+1$ ) 399.0491, found 399.0484.

### 8-nitro-2,4-diphenyl- $\delta$ -carboline (3t)

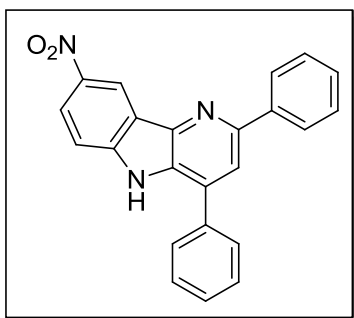

Yellow solid, 60% yield; mp 254-256 °C;  $^1\text{H}$  NMR (400 MHz,  $(\text{CD}_3)_2\text{SO}$ )  $\delta$  12.18 (brs, 1H), 9.07 (d,  $J$  = 1.6 Hz, 1H), 8.36 (dd,  $J$  = 8.8, 1.9 Hz, 1H), 8.30 (d,  $J$  = 7.5 Hz, 2H), 8.08 (s, 1H), 7.89 (d,  $J$  = 7.3 Hz, 1H), 7.72-7.51 (m, 6H), 7.44 (t,  $J$  = 7.1 Hz, 1H),  $^{13}\text{C}$  NMR (100 MHz,  $(\text{CD}_3)_2\text{SO}$ )  $\delta$  151.1, 144.9, 142.3, 139.6, 136.1, 133.9, 131.8, 129.8, 129.6, 129.2, 128.9, 127.3, 123.2, 121.9, 118.5, 117.2, 113.2; HRMS (ESI)  $m/z$  calcd. For  $\text{C}_{23}\text{H}_{16}\text{N}_3\text{O}_2$  ( $M+1$ ) 366.1243, found 366.1243.

### 8-methoxy-2,4-diphenyl- $\delta$ -carboline (3u)

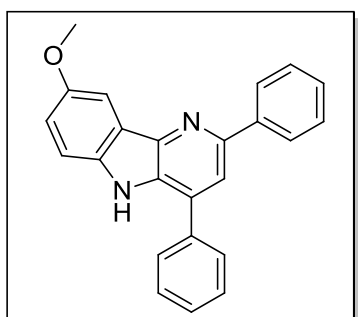

White solid, 76% yield; mp 259-260 °C;  $^1\text{H}$  NMR (400 MHz,  $(\text{CD}_3)_2\text{SO}$ )  $\delta$  11.27 (brs, 1H), 8.27 (d,  $J$  = 7.5 Hz, 2H), 7.95 (brs, 1H), 7.90 (d,  $J$  = 7.3 Hz, 2H), 7.73 (d,  $J$  = 2.0 Hz, 1H), 7.63 (t,  $J$  = 7.5 Hz, 2H), 7.56-7.48 (m, 4H), 7.38 (t,  $J$  = 7.2 Hz, 2H), 7.14 (dd,  $J$  = 8.7, 2.3 Hz, 1H), 3.89 (s, 3H);  $^{13}\text{C}$  NMR (100 MHz,  $(\text{CD}_3)_2\text{SO}$ )  $\delta$  154.2, 149.0, 142.5, 140.3, 137.0, 136.9, 132.4, 130.7, 129.7, 129.1, 129.1, 129.0, 128.4, 127.1, 122.6, 118.1, 116.8, 113.7, 102.2, 56.0. HRMS (ESI)  $m/z$  calcd. For  $\text{C}_{24}\text{H}_{19}\text{N}_2\text{O}$  ( $M+1$ ) 351.1492, found 351.1493.

### Synthesis of $\alpha$ -carbolines 2a-2u

#### General procedure:

A mixture of indolyloxime esters **1a-1u** (1 mmol) and 2,3-Dichloro-5,6-dicyano-1,4-benzoquinone (DDQ, 0.227g, 1 eq.) in 1,2-dichloroethane (1,2-DCE, 10 mL) was stirred at ambient temperature for 30 min, followed by addition of iodine (0.508g, 20 mol%) and the reaction mixture was heated to 60 °C. After completion of the reaction, the mixture was allowed to cool to ambient temperature and diluted with ethyl acetate (50 mL). The reaction mixture was washed with aq. 1M NaOH (10 mL) for two times. The combined water layer was extracted with ethyl acetate (20 mL) for three times. The combined organic layer was dried over  $\text{MgSO}_4$  and concentrated under reduced pressure. The residue was purified by column chromatography on silica gel (eluent: hexane/ethyl acetate = 12:1) to afford  $\alpha$ -carbolines **2a-2u**.

### 2,4-diphenyl- $\alpha$ -carboline (2a)

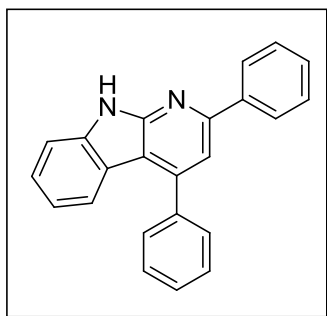

White solid, 70% yield; mp 216.5-217.5°C;  $^1\text{H}$  NMR (400 MHz,  $\text{CDCl}_3$ ),  $\delta$  11.81 (brs, 1H), 8.24 (td,  $J = 6.2, 1.2$  Hz, 2H), 7.78-7.77 (m, 2H), 7.49-7.46 (m, 8H), 7.22 (td,  $J = 7.8, 0.8$  Hz, 1H), 6.96 (td,  $J = 7.7, 0.6$  Hz, 1H), 6.55 (d,  $J = 8.2$  Hz, 1H);  $^{13}\text{C}$  NMR  $\delta$  154.5, 153.5, 146.4, 140.4, 139.6, 139.5, 129.3, 129.0, 128.9, 128.9, 128.8, 128.0, 126.6, 122.5, 120.8, 119.7, 114.6, 113.1, 111.6; HRMS (EI)  $m/z$  calcd. For  $\text{C}_{23}\text{H}_{16}\text{N}_2$  ( $\text{M}^+$ ) 320.1313, found 320.1313.

### 4-(2-fluorophenyl)-2-phenyl- $\alpha$ -carboline (2b)

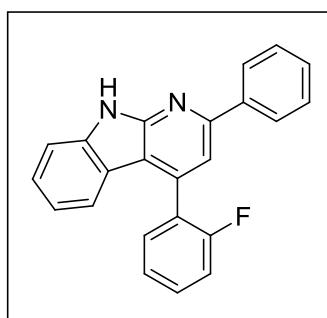

White solid, 77% yield; mp 250-251 °C;  $^1\text{H}$  NMR (400 MHz,  $\text{CDCl}_3$ )  $\delta$  11.79 (brs, 1H), 8.21 (d,  $J = 7.3$  Hz, 2H), 7.65-7.47 (m, 6H), 7.41-7.30 (m, 3H), 7.18 (t,  $J = 7.58$  Hz, 1H), 6.98 (t,  $J = 7.5$  Hz, 1H), 6.55 (d,  $J = 8.1$  Hz, 1H);  $^{13}\text{C}$  NMR (100MHz,  $\text{CDCl}_3$ )  $\delta$  160.9, 158.5, 154.2, 153.0, 140.1, 139.4, 131.2, 131.2, 130.6, 130.6, 129.1, 128.8, 127.8, 126.8, 126.6, 126.5, 124.5, 122.0, 120.6, 119.8, 116.3, 116.1, 114.9, 113.7, 111.3; HRMS (ESI)  $m/z$  calcd. For  $\text{C}_{23}\text{H}_{16}\text{N}_2\text{F}$  ( $\text{M}+1$ ) 339.1298, found 339.1300.

### 4-(2-chlorophenyl)-2-phenyl- $\alpha$ -carboline (2c)

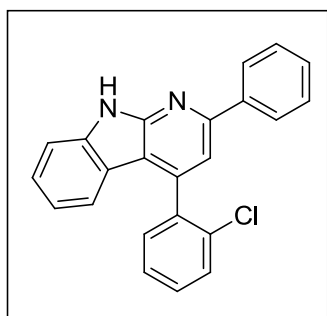

White solid, 90% yield; mp 243-244 °C;  $^1\text{H}$  NMR (400 MHz,  $\text{CDCl}_3$ )  $\delta$  11.42 (brs, 1H), 8.22 (d,  $J = 7.4$  Hz, 2H), 7.66-7.64 (m, 1H), 7.58-7.45 (m, 7H), 7.21 (7,  $J = 7.7$  Hz, 1H), 7.15 (d,  $J = 7.8$  Hz, 1H), 6.98 (t,  $J = 7.5$  Hz, 1H), 6.67 (d,  $J = 8.1$  Hz, 1H);  $^{13}\text{C}$  NMR (100MHz,  $\text{CDCl}_3$ )  $\delta$  154.3, 153.2, 142.9, 140.3, 139.6, 138.0, 133.2, 130.9, 130.2, 130.1, 129.4, 129.0, 128.1, 127.3, 126.7, 122.2, 120.7, 119.9, 114.7, 113.9, 111.6; HRMS (ESI)  $m/z$  calcd. For  $\text{C}_{23}\text{H}_{16}\text{N}_2\text{Cl}$  ( $\text{M}+1$ ) 355.1002, found 355.1002.

#### 4-(2-bromophenyl)-2-phenyl- $\alpha$ -carboline (2d)

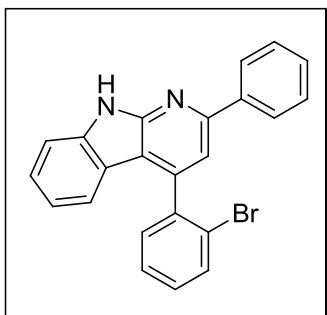

Brown solid, 85% yield; mp 254-255 °C;  $^1\text{H}$  NMR (400 MHz,  $\text{CDCl}_3$ )  $\delta$  11.73 (brs, 1H), 8.24 (d,  $J = 7.2$  Hz, 2H), 7.84 (d,  $J = 8.0$  Hz, 1H), 7.58-7.49 (m, 6H), 7.45-7.40 (m, 1H), 7.19 (t,  $J = 7.6$  Hz, 1H), 7.11 (d,  $J = 7.9$  Hz, 1H), 6.97 (t,  $J = 7.6$  Hz, 1H), 6.58 (d,  $J = 8.2$  Hz, 1H);  $^{13}\text{C}$  NMR (100MHz,  $\text{CDCl}_3$ )  $\delta$  154.3, 153.1, 144.5, 140.3, 140.0, 139.5, 133.4, 130.9, 130.2, 129.3, 129.0, 128.0, 127.9, 126.7, 122.8, 122.3, 120.7, 120.0, 114.5, 113.7, 111.5; HRMS (ESI)  $m/z$  calcd. For  $\text{C}_{23}\text{H}_{16}\text{N}_2\text{Br}$  ( $M+1$ ) 399.0497, found 399.0497.

#### 4-(naphthalen-1-yl)-2-phenyl- $\alpha$ -carboline (2e)

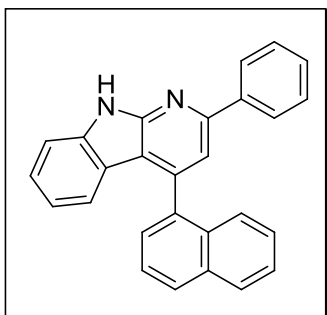

White solid, 57% yield; mp 247-248 °C;  $^1\text{H}$  NMR (400 MHz,  $\text{CDCl}_3$ )  $\delta$  12.07 (brs, 1H), 8.29 (d,  $J = 7.3$  Hz, 2H), 8.07 (dd,  $J = 6.9, 2.0$  Hz, 1H), 8.03 (d,  $J = 8.2$  Hz, 1H), 7.75-7.67 (m, 4H), 7.59-7.49 (m, 4H), 7.36 (d,  $J = 7.6$  Hz, 1H), 7.13-7.09 (m, 1H), 6.79-6.73 (m, 2H), 6.53 (d,  $J = 8.1$  Hz, 1H);  $^{13}\text{C}$  NMR (100MHz,  $\text{CDCl}_3$ )  $\delta$  154.1, 153.1, 144.3, 140.1, 139.4, 136.8, 133.6, 131.1, 129.2, 128.8, 128.8, 128.4, 127.8, 126.6, 126.5, 126.3, 126.2, 125.9, 125.5, 122.4, 120.6, 119.6, 115.4, 114.6, 111.2; HRMS (ESI)  $m/z$  calcd. For  $\text{C}_{27}\text{H}_{19}\text{N}_2$  ( $M+1$ ) 371.1548, found 371.1549.

#### 4-(2-nitrophenyl)-2-phenyl- $\alpha$ -carboline (2f)

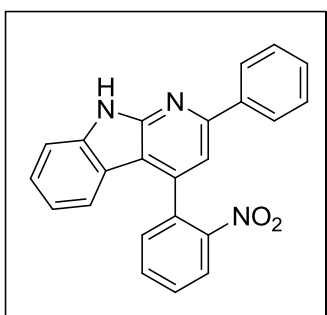

Yellow solid, 93% yield; mp 238-239 °C;  $^1\text{H}$  NMR (400 MHz,  $\text{CDCl}_3$ )  $\delta$  11.83 (brs, 1H), 8.26 (d,  $J = 8.2$  Hz, 1H), 8.20 (d,  $J = 7.4$  Hz, 2H), 7.81 (t,  $J = 7.5$  Hz, 1H), 7.73 (t,  $J = 7.8$  Hz, 1H), 7.66 (d,  $J = 7.5$  Hz, 1H), 7.57-7.50 (m, 4H), 7.17 (t,  $J = 7.6$  Hz, 1H), 7.02 (d,  $J = 7.9$  Hz, 1H), 6.93 (t,  $J = 7.5$  Hz, 1H), 6.54 (d,  $J = 8.2$  Hz, 1H);  $^{13}\text{C}$  NMR (100MHz,  $\text{CDCl}_3$ )  $\delta$  154.6, 153.0, 148.7, 141.6, 140.1, 139.6, 134.3, 133.6, 132.0, 129.8, 129.4, 129.1, 128.1, 126.9, 125.1, 121.5, 120.3, 120.1, 113.3, 111.8; HRMS (ESI)  $m/z$  calcd. For  $\text{C}_{23}\text{H}_{16}\text{N}_3\text{O}_2$  ( $M+1$ ) 366.1243, found 366.1242.

#### 4-(3-methoxyphenyl)-2-phenyl- $\alpha$ -carboline (2g)

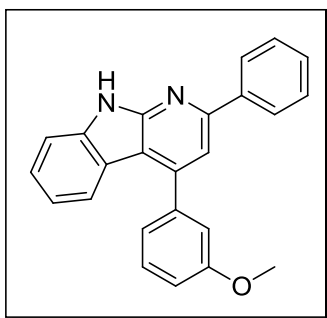

Yellow solid, 71% yield; mp 194-195 °C;  $^1\text{H}$  NMR (400 MHz,  $\text{CDCl}_3$ )  $\delta$  11.91 (brs, 1H), 8.25-8.23 (m, 2H), 7.69 (d,  $J = 7.9$  Hz, 1H), 7.61 (s, 1H), 7.59-7.49 (m, 4H), 7.36 (d,  $J = 7.6$  Hz, 1H), 7.31-7.30 (m, 1H), 7.21-7.17 (m, 1H), 7.11 (dd,  $J = 8.2, 2.5$  Hz, 1H), 7.00 (t,  $J = 7.6$  Hz, 1H), 6.54 (d,  $J = 8.2$  Hz, 1H), 3.90 (3H, s,  $\text{CH}_3$ );  $^{13}\text{C}$  NMR (100MHz,  $\text{CDCl}_3$ )  $\delta$  159.9, 154.3, 153.1, 145.9, 140.6, 140.1, 139.3, 129.9, 129.1, 128.8, 127.7, 126.4, 122.5, 121.1, 120.6, 119.6, 114.5, 114.3, 114.0, 112.7, 111.2, 55.4; HRMS (ESI)  $m/z$  calcd. For  $\text{C}_{24}\text{H}_{19}\text{N}_2\text{O}$  ( $M+1$ ) 351.1497, found 351.1500.

#### 4-(benzo[d][1,3]dioxol-5-yl)-2-phenyl- $\alpha$ -carboline (2h)

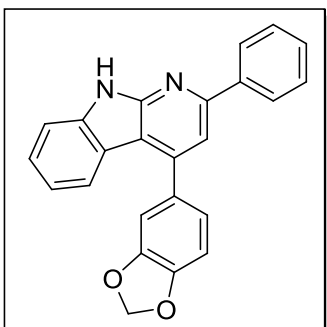

White solid, 82% yield; mp 242-243 °C;  $^1\text{H}$  NMR (400 MHz,  $\text{CDCl}_3$ )  $\delta$  11.41 (brs, 1H), 8.19 (d,  $J = 7.2$  Hz, 2H), 7.74 (d,  $J = 8.0$  Hz, 1H), 7.56-7.48 (m, 4H), 7.25-7.19 (m, 3H), 7.04-7.01 (m, 2H), 6.66 (d,  $J = 8.6$  Hz, 1H), 6.10 (s, 1H);  $^{13}\text{C}$  NMR (100MHz,  $\text{CDCl}_3$ )  $\delta$  154.5, 153.5, 148.3, 148.2, 146.0, 140.4, 139.5, 133.3, 129.3, 129.0, 127.9, 126.6, 122.7, 122.6, 120.8, 119.7, 114.6, 113.0, 111.5, 109.5, 108.9, 101.6; HRMS (ESI)  $m/z$  calcd. For  $\text{C}_{24}\text{H}_{17}\text{N}_2\text{O}_2$  ( $M+1$ ) 365.1290, found 365.1290.

#### 2-phenyl-4-(thiophen-2-yl)- $\alpha$ -carboline (2i)

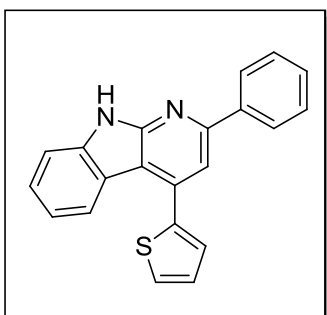

White solid, 73% yield; mp 249-250 °C;  $^1\text{H}$  NMR (400 MHz,  $\text{CDCl}_3$ )  $\delta$  11.37 (brs, 1H), 8.20 (d,  $J = 7.1$  Hz, 2H), 8.00 (d,  $J = 8.06$  Hz, 1H), 7.66 (s, 1H), 7.62 (dd,  $J = 3.5, 0.7$  Hz, 1), 7.57-7.48 (m, 4H), 7.29 (dd,  $J = 5.0, 3.6$  Hz, 1H), 7.23 (d,  $J = 7.1$  Hz, 1), 7.06 (t,  $J = 7.6$  Hz, 1H), 6.66 (d,  $J = 8.1$  Hz, 1H);  $^{13}\text{C}$  NMR (100MHz,  $\text{CDCl}_3$ )  $\delta$  154.2, 153.4, 140.3, 139.9, 139.3, 138.7, 129.1, 128.9, 127.8, 127.7, 127.7, 126.6, 122.3, 120.5, 119.6, 115.1, 112.9, 111.4; HRMS (ESI)  $m/z$  calcd. For  $\text{C}_{21}\text{H}_{15}\text{N}_2\text{S}$  ( $M+1$ ) 327.0956, found 327.0955.



### 2-(4-chlorophenyl)-4-phenyl- $\alpha$ -carboline (2j)

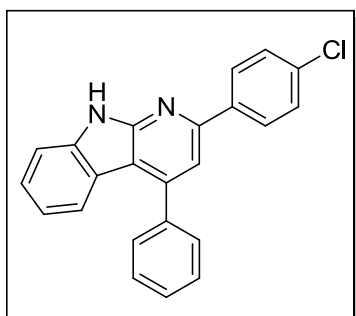

White solid, 96% yield; mp 271-273 °C;  $^1\text{H}$  NMR (400 MHz,  $(\text{CD}_3)_2\text{SO}$ )  $\delta$  12.11 (brs, 1H), 8.23 (d,  $J$  = 7.4 Hz, 2H), 7.80 (d,  $J$  = 8.4 Hz, 2H), 7.69 (d,  $J$  = 8.4 Hz, 2H), 7.54-7.50 (m, 4H), 7.46-7.40 (m, 2H), 7.06 (t,  $J$  = 7.8 Hz, 1H);  $^{13}\text{C}$  NMR (100MHz,  $(\text{CD}_3)_2\text{SO}$ )  $\delta$  153.6, 153.1, 144.2, 140.1, 139.6, 137.9, 134.1, 131.0, 129.4, 129.3, 129.2, 127.4, 127.0, 122.2, 120.1, 119.9, 113.3, 111.9, 111.7; HRMS (ESI)  $m/z$  calcd. For  $\text{C}_{23}\text{H}_{16}\text{N}_2\text{Cl}$  ( $M+1$ ) 355.1002, found 355.0999.

### 2-(4-bromophenyl)-4-phenyl- $\alpha$ -carboline (2k)

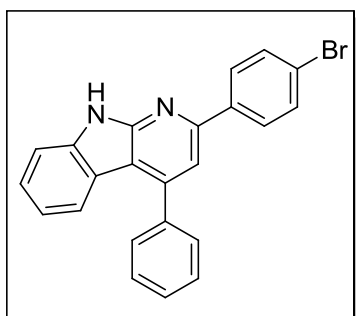

White solid, 80% yield; mp 287-288 °C;  $^1\text{H}$  NMR (400 MHz,  $(\text{CD}_3)_2\text{SO}$ )  $\delta$  12.11 (brs, 1H), 8.20 (d,  $J$  = 8.5 Hz, 2H), 7.78-7.76 (m, 2H), 7.70-7.68 (m, 2H), 7.65-7.59 (m, 3H), 7.53 (d,  $J$  = 8.8 Hz, 2H), 7.41 (t,  $J$  = 7.7 Hz, 1H);  $^{13}\text{C}$  NMR (100MHz,  $(\text{CD}_3)_2\text{SO}$ )  $\delta$  152.4, 151.6, 145.1, 139.6, 138.4, 138.3, 131.5, 1288, 128.7, 128.7, 128.5, 126.5, 122.2, 121.7, 119.7, 119.2, 112.7, 111.6, 111.3; HRMS (ESI)  $m/z$  calcd. For  $\text{C}_{23}\text{H}_{16}\text{N}_2\text{Br}$  ( $M+1$ ) 399.0497, found 399.0498.

### 2-(4-nitrophenyl)-4-phenyl- $\alpha$ -carboline (2l)

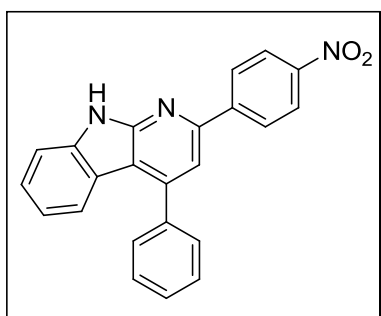

Yellow solid, 96% yield; mp 296-297 °C;  $^1\text{H}$  NMR (400 MHz,  $(\text{CD}_3)_2\text{SO}$ )  $\delta$  12.19 (brs, 1H), 8.49 (d,  $J$  = 8.9 Hz, 2H), 8.31 (d,  $J$  = 9.0 Hz, 2H), 7.81 (s, 1H), 7.78-7.75 (m, 2H), 7.66-7.58 (m, 3H), 7.55-7.53 (m, 2H), 7.43 (t,  $J$  = 8.9 Hz, 1H), 7.04 (t,  $J$  = 7.5 Hz, 1H);  $^{13}\text{C}$  NMR (100MHz,  $(\text{CD}_3)_2\text{SO}$ )  $\delta$  152.9, 150.6, 147.8, 145.7, 145.6, 140.5, 138.7, 129.4, 129.3, 129.3, 129.1, 128.3, 127.6, 124.3, 122.5, 120.0, 119.9, 114.4, 113.1, 111.9; HRMS (ESI)  $m/z$  calcd. For  $\text{C}_{23}\text{H}_{16}\text{N}_3\text{O}_2$  ( $M+1$ ) 366.1243, found 366.1241.

### 2-(4-isopropylphenyl)-4-phenyl- $\alpha$ -carboline (2m)

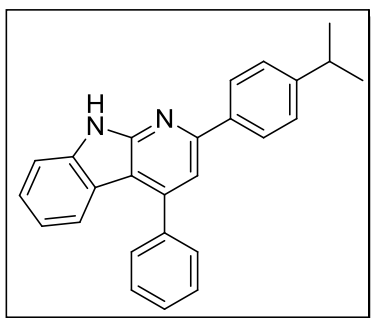

White solid, 52% yield; mp 272-273 °C;  $^1\text{H}$  NMR (400 MHz,  $\text{CDCl}_3$ )  $\delta$  12.55 (brs, 1H), 8.18 (d,  $J$  = 8.0 Hz, 2H), 7.78 (d,  $J$  = 7.0 Hz, 2H), 7.63-7.54 (m, 5H), 7.44 (d,  $J$  = 8.1 Hz, 2H), 7.11 (t,  $J$  = 7.7 Hz, 1H), 6.96 (t,  $J$  = 7.6 Hz, 1H), 6.29 (d,  $J$  = 8.0 Hz, 1H), 3.05 (sep,  $J$  = 6.9 Hz, 1H), 1.37 (d,  $J$  = 6.9 Hz, 6H);  $^{13}\text{C}$  NMR (100MHz,  $\text{CDCl}_3$ )  $\delta$  154.7, 153.7, 150.0, 146.4, 139.7, 139.6, 138.2, 128.9, 128.8, 128.2, 127.5, 126.3, 122.3, 120.7, 119.5, 114.4, 112.9, 111.7, 34.31, 24.3; HRMS (ESI)  $m/z$  calcd. For  $\text{C}_{26}\text{H}_{23}\text{N}_2$  ( $M+1$ ) 363.1861, found 363.1858.

### 2-(4-isobutylphenyl)-4-phenyl- $\alpha$ -carboline (2n)

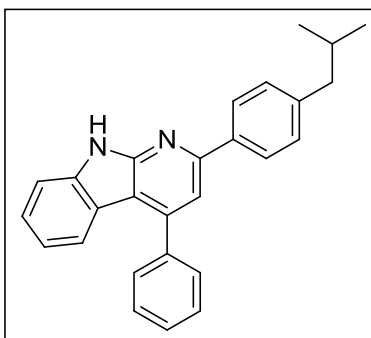

White solid, 61% yield; mp 241.5-242.2°C;  $^1\text{H}$  NMR (400 MHz,  $\text{CDCl}_3$ )  $\delta$  11.47 (brs, 1H), 8.13 (d,  $J$  = 8.0 Hz, 2H), 7.75 (d,  $J$  = 7.0 Hz, 2H), 7.62-7.54 (m, 5H), 7.32 (d,  $J$  = 7.9 Hz, 2H), 7.17 (t,  $J$  = 7.5 Hz, 1H), 6.90 (t,  $J$  = 7.6 Hz, 1H), 6.70 (1H, d,  $J$  = 8.0 Hz, CH), 2.58 (2H, d,  $J$  = 7.1 Hz, 2H), 1.96 (n,  $J$  = 6.7 Hz, 1H), 0.98 (d,  $J$  = 6.5 Hz, 6H);  $^{13}\text{C}$  NMR  $\delta$  154.6, 153.5, 146.3, 142.9, 139.5, 137.8, 130.1, 128.9, 128.8, 127.7, 126.4, 122.4, 120.8, 119.6, 114.4, 112.8, 111.6, 45.4, 30.5, 22.7; HRMS (ESI)  $m/z$  calcd. For  $\text{C}_{27}\text{H}_{25}\text{N}_2$  ( $M+1$ ) 377.2012, found 377.2018.

### 2-(4-(tert-butyl)phenyl)-4-phenyl- $\alpha$ -carboline (2o)

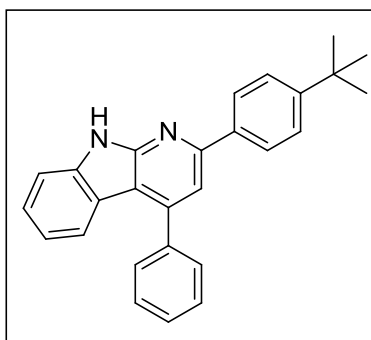

White solid, 60% yield; mp 237-238 °C;  $^1\text{H}$  NMR (400 MHz,  $\text{CDCl}_3$ )  $\delta$  12.45 (brs, 1H), 8.18 (d,  $J$  = 8.4 Hz, 2H), 7.77 (d,  $J$  = 6.7 Hz, 2H), 7.63-7.56 (m, 7H), 7.10 (t,  $J$  = 7.6 Hz, 1H), 6.96 (t,  $J$  = 7.5 Hz, 1H), 6.30 (d,  $J$  = 8.1 Hz, 2H), 1.43 (s, 9H);  $^{13}\text{C}$  NMR (100MHz,  $\text{CDCl}_3$ )  $\delta$  154.7, 153.6, 152.2, 146.3, 139.6, 139.6, 137.7, 128.9, 128.8, 127.9, 126.3, 122.3, 120.7, 119.5, 114.5, 112.9, 111.7, 34.9, 31.6; HRMS (ESI)  $m/z$  calcd. For  $\text{C}_{27}\text{H}_{25}\text{N}_2$  ( $M+1$ ) 377.2018, found 377.2021.

#### 4-phenyl-2-(p-tolyl)- $\alpha$ -carboline (2p)

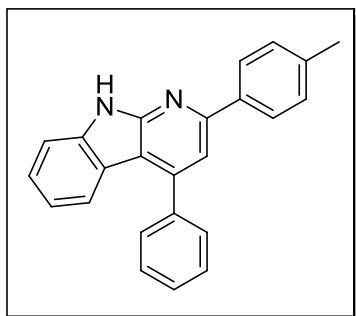

White solid, 60% yield; mp 252-254 °C;  $^1\text{H}$  NMR (400 MHz,  $(\text{CD}_3)_2\text{SO}$ )  $\delta$  12.05 (brs, 1H), 8.12 (d,  $J = 8.2$  Hz, 2H), 7.77-7.75 (m, 2H), 7.65-7.56 (m, 4H), 7.54-7.51 (m, 2H), 7.39 (t,  $J = 7.7$  Hz, 1H), 7.30 (d,  $J = 8.2$  Hz, 2H), 7.02 (t,  $J = 7.5$  Hz, 1H), 2.36 (s, 3H);  $^{13}\text{C}$  NMR (100MHz,  $(\text{CD}_3)_2\text{SO}$ )  $\delta$  153.6, 153.1, 145.5, 139.9, 139.2, 138.7, 136.9, 129.8, 129.3, 129.2, 129.1, 127.2, 126.8, 122.1, 120.4, 119.7, 113.0, 111.8, 111.6, 21.1; HRMS (ESI)  $m/z$  calcd. For  $\text{C}_{24}\text{H}_{19}\text{N}_2$  ( $M+1$ ) 335.1548, found 355.1548.

#### 2-(naphthalen-2-yl)-4-phenyl- $\alpha$ -carboline (2q)

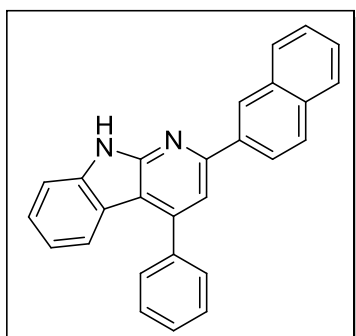

White solid, 73% yield; mp 276-277 °C;  $^1\text{H}$  NMR (400 MHz,  $(\text{CD}_3)_2\text{SO}$ )  $\delta$  12.14 (brs, 1H), 8.22 (s, 1H), 8.45 (dd,  $J = 8.6, 1.6$  Hz, 1H), 8.08-8.04 (m, 2H), 7.97-7.95 (m, 1H), 7.87 (s, 1H), 7.83-7.81 (m, 2H), 7.68-7.53 (m, 7H), 7.42 (t,  $J = 7.7$  Hz, 1H), 7.05 (t,  $J = 7.6$  Hz, 1H);  $^{13}\text{C}$  NMR (100MHz,  $(\text{CD}_3)_2\text{SO}$ )  $\delta$  153.3, 153.2, 145.7, 140.1, 139.2, 137.1, 133.7, 133.6, 129.3, 129.3, 129.1, 129.1, 128.6, 128.0, 127.0, 127.0, 126.9, 126.5, 125.2, 122.2, 120.4, 119.8, 113.7, 112.0, 111.9; HRMS (ESI)  $m/z$  calcd. For  $\text{C}_{27}\text{H}_{19}\text{N}_2$  ( $M+1$ ) 371.1548, found 371.1548.

#### 2-(4-methoxyphenyl)-4-phenyl- $\alpha$ -carboline (2r)

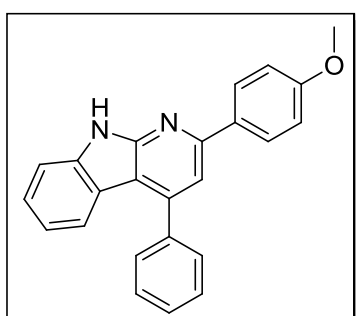

White solid, 54% yield; mp 236-237 °C;  $^1\text{H}$  NMR (400 MHz,  $\text{CDCl}_3$ )  $\delta$  11.63 (brs, 1H), 8.18 (d,  $J = 8.8$  Hz, 2H), 7.78-7.75 (m, 2H), 7.62-7.54 (m, 5H), 7.23-7.19 (m, 1H), 7.07 (d,  $J = 8.8$  Hz, 2H), 6.99 (t,  $J = 7.2$  Hz, 1H), 6.72 (d,  $J = 8.1$  Hz, 2H), 3.89 (s, 3H);  $^{13}\text{C}$  NMR (100MHz,  $\text{CDCl}_3$ )  $\delta$  160.7, 154.4, 153.4, 146.3, 139.6, 139.4, 133.0, 129.1, 128.9, 128.8, 126.4, 122.5, 121.1, 119.8, 114.7, 114.0, 112.5, 111.5, 55.7; HRMS (ESI)  $m/z$  calcd. For  $\text{C}_{24}\text{H}_{19}\text{N}_2\text{O}$  ( $M+1$ ) 351.1497, found 351.1497.

### 6-bromo-2,4-diphenyl- $\alpha$ -carboline (2s)

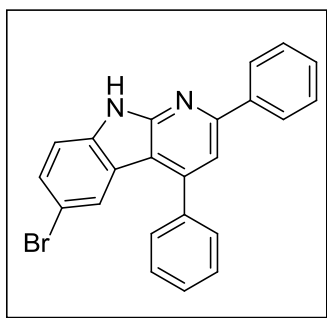

White solid, 82% yield; mp 259-260 °C;  $^1\text{H}$  NMR (400 MHz,  $(\text{CD}_3)_2\text{SO}$ )  $\delta$  12.28 (brs, 1H), 8.24 (d,  $J = 7.3$  Hz, 2H), 7.77 (d,  $J = 6.7$  Hz, 2H), 7.70-7.59 (m, 5H), 7.55-7.43 (m, 5H);  $^{13}\text{C}$  NMR (100MHz,  $(\text{CD}_3)_2\text{SO}$ )  $\delta$  154.5, 153.2, 146.1, 139.5, 138.7, 138.7, 129.5, 129.5, 129.4, 129.4, 129.2, 129.0, 127.5, 124.3, 122.2, 113.9, 113.7, 111.6, 110.9;

HRMS (ESI)  $m/z$  calcd. For  $\text{C}_{23}\text{H}_{16}\text{N}_2\text{Br}$  ( $M+1$ ) 399.0497, found 399.0497.

### 6-nitro-2,4-diphenyl- $\alpha$ -carboline (2t)

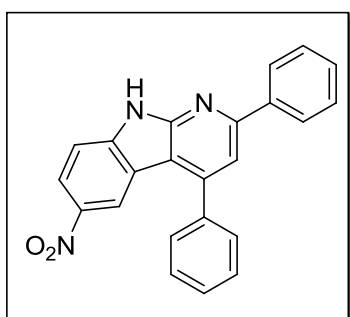

Pale yellow solid, 77% yield; mp 272-273 °C;  $^1\text{H}$  NMR (400 MHz,  $\text{CDCl}_3$ )  $\delta$  12.78 (brs, 1H), 8.60 (d,  $J = 2.1$  Hz, 1H), 8.22-8.20 (m, 2H), 8.06 (dd,  $J = 9.0, 2.2$  Hz, 1H), 7.78-7.76 (m, 2H), 7.69-7.59 (m, 7H), 6.28 (d,  $J = 9.0$  Hz, 1H);  $^{13}\text{C}$  NMR (100MHz,  $\text{CDCl}_3$ )  $\delta$  156.4, 154.6, 147.9, 143.0, 141.4, 139.8, 137.9, 129.9, 129.8, 129.7, 129.5, 128.6, 128.3,

122.3, 120.4, 119.2, 116.2, 113.3, 111.3; HRMS (ESI)  $m/z$  calcd. For  $\text{C}_{23}\text{H}_{16}\text{N}_3\text{O}_2$  ( $M+1$ ) 366.1243, found 366.1241.

### 6-methoxy-2,4-diphenyl- $\alpha$ -carboline (2u)

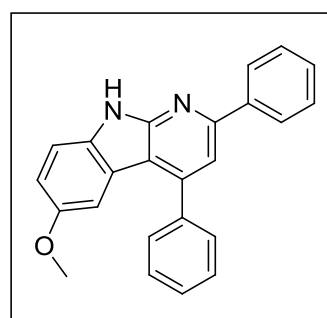

White solid, 65% yield; mp 201-202 °C;  $^1\text{H}$  NMR (400 MHz,  $\text{CDCl}_3$ )  $\delta$  12.06 (brs, 1H), 8.24 (d,  $J = 7.1$  Hz, 2H), 7.77 (d,  $J = 7.0$  Hz, 2H), 7.62-7.49 (m, 7H), 7.11 (d,  $J = 2.3$  Hz, 1H), 6.83 (dd,  $J = 8.8, 2.5$  Hz, 1H), 6.37 (d,  $J = 8.8$  Hz, 1H), 3.66 (s, 3H);  $^{13}\text{C}$  NMR (100MHz,  $\text{CDCl}_3$ )  $\delta$  154.4, 153.9, 153.6, 146.4, 140.4, 139.3, 134.5, 129.3, 128.9, 128.9, 128.9,

128.9, 128.3, 121.1, 115.4, 114.1, 113.1, 112.2, 105.7, 55.8; HRMS (ESI)  $m/z$  calcd. For  $\text{C}_{24}\text{H}_{19}\text{N}_2\text{O}$  ( $M+1$ ) 351.1497, found 351.1500.

## Synthesis of alkenyl oxime ester 4

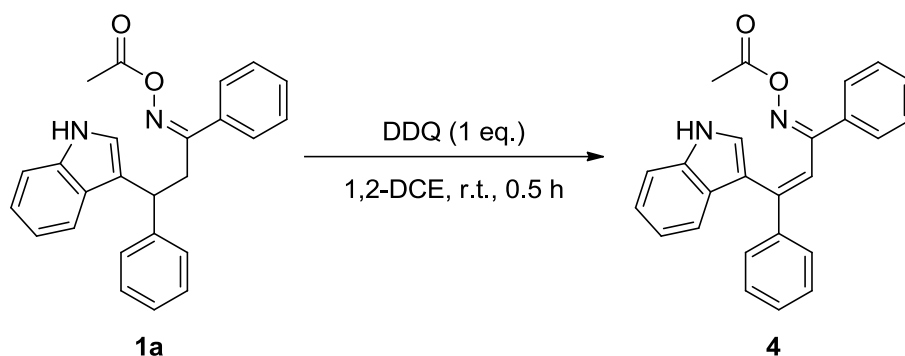

A mixture of indolyloxime ester **1a** (1 mmol) and 2,3-Dichloro-5,6-dicyano-1,4-benzoquinone (DDQ, 0.227g, 1 eq.) in 1,2-dichloroethane (1,2-DCE, 10 mL) was stirred at ambient temperature for 30 min. After completion of reaction, the mixture was diluted with CH<sub>2</sub>Cl<sub>2</sub> (20 mL). The organic layer was washed with aq. 1M NaOH (10 mL) for two times. The combined water layer was extracted with CH<sub>2</sub>Cl<sub>2</sub> (20 mL) for three times. The combined organic layer was dried over MgSO<sub>4</sub> and concentrated under reduced pressure. The residue was purified by recrystallation from CH<sub>2</sub>Cl<sub>2</sub>/hexane as solvent to afford alkenyl oxime ester **4**.

### (1Z,2Z)-3-(1H-indol-3-yl)-1,3-diphenylprop-2-en-1-one O-acetyl oxime (**4**)

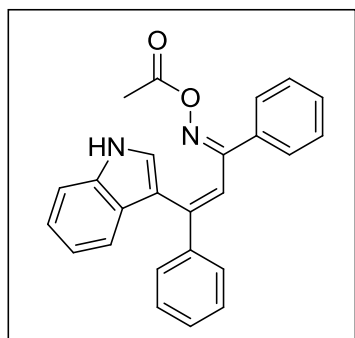

Brown solid, 90% yield; two isomers 10:1; mp 106-108 °C; <sup>1</sup>H NMR (400 MHz, CDCl<sub>3</sub>) δ 8.64 (brs, 1H), 7.78 (d, *J* = 7.9 Hz, 1H), 7.49 (d, *J* = 7.2 Hz, 2H), 7.44 (d, *J* = 7.9 Hz, 1H), 7.28-7.26 (m, 1H), 7.22 (t, *J* = 7.5 Hz, 2H), 7.17-7.03 (m, 9H), 6.96 (d, *J* = 2.7 Hz, 1H), 2.17 (s, 3H); <sup>13</sup>C NMR (100 MHz, CDCl<sub>3</sub>) δ 169.3, 164.1, 146.7, 140.2, 137.2, 134.6, 130.1, 129.8, 128.9, 128.5, 127.9, 127.9, 127.6, 125.9, 123.1, 121.2, 120.7, 118.8, 114.9, 112.1, 77.5; HRMS (ESI) *m/z* calcd. For C<sub>25</sub>H<sub>20</sub>N<sub>2</sub>O<sub>2</sub>Na (M+23) 403.1422, found 403.1423.

### Control experiment of $\alpha$ -carboline

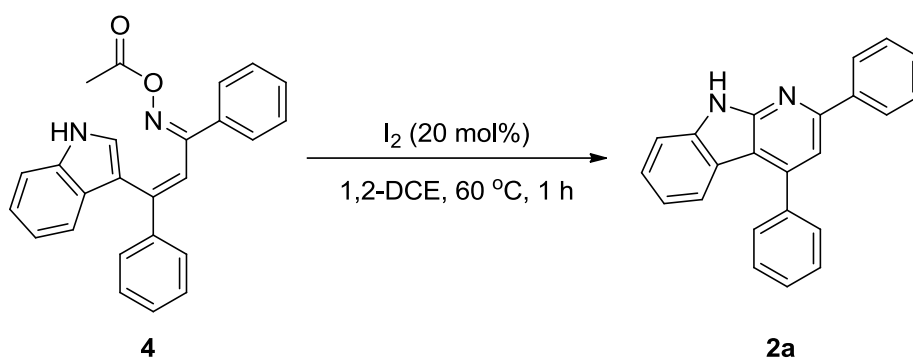

General procedure:

A mixture of alkenyl oxime ester **4** (0.5 mmol) and iodine (0.025g, 20 mol%) in 1,2-DCE (5 mL) was heated to 60 °C for 1 h. After completion of the reaction, the mixture was allowed to cool to ambient temperature and diluted with ethyl acetate (25 mL). The organic layer was washed with aq.  $Na_2S_2O_3$  (5 mL) and aq.  $NaHCO_3$  (5 mL) for two times. The organic layer was dried over  $MgSO_4$  and concentrated under reduced pressure to afford  $\alpha$ -carboline **2a** in 65% yield which were determined from crude  $^1H$  NMR spectrum with dibromomethane 10( $\mu$ L) as internal standard.

## X-ray data of carbolines 2r/3g and intermediate 4

Table S4. Crystal data and structure refinement for **2r** (CCDC number: 1515102)

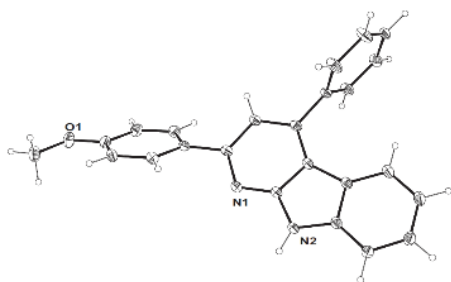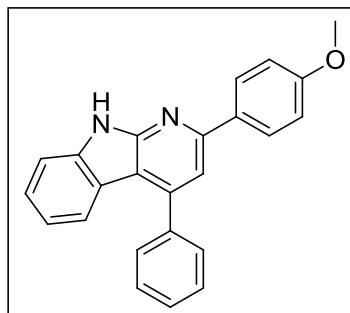

|                                   |                                                  |                 |
|-----------------------------------|--------------------------------------------------|-----------------|
| Identification code               | d18452                                           |                 |
| Empirical formula                 | C <sub>24</sub> H <sub>18</sub> N <sub>2</sub> O |                 |
| Formula weight                    | 350.40                                           |                 |
| Temperature                       | 200(2) K                                         |                 |
| Wavelength                        | 0.71073 Å                                        |                 |
| Crystal system                    | Triclinic                                        |                 |
| Space group                       | P -1                                             |                 |
| Unit cell dimensions              | a = 9.4800(12) Å                                 | α = 88.685(4)°. |
|                                   | b = 13.2295(16) Å                                | β = 73.346(4)°. |
|                                   | c = 15.0067(19) Å                                | γ = 86.478(4)°. |
| Volume                            | 1799.7(4) Å <sup>3</sup>                         |                 |
| Z                                 | 4                                                |                 |
| Density (calculated)              | 1.293 Mg/m <sup>3</sup>                          |                 |
| Absorption coefficient            | 0.080 mm <sup>-1</sup>                           |                 |
| F(000)                            | 736                                              |                 |
| Crystal size                      | 0.47 x 0.25 x 0.06 mm <sup>3</sup>               |                 |
| Theta range for data collection   | 2.25 to 25.03°.                                  |                 |
| Index ranges                      | -11 ≤ h ≤ 11, -15 ≤ k ≤ 15, -17 ≤ l ≤ 17         |                 |
| Reflections collected             | 62260                                            |                 |
| Independent reflections           | 6332 [R(int) = 0.0483]                           |                 |
| Completeness to theta = 25.03°    | 99.5 %                                           |                 |
| Absorption correction             | multi-scan                                       |                 |
| Max. and min. transmission        | 0.9952 and 0.9635                                |                 |
| Refinement method                 | Full-matrix least-squares on F <sup>2</sup>      |                 |
| Data / restraints / parameters    | 6332 / 0 / 489                                   |                 |
| Goodness-of-fit on F <sup>2</sup> | 1.084                                            |                 |
| Final R indices [I > 2σ(I)]       | R1 = 0.0374, wR2 = 0.0892                        |                 |
| R indices (all data)              | R1 = 0.0530, wR2 = 0.1040                        |                 |
| Largest diff. peak and hole       | 0.169 and -0.190 e.Å <sup>-3</sup>               |                 |

Table S5. Crystal data and structure refinement for **3g** (CCDC number: 1515101)

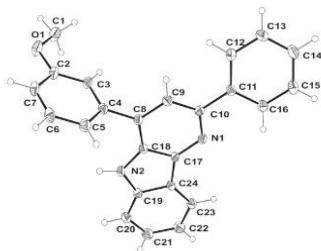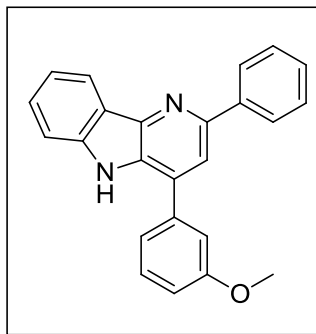

|                                   |                                                  |                 |
|-----------------------------------|--------------------------------------------------|-----------------|
| Identification code               | ch15606a                                         |                 |
| Empirical formula                 | C <sub>24</sub> H <sub>18</sub> N <sub>2</sub> O |                 |
| Formula weight                    | 350.40                                           |                 |
| Temperature                       | 200(2) K                                         |                 |
| Wavelength                        | 0.71073 Å                                        |                 |
| Crystal system                    | Monoclinic                                       |                 |
| Space group                       | P 21/n                                           |                 |
| Unit cell dimensions              | a = 13.365(2) Å                                  | α = 90°.        |
|                                   | b = 17.037(3) Å                                  | β = 98.932(3)°. |
|                                   | c = 16.781(3) Å                                  | γ = 90°.        |
| Volume                            | 3774.6(10) Å <sup>3</sup>                        |                 |
| Z                                 | 8                                                |                 |
| Density (calculated)              | 1.233 Mg/m <sup>3</sup>                          |                 |
| Absorption coefficient            | 0.076 mm <sup>-1</sup>                           |                 |
| F(000)                            | 1472                                             |                 |
| Crystal size                      | 0.34 x 0.26 x 0.21 mm <sup>3</sup>               |                 |
| Theta range for data collection   | 1.71 to 25.09°.                                  |                 |
| Index ranges                      | -15 ≤ h ≤ 15, -20 ≤ k ≤ 19, -19 ≤ l ≤ 19         |                 |
| Reflections collected             | 23348                                            |                 |
| Independent reflections           | 6606 [R(int) = 0.0456]                           |                 |
| Completeness to theta = 25.09°    | 98.6 %                                           |                 |
| Absorption correction             | multi-scan                                       |                 |
| Max. and min. transmission        | 0.9842 and 0.9746                                |                 |
| Refinement method                 | Full-matrix least-squares on F <sup>2</sup>      |                 |
| Data / restraints / parameters    | 6606 / 0 / 487                                   |                 |
| Goodness-of-fit on F <sup>2</sup> | 1.058                                            |                 |
| Final R indices [I > 2σ(I)]       | R1 = 0.0505, wR2 = 0.1344                        |                 |
| R indices (all data)              | R1 = 0.0789, wR2 = 0.1512                        |                 |
| Largest diff. peak and hole       | 0.368 and -0.379 e.Å <sup>-3</sup>               |                 |



Table S6. Crystal data and structure refinement for **4** (CCDC number: 1515742)

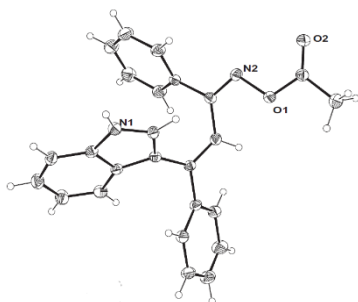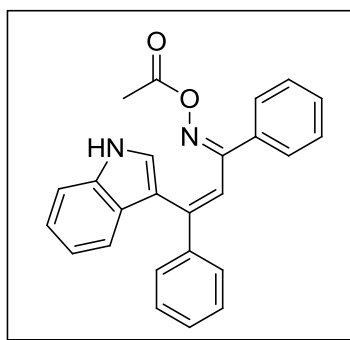

|                                   |                                                                   |                 |
|-----------------------------------|-------------------------------------------------------------------|-----------------|
| Identification code               | ch18179                                                           |                 |
| Empirical formula                 | C <sub>25</sub> H <sub>20</sub> ClO N <sub>2</sub> O <sub>2</sub> |                 |
| Formula weight                    | 380.43                                                            |                 |
| Temperature                       | 200(2) K                                                          |                 |
| Wavelength                        | 0.71073 Å                                                         |                 |
| Crystal system                    | Triclinic                                                         |                 |
| Space group                       | P -1                                                              |                 |
| Unit cell dimensions              | a = 8.2571(7) Å                                                   | α = 66.416(5)°. |
|                                   | b = 16.8590(15) Å                                                 | β = 86.395(5)°. |
|                                   | c = 17.1654(15) Å                                                 | γ = 89.790(5)°. |
| Volume                            | 2185.0(3) Å <sup>3</sup>                                          |                 |
| Z                                 | 4                                                                 |                 |
| Density (calculated)              | 1.156 Mg/m <sup>3</sup>                                           |                 |
| Absorption coefficient            | 0.074 mm <sup>-1</sup>                                            |                 |
| F(000)                            | 800                                                               |                 |
| Crystal size                      | 0.39 x 0.35 x 0.11 mm <sup>3</sup>                                |                 |
| Theta range for data collection   | 1.32 to 25.46°.                                                   |                 |
| Index ranges                      | -9 ≤ h ≤ 9, -20 ≤ k ≤ 19, -20 ≤ l ≤ 18                            |                 |
| Reflections collected             | 19218                                                             |                 |
| Independent reflections           | 7965 [R(int) = 0.0512]                                            |                 |
| Completeness to theta = 25.46°    | 98.4 %                                                            |                 |
| Absorption correction             | multi-scan                                                        |                 |
| Max. and min. transmission        | 0.9919 and 0.9717                                                 |                 |
| Refinement method                 | Full-matrix least-squares on F <sup>2</sup>                       |                 |
| Data / restraints / parameters    | 7965 / 0 / 523                                                    |                 |
| Goodness-of-fit on F <sup>2</sup> | 1.064                                                             |                 |
| Final R indices [I > 2σ(I)]       | R1 = 0.0921, wR2 = 0.2654                                         |                 |
| R indices (all data)              | R1 = 0.1235, wR2 = 0.2855                                         |                 |
| Largest diff. peak and hole       | 0.495 and -0.379 e.Å <sup>-3</sup>                                |                 |

(Z)-3-(1H-indol-3-yl)-1,3-diphenylpropan-1-one O-acetyl oxime

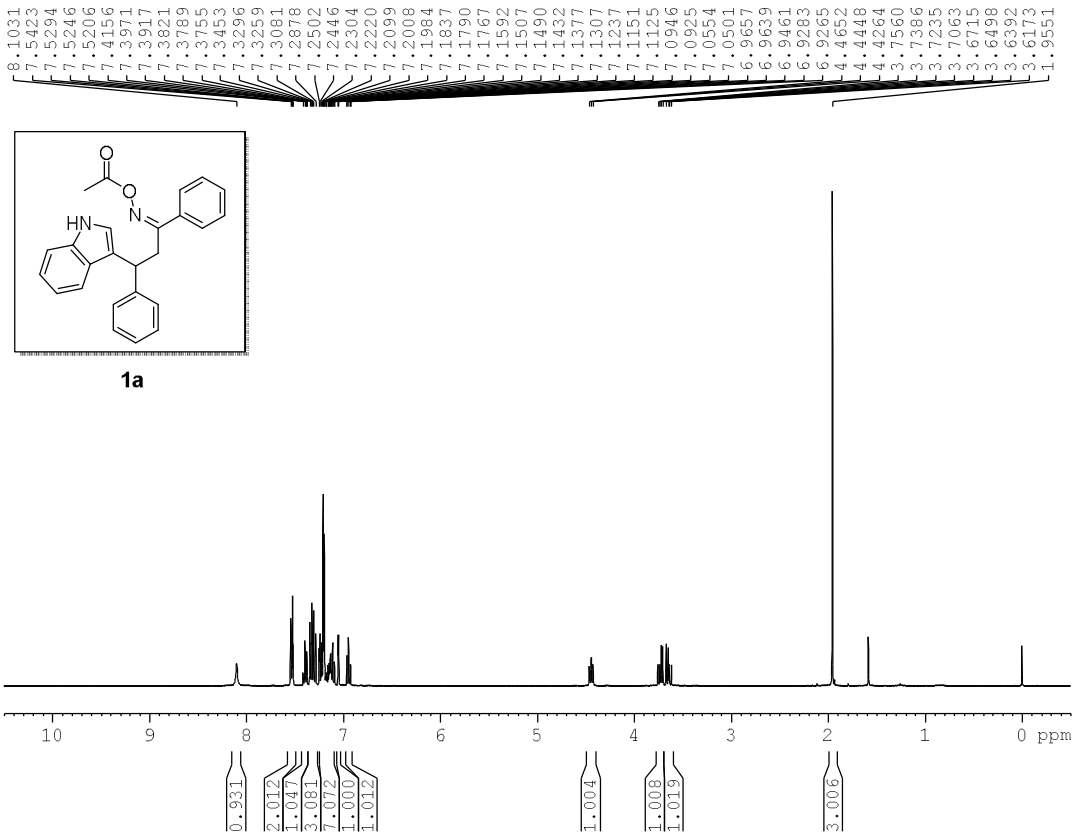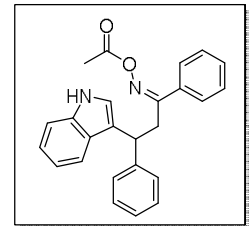

1a

Current Data Parameters  
 NAME 20161224  
 EXPNO 1  
 PROCNO 1

F2 - Acquisition Parameters  
 Date\_ 20161224  
 Time 19.17  
 INSTRUM spect  
 PROBHD 5 mm PABBO BB/  
 PULPROG zg30  
 TD 32768  
 SOLVENT CDCl3  
 NS 16  
 DS 0  
 SWH 7211.539 Hz  
 FIDRES 0.220079 Hz  
 AQ 2.2719147 sec  
 RG 39.72  
 DW 69.333 usec  
 DE 10.50 usec  
 TE 298.0 K  
 D1 2.00000000 sec  
 TDO

==== CHANNEL f1 =====  
 SFO1 400.1324009 MHz  
 NUC1 1H  
 P1 12.90 usec  
 PLW1 15.00000000 W

F2 - Processing parameters  
 SI 16384  
 SF 400.1300160 MHz  
 WDW EM  
 SSB 0  
 LB 0 Hz  
 GB 0  
 PC 1.00

(Z)-3-(1H-indol-3-yl)-1,3-diphenylpropan-1-one O-acetyl oxime

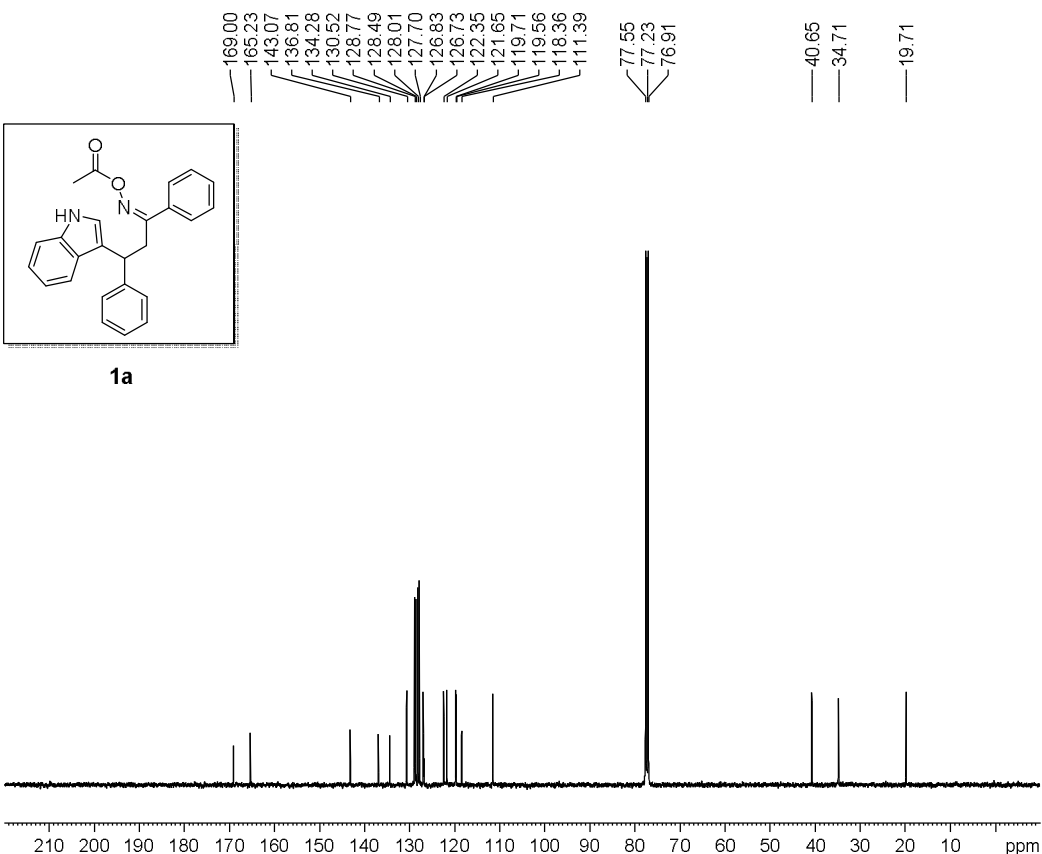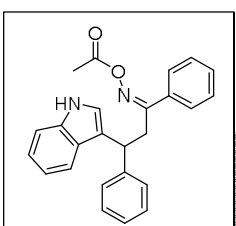

1a

Current Data Parameters  
 NAME 20161224  
 EXPNO 2  
 PROCNO 1

F2 - Acquisition Parameters  
 Date\_ 20161224  
 Time 19.19  
 INSTRUM spect  
 PROBHD 5 mm PABBO BB/  
 PULPROG zgpg30  
 TD 32768  
 SOLVENT CDCl3  
 NS 1037  
 DS 0  
 SWH 24038.461 Hz  
 FIDRES 0.733596 Hz  
 AQ 0.6815744 sec  
 RG 198.09  
 DW 20.900 usec  
 DE 6.50 usec  
 TE 298.5 K  
 D1 2.00000000 sec  
 D11 0.03000000 sec  
 TDO 1

==== CHANNEL f1 =====  
 SFO1 100.6228298 MHz  
 NUC1 13C  
 P1 10.00 usec  
 PLW1 47.50000000 W

==== CHANNEL f2 =====  
 SFO2 400.1316005 MHz  
 NUC2 1H  
 CPDPRG2 waltz16  
 PCPD2 90.00 usec  
 PLW2 15.00000000 W  
 PLW12 0.33750001 W  
 PLW13 0.27338001 W

F2 - Processing parameters  
 SI 32768  
 SF 100.6127500 MHz  
 WDW EM  
 SSB 0  
 LB 2.00 Hz  
 GB 0  
 PC 1.00

(Z)-3-(2-fluorophenyl)-3-(1H-indol-3-yl)-1-phenylpropan-1-one O-acetyl oxime

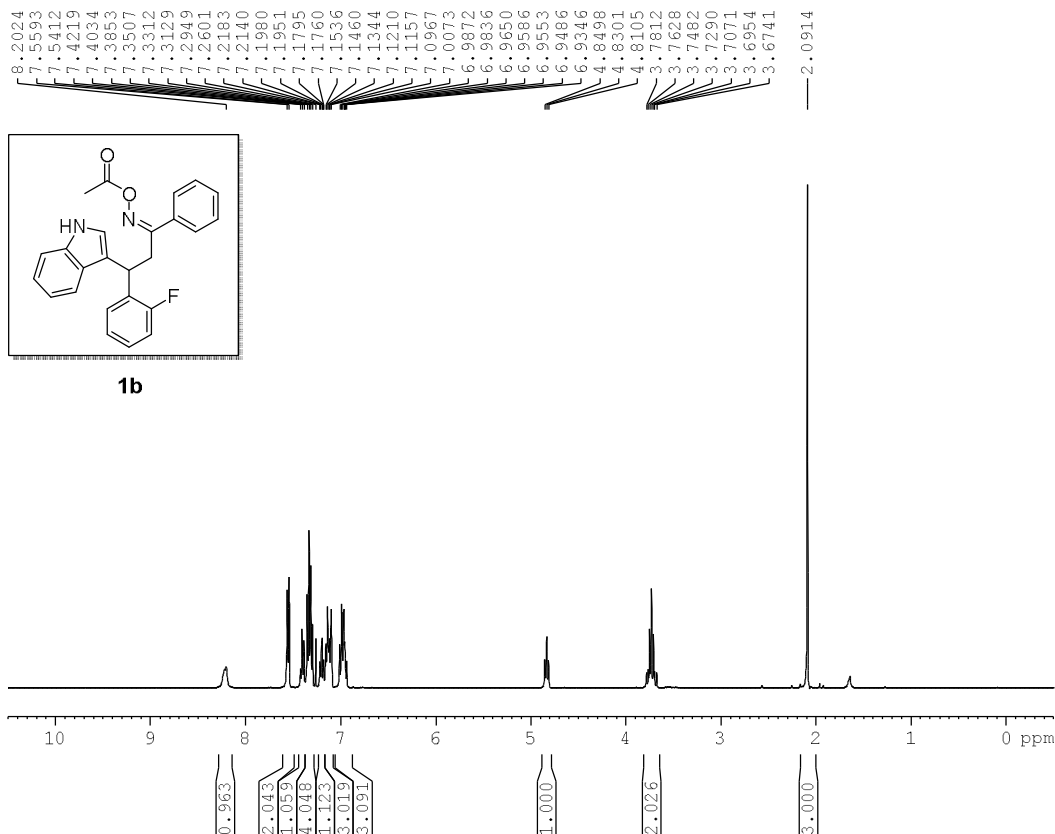

Current Data Parameters  
 NAME B(2-F chalcone)  
 EXPNO 51  
 PROCNO 1

F2 - Acquisition Parameters  
 Date\_ 20140303  
 Time 20.19  
 INSTRUM spect  
 PROBHD 5 mm BBO BB-1H  
 PULPROG zg30  
 TD 32768  
 SOLVENT CDCl3  
 NS 16  
 DS 0  
 SWH 7246.377 Hz  
 FIDRES 0.221142 Hz  
 AQ 2.2609921 sec  
 RG 114  
 DW 69.000 usec  
 DE 6.50 usec  
 TE 295.7 K  
 D1 2.0000000 sec  
 TDO 1

===== CHANNEL f1 =====  
 NUC1 1H  
 P1 14.35 usec  
 PL1 -2.00 dB  
 SFO1 400.1324008 MHz

F2 - Processing parameters  
 SI 16384  
 SF 400.1300091 MHz  
 WDW EM  
 SSB 0  
 LB 0 Hz  
 GB 0  
 PC 1.00

(Z)-3-(2-fluorophenyl)-3-(1H-indol-3-yl)-1-phenylpropan-1-one O-acetyl oxime

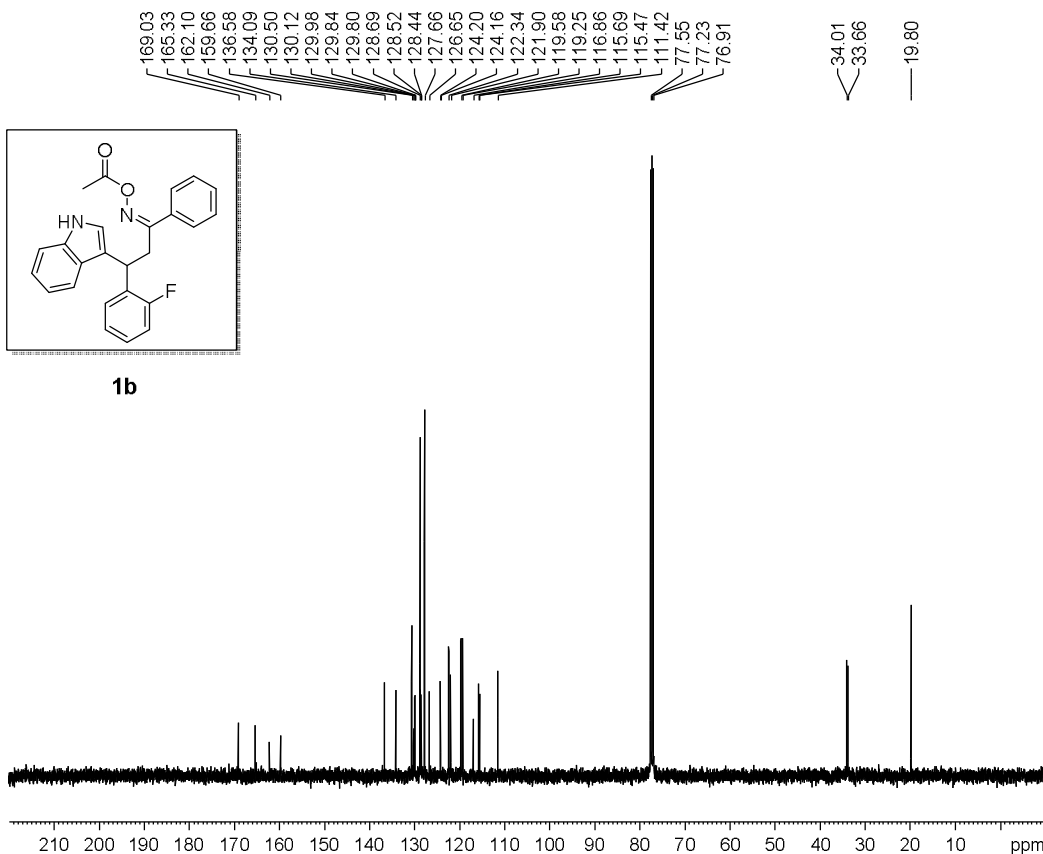

Current Data Parameters  
 NAME B(2-F chalcone)  
 EXPNO 513  
 PROCNO 1

F2 - Acquisition Parameters  
 Date\_ 20140303  
 Time 20.23  
 INSTRUM spect  
 PROBHD 5 mm BBO BB-1H  
 PULPROG zgpg30  
 TD 32768  
 SOLVENT CDCl3  
 NS 246  
 DS 0  
 SWH 24038.461 Hz  
 FIDRES 0.733596 Hz  
 AQ 0.6815744 sec  
 RG 8192  
 DW 20.800 usec  
 DE 6.50 usec  
 TE 296.0 K  
 D1 2.0000000 sec  
 D11 0.03000000 sec  
 TDO 1

===== CHANNEL f1 =====  
 NUC1 13C  
 P1 9.40 usec  
 PL1 7.00 dB  
 SFO1 100.6233325 MHz

===== CHANNEL f2 =====  
 CPDPRG2 waltz16  
 NUC2 1H  
 PCPD2 90.00 usec  
 PL2 -2.00 dB  
 PL12 13.95 dB  
 PL13 17.00 dB  
 SFO2 400.1316005 MHz

F2 - Processing parameters  
 SI 32768  
 SF 100.6127535 MHz  
 WDW EM  
 SSB 0  
 LB 1.00 Hz  
 GB 0  
 PC 1.00

(Z)-3-(2-chlorophenyl)-3-(1H-indol-3-yl)-1-phenylpropan-1-one O-acetyl oxime

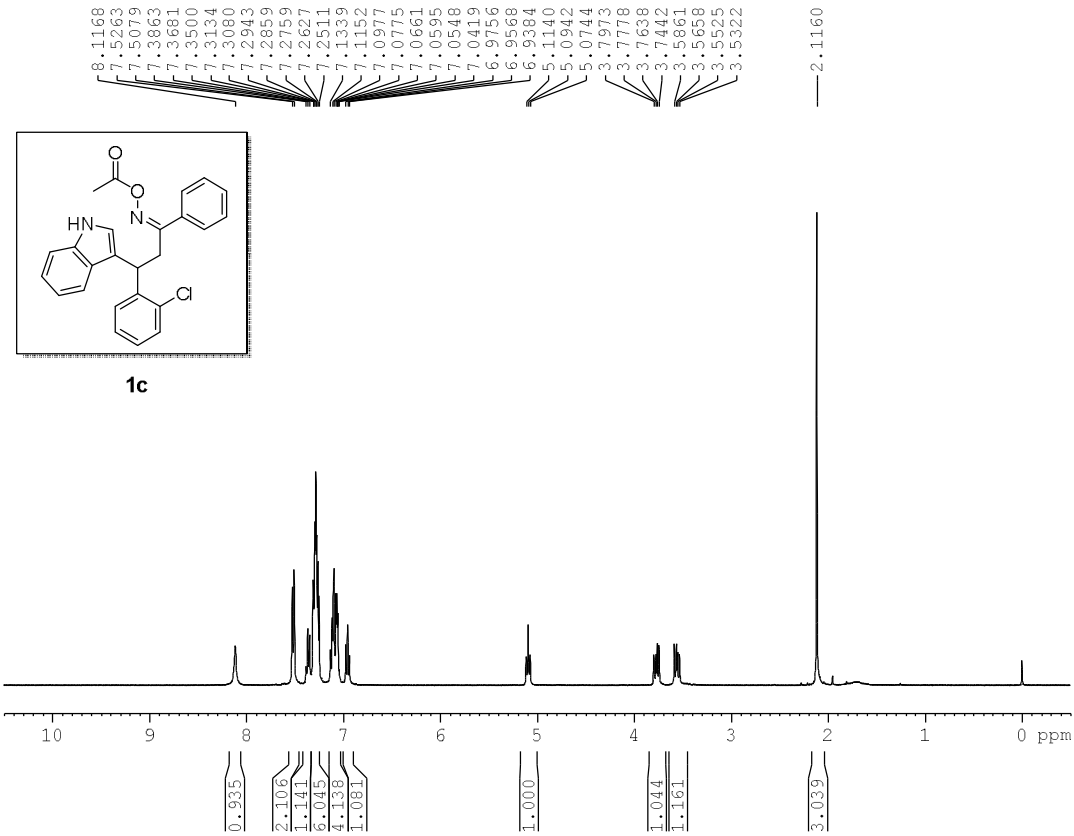

Current Data Parameters  
NAME 20161227  
EXPNO 2  
PROCNO 1

F2 - Acquisition Parameters  
Date\_ 20161227  
Time 16:05  
INSTRUM spect  
PROBHD 5 mm BBO BB-1H  
PULPROG zg30  
TD 32768  
SOLVENT CDCl3  
NS 16  
DS 0  
SWH 7246.377 Hz  
FIDRES 0.221142 Hz  
AQ 2.2609921 sec  
RG 114  
DW 69.000 usec  
DE 6.50 usec  
TE 298.7 K  
D1 2.0000000 sec  
TD0

===== CHANNEL f1 =====  
NUC1 14.40 usec  
PL1 1.80 dB  
SFO1 400.1324008 MHz

F2 - Processing parameters  
SI 16584  
SF 400.1300130 MHz  
EM  
WDW 0  
SSB 0  
LB 0 Hz  
GB 0  
PC 1.00

(Z)-3-(2-chlorophenyl)-3-(1H-indol-3-yl)-1-phenylpropan-1-one O-acetyl oxime

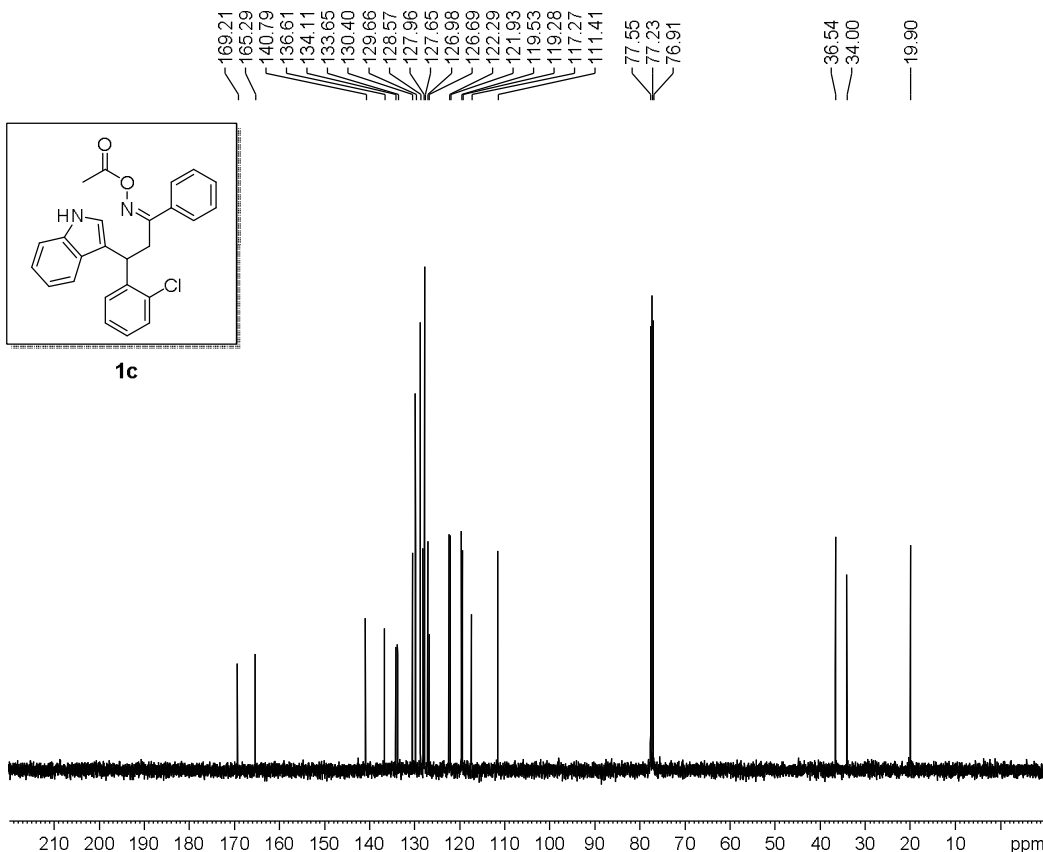

Current Data Parameters  
NAME C(2-Cl chalcone)  
EXPNO 513  
PROCNO 1

F2 - Acquisition Parameters  
Date\_ 20130208  
Time 19:01  
INSTRUM spect  
PROBHD 5 mm BBO BB-1H  
PULPROG zgpg30  
TD 32768  
SOLVENT CDCl3  
NS 100  
DS 0  
SWH 24038.461 Hz  
FIDRES 0.733596 Hz  
AQ 0.6815744 sec  
RG 2048  
DW 20.800 usec  
DE 6.50 usec  
TE 301.0 K  
D1 2.0000000 sec  
D11 0.0300000 sec  
TD0 1

===== CHANNEL f1 =====  
NUC1 13C  
P1 9.40 usec  
PL1 7.00 dB  
SFO1 100.6233325 MHz

===== CHANNEL f2 =====  
CPDPRG2 waltz16  
NUC2 1H  
PCPD2 90.00 usec  
PL2 3.00 dB  
PL12 23.70 dB  
PL13 23.70 dB  
SFO2 400.1316005 MHz

F2 - Processing parameters  
SI 32768  
SF 100.6127579 MHz  
EM  
WDW 0  
SSB 0  
LB 1.00 Hz  
GB 0  
PC 1.00

(Z)-3-(2-bromophenyl)-3-(1H-indol-3-yl)-1-phenylpropan-1-one O-acetyl oxime

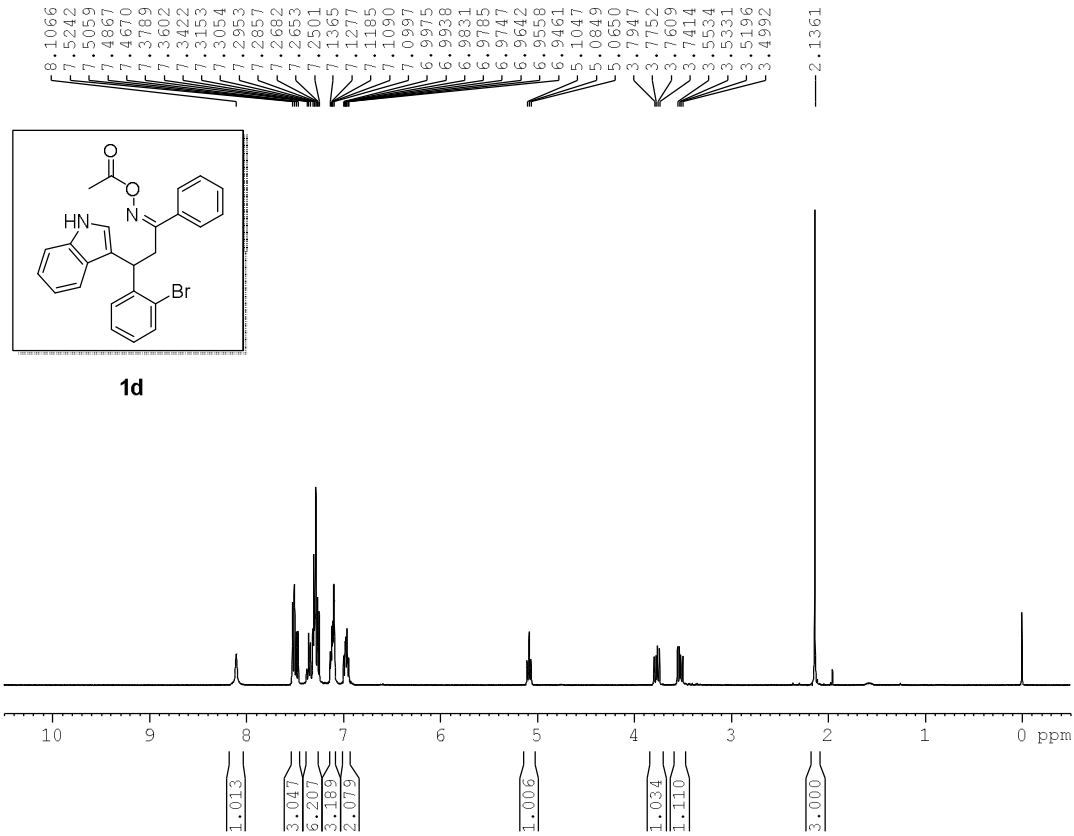

Current Data Parameters  
 NAME 20161223  
 EXPNO 1  
 PROCNO 1

F2 - Acquisition Parameters  
 Date\_ 20161223  
 Time 19.37  
 INSTRUM spect  
 PROBHD 5 mm BBO BB-1H  
 PULPROG zg30  
 TD 32768  
 SOLVENT CDCl3  
 NS 16  
 DS 0  
 SWH 7246.377 Hz  
 FIDRES 0.221142 Hz  
 AQ 2.2609921 sec  
 RG 114  
 DW 69.000 usec  
 DE 6.50 usec  
 TE 298.6 K  
 D1 2.0000000 sec  
 TDO

===== CHANNEL f1 =====  
 NUC1 1H  
 P1 14.40 usec  
 PL1 1.80 dB  
 SFO1 400.1324008 MHz

F2 - Processing parameters  
 SI 16584  
 SF 400.1300133 MHz  
 WDW EM  
 SSB 0  
 LB 0 Hz  
 GB 0  
 PC 1.00

(Z)-3-(2-bromophenyl)-3-(1H-indol-3-yl)-1-phenylpropan-1-one O-acetyl oxime

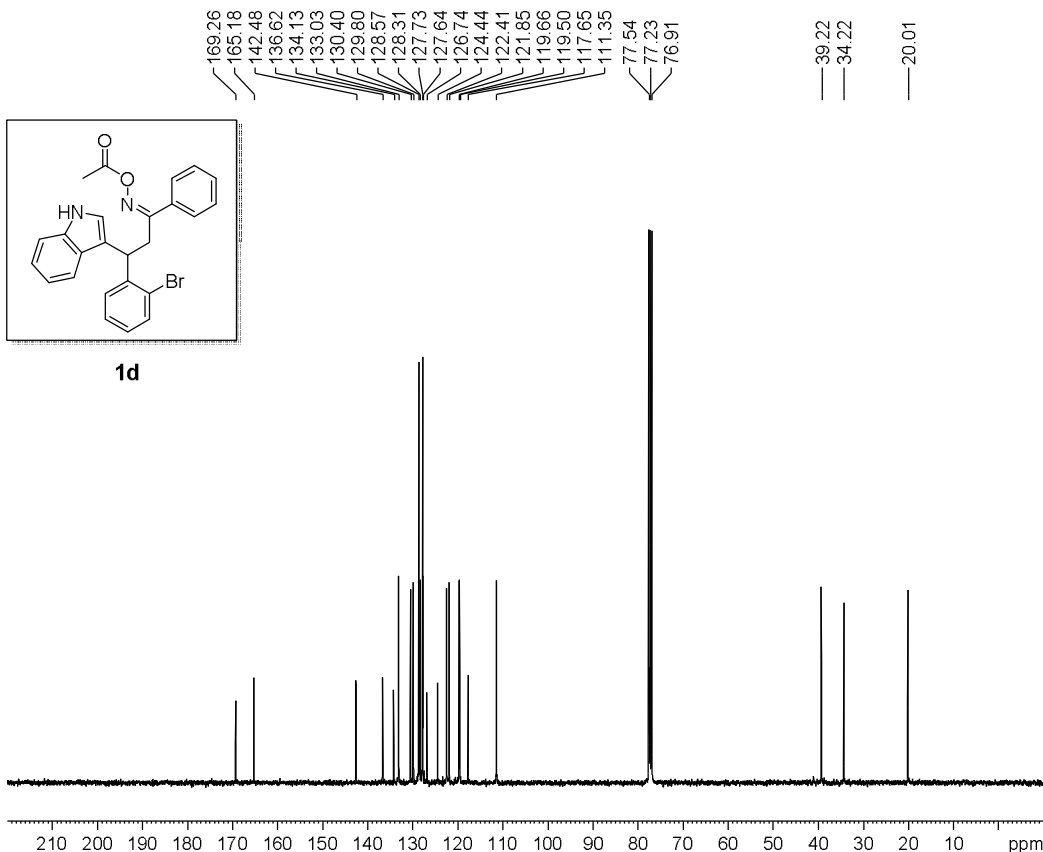

Current Data Parameters  
 NAME D(2-Br chalcone)  
 EXPNO 513  
 PROCNO 1

F2 - Acquisition Parameters  
 Date\_ 20140323  
 Time 19.16  
 INSTRUM spect  
 PROBHD 5 mm PABBO BB/  
 PULPROG zgpg30  
 TD 32768  
 SOLVENT CDCl3  
 NS 1000  
 DS 0  
 SWH 24038.461 Hz  
 FIDRES 0.733596 Hz  
 AQ 0.6815744 sec  
 RG 198.09  
 DW 20.900 usec  
 DE 6.50 usec  
 TE 298.1 K  
 D1 2.0000000 sec  
 D11 0.0300000 sec  
 TDO 1

===== CHANNEL f1 =====  
 SFO1 100.6233324 MHz  
 NUC1 13C  
 P1 10.00 usec  
 PLW1 46.0000000 W

===== CHANNEL f2 =====  
 SFO2 400.1316005 MHz  
 NUC2 1H  
 CPDPRG2 waltz16  
 PCPD2 90.00 usec  
 PLW2 15.0000000 W  
 PLW12 0.34252000 W  
 PLW13 0.27744001 W

F2 - Processing parameters  
 SI 32768  
 SF 100.6127526 MHz  
 WDW EM  
 SSB 0  
 LB 2.00 Hz  
 GB 0  
 PC 1.00

(Z)-3-(1H-indol-3-yl)-3-(naphthalen-1-yl)-1-phenylpropan-1-one O-acetyl oxim

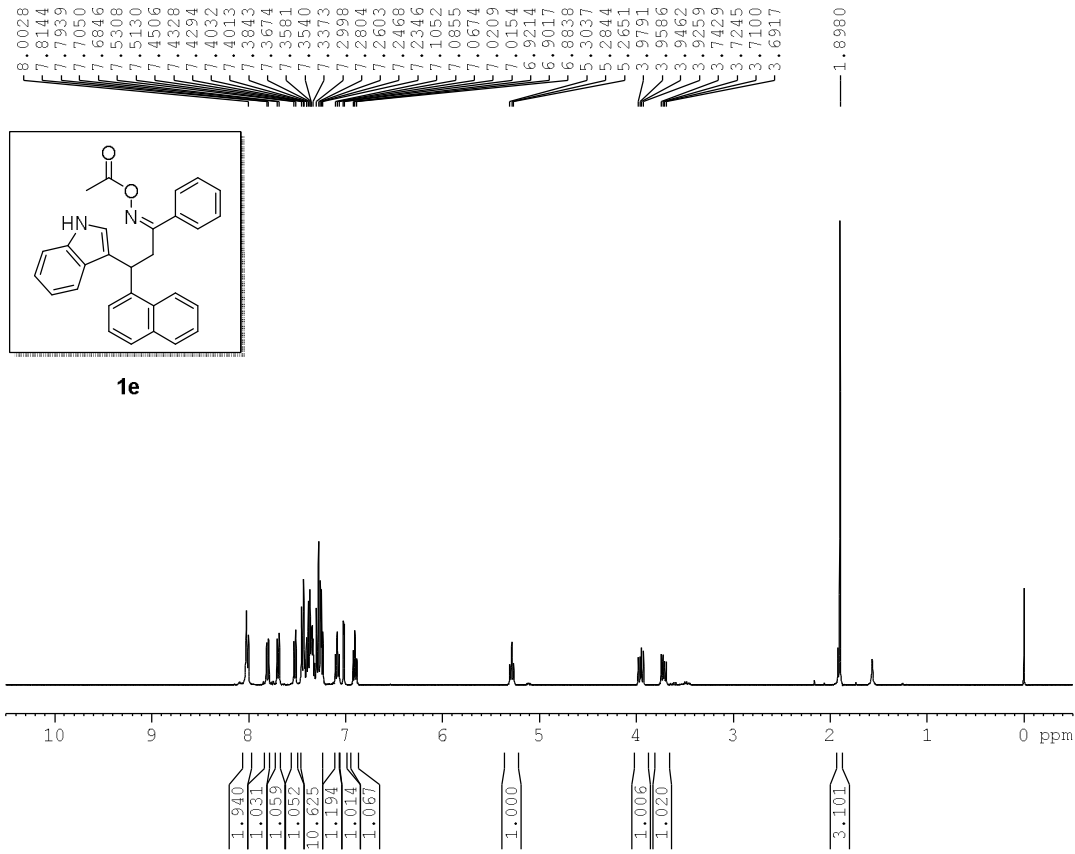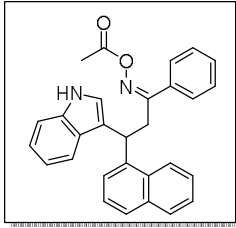

1e

Current Data Parameters  
 NAME 20161224  
 EXPNO 2  
 PROCNO 1

F2 - Acquisition Parameters  
 Date\_ 20161224  
 Time 18.26  
 INSTRUM spect  
 PROBHD 5 mm BBO BB-1H  
 PULPROG zg30  
 TD 32768  
 SOLVENT CDCl3  
 NS 16  
 DS 0  
 SWH 7246.377 Hz  
 FIDRES 0.221142 Hz  
 AQ 2.2609921 sec  
 RG 114  
 DW 69.000 usec  
 DE 6.50 usec  
 TE 298.7 K  
 D1 2.00000000 sec  
 TDO

===== CHANNEL f1 =====  
 NUC1 1H  
 P1 14.40 usec  
 PL1 1.80 dB  
 SFO1 400.1324008 MHz

F2 - Processing parameters  
 SI 16384  
 SF 400.1300144 MHz  
 WDW EM  
 SSB 0  
 LB 0 Hz  
 GB 0  
 PC 1.00

(Z)-3-(1H-indol-3-yl)-3-(naphthalen-1-yl)-1-phenylpropan-1-one O-acetyl oxim

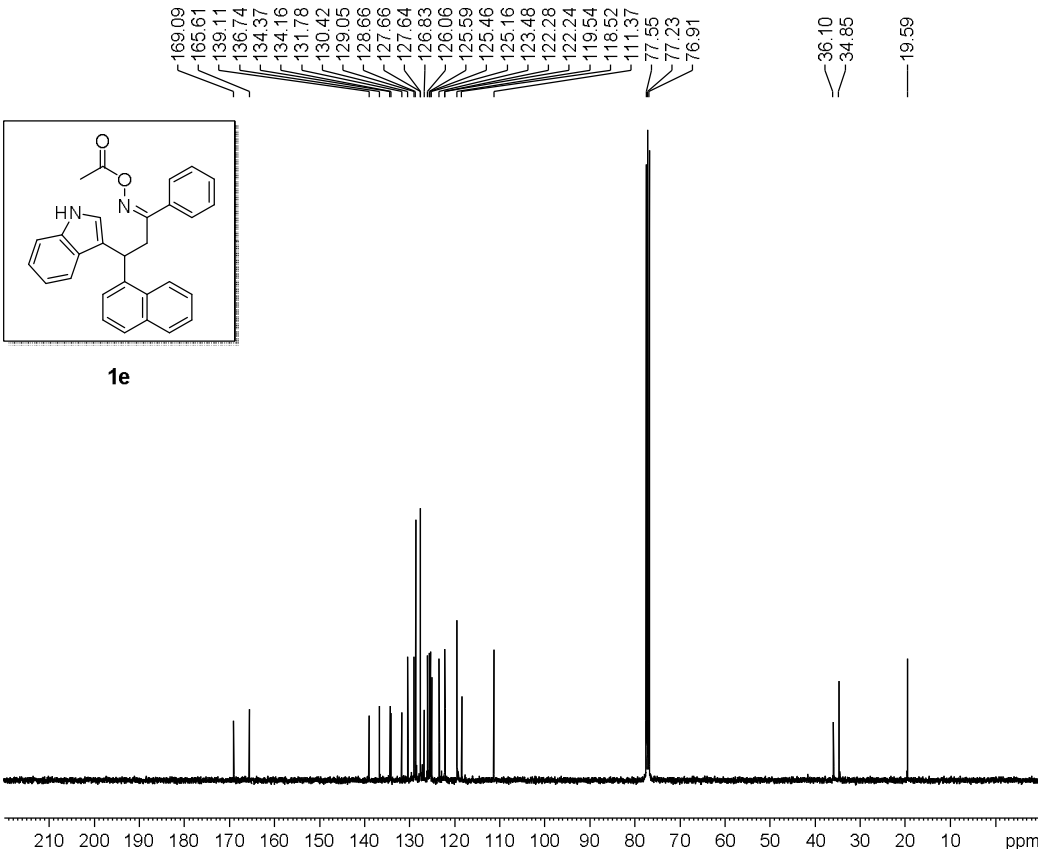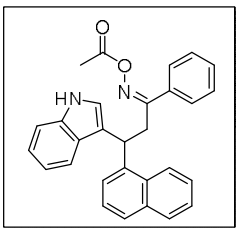

1e

Current Data Parameters  
 NAME E(1-naphthyl chalcone)  
 EXPNO 513  
 PROCNO 1

F2 - Acquisition Parameters  
 Date\_ 20140331  
 Time 2.12  
 INSTRUM spect  
 PROBHD 5 mm BBO BB-1H  
 PULPROG zgpg30  
 TD 32768  
 SOLVENT CDCl3  
 NS 1500  
 DS 0  
 SWH 24038.461 Hz  
 FIDRES 0.733596 Hz  
 AQ 0.6815744 sec  
 RG 8192  
 DW 20.800 usec  
 DE 6.50 usec  
 TE 300.4 K  
 D1 2.00000000 sec  
 D11 0.03000000 sec  
 TDO 1

===== CHANNEL f1 =====  
 NUC1 13C  
 P1 9.40 usec  
 PL1 7.00 dB  
 SFO1 100.6233325 MHz

===== CHANNEL f2 =====  
 CPDPRG2 waltz16  
 NUC2 1H  
 PCPD2 90.00 usec  
 PL2 -2.00 dB  
 PL12 13.95 dB  
 PL13 17.00 dB  
 SFO2 400.1316005 MHz

F2 - Processing parameters  
 SI 32768  
 SF 100.6127660 MHz  
 WDW EM  
 SSB 0  
 LB 1.00 Hz  
 GB 0  
 PC 1.00

(Z)-3-(1H-indol-3-yl)-3-(2-nitrophenyl)-1-phenylpropan-1-one O-acetyl oxime

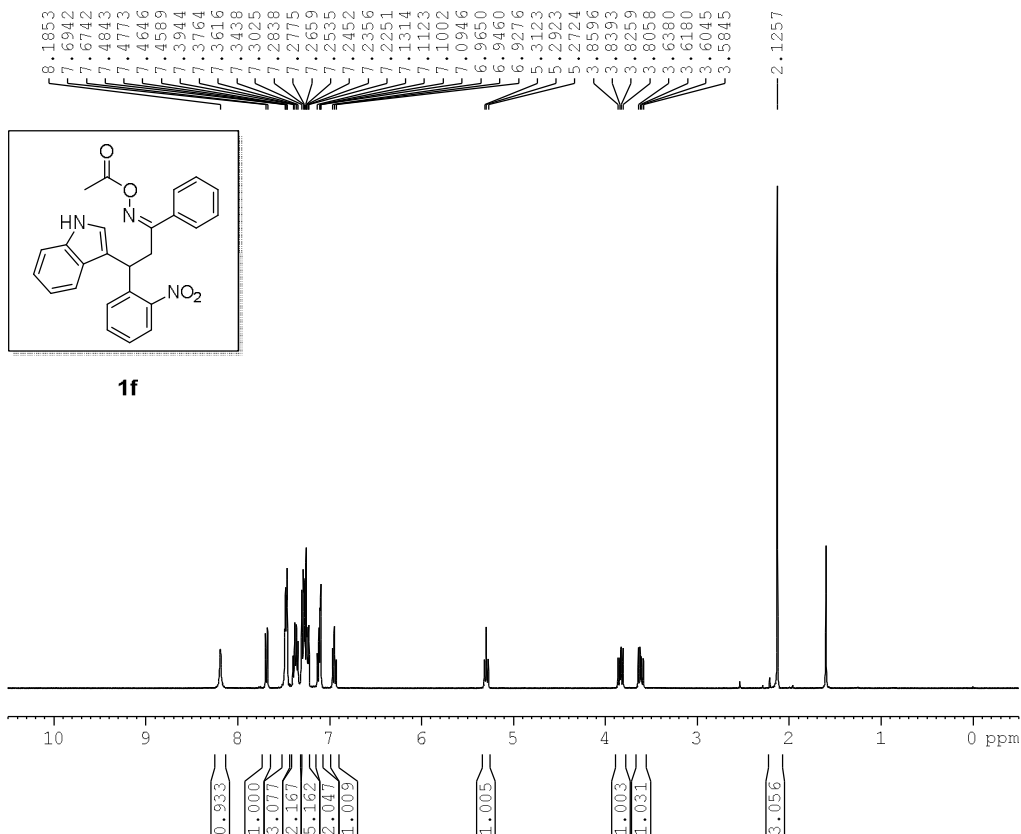

Current Data Parameters  
 NAME F(2-NO2 chalcone)  
 EXPNO 51  
 PROCNO 1

F2 - Acquisition Parameters  
 Date\_ 20140328  
 Time 17.41  
 INSTRUM spect  
 PROBHD 5 mm BBO BB-1H  
 PULPROG zg30  
 TD 32768  
 SOLVENT CDCl3  
 NS 16  
 DS 0  
 SWH 7246.377 Hz  
 FIDRES 0.221142 Hz  
 AQ 2.2609921 sec  
 RG 181  
 DW 69.000 usec  
 DE 6.50 usec  
 TE 297.9 K  
 D1 2.0000000 sec  
 TDO 1

===== CHANNEL f1 =====  
 NUC1 1H  
 P1 14.35 usec  
 PL1 -2.00 dB  
 SFO1 400.1324008 MHz

F2 - Processing parameters  
 SI 16384  
 SF 400.1300118 MHz  
 WDW EM  
 SSB 0  
 LB 0 Hz  
 GB 0  
 PC 1.00

(Z)-3-(1H-indol-3-yl)-3-(2-nitrophenyl)-1-phenylpropan-1-one O-acetyl oxime

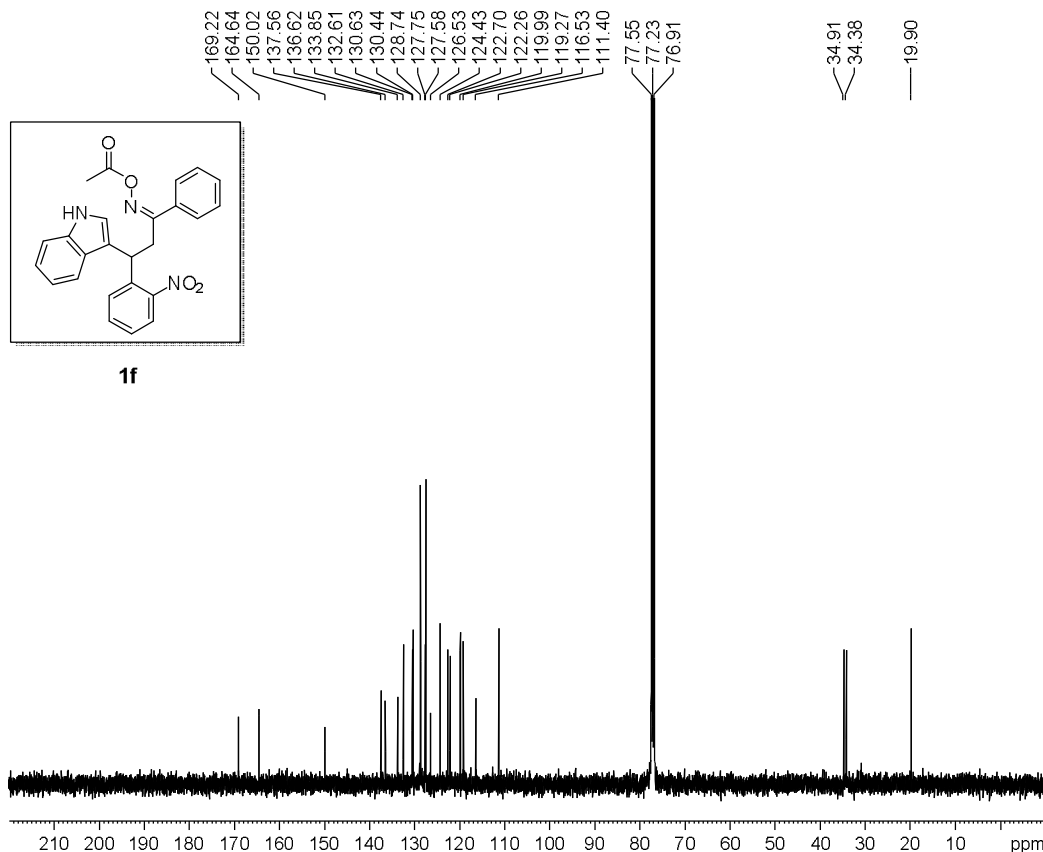

Current Data Parameters  
 NAME F(2-NO2 chalcone)  
 EXPNO 513  
 PROCNO 1

F2 - Acquisition Parameters  
 Date\_ 20140330  
 Time 21.06  
 INSTRUM spect  
 PROBHD 5 mm BBO BB-1H  
 PULPROG zgpg30  
 TD 32768  
 SOLVENT CDCl3  
 NS 1941  
 DS 0  
 SWH 24038.461 Hz  
 FIDRES 0.733596 Hz  
 AQ 0.6815744 sec  
 RG 32768  
 DW 20.900 usec  
 DE 6.50 usec  
 TE 300.7 K  
 D1 2.0000000 sec  
 D11 0.0300000 sec  
 TDO 1

===== CHANNEL f1 =====  
 NUC1 13C  
 P1 9.40 usec  
 PL1 7.00 dB  
 SFO1 100.6233325 MHz

===== CHANNEL f2 =====  
 CPDPRG2 waltz16  
 NUC2 1H  
 PCPD2 90.00 usec  
 PL2 -2.00 dB  
 PL12 13.95 dB  
 PL13 17.00 dB  
 SFO2 400.1316005 MHz

F2 - Processing parameters  
 SI 32768  
 SF 100.6127660 MHz  
 WDW EM  
 SSB 0  
 LB 1.00 Hz  
 GB 0  
 PC 1.00

(Z)-3-(1H-indol-3-yl)-3-(3-methoxyphenyl)-1-phenylpropan-1-one O-acetyl oxime

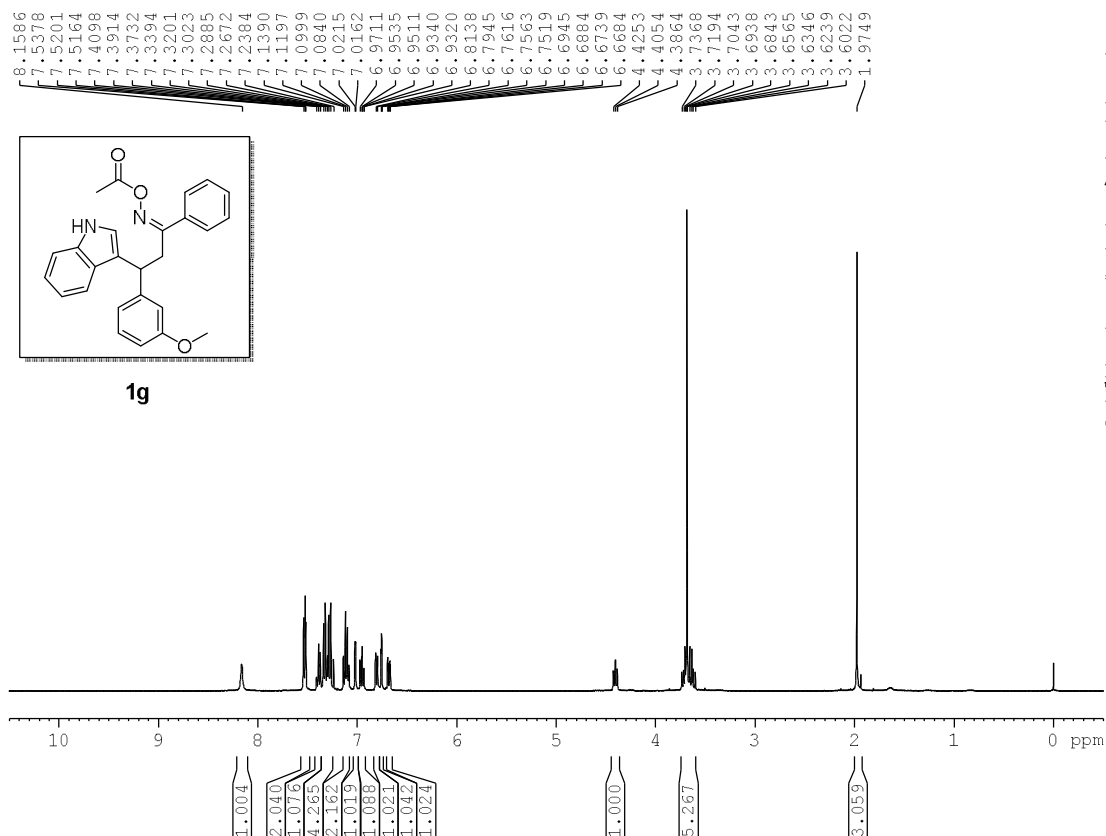

Current Data Parameters  
 NAME 20161226  
 EXPNO 2  
 PROCNO 1

F2 - Acquisition Parameters  
 Date\_ 20161228  
 Time 16.50  
 INSTRUM spect  
 PROBHD 5 mm BBO BB-1H  
 PULPROG zg30  
 TD 32768  
 SOLVENT CDCl3  
 NS 16  
 DS 0  
 SWH 7246.377 Hz  
 FIDRES 0.221142 Hz  
 AQ 2.2609921 sec  
 RG 114  
 DW 69.000 usec  
 DE 6.50 usec  
 TE 298.4 K  
 D1 2.0000000 sec  
 TDO

===== CHANNEL f1 =====  
 NUC1 1H  
 P1 14.40 usec  
 PL1 1.80 dB  
 SFO1 400.1324008 MHz

F2 - Processing parameters  
 SI 16584  
 SF 400.1300179 MHz  
 WDW EM  
 SSB 0  
 LB 0 Hz  
 GB 0  
 PC 1.00

(Z)-3-(1H-indol-3-yl)-3-(3-methoxyphenyl)-1-phenylpropan-1-one O-acetyl oxime

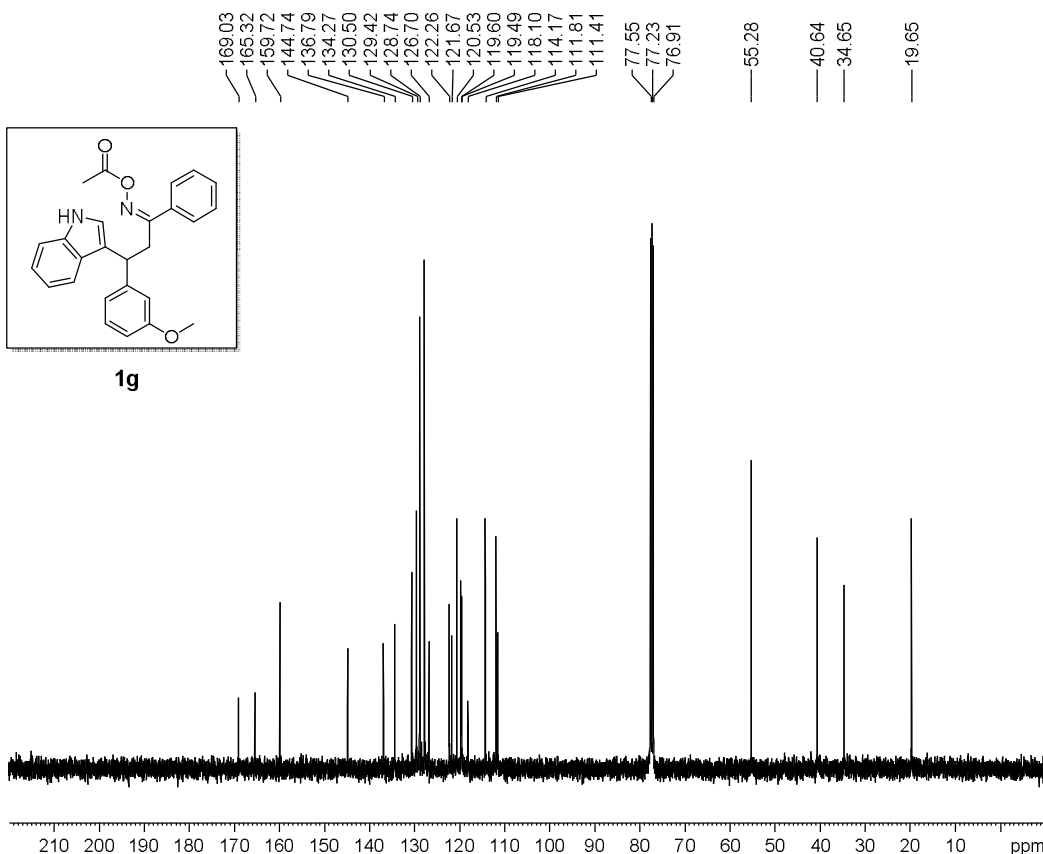

Current Data Parameters  
 NAME G(3-OMe chalcone)  
 EXPNO 513  
 PROCNO 1

F2 - Acquisition Parameters  
 Date\_ 20140328  
 Time 13.38  
 INSTRUM spect  
 PROBHD 5 mm BBO BB-1H  
 PULPROG zgpg30  
 TD 32768  
 SOLVENT CDCl3  
 NS 393  
 DS 0  
 SWH 24038.461 Hz  
 FIDRES 0.733596 Hz  
 AQ 0.6815744 sec  
 RG 8192  
 DW 20.800 usec  
 DE 6.50 usec  
 TE 299.9 K  
 D1 2.0000000 sec  
 D11 0.03000000 sec  
 TDO 1

===== CHANNEL f1 =====  
 NUC1 13C  
 P1 9.40 usec  
 PL1 7.00 dB  
 SFO1 100.6233325 MHz

===== CHANNEL f2 =====  
 CPDPRG2 waltz16  
 NUC2 1H  
 PCPD2 90.00 usec  
 PL2 -2.00 dB  
 PL12 13.95 dB  
 PL13 17.00 dB  
 SFO2 400.1316005 MHz

F2 - Processing parameters  
 SI 32768  
 SF 100.6127536 MHz  
 WDW EM  
 SSB 0  
 LB 1.00 Hz  
 GB 0  
 PC 1.00



(Z)-3-(1H-indol-3-yl)-1-phenyl-3-(thiophen-2-yl)propan-1-one O-acetyl oxime

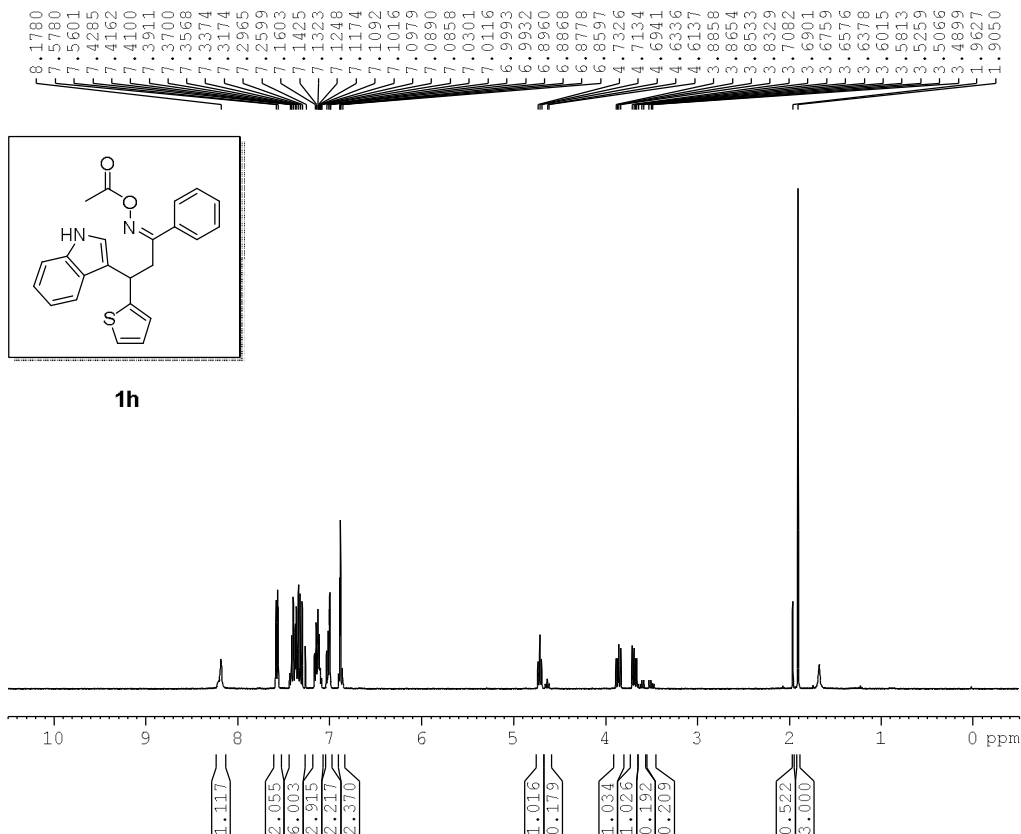

Current Data Parameters  
NAME l(2-thiophene chalcone)  
EXPNO 51  
PROCNO 1

F2 - Acquisition Parameters  
Date\_ 20161024  
Time 17.59  
INSTRUM spect  
PROBHD 5 mm PABBO BB/  
PULPROG zg30  
TD 32768  
SOLVENT CDCl3  
NS 16  
DS 0  
SWH 7211.539 Hz  
FIDRES 0.220079 Hz  
AQ 2.2719147 sec  
RG 4.01  
DW 69.333 usec  
DE 10.50 usec  
TE 298.1 K  
D1 2.0000000 sec  
TD0 1

==== CHANNEL f1 =====  
SFO1 400.1324008 MHz  
NUC1 1H  
P1 12.90 usec  
PLW1 15.00000000 W  
F2 - Processing parameters  
SI 16384  
SF 400.1300101 MHz  
WDW EM  
SSB 0  
LB 0 Hz  
GB 0  
PC 1.00

(Z)-3-(1H-indol-3-yl)-1-phenyl-3-(thiophen-2-yl)propan-1-one O-acetyl oxime

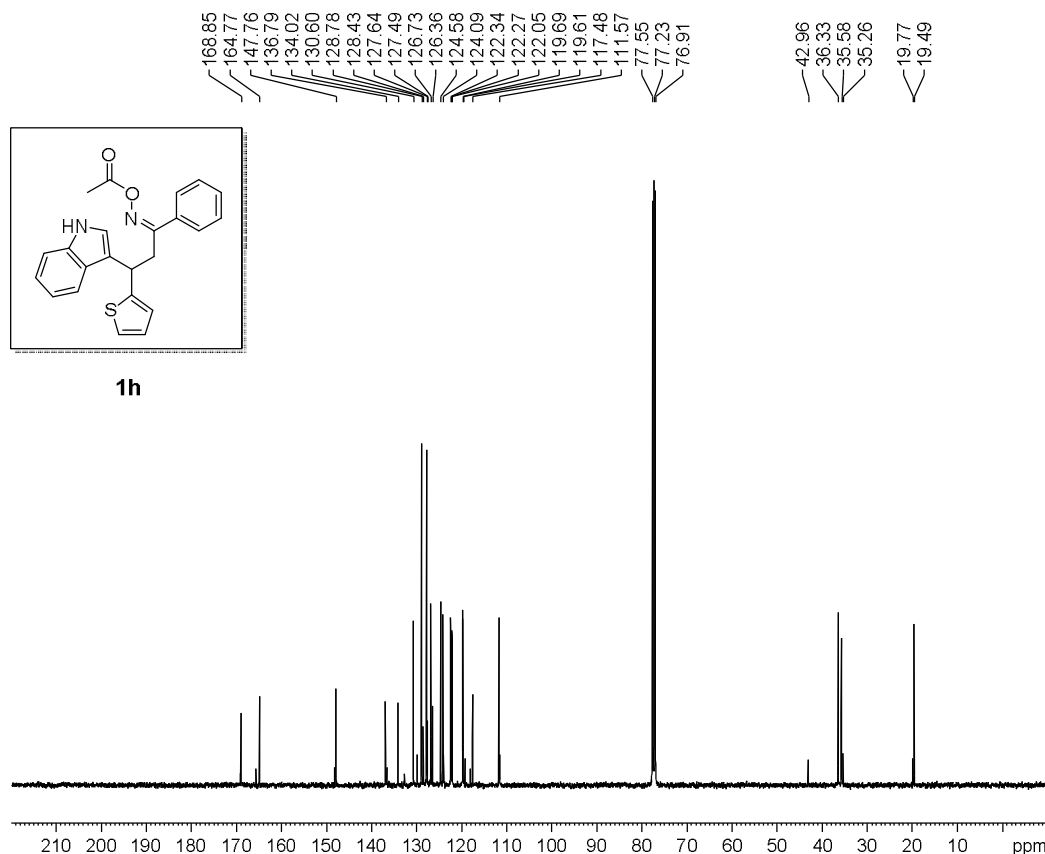

Current Data Parameters  
NAME l(2-thiophene chalcone)  
EXPNO 513  
PROCNO 1

F2 - Acquisition Parameters  
Date\_ 20161024  
Time 18.03  
INSTRUM spect  
PROBHD 5 mm PABBO BB/  
PULPROG zgpg30  
TD 32768  
SOLVENT CDCl3  
NS 1014  
DS 0  
SWH 24038.461 Hz  
FIDRES 0.733596 Hz  
AQ 0.6815744 sec  
RG 198.09  
DW 20.900 usec  
DE 6.50 usec  
TE 299.2 K  
D1 2.0000000 sec  
D11 0.03000000 sec  
TD0 1

==== CHANNEL f1 =====  
SFO1 100.6228298 MHz  
NUC1 13C  
P1 10.00 usec  
PLW1 47.50000000 W  
==== CHANNEL f2 =====  
SFO2 400.1316005 MHz  
NUC2 1H  
CPDPRG2 waltz16  
PCPD2 90.00 usec  
PLW2 15.00000000 W  
PLW12 0.33750001 W  
PLW13 0.27338001 W

F2 - Processing parameters  
SI 32768  
SF 100.6127524 MHz  
WDW EM  
SSB 0  
LB 2.00 Hz  
GB 0  
PC 1.00

(Z)-1-(4-chlorophenyl)-3-(1H-indol-3-yl)-3-phenylpropan-1-one O-acetyl oxime

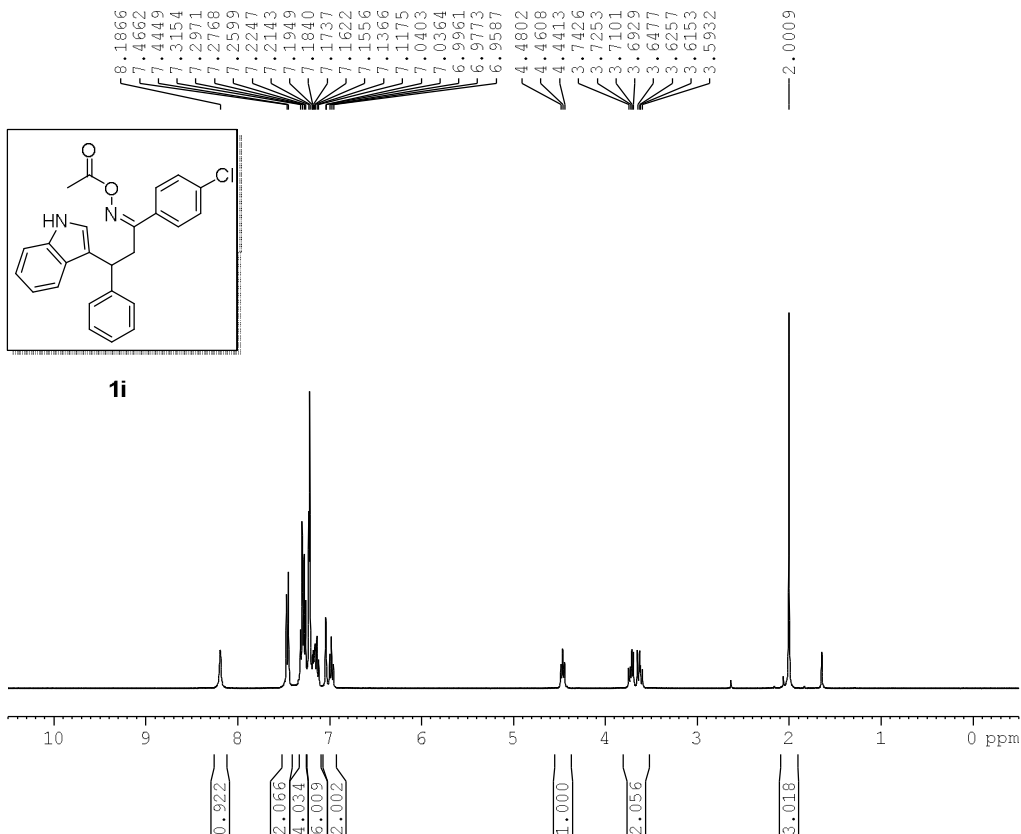

Current Data Parameters  
 NAME J(4-Cl chalcone)  
 EXPNO 51  
 PROCNO 1

F2 - Acquisition Parameters  
 Date\_ 20140329  
 Time 17.19  
 INSTRUM spect  
 PROBHD 5 mm BBO BB-1H  
 PULPROG zg30  
 TD 32768  
 SOLVENT CDCl3  
 NS 16  
 DS 0  
 SWH 7246.377 Hz  
 FIDRES 0.221142 Hz  
 AQ 2.2609921 sec  
 RG 181  
 DW 69.000 usec  
 DE 6.50 usec  
 TE 300.8 K  
 D1 2.0000000 sec  
 TDO 1

===== CHANNEL f1 =====  
 NUC1 1H  
 P1 11.80 usec  
 PL1 3.00 dB  
 SFO1 400.1324008 MHz

F2 - Processing parameters  
 SI 16384  
 SF 400.1300091 MHz  
 WDW EM  
 SSB 0  
 LB 0 Hz  
 GB 0  
 PC 1.00

(Z)-1-(4-chlorophenyl)-3-(1H-indol-3-yl)-3-phenylpropan-1-one O-acetyl oxime

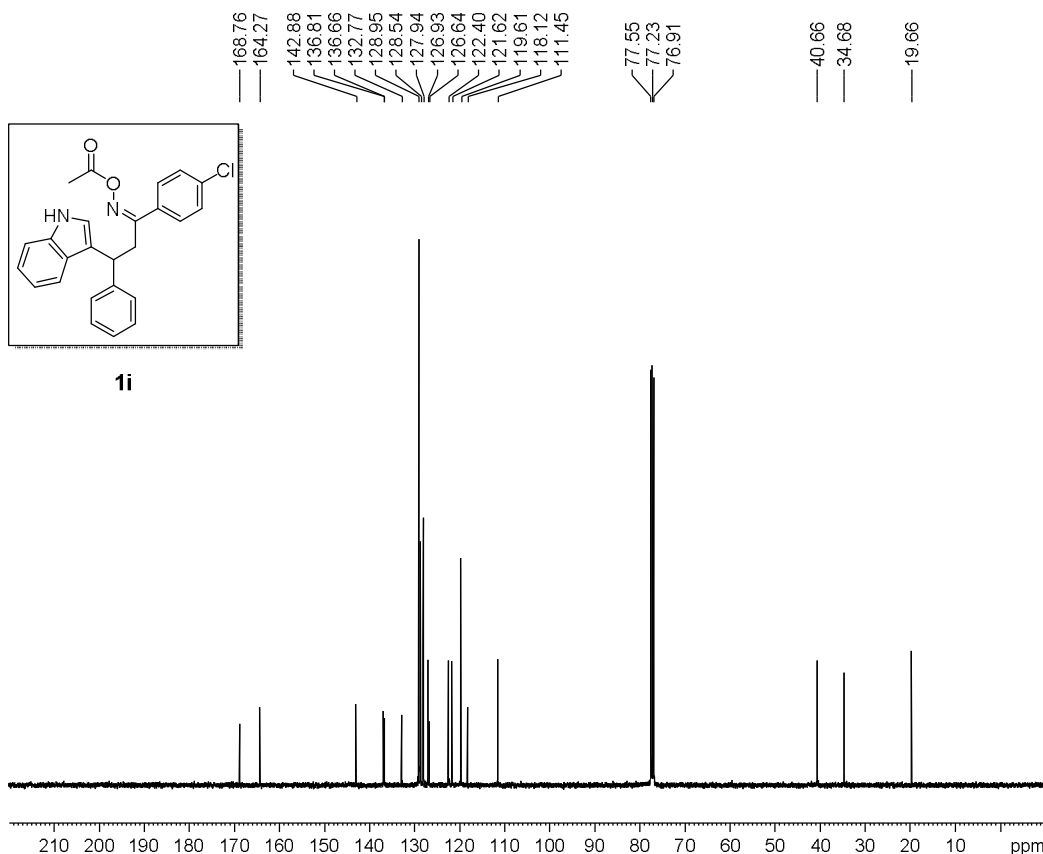

Current Data Parameters  
 NAME J(4-Cl chalcone)  
 EXPNO 513  
 PROCNO 1

F2 - Acquisition Parameters  
 Date\_ 20140329  
 Time 17.23  
 INSTRUM spect  
 PROBHD 5 mm BBO BB-1H  
 PULPROG zgpg30  
 TD 32768  
 SOLVENT CDCl3  
 NS 874  
 DS 0  
 SWH 24038.461 Hz  
 FIDRES 0.733596 Hz  
 AQ 0.6815744 sec  
 RG 16384  
 DW 20.800 usec  
 DE 6.50 usec  
 TE 301.1 K  
 D1 2.0000000 sec  
 D11 0.03000000 sec  
 TDO 1

===== CHANNEL f1 =====  
 NUC1 13C  
 P1 9.40 usec  
 PL1 7.00 dB  
 SFO1 100.6233325 MHz

===== CHANNEL f2 =====  
 CPDPRG2 waltz16  
 NUC2 1H  
 PCPD2 90.00 usec  
 PL2 -2.00 dB  
 PL12 13.95 dB  
 PL13 17.00 dB  
 SFO2 400.1316005 MHz

F2 - Processing parameters  
 SI 32768  
 SF 100.6127522 MHz  
 WDW EM  
 SSB 0  
 LB 1.00 Hz  
 GB 0  
 PC 1.00

(Z)-1-(4-bromophenyl)-3-(1H-indol-3-yl)-3-phenylpropan-1-one O-acetyl oxime

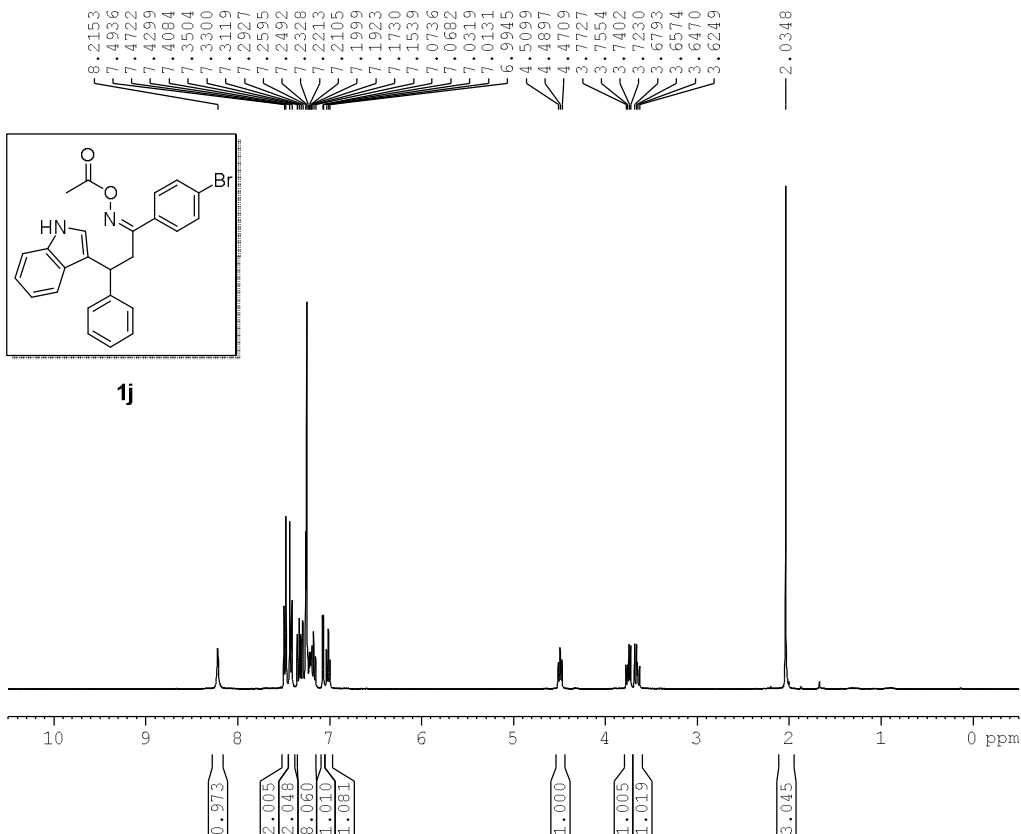

Current Data Parameters  
 NAME K(4-Br chalcone)  
 EXPNO 51  
 PROCNO 1

F2 - Acquisition Parameters  
 Date\_ 20150110  
 Time 15.21  
 INSTRUM spect  
 PROBHD 5 mm PABBO BB/  
 PULPROG zg30  
 TD 32768  
 SOLVENT CDCl3  
 NS 16  
 DS 0  
 SWH 7211.539 Hz  
 FIDRES 0.220079 Hz  
 AQ 2.2719147 sec  
 RG 71.42  
 DW 69.353 usec  
 DE 10.52 usec  
 TE 297.5 K  
 D1 2.0000000 sec  
 TDO 1

==== CHANNEL f1 =====  
 SFO1 400.1324008 MHz  
 NUC1 1H  
 P1 12.80 usec  
 PLW1 15.0000000 W

F2 - Processing parameters  
 SI 16384  
 SF 400.1289948 MHz  
 WDW EM  
 SSB 0  
 LB 0 Hz  
 GB 0  
 PC 1.00

(Z)-1-(4-bromophenyl)-3-(1H-indol-3-yl)-3-phenylpropan-1-one O-acetyl oxime

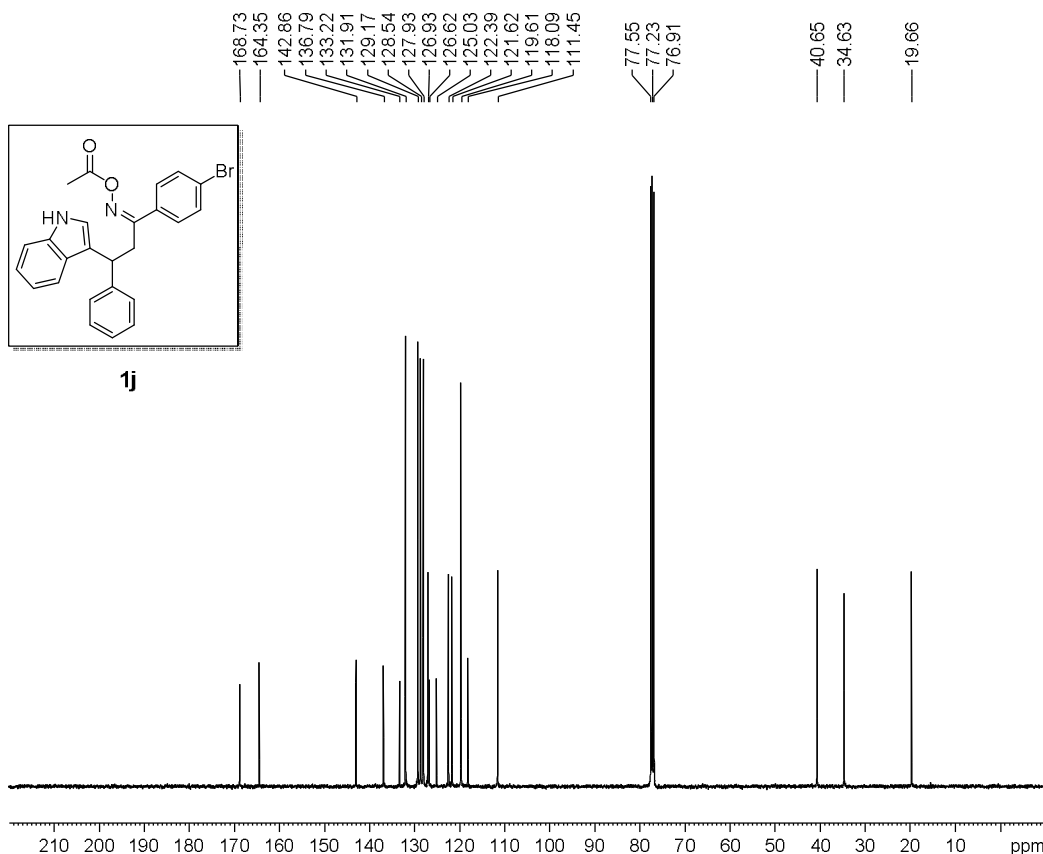

Current Data Parameters  
 NAME K(4-Br chalcone)  
 EXPNO 513  
 PROCNO 1

F2 - Acquisition Parameters  
 Date\_ 20150109  
 Time 2.16  
 INSTRUM spect  
 PROBHD 5 mm PABBO BB/  
 PULPROG zgpg30  
 TD 32768  
 SOLVENT CDCl3  
 NS 2000  
 DS 0  
 SWH 24038.461 Hz  
 FIDRES 0.733596 Hz  
 AQ 0.6815744 sec  
 RG 198.09  
 DW 20.900 usec  
 DE 6.50 usec  
 TE 297.6 K  
 D1 2.0000000 sec  
 D11 0.0300000 sec  
 TDO 1

==== CHANNEL f1 =====  
 SFO1 100.6233319 MHz  
 NUC1 13C  
 P1 10.00 usec  
 PLW1 46.0000000 W

==== CHANNEL f2 =====  
 SFO2 400.1318005 MHz  
 NUC2 1H  
 CPDPRG2 waltz16  
 PCPD2 90.00 usec  
 PLW2 15.0000000 W  
 PLW12 0.34252000 W  
 PLW13 0.27744001 W

F2 - Processing parameters  
 SI 32768  
 SF 100.6127531 MHz  
 WDW EM  
 SSB 0  
 LB 2.00 Hz  
 GB 0  
 PC 1.00

(Z)-3-(1H-indol-3-yl)-1-(4-nitrophenyl)-3-phenylpropan-1-one O-acetyl oxime

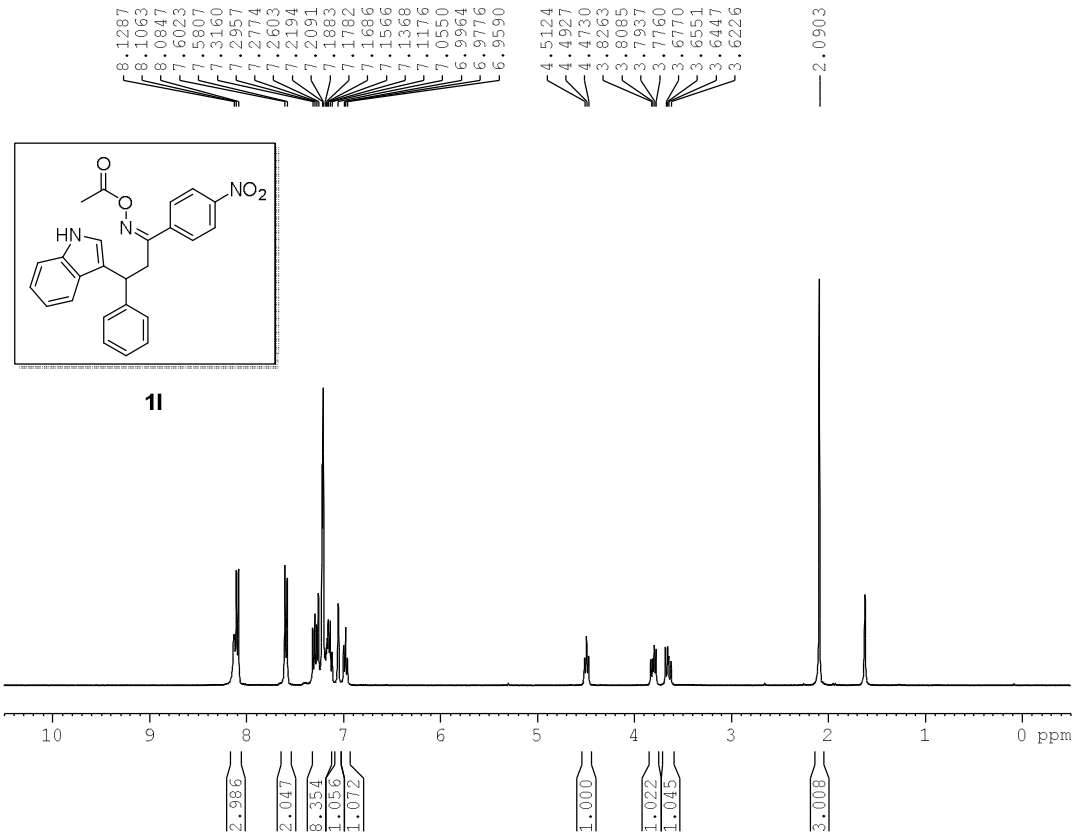

Current Data Parameters  
 NAME 20161109  
 EXPNO 5  
 PROCNO 1

F2 - Acquisition Parameters  
 Date\_ 20161109  
 Time 7.01  
 INSTRUM spect  
 PROBHD 5 mm BBO BB-1H  
 PULPROG zg30  
 TD 32768  
 SOLVENT CDCl3  
 NS 16  
 DS 0  
 SWH 7246.377 Hz  
 FIDRES 0.221142 Hz  
 AQ 2.2609921 sec  
 RG 114  
 DW 69.000 usec  
 DE 6.50 usec  
 TE 296.2 K  
 D1 2.0000000 sec  
 TDO

===== CHANNEL f1 =====  
 NUC1 1H  
 P1 14.40 usec  
 PL1 1.80 dB  
 SFO1 400.1324008 MHz

F2 - Processing parameters  
 SI 16384  
 SF 400.1300088 MHz  
 WDW EM  
 SSB 0  
 LB 0 Hz  
 GB 0  
 PC 1.00

(Z)-3-(1H-indol-3-yl)-1-(4-nitrophenyl)-3-phenylpropan-1-one O-acetyl oxime

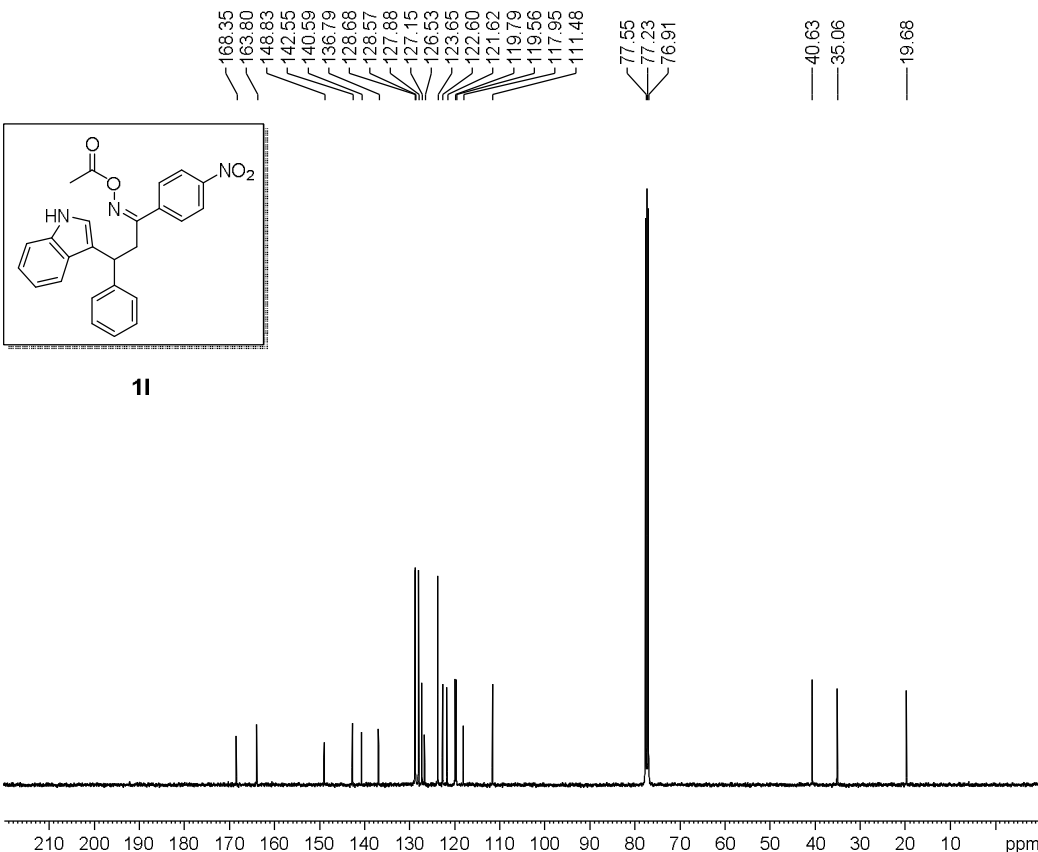

Current Data Parameters  
 NAME L(4-NO2 chalcone)  
 EXPNO 513  
 PROCNO 1

F2 - Acquisition Parameters  
 Date\_ 20140330  
 Time 20.39  
 INSTRUM spect  
 PROBHD 5 mm PABBO BB/  
 PULPROG zgpg30  
 TD 32768  
 SOLVENT CDCl3  
 NS 1500  
 DS 0  
 SWH 24038.461 Hz  
 FIDRES 0.733596 Hz  
 AQ 0.6815744 sec  
 RG 198.09  
 DW 20.900 usec  
 DE 6.50 usec  
 TE 298.4 K  
 D1 2.0000000 sec  
 D11 0.03000000 sec  
 TDO 1

===== CHANNEL f1 =====  
 SFO1 100.623324 MHz  
 NUC1 13C  
 P1 10.00 usec  
 PLW1 46.0000000 W

===== CHANNEL f2 =====  
 SFO2 400.1316005 MHz  
 NUC2 1H  
 CPDPRG2 waltz16  
 PCPD2 90.00 usec  
 PLW2 15.0000000 W  
 PLW12 0.34252000 W  
 PLW13 0.27744001 W

F2 - Processing parameters  
 SI 32768  
 SF 100.6127498 MHz  
 WDW EM  
 SSB 0  
 LB 2.00 Hz  
 GB 0  
 PC 1.00

(Z)-3-(1H-indol-3-yl)-1-(4-isopropylphenyl)-3-phenylpropan-1-one O-acetyl oxime

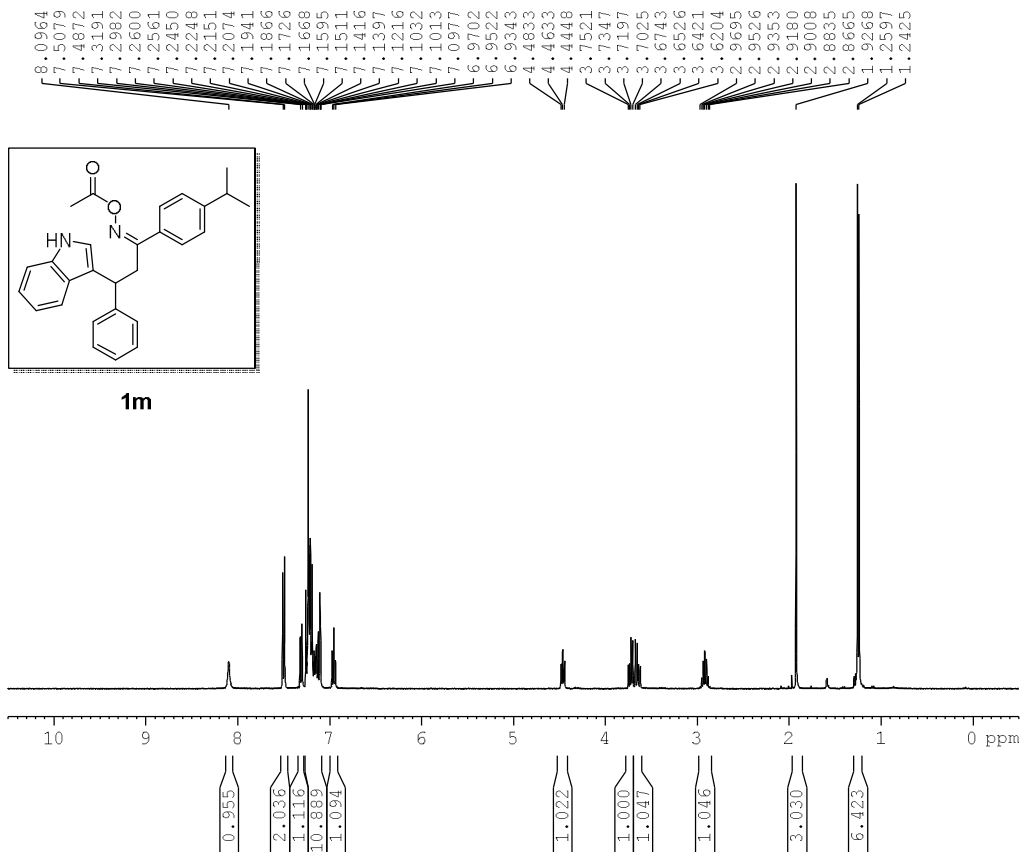

Current Data Parameters  
 NAME M(4-cumene chalcone)  
 EXPNO 51  
 PROCNO 1

F2 - Acquisition Parameters  
 Date\_ 20150120  
 Time 15.27  
 INSTRUM spect  
 PROBHD 5 mm PABBO BB/  
 PULPROG zg30  
 TD 32768  
 SOLVENT CDCl3  
 NS 16  
 DS 0  
 SWH 7211.539 Hz  
 FIDRES 0.220079 Hz  
 AQ 2.2719147 sec  
 RG 89.09  
 DW 69.333 usec  
 DE 10.52 usec  
 TE 297.8 K  
 D1 2.0000000 sec  
 TDO 1

===== CHANNEL f1 =====  
 SFO1 400.1324008 MHz  
 NUC1 1H  
 P1 12.80 usec  
 PLW1 15.0000000 W

F2 - Processing parameters  
 SI 16384  
 SF 400.1300092 MHz  
 WDW EM  
 SSB 0  
 LB 0 Hz  
 GB 0  
 PC 1.00

(Z)-3-(1H-indol-3-yl)-1-(4-isopropylphenyl)-3-phenylpropan-1-one O-acetyl oxime

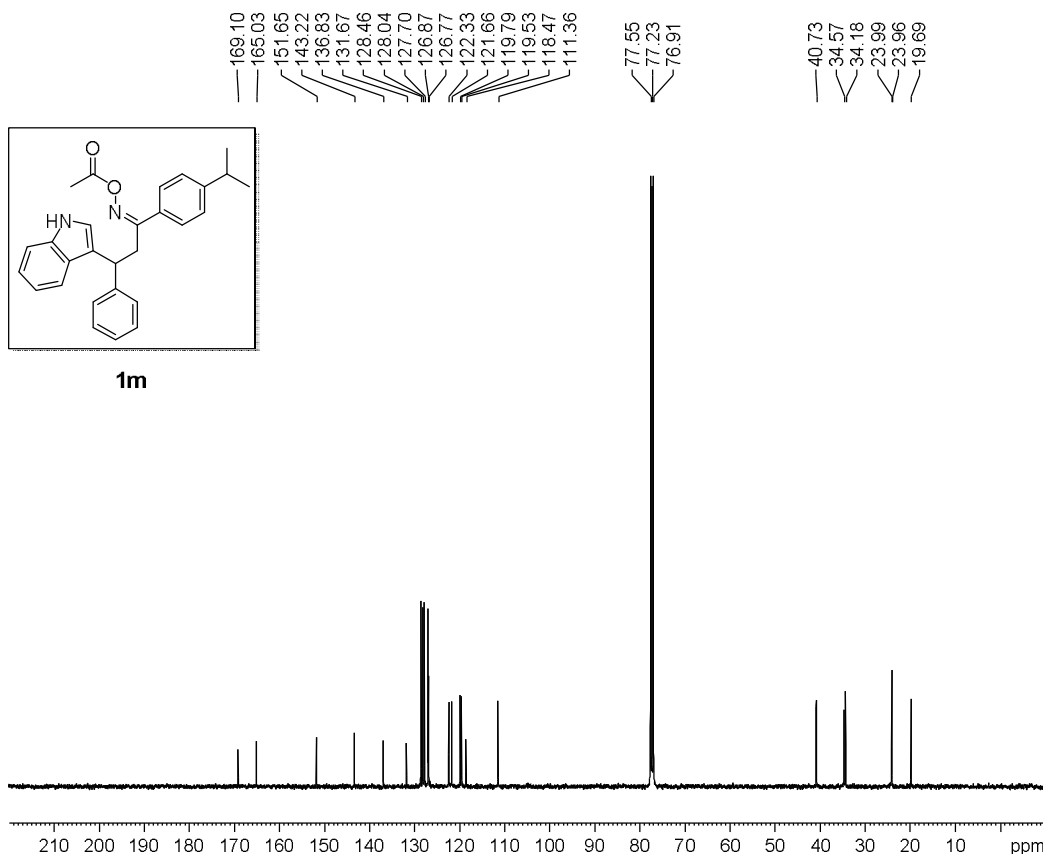

Current Data Parameters  
 NAME M(4-cumene chalcone)  
 EXPNO 513  
 PROCNO 1

F2 - Acquisition Parameters  
 Date\_ 20150120  
 Time 17.09  
 INSTRUM spect  
 PROBHD 5 mm PABBO BB/  
 PULPROG zgpg30  
 TD 32768  
 SOLVENT CDCl3  
 NS 1239  
 DS 0  
 SWH 24038.461 Hz  
 FIDRES 0.733596 Hz  
 AQ 0.6815744 sec  
 RG 198.09  
 DW 20.900 usec  
 DE 6.50 usec  
 TE 297.7 K  
 D1 2.0000000 sec  
 D11 0.03000000 sec  
 TDO 1

===== CHANNEL f1 =====  
 SFO1 100.6233319 MHz  
 NUC1 13C  
 P1 10.00 usec  
 PLW1 46.0000000 W

===== CHANNEL f2 =====  
 SFO2 400.1318005 MHz  
 NUC2 1H  
 CPDPRG2 waltz16  
 PCPD2 90.00 usec  
 PLW2 15.0000000 W  
 PLW12 0.34252000 W  
 PLW13 0.27744001 W

F2 - Processing parameters  
 SI 32768  
 SF 100.6127491 MHz  
 WDW EM  
 SSB 0  
 LB 2.00 Hz  
 GB 0  
 PC 1.00

(Z)-3-(1H-indol-3-yl)-1-(4-isobutylphenyl)-3-phenylpropan-1-one O-acetyl oxime

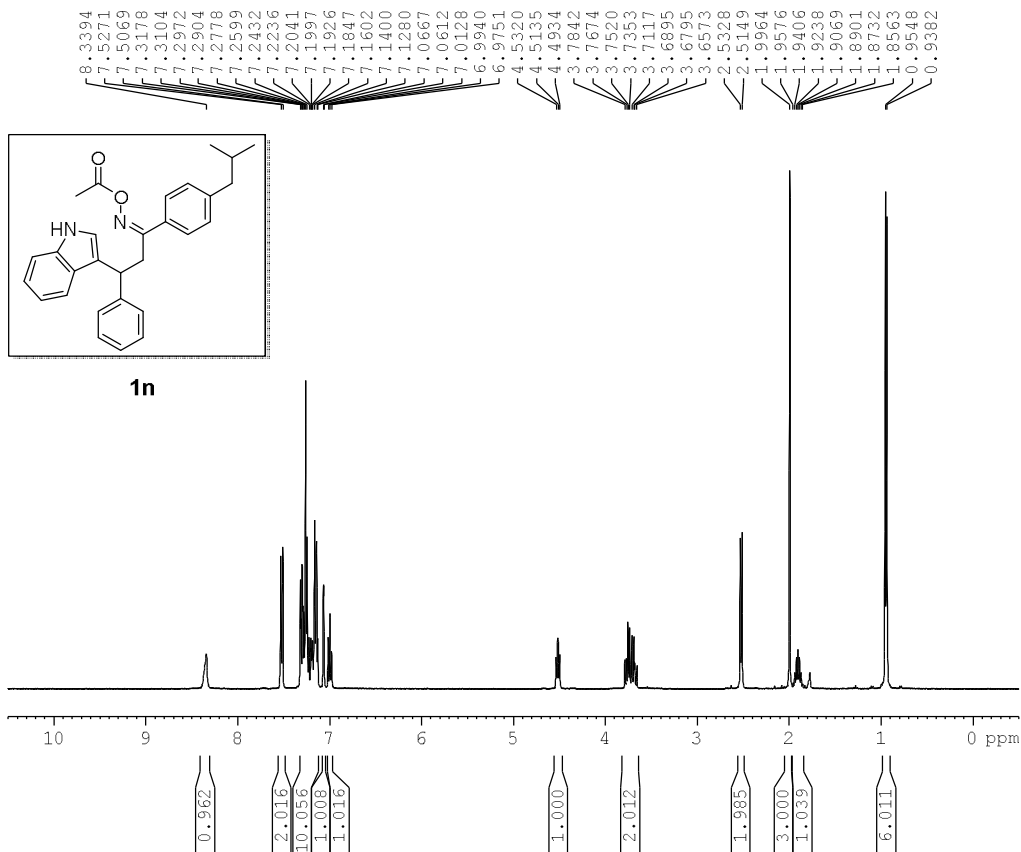

Current Data Parameters  
 NAME N(4-isobutyl chalcone)  
 EXPNO 51  
 PROCNO 1

F2 - Acquisition Parameters  
 Date\_ 20140204  
 Time 13.40  
 INSTRUM spect  
 PROBHD 5 mm BBO BB-1H  
 PULPROG zg30  
 TD 32768  
 SOLVENT CDCl3  
 NS 16  
 DS 0  
 SWH 7246.377 Hz  
 FIDRES 0.221142 Hz  
 AQ 2.2609921 sec  
 RG 57  
 DW 69.000 usec  
 DE 6.50 usec  
 TE 298.0 K  
 D1 2.0000000 sec  
 TDO 1

===== CHANNEL f1 =====  
 NUC1 1H  
 P1 11.80 usec  
 PL1 3.00 dB  
 SFO1 400.1324008 MHz

F2 - Processing parameters  
 SI 16384  
 SF 400.1300019 MHz  
 WDW EM  
 SSB 0  
 LB 0 Hz  
 GB 0  
 PC 1.00

(Z)-3-(1H-indol-3-yl)-1-(4-isobutylphenyl)-3-phenylpropan-1-one O-acetyl oxime

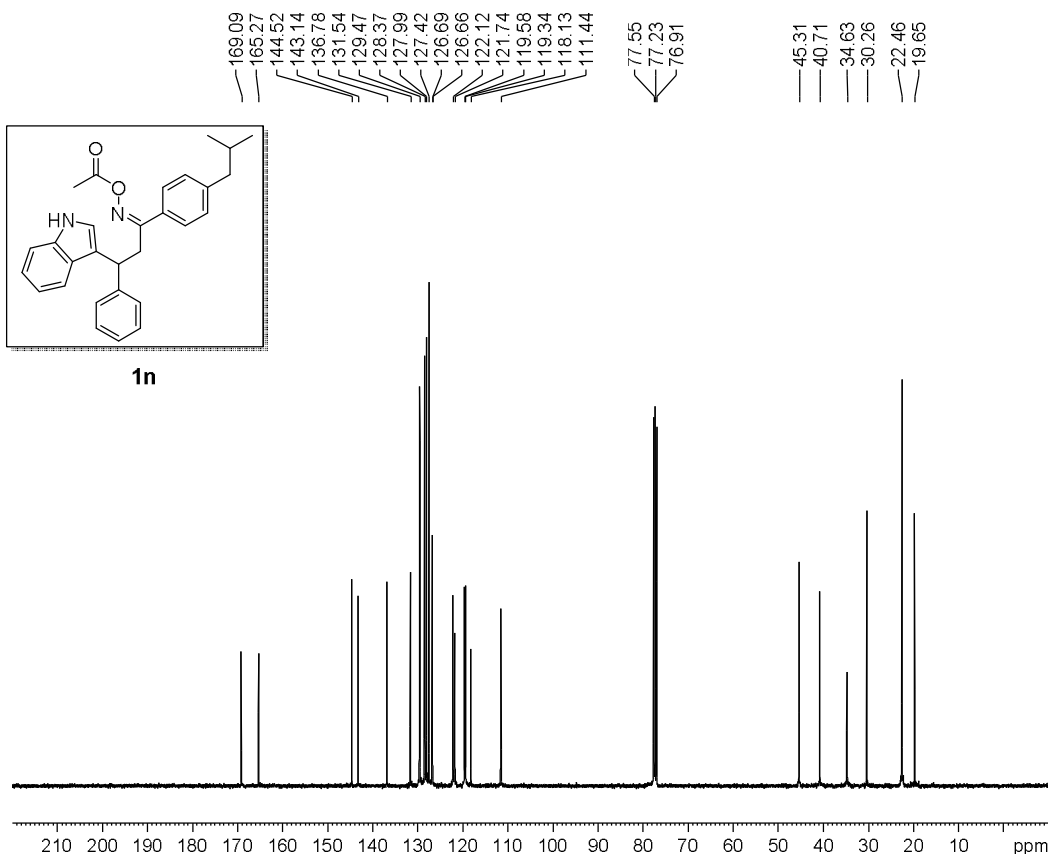

Current Data Parameters  
 NAME N(4-isobutyl chalcone)  
 EXPNO 513  
 PROCNO 1

F2 - Acquisition Parameters  
 Date\_ 20140204  
 Time 13.42  
 INSTRUM spect  
 PROBHD 5 mm BBO BB-1H  
 PULPROG zgpg30  
 TD 32768  
 SOLVENT CDCl3  
 NS 2759  
 DS 0  
 SWH 24038.461 Hz  
 FIDRES 0.733596 Hz  
 AQ 0.6815744 sec  
 RG 4096  
 DW 20.800 usec  
 DE 6.50 usec  
 TE 298.0 K  
 D1 2.0000000 sec  
 D11 0.0300000 sec  
 TDO 1

===== CHANNEL f1 =====  
 NUC1 13C  
 P1 9.40 usec  
 PL1 7.00 dB  
 SFO1 100.6233325 MHz

===== CHANNEL f2 =====  
 CPDPRG2 waltz16  
 NUC2 1H  
 PCPD2 90.00 usec  
 PL2 3.00 dB  
 PL12 23.70 dB  
 PL13 23.70 dB  
 SFO2 400.1316005 MHz

F2 - Processing parameters  
 SI 32768  
 SF 100.6127603 MHz  
 WDW EM  
 SSB 0  
 LB 1.00 Hz  
 GB 0  
 PC 1.00

(Z)-1-(4-(tert-butyl)phenyl)-3-(1H-indol-3-yl)-3-phenylpropan-1-one O-acetyl oxime

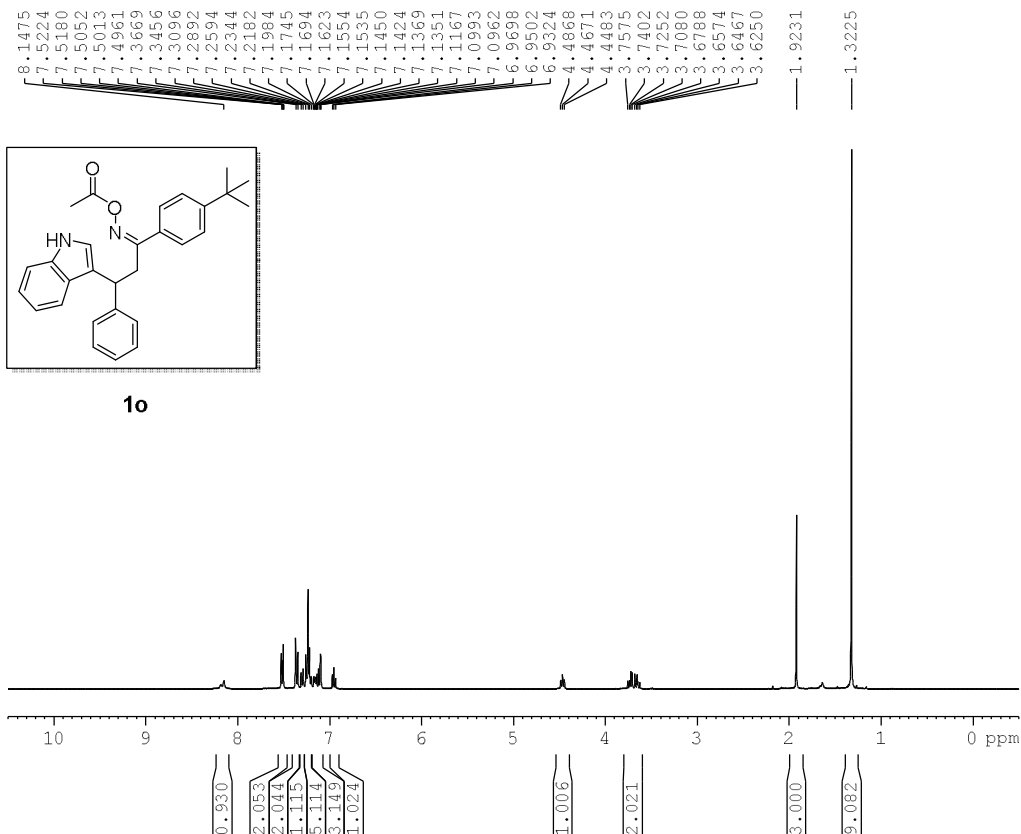

Current Data Parameters  
 NAME O(4-t-butyl chalcone)  
 EXPNO 51  
 PROCNO 1

F2 - Acquisition Parameters  
 Date\_ 20140422  
 Time 23.23  
 INSTRUM spect  
 PROBHD 5 mm PABBO BB/  
 PULPROG zg30  
 TD 32768  
 SOLVENT CDCl3  
 NS 16  
 DS 0  
 SWH 7211.539 Hz  
 FIDRES 0.220079 Hz  
 AQ 2.2719147 sec  
 RG 63.59  
 DW 69.333 usec  
 DE 10.52 usec  
 TE 298.2 K  
 D1 2.0000000 sec  
 TDO 1

==== CHANNEL f1 =====  
 SFO1 400.1324008 MHz  
 NUC1 1H  
 P1 12.80 usec  
 PLW1 15.0000000 W

F2 - Processing parameters  
 SI 16384  
 SF 400.1300096 MHz  
 WDW EM  
 SSB 0  
 LB 0 Hz  
 GB 0  
 PC 1.00

(Z)-1-(4-(tert-butyl)phenyl)-3-(1H-indol-3-yl)-3-phenylpropan-1-one O-acetyl oxime

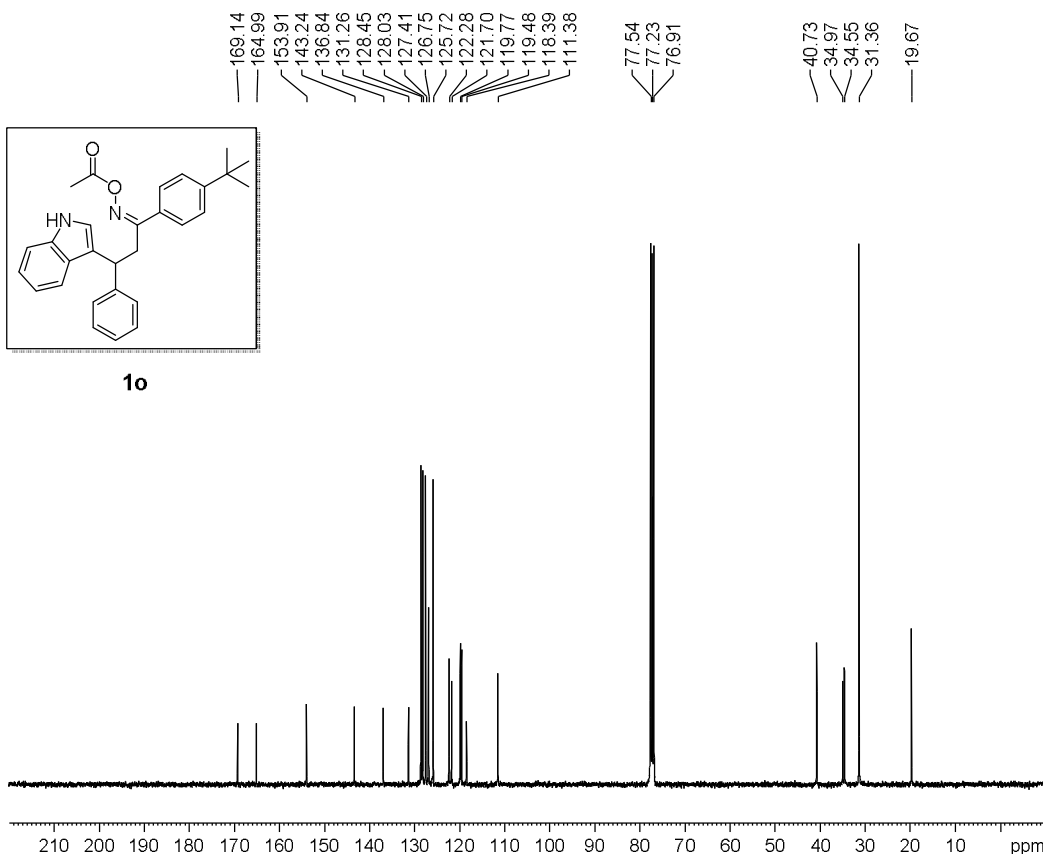

Current Data Parameters  
 NAME O(4-t-butyl chalcone)  
 EXPNO 513  
 PROCNO 1

F2 - Acquisition Parameters  
 Date\_ 20140422  
 Time 23.25  
 INSTRUM spect  
 PROBHD 5 mm PABBO BB/  
 PULPROG zgpg30  
 TD 32768  
 SOLVENT CDCl3  
 NS 1333  
 DS 0  
 SWH 24038.461 Hz  
 FIDRES 0.733596 Hz  
 AQ 0.6815744 sec  
 RG 198.09  
 DW 20.900 usec  
 DE 6.50 usec  
 TE 298.2 K  
 D1 2.0000000 sec  
 D11 0.03000000 sec  
 TDO 1

==== CHANNEL f1 =====  
 SFO1 100.6233319 MHz  
 NUC1 13C  
 P1 10.00 usec  
 PLW1 46.0000000 W

==== CHANNEL f2 =====  
 SFO2 400.1316005 MHz  
 NUC2 1H  
 CPDPRG2 waltz16  
 PCPD2 90.00 usec  
 PLW2 15.0000000 W  
 PLW12 0.34252000 W  
 PLW13 0.27744001 W

F2 - Processing parameters  
 SI 32768  
 SF 100.6127509 MHz  
 WDW EM  
 SSB 0  
 LB 2.00 Hz  
 GB 0  
 PC 1.00

(Z)-3-(1H-indol-3-yl)-3-phenyl-1-(p-tolyl)propan-1-one O-acetyl oxime

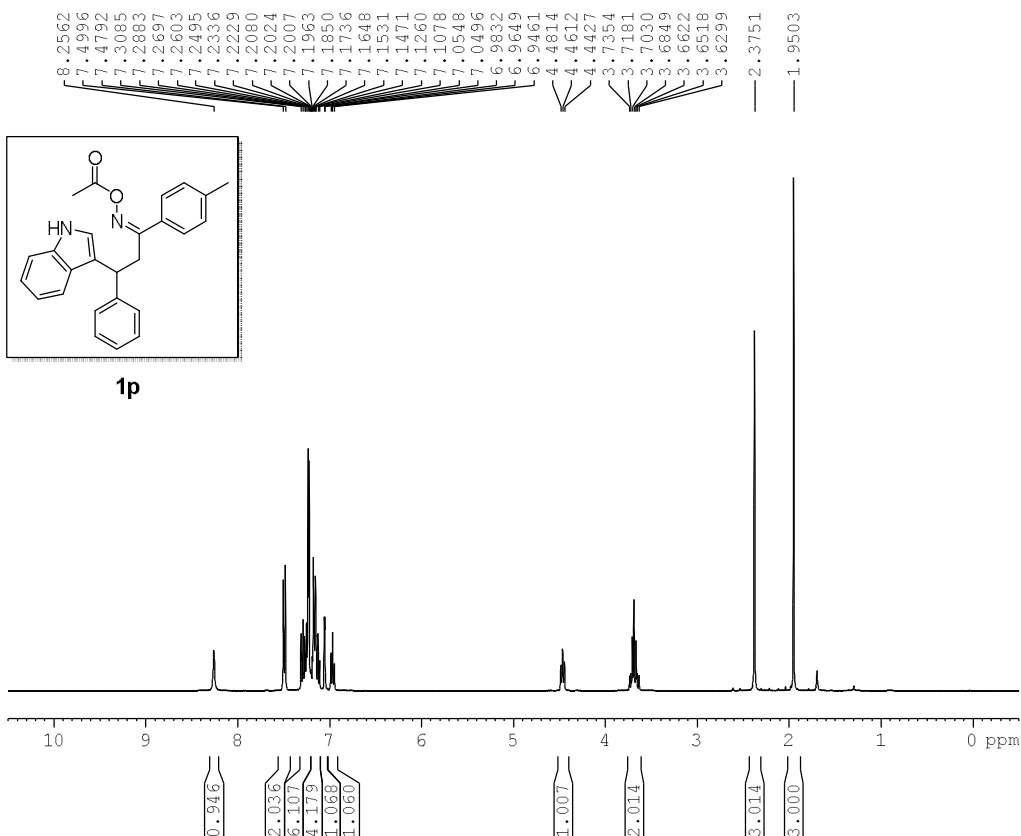

Current Data Parameters  
 NAME P(4-Me chalcone)  
 EXPNO 51  
 PROCNO 1

F2 - Acquisition Parameters  
 Date\_ 20140329  
 Time 16.12  
 INSTRUM spect  
 PROBHD 5 mm PABBO BB/  
 PULPROG zg30  
 TD 32768  
 SOLVENT CDCl3  
 NS 16  
 DS 0  
 SWH 7211.539 Hz  
 FIDRES 0.220079 Hz  
 AQ 2.2719147 sec  
 RG 51.8  
 DW 69.333 usec  
 DE 10.52 usec  
 TE 298.6 K  
 D1 2.0000000 sec  
 TDO 1

==== CHANNEL f1 =====  
 SFO1 400.1324008 MHz  
 NUC1 1H  
 P1 12.80 usec  
 PLW1 15.00000000 W

F2 - Processing parameters  
 SI 16384  
 SF 400.1300093 MHz  
 WDW EM  
 SSB 0  
 LB 0 Hz  
 GB 0  
 PC 1.00

(Z)-3-(1H-indol-3-yl)-3-phenyl-1-(p-tolyl)propan-1-one O-acetyl oxime

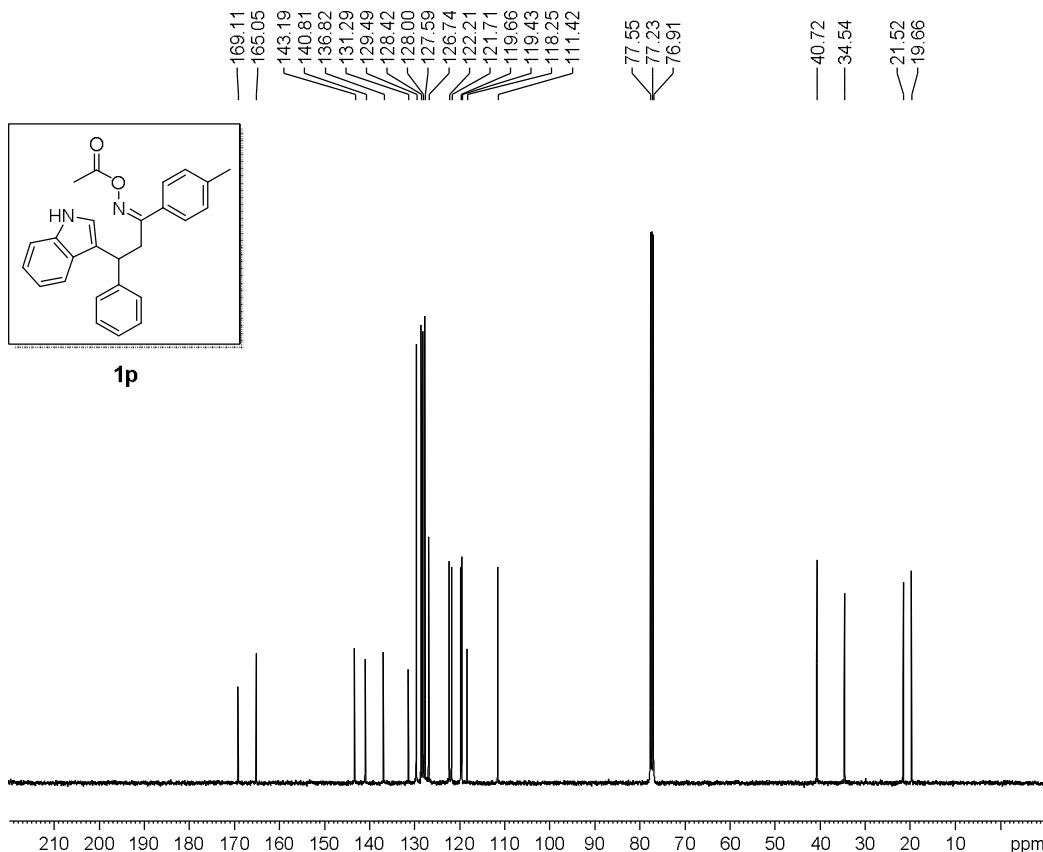

Current Data Parameters  
 NAME P(4-Me chalcone)  
 EXPNO 513  
 PROCNO 1

F2 - Acquisition Parameters  
 Date\_ 20140329  
 Time 16.14  
 INSTRUM spect  
 PROBHD 5 mm PABBO BB/  
 PULPROG zgpg30  
 TD 32768  
 SOLVENT CDCl3  
 NS 1163  
 DS 0  
 SWH 24038.461 Hz  
 FIDRES 0.733596 Hz  
 AQ 0.6815744 sec  
 RG 198.09  
 DW 20.800 usec  
 DE 6.50 usec  
 TE 298.7 K  
 D1 2.0000000 sec  
 D11 0.03000000 sec  
 TDO 1

==== CHANNEL f1 =====  
 SFO1 100.6233324 MHz  
 NUC1 13C  
 P1 10.00 usec  
 PLW1 46.00000000 W

==== CHANNEL f2 =====  
 SFO2 400.1316005 MHz  
 NUC2 1H  
 CPDPRG2 waltz16  
 PCPD2 90.00 usec  
 PLW2 15.00000000 W  
 PLW12 0.34252000 W  
 PLW13 0.27744001 W

F2 - Processing parameters  
 SI 32768  
 SF 100.6127543 MHz  
 WDW EM  
 SSB 0  
 LB 2.00 Hz  
 GB 0  
 PC 1.00



(Z)-3-(1H-indol-3-yl)-1-(naphthalen-2-yl)-3-phenylpropan-1-one O-acetyl oxime

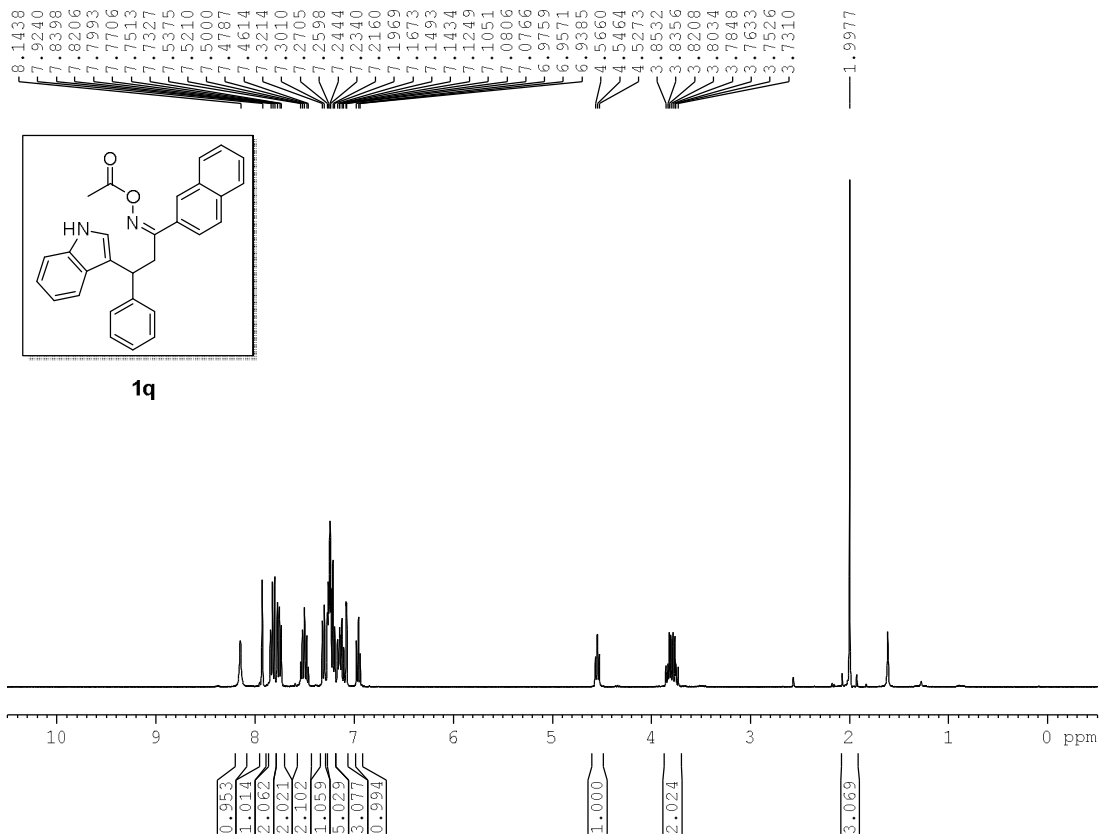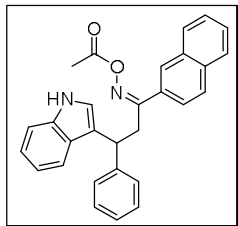

1q

Current Data Parameters  
 NAME Q(2-naphthyl chalcone)  
 EXPNO 51  
 PROCNO 1

F2 - Acquisition Parameters  
 Date\_ 20140328  
 Time 14.57  
 INSTRUM spect  
 PROBHD 5 mm BBO BB-1H  
 PULPROG zg30  
 TD 32768  
 SOLVENT CDCl3  
 NS 16  
 DS 0  
 SWH 7246.377 Hz  
 FIDRES 0.221142 Hz  
 AQ 2.2609921 sec  
 RG 114  
 DW 69.000 usec  
 DE 6.50 usec  
 TE 299.4 K  
 D1 2.0000000 sec  
 TDO 1

===== CHANNEL f1 =====  
 NUC1 1H  
 P1 14.35 usec  
 PL1 -2.00 dB  
 SFO1 400.1324008 MHz

F2 - Processing parameters  
 SI 16384  
 SF 400.1300096 MHz  
 WDW EM  
 SSB 0  
 LB 0 Hz  
 GB 0  
 PC 1.00

(Z)-3-(1H-indol-3-yl)-1-(naphthalen-2-yl)-3-phenylpropan-1-one O-acetyl oxime

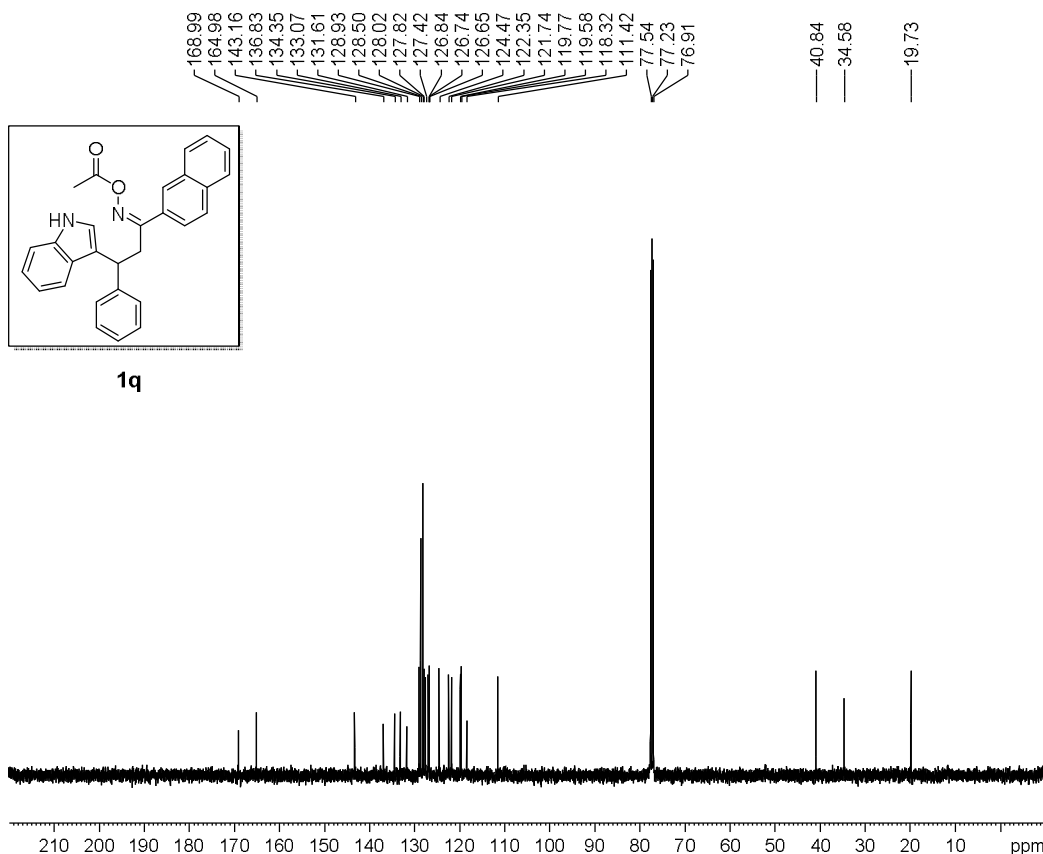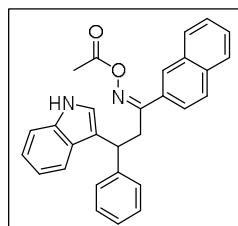

1q

Current Data Parameters  
 NAME Q(2-naphthyl chalcone)  
 EXPNO 513  
 PROCNO 1

F2 - Acquisition Parameters  
 Date\_ 20140328  
 Time 15.03  
 INSTRUM spect  
 PROBHD 5 mm BBO BB-1H  
 PULPROG zgpg30  
 TD 32768  
 SOLVENT CDCl3  
 NS 190  
 DS 0  
 SWH 24038.461 Hz  
 FIDRES 0.733596 Hz  
 AQ 0.6815744 sec  
 RG 8192  
 DW 20.800 usec  
 DE 6.50 usec  
 TE 299.7 K  
 D1 2.0000000 sec  
 D11 0.03000000 sec  
 TDO 1

===== CHANNEL f1 =====  
 NUC1 13C  
 P1 9.40 usec  
 PL1 7.00 dB  
 SFO1 100.6233325 MHz

===== CHANNEL f2 =====  
 CPDPRG2 waltz16  
 NUC2 1H  
 PCPD2 90.00 usec  
 PL2 -2.00 dB  
 PL12 13.95 dB  
 PL13 17.00 dB  
 SFO2 400.1316005 MHz

F2 - Processing parameters  
 SI 32768  
 SF 100.6127511 MHz  
 WDW EM  
 SSB 0  
 LB 1.00 Hz  
 GB 0  
 PC 1.00

(Z)-3-(1H-indol-3-yl)-1-(4-methoxyphenyl)-3-phenylpropan-1-one O-acetyl oxime

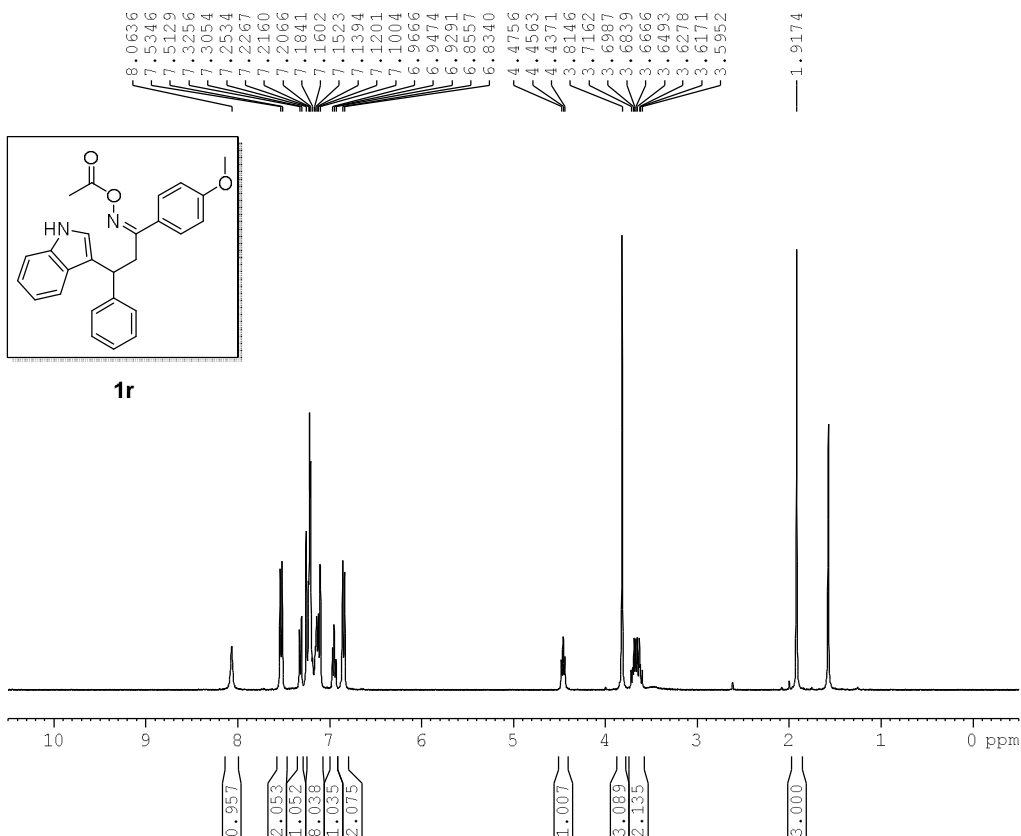

Current Data Parameters  
 NAME R(4-OMe chalcone)  
 EXPNO 51  
 PROCNO 1

F2 - Acquisition Parameters  
 Date\_ 20140327  
 Time 18.20  
 INSTRUM spect  
 PROBHD 5 mm BBO BB-1H  
 PULPROG zg30  
 TD 32768  
 SOLVENT CDCl3  
 NS 16  
 DS 0  
 SWH 7246.377 Hz  
 FIDRES 0.221142 Hz  
 AQ 2.2609921 sec  
 RG 256  
 DW 69.000 usec  
 DE 6.50 usec  
 TE 299.8 K  
 D1 2.0000000 sec  
 TDO 1

===== CHANNEL f1 =====  
 NUC1 1H  
 P1 14.35 usec  
 PL1 -2.00 dB  
 SFO1 400.1324008 MHz

F2 - Processing parameters  
 SI 16384  
 SF 400.1300118 MHz  
 WDW EM  
 SSB 0  
 LB 0 Hz  
 GB 0  
 PC 1.00

(Z)-3-(1H-indol-3-yl)-1-(4-methoxyphenyl)-3-phenylpropan-1-one O-acetyl oxime

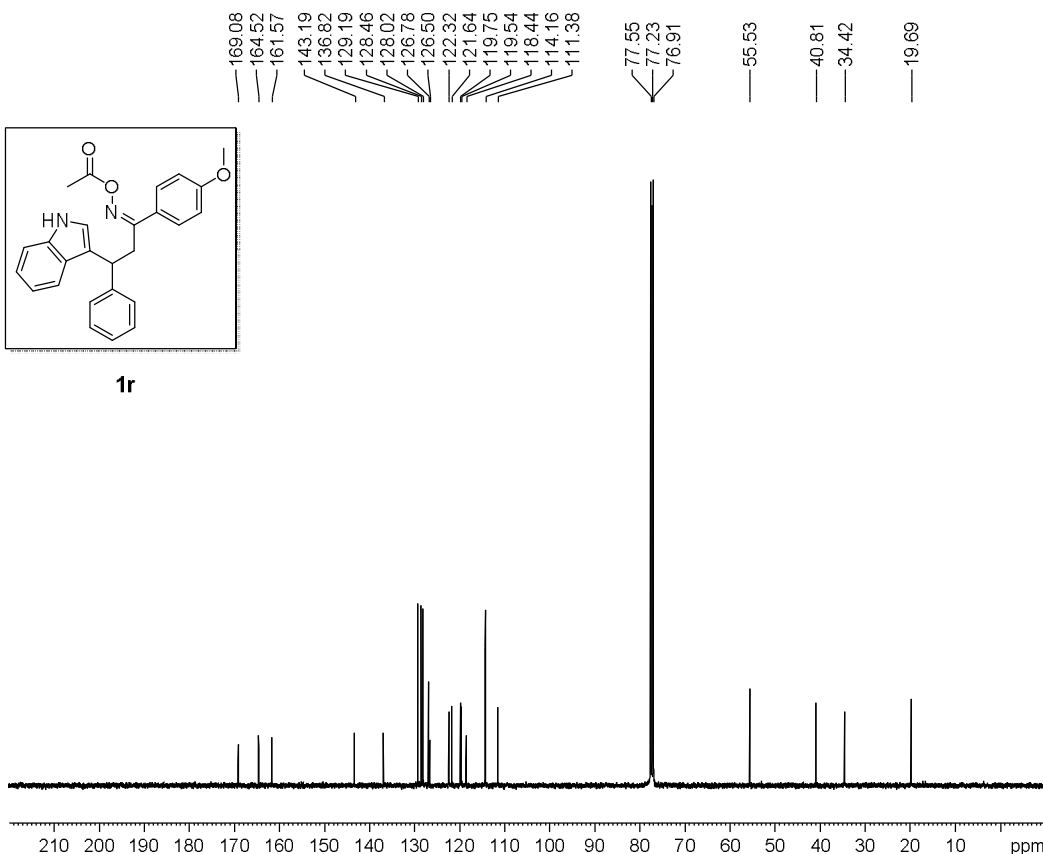

Current Data Parameters  
 NAME R(4-OMe chalcone)  
 EXPNO 513  
 PROCNO 1

F2 - Acquisition Parameters  
 Date\_ 20140324  
 Time 18.05  
 INSTRUM spect  
 PROBHD 5 mm BBO BB-1H  
 PULPROG zgpg30  
 TD 32768  
 SOLVENT CDCl3  
 NS 1300  
 DS 0  
 SWH 24038.461 Hz  
 FIDRES 0.733596 Hz  
 AQ 0.6815744 sec  
 RG 8192  
 DW 20.800 usec  
 DE 6.50 usec  
 TE 299.4 K  
 D1 2.0000000 sec  
 D11 0.03000000 sec  
 TDO 1

===== CHANNEL f1 =====  
 NUC1 13C  
 P1 9.40 usec  
 PL1 7.00 dB  
 SFO1 100.6233325 MHz

===== CHANNEL f2 =====  
 CPDPRG2 waltz16  
 NUC2 1H  
 PCPD2 90.00 usec  
 PL2 -2.00 dB  
 PL12 13.95 dB  
 PL13 17.00 dB  
 SFO2 400.1316005 MHz

F2 - Processing parameters  
 SI 32768  
 SF 100.6127498 MHz  
 WDW EM  
 SSB 0  
 LB 1.00 Hz  
 GB 0  
 PC 1.00

(Z)-3-(5-bromo-1H-indol-3-yl)-1,3-diphenylpropan-1-one O-acetyl oxime

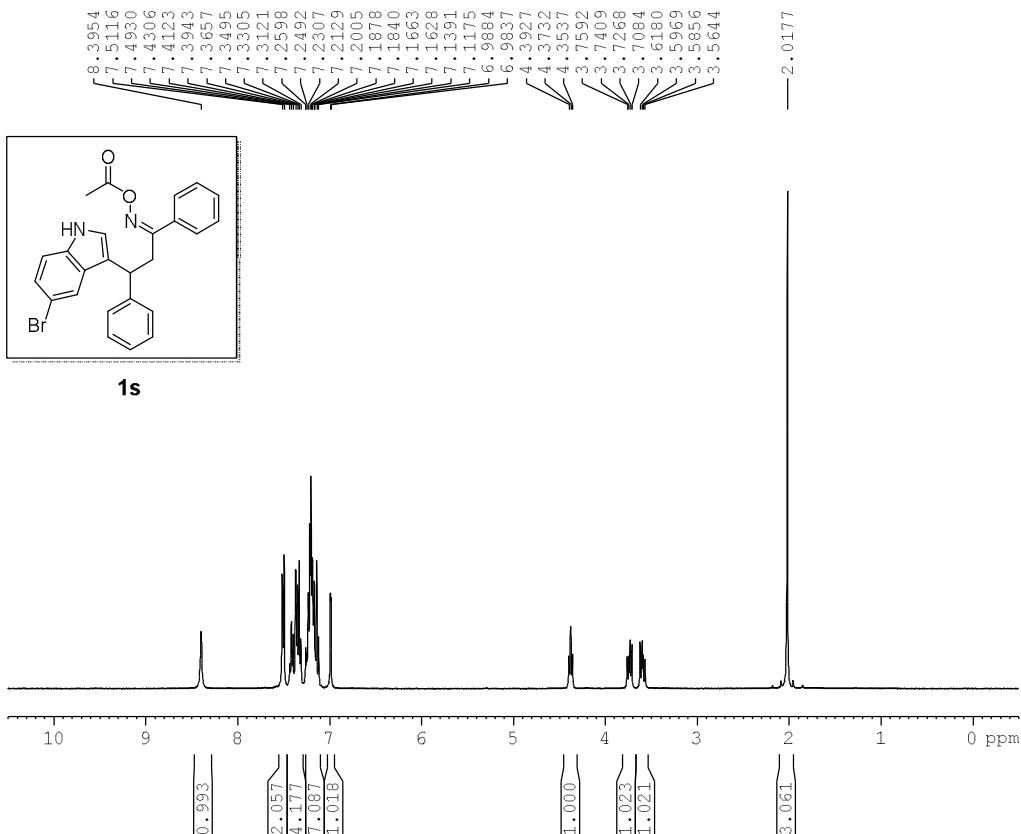

Current Data Parameters  
 NAME S(5-Br indole)  
 EXPNO 51  
 PROCNO 1

F2 - Acquisition Parameters  
 Date\_ 20140225  
 Time 17.30  
 INSTRUM spect  
 PROBHD 5 mm BBO BB-1H  
 PULPROG zg30  
 TD 32768  
 SOLVENT CDCl3  
 NS 16  
 DS 0  
 SWH 7246.377 Hz  
 FIDRES 0.221142 Hz  
 AQ 2.2609921 sec  
 RG 114  
 DW 69.000 usec  
 DE 6.50 usec  
 TE 295.6 K  
 D1 2.0000000 sec  
 TDO 1

===== CHANNEL f1 =====  
 NUC1 1H  
 P1 14.35 usec  
 PL1 -2.00 dB  
 SFO1 400.1324008 MHz

F2 - Processing parameters  
 SI 16384  
 SF 400.1300092 MHz  
 WDW EM  
 SSB 0  
 LB 0 Hz  
 GB 0  
 PC 1.00

(Z)-3-(5-bromo-1H-indol-3-yl)-1,3-diphenylpropan-1-one O-acetyl oxime

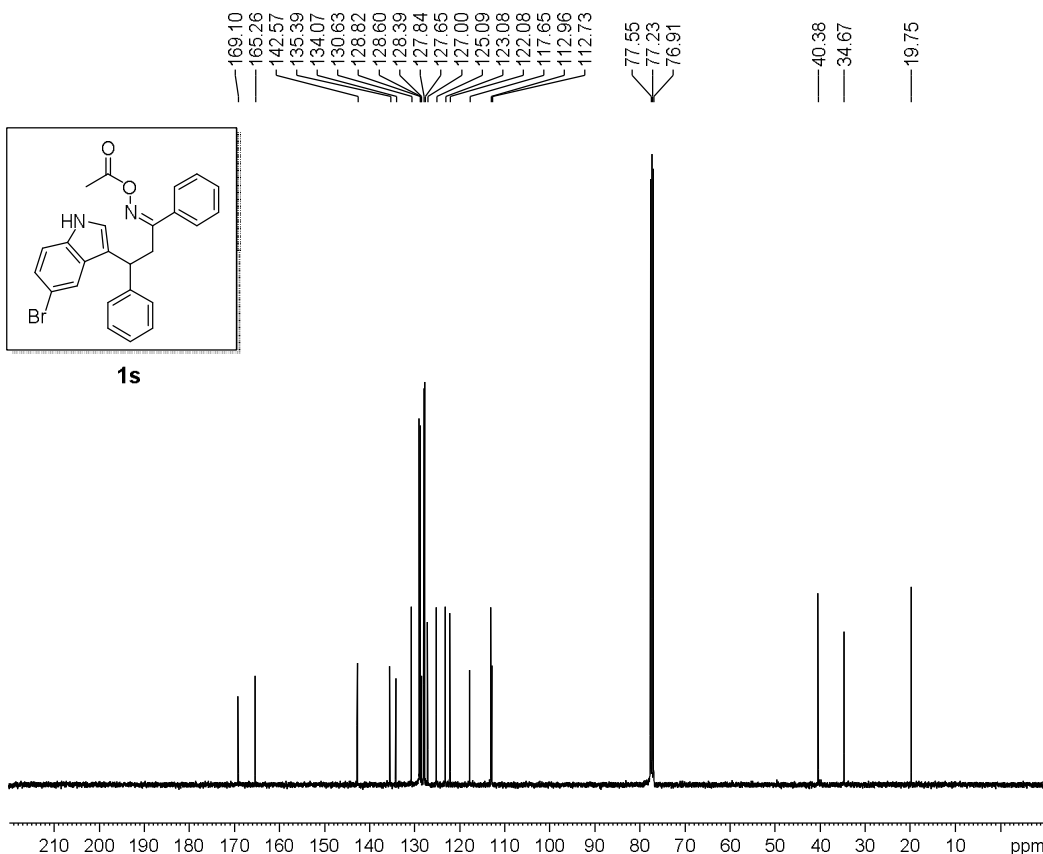

Current Data Parameters  
 NAME S(5-Br indole)  
 EXPNO 513  
 PROCNO 1

F2 - Acquisition Parameters  
 Date\_ 20140226  
 Time 0.17  
 INSTRUM spect  
 PROBHD 5 mm BBO BB-1H  
 PULPROG zgpg30  
 TD 32768  
 SOLVENT CDCl3  
 NS 1581  
 DS 0  
 SWH 24038.461 Hz  
 FIDRES 0.733596 Hz  
 AQ 0.6815744 sec  
 RG 4096  
 DW 20.800 usec  
 DE 6.50 usec  
 TE 296.1 K  
 D1 2.0000000 sec  
 D11 0.03000000 sec  
 TDO 1

===== CHANNEL f1 =====  
 NUC1 13C  
 P1 9.40 usec  
 PL1 7.00 dB  
 SFO1 100.6233325 MHz

===== CHANNEL f2 =====  
 CPDPRG2 waltz16  
 NUC2 1H  
 PCPD2 90.00 usec  
 PL2 -2.00 dB  
 PL12 13.95 dB  
 PL13 17.00 dB  
 SFO2 400.1316005 MHz

F2 - Processing parameters  
 SI 32768  
 SF 100.6127528 MHz  
 WDW EM  
 SSB 0  
 LB 1.00 Hz  
 GB 0  
 PC 1.00

(Z)-3-(5-nitro-1H-indol-3-yl)-1,3-diphenylpropan-1-one O-acetyl oxime

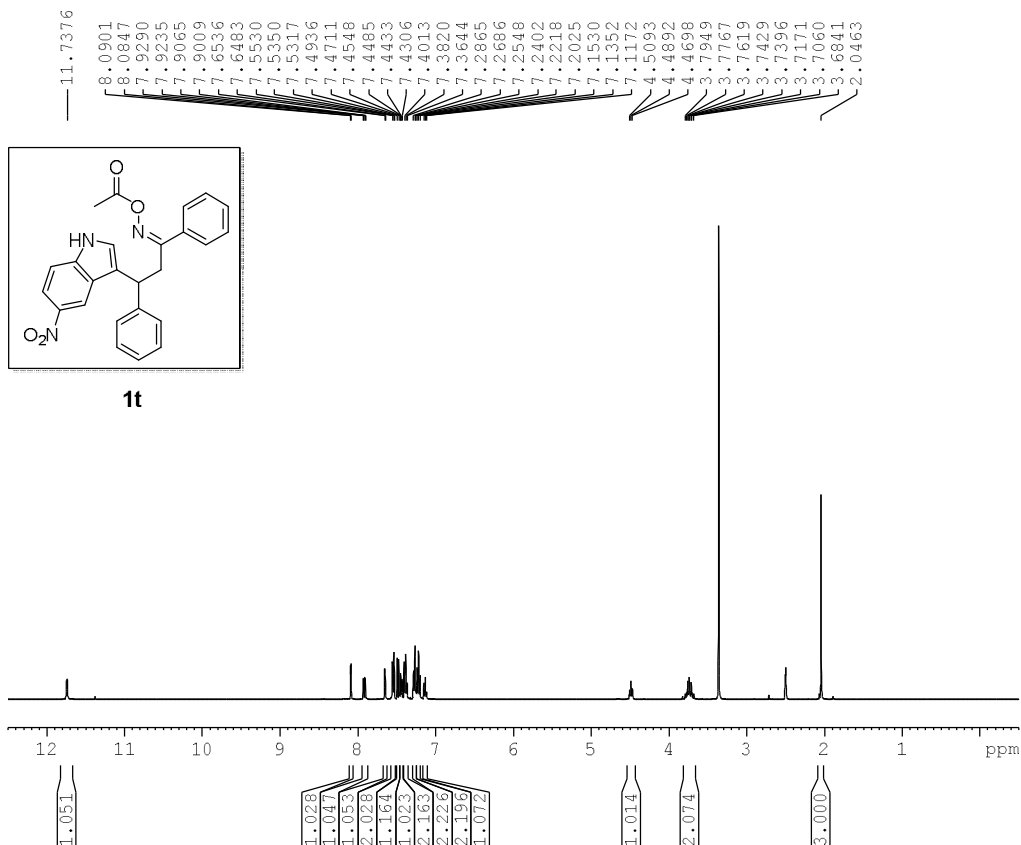

Current Data Parameters  
 NAME T(5-NO2 indole)  
 EXPNO 51  
 PROCNO 1

F2 - Acquisition Parameters  
 Date\_ 20140501  
 Time 22.42  
 INSTRUM spect  
 PROBHD 5 mm PABBO BB/  
 PULPROG zg30  
 TD 32768  
 SOLVENT DMSO  
 NS 16  
 DS 0  
 SWH 7211.539 Hz  
 FIDRES 0.220079 Hz  
 AQ 2.2719147 sec  
 RG 71.42  
 DW 69.353 usec  
 DE 10.52 usec  
 TE 298.0 K  
 D1 2.0000000 sec  
 TDO 1

==== CHANNEL f1 =====  
 SFO1 400.1324008 MHz  
 NUC1 1H  
 P1 12.80 usec  
 PLW1 15.0000000 W

F2 - Processing parameters  
 SI 16384  
 SF 400.1300030 MHz  
 WDW EM  
 SSB 0  
 LB 0 Hz  
 GB 0  
 PC 1.00

(Z)-3-(5-nitro-1H-indol-3-yl)-1,3-diphenylpropan-1-one O-acetyl oxime

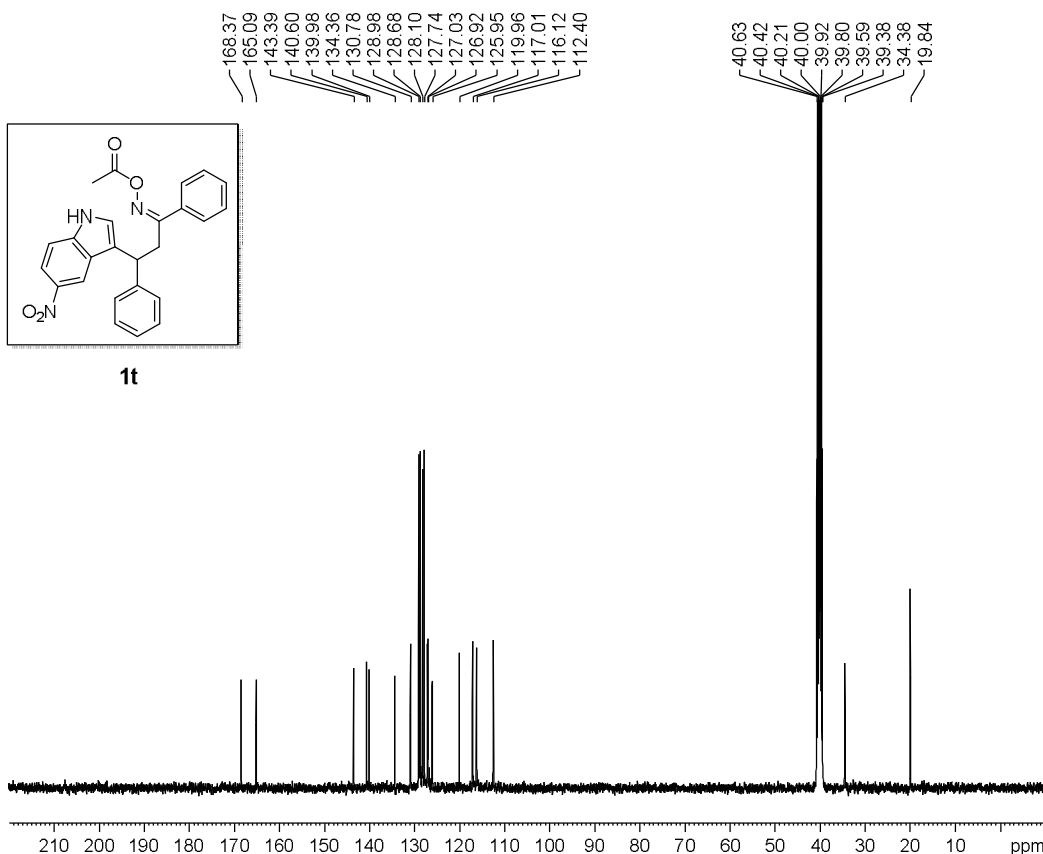

Current Data Parameters  
 NAME T(5-NO2 indole)  
 EXPNO 513  
 PROCNO 1

F2 - Acquisition Parameters  
 Date\_ 20140501  
 Time 22.45  
 INSTRUM spect  
 PROBHD 5 mm PABBO BB/  
 PULPROG zgpg30  
 TD 32768  
 SOLVENT DMSO  
 NS 1500  
 DS 0  
 SWH 24038.461 Hz  
 FIDRES 0.733596 Hz  
 AQ 0.6815744 sec  
 RG 198.09  
 DW 20.900 usec  
 DE 6.50 usec  
 TE 298.0 K  
 D1 2.0000000 sec  
 D11 0.03000000 sec  
 TDO 1

==== CHANNEL f1 =====  
 SFO1 100.6233319 MHz  
 NUC1 13C  
 P1 10.00 usec  
 PLW1 46.0000000 W

==== CHANNEL f2 =====  
 SFO2 400.1316005 MHz  
 NUC2 1H  
 CPDPRG2 waltz16  
 PCPD2 90.00 usec  
 PLW2 15.0000000 W  
 PLW12 0.34252000 W  
 PLW13 0.27744001 W

F2 - Processing parameters  
 SI 32768  
 SF 100.6127685 MHz  
 WDW EM  
 SSB 0  
 LB 2.00 Hz  
 GB 0  
 PC 1.00

(Z)-3-(5-methoxy-1H-indol-3-yl)-1,3-diphenylpropan-1-one O-acetyl oxime

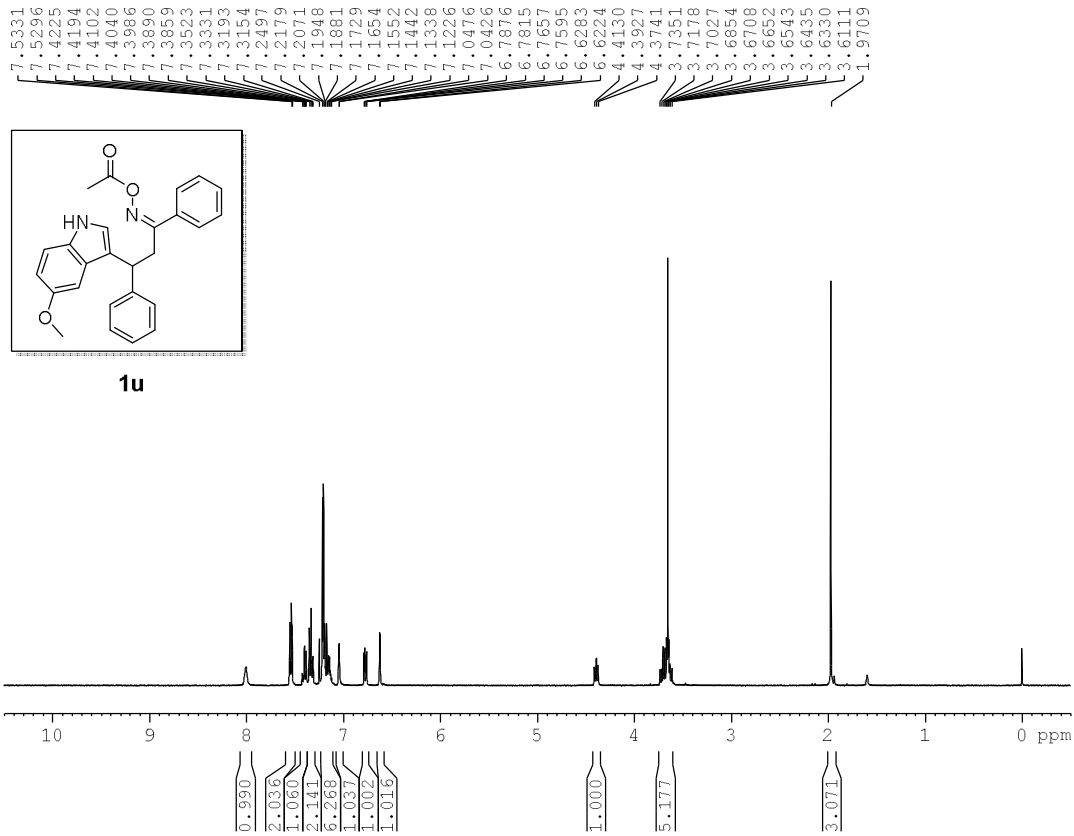

Current Data Parameters  
NAME 20161226  
EXPNO 1  
PROCNO 1

F2 - Acquisition Parameters  
Date\_ 20161228  
Time 16.46  
INSTRUM spect  
PROBHD 5 mm BBO BB-1H  
PULPROG zg30  
TD 32768  
SOLVENT CDCl3  
NS 16  
DS 0  
SWH 7246.377 Hz  
FIDRES 0.221142 Hz  
AQ 2.2609921 sec  
RG 114  
DW 69.000 usec  
DE 6.50 usec  
TE 296.3 K  
D1 2.00000000 sec  
TDO

===== CHANNEL f1 =====  
NUC1 1H  
P1 14.40 usec  
PL1 1.80 dB  
SFO1 400.1324008 MHz

F2 - Processing parameters  
SI 16384  
SF 400.1300135 MHz  
EM  
WDW 0  
SSB 0  
LB 0 Hz  
GB 0  
PC 1.00

(Z)-3-(5-methoxy-1H-indol-3-yl)-1,3-diphenylpropan-1-one O-acetyl oxime

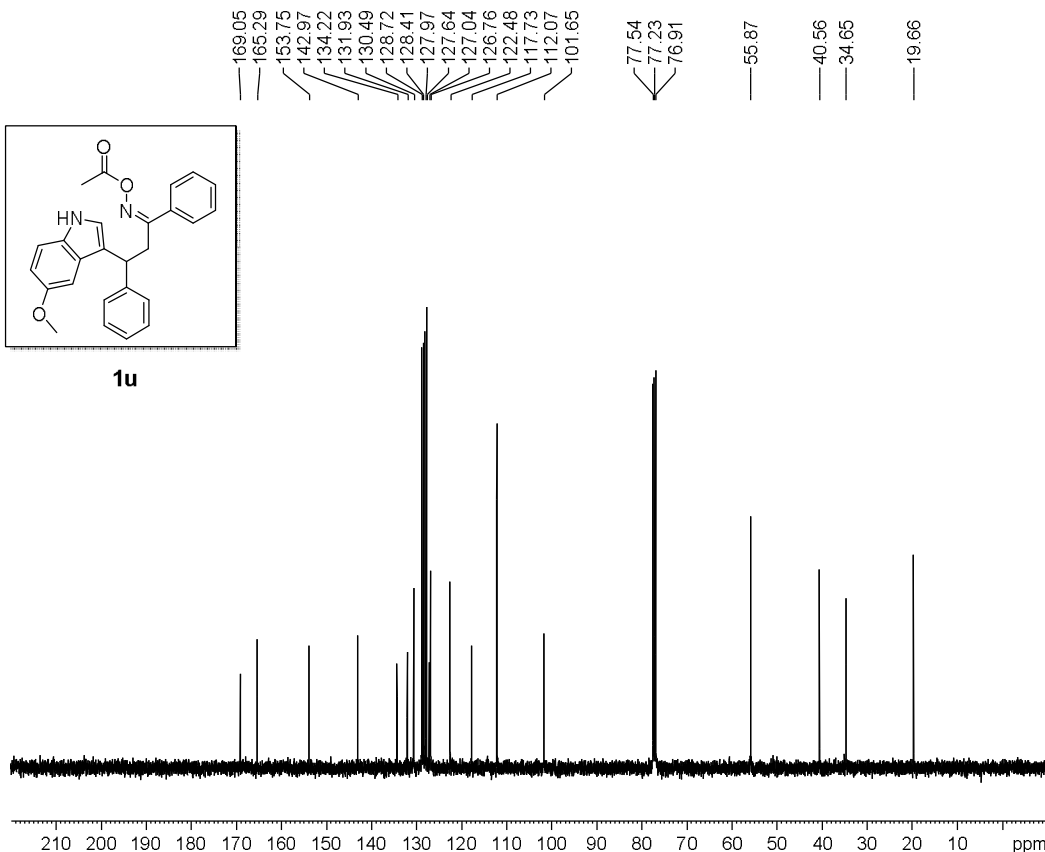

Current Data Parameters  
NAME T(5-OMe indole)  
EXPNO 513  
PROCNO 1

F2 - Acquisition Parameters  
Date\_ 20130123  
Time 17.55  
INSTRUM spect  
PROBHD 5 mm BBO BB-1H  
PULPROG zgpg30  
TD 32768  
SOLVENT CDCl3  
NS 72  
DS 0  
SWH 24038.461 Hz  
FIDRES 0.733596 Hz  
AQ 0.6815744 sec  
RG 2048  
DW 20.800 usec  
DE 6.50 usec  
TE 298.4 K  
D1 2.00000000 sec  
D11 0.03000000 sec  
TDO 1

===== CHANNEL f1 =====  
NUC1 13C  
P1 9.40 usec  
PL1 7.00 dB  
SFO1 100.6233325 MHz

===== CHANNEL f2 =====  
CPDPRG2 waltz16  
NUC2 1H  
PCPD2 90.00 usec  
PL2 3.00 dB  
PL12 20.70 dB  
PL13 23.70 dB  
SFO2 400.1316005 MHz

F2 - Processing parameters  
SI 32768  
SF 100.6127602 MHz  
EM  
WDW 0  
SSB 0  
LB 1.00 Hz  
GB 0  
PC 1.00

2,4-diphenyl- $\alpha$ -carboline

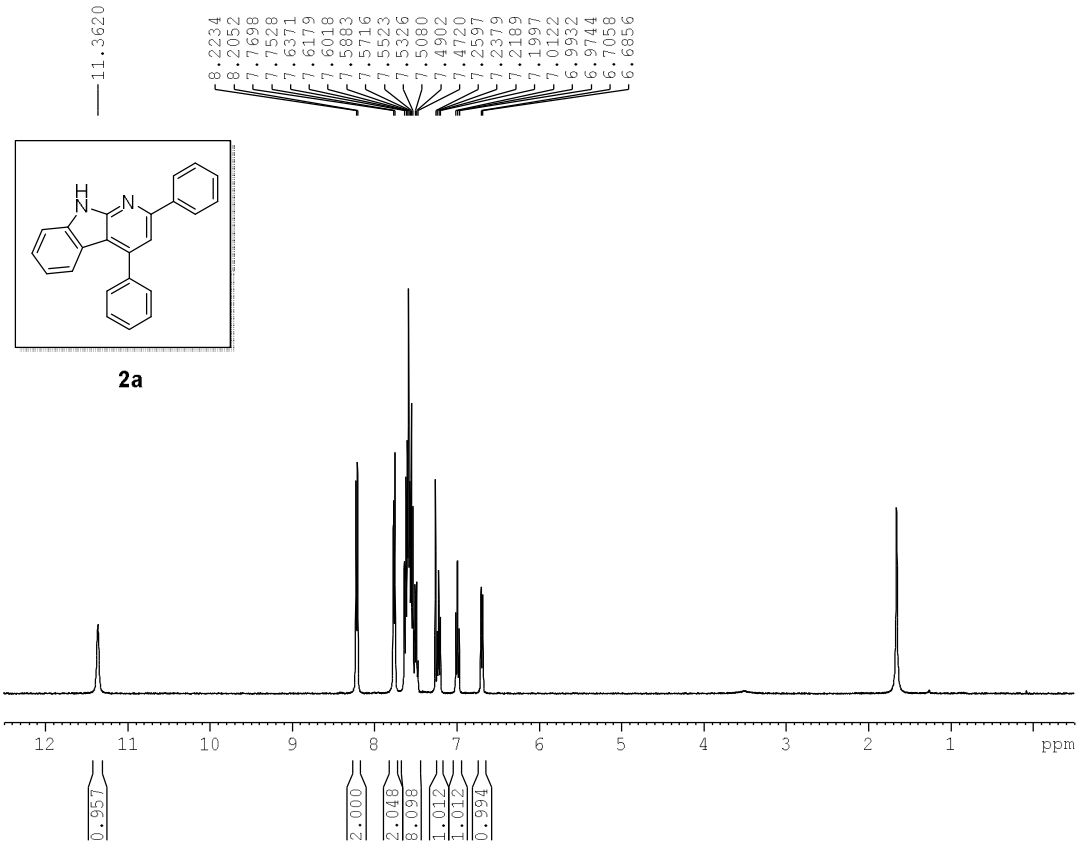

Current Data Parameters  
 NAME 20161108  
 EXPNO 3  
 PROCNO 1

F2 - Acquisition Parameters  
 Date\_ 20161108  
 Time\_ 0.37  
 INSTRUM spect  
 PROBHD 5 mm BBO BB-1H  
 PULPROG zg30  
 TD 32768  
 SOLVENT CDCl3  
 NS 16  
 DS 0  
 SWH 7246.377 Hz  
 FIDRES 0.221142 Hz  
 AQ 2.2609921 sec  
 RG 114  
 DW 69.000 usec  
 DE 6.50 usec  
 TE 295.8 K  
 D1 2.0000000 sec  
 TDO 1

===== CHANNEL f1 =====  
 NUC1 1H  
 P1 14.40 usec  
 PL1 1.80 dB  
 SFO1 400.1324008 MHz

F2 - Processing parameters  
 SI 16584  
 SF 400.1300095 MHz  
 WDW EM  
 SSB 0  
 LB 0 Hz  
 GB 0  
 PC 1.00

2,4-diphenyl- $\alpha$ -carboline

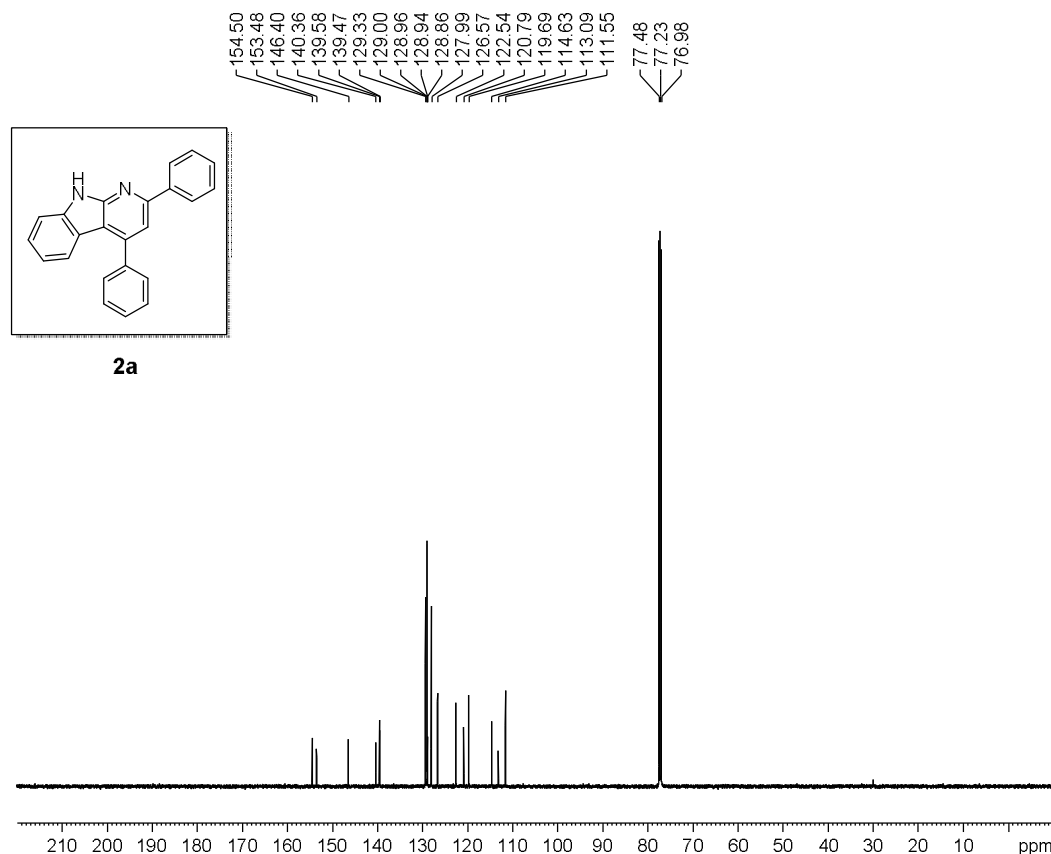

Current Data Parameters  
 NAME A(no substrate)  
 EXPNO 613  
 PROCNO 1

F2 - Acquisition Parameters  
 Date\_ 20121003  
 Time\_ 19.15  
 INSTRUM spect  
 PROBHD 5 mm PABBO BB-  
 PULPROG zgpg30  
 TD 65536  
 SOLVENT CDCl3  
 NS 1024  
 DS 0  
 SWH 30030.029 Hz  
 FIDRES 0.458222 Hz  
 AQ 1.0911744 sec  
 RG 8192  
 DW 16.650 usec  
 DE 6.50 usec  
 TE 300.0 K  
 D1 2.0000000 sec  
 D11 0.0300000 sec  
 TDO 1

===== CHANNEL f1 =====  
 NUC1 13C  
 P1 10.00 usec  
 PL1 6.50 dB  
 SFO1 125.7709931 MHz

===== CHANNEL f2 =====  
 CPDPRG2 waltz16  
 NUC2 1H  
 PCPD2 90.00 usec  
 PL2 -0.60 dB  
 PL12 15.20 dB  
 PL13 18.20 dB  
 SFO2 500.1320005 MHz

F2 - Processing parameters  
 SI 65536  
 SF 125.7577646 MHz  
 WDW EM  
 SSB 0  
 LB 1.00 Hz  
 GB 0  
 PC 1.00

4-(2-fluorophenyl)-2-phenyl- $\alpha$ -carboline

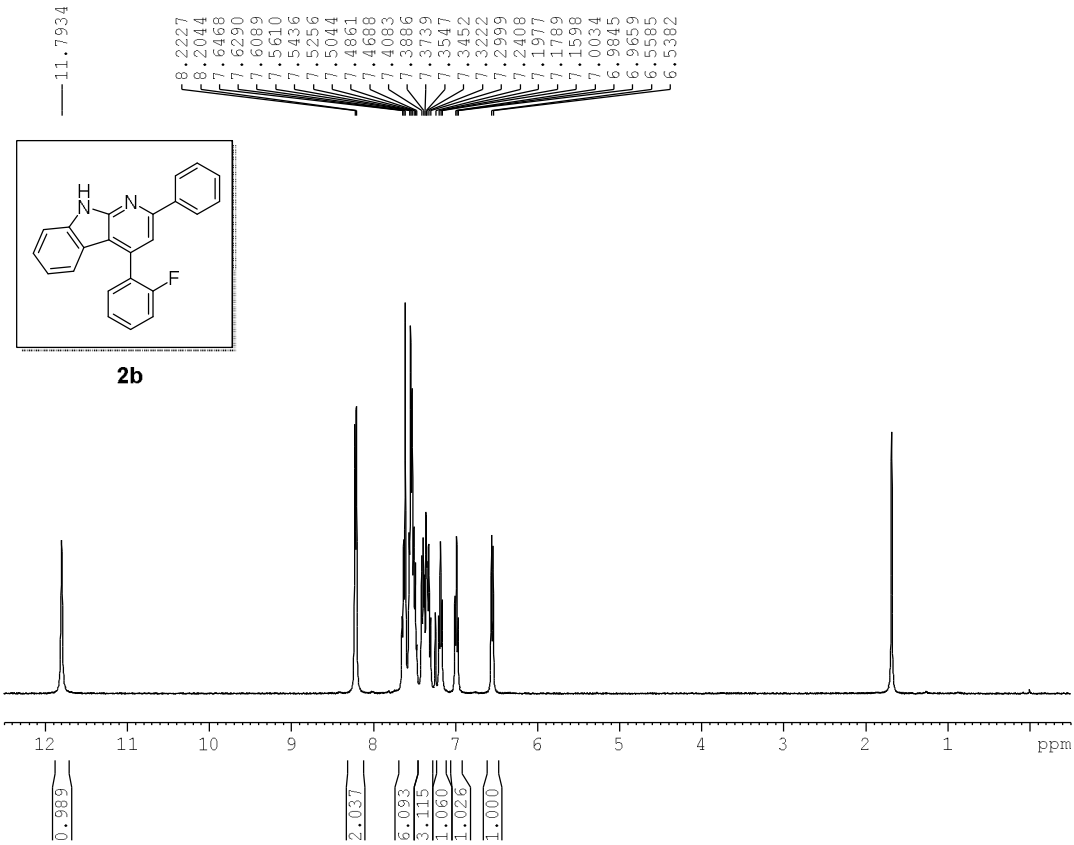

Current Data Parameters  
 NAME B(2-F chalcone)  
 EXPNO 61  
 PROCNO 1

F2 - Acquisition Parameters  
 Date\_ 20161025  
 Time 19.38  
 INSTRUM spect  
 PROBHD 5 mm PABBO BB/  
 PULPROG zg30  
 TD 32768  
 SOLVENT CDCl3  
 NS 16  
 DS 0  
 SWH 7211.539 Hz  
 FIDRES 0.220079 Hz  
 AQ 2.2719147 sec  
 RG 4.01  
 DW 69.333 usec  
 DE 10.50 usec  
 TE 298.0 K  
 D1 2.0000000 sec  
 TDO 1

==== CHANNEL f1 =====  
 SFO1 400.1324009 MHz  
 NUC1 1H  
 P1 12.90 usec  
 PLW1 15.00000000 W

F2 - Processing parameters  
 SI 16584  
 SF 400.1300180 MHz  
 WDW EM  
 SSB 0  
 LB 0 Hz  
 GB 0  
 PC 1.00

4-(2-fluorophenyl)-2-phenyl- $\alpha$ -carboline

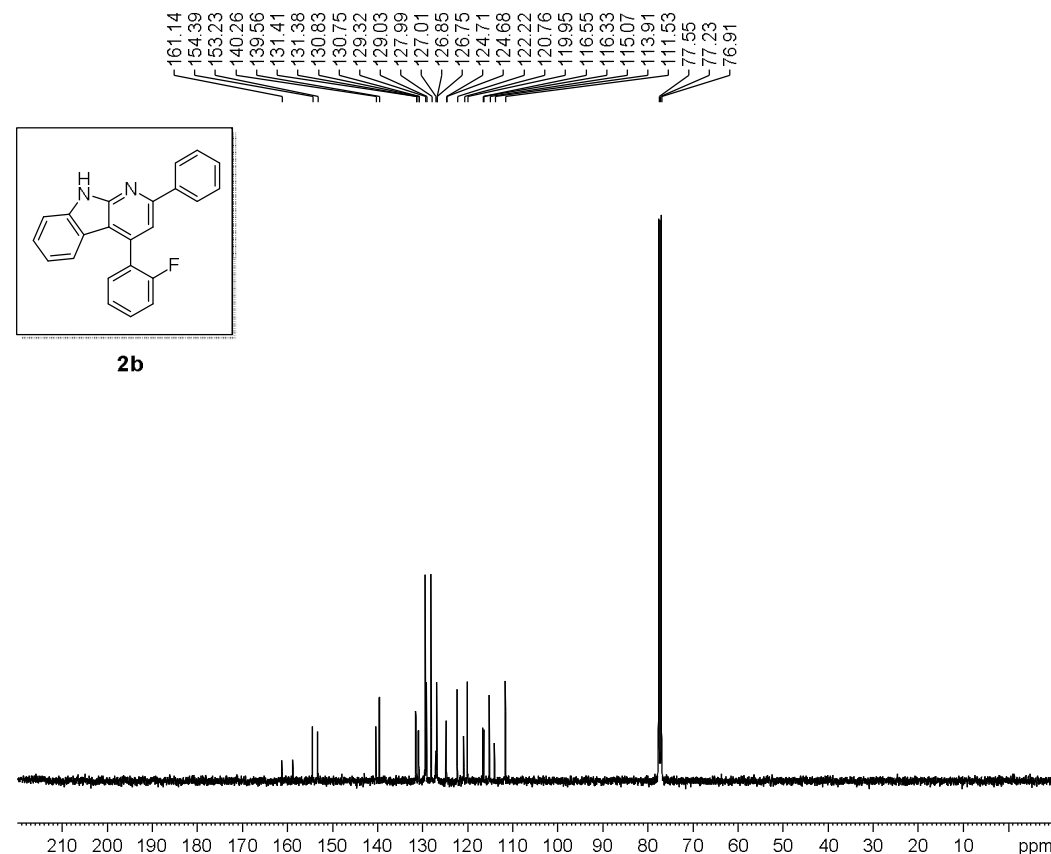

Current Data Parameters  
 NAME B(2-F chalcone)  
 EXPNO 613  
 PROCNO 1

F2 - Acquisition Parameters  
 Date\_ 20161021  
 Time 19.42  
 INSTRUM spect  
 PROBHD 5 mm PABBO BB/  
 PULPROG zgpg30  
 TD 32768  
 SOLVENT CDCl3  
 NS 524  
 DS 0  
 SWH 24038.461 Hz  
 FIDRES 0.733596 Hz  
 AQ 0.6815744 sec  
 RG 198.09  
 DW 20.900 usec  
 DE 6.50 usec  
 TE 298.0 K  
 D1 2.0000000 sec  
 D11 0.03000000 sec  
 TDO 1

==== CHANNEL f1 =====  
 SFO1 100.6228298 MHz  
 NUC1 13C  
 P1 10.00 usec  
 PLW1 47.50000000 W

==== CHANNEL f2 =====  
 SFO2 400.1316005 MHz  
 NUC2 1H  
 CPDPRG2 waltz16  
 PCPD2 90.00 usec  
 PLW2 15.00000000 W  
 PLW12 0.33750001 W  
 PLW13 0.27338001 W

F2 - Processing parameters  
 SI 32768  
 SF 100.6127482 MHz  
 WDW EM  
 SSB 0  
 LB 2.00 Hz  
 GB 0  
 PC 1.00

4-(2-chlorophenyl)-2-phenyl- $\alpha$ -carboline

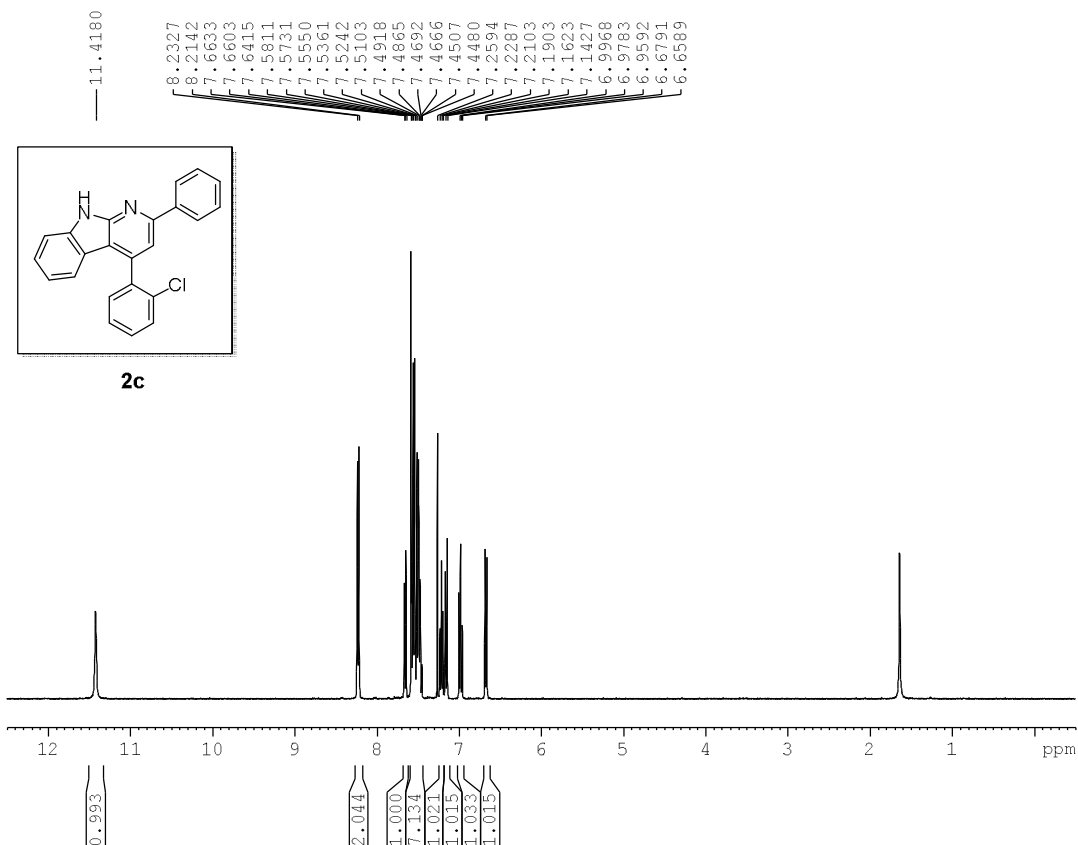

Current Data Parameters  
 NAME C(2-Cl chalcone)  
 EXPNO 61  
 PROCNO 1

F2 - Acquisition Parameters  
 Date\_ 20161104  
 Time 18:57  
 INSTRUM spect  
 PROBHD 5 mm PABBO BB/  
 PULPROG zg30  
 TD 32768  
 SOLVENT CDCl3  
 NS 16  
 DS 0  
 SWH 7211.539 Hz  
 FIDRES 0.220079 Hz  
 AQ 2.2719147 sec  
 RG 4.01  
 DW 69.333 usec  
 DE 10.50 usec  
 TE 298.2 K  
 D1 2.0000000 sec  
 TDO 1

==== CHANNEL f1 =====  
 SFO1 400.1304009 MHz  
 NUC1 1H  
 P1 12.90 usec  
 PLW1 15.00000000 W

F2 - Processing parameters  
 SI 16584  
 SF 400.1300104 MHz  
 WDW EM  
 SSB 0  
 LB 0 Hz  
 GB 0  
 PC 1.00

4-(2-chlorophenyl)-2-phenyl- $\alpha$ -carboline

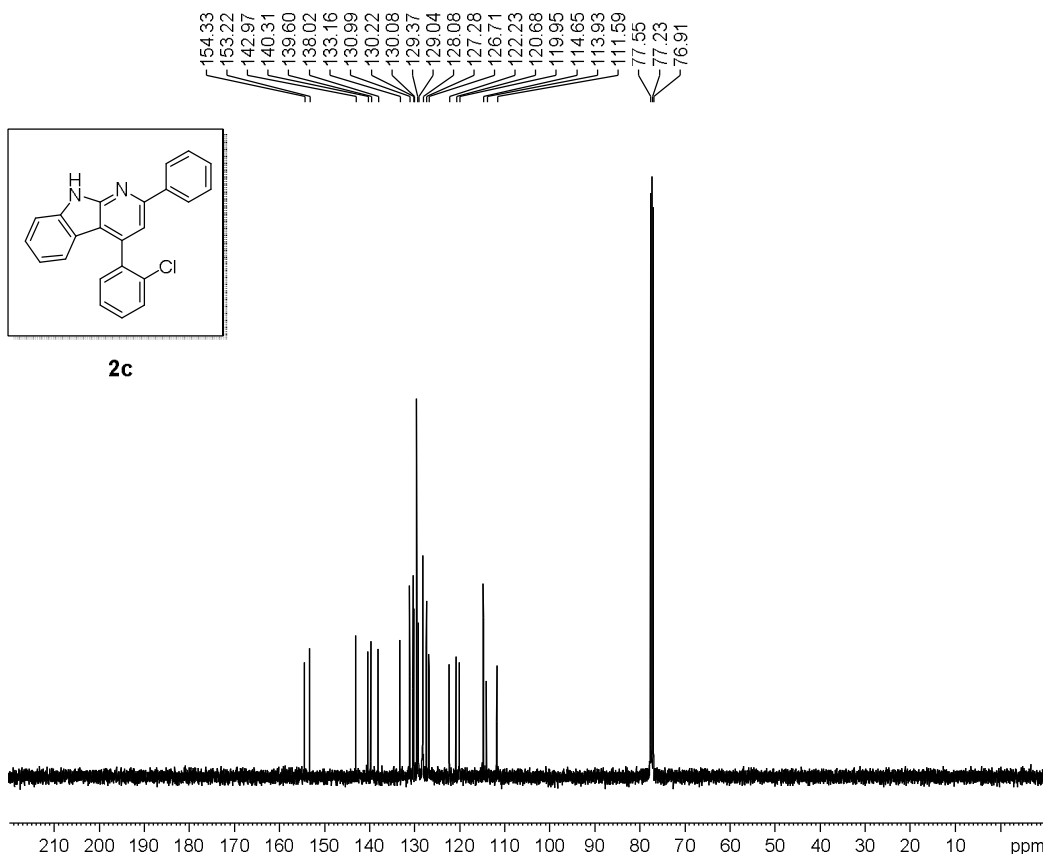

Current Data Parameters  
 NAME C(2-Cl chalcone)  
 EXPNO 613  
 PROCNO 1

F2 - Acquisition Parameters  
 Date\_ 20141121  
 Time 10:53  
 INSTRUM spect  
 PROBHD 5 mm BBO BB-1H  
 PULPROG zgpg30  
 TD 32768  
 SOLVENT CDCl3  
 NS 504  
 DS 0  
 SWH 24038.461 Hz  
 FIDRES 0.733596 Hz  
 AQ 0.6815744 sec  
 RG 8192  
 DW 20.800 usec  
 DE 6.50 usec  
 TE 298.8 K  
 D1 2.0000000 sec  
 D11 0.03000000 sec  
 TDO 1

==== CHANNEL f1 =====  
 NUC1 13C  
 P1 10.50 usec  
 PL1 7.00 dB  
 SFO1 100.6233325 MHz

==== CHANNEL f2 =====  
 CPDPRG2 waltz16  
 NUC2 1H  
 PCPD2 90.00 usec  
 PL2 -0.60 dB  
 PL12 15.00 dB  
 PL13 18.00 dB  
 SFO2 400.1316005 MHz

F2 - Processing parameters  
 SI 32768  
 SF 100.6127469 MHz  
 WDW EM  
 SSB 0  
 LB 1.00 Hz  
 GB 0  
 PC 1.00



4-(2-bromophenyl)-2-phenyl- $\alpha$ -carboline

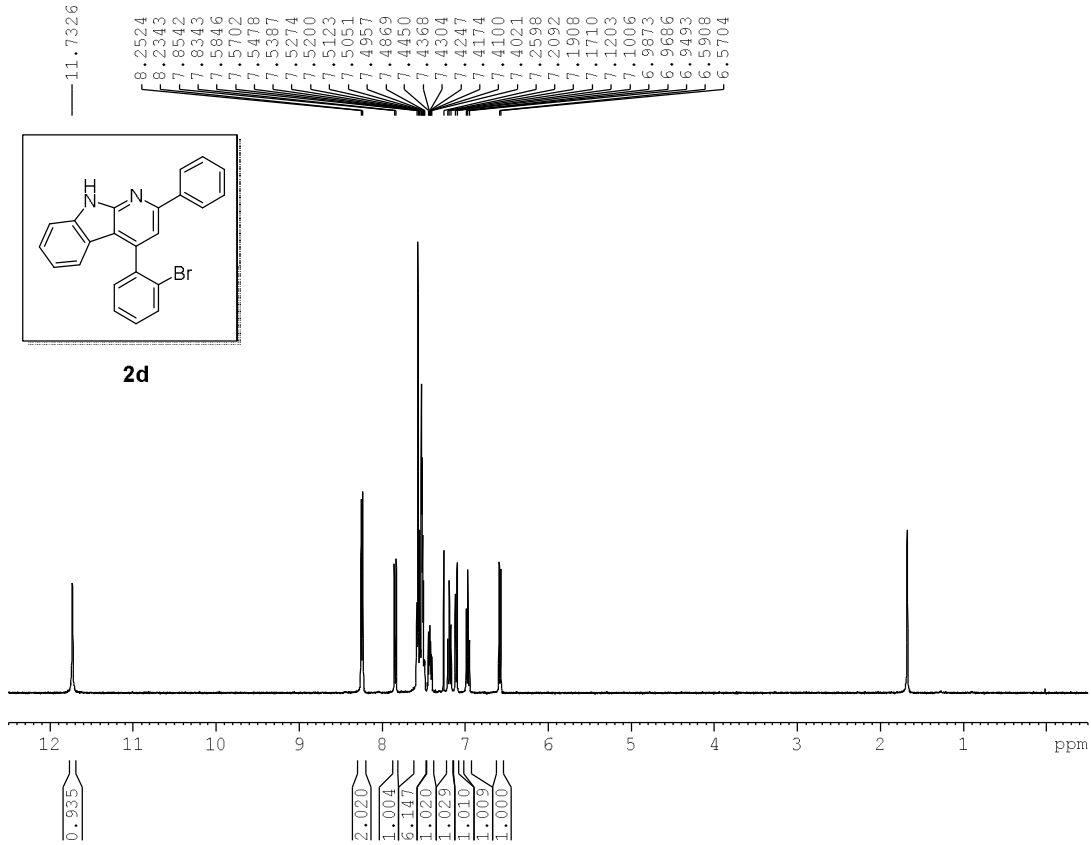

```

Current Data Parameters
NAME      D(2-Br chalcone)
EXPNO    61
PROCNO   1

F2 - Acquisition Parameters
Date_    20161026
Time     17.22
INSTRUM spect
PROBHD   5 mm PABBO BB/
PULPROG zg30
TD       32768
SOLVENT  CDCl3
NS       1
DS       0
SWH      7211.539 Hz
FIDRES   0.220079 Hz
AQ       2.2719147 sec
RG       113.31
DW       69.333 usec
DE       10.50 usec
TE       298.1 K
D1       2.0000000 sec
TDO      1

===== CHANNEL f1 =====
SFO1    400.1324009 MHz
NUC1     1H
P1      12.90 usec
PLW1    15.00000000 W

F2 - Processing parameters
SI      16584
SF      400.1300102 MHz
WDW     EM
SSB     0
LB      0 Hz
GB      0
PC      1.00
    
```

4-(2-bromophenyl)-2-phenyl- $\alpha$ -carboline

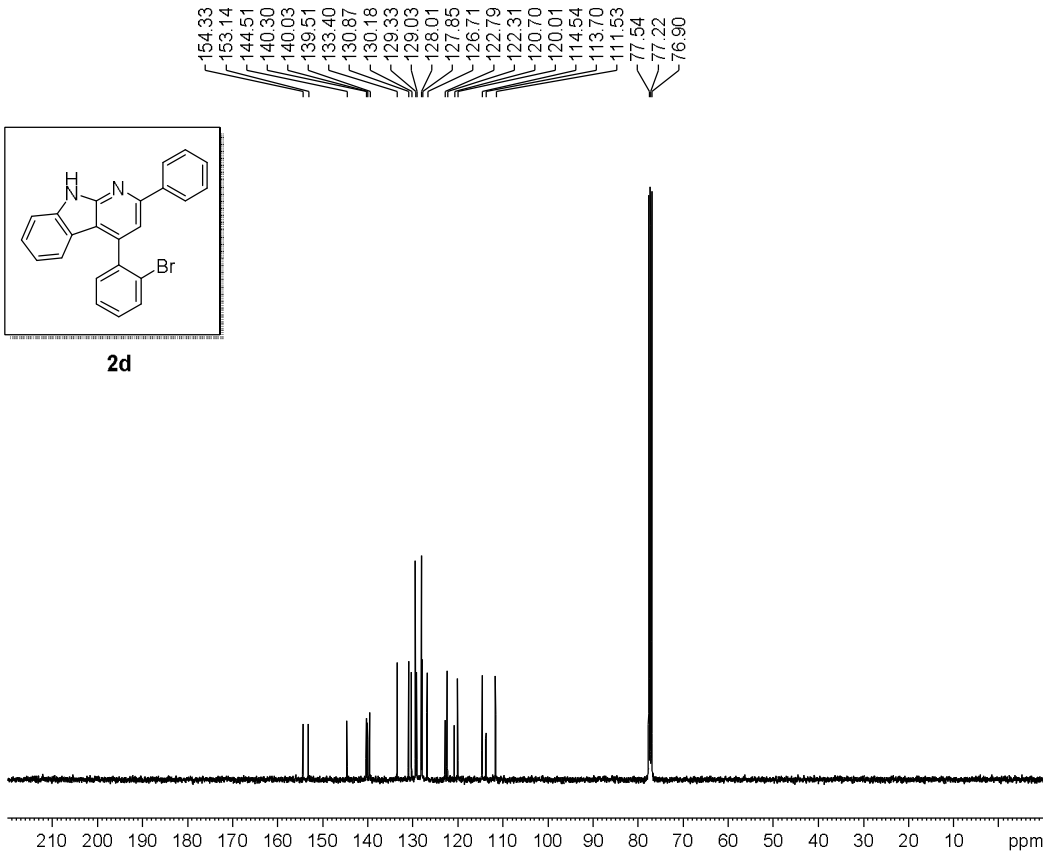

```

Current Data Parameters
NAME      D(2-Br chalcone)
EXPNO    613
PROCNO   1

F2 - Acquisition Parameters
Date_    20161026
Time     17.24
INSTRUM spect
PROBHD   5 mm PABBO BB/
PULPROG zgpg30
TD       32768
SOLVENT  CDCl3
NS       870
DS       0
SWH      24038.461 Hz
FIDRES   0.733596 Hz
AQ       0.6815744 sec
RG       198.09
DW       20.900 usec
DE       6.50 usec
TE       298.7 K
D1       2.0000000 sec
D11     0.03000000 sec
TDO      1

===== CHANNEL f1 =====
SFO1    100.6228298 MHz
NUC1     13C
P1      10.00 usec
PLW1    47.50000000 W

===== CHANNEL f2 =====
SFO2    400.1316005 MHz
NUC2     1H
CPDPRG2 waltz16
PCPD2   90.00 usec
PLW2    15.00000000 W
PLW12   0.33750001 W
PLW13   0.27338001 W

F2 - Processing parameters
SI      32768
SF      100.6127497 MHz
WDW     EM
SSB     0
LB      2.00 Hz
GB      0
PC      1.00
    
```

4-(naphthalen-1-yl)-2-phenyl- $\alpha$ -carboline

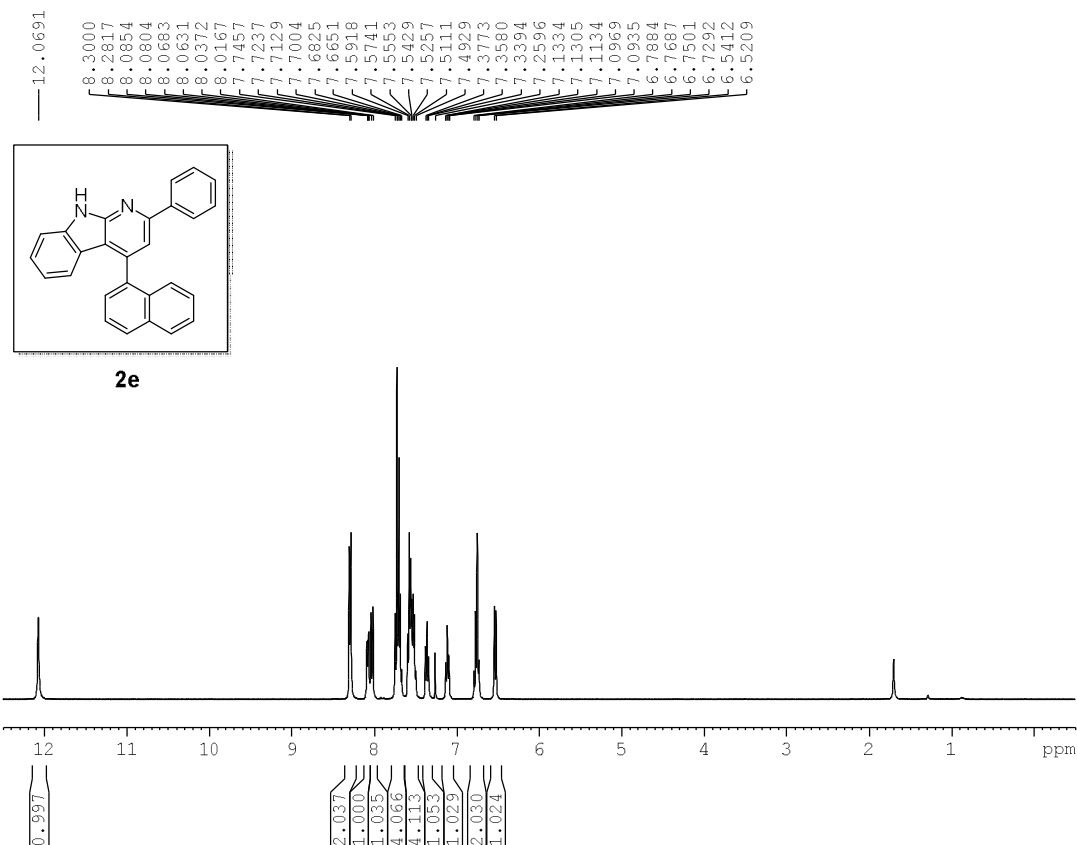

Current Data Parameters  
NAME E(1-naphthyl chalcone)  
EXPNO 61  
PROCNO 1

F2 - Acquisition Parameters  
Date\_ 20150113  
Time 17.07  
INSTRUM spect  
PROBHD 5 mm PABBO BB/  
PULPROG zg30  
TD 32768  
SOLVENT CDCl3  
NS 16  
DS 0  
SWH 7211.539 Hz  
FIDRES 0.220079 Hz  
AQ 2.2719147 sec  
RG 89.08  
DW 69.333 usec  
DE 10.52 usec  
TE 297.4 K  
D1 2.0000000 sec  
TDO 1

==== CHANNEL f1 =====  
SFO1 400.1324009 MHz  
NUC1 1H  
P1 12.80 usec  
PLW1 15.00000000 W  
F2 - Processing parameters  
SI 16584  
SF 400.1300091 MHz  
EM  
WDW 0  
SSB 0  
LB 0 Hz  
GB 0  
PC 1.00

4-(naphthalen-1-yl)-2-phenyl- $\alpha$ -carboline

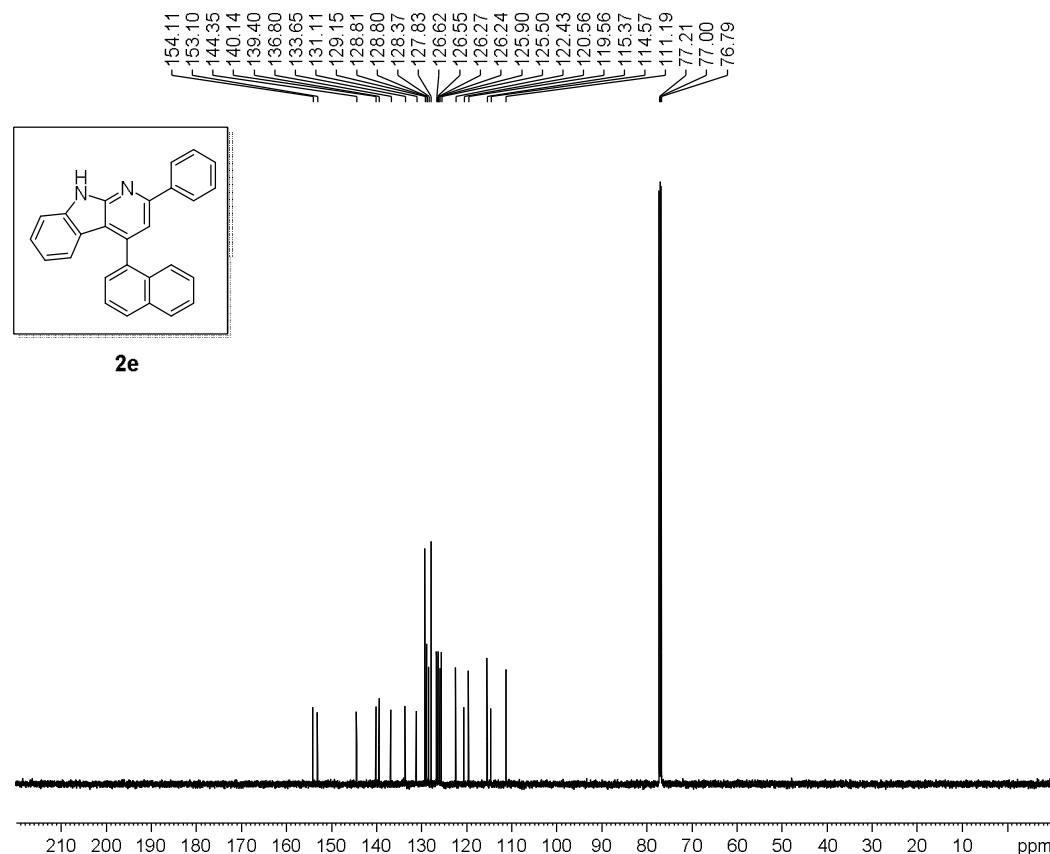

Current Data Parameters  
NAME E(1-naphthyl chalcone)  
EXPNO 613  
PROCNO 1

F2 - Acquisition Parameters  
Date\_ 20150116  
Time 15.31  
INSTRUM spect  
PROBHD 5 mm PATBO BB-  
PULPROG zgpg30  
TD 65536  
SOLVENT CDCl3  
NS 200  
DS 0  
SWH 36057.691 Hz  
FIDRES 0.550197 Hz  
AQ 0.9087659 sec  
RG 2050  
DW 13.957 usec  
DE 6.50 usec  
TE 300.3 K  
D1 2.0000000 sec  
D11 0.03000000 sec  
TDO 1

==== CHANNEL f1 =====  
SFO1 150.9287115 MHz  
NUC1 13C  
P1 10.80 usec  
PLW1 50.00000000 W  
==== CHANNEL f2 =====  
SFO2 600.1724007 MHz  
NUC2 1H  
CPDPRG2 waltz64  
PCPD2 70.00 usec  
PLW2 30.00000000 W  
PLW12 1.03470004 W  
PLW13 0.50700003 W

F2 - Processing parameters  
SI 65536  
SF 150.9128737 MHz  
EM  
WDW 0  
SSB 0  
LB 1.00 Hz  
GB 0  
PC 1.00

4-(2-nitrophenyl)-2-phenyl- $\alpha$ -carboline

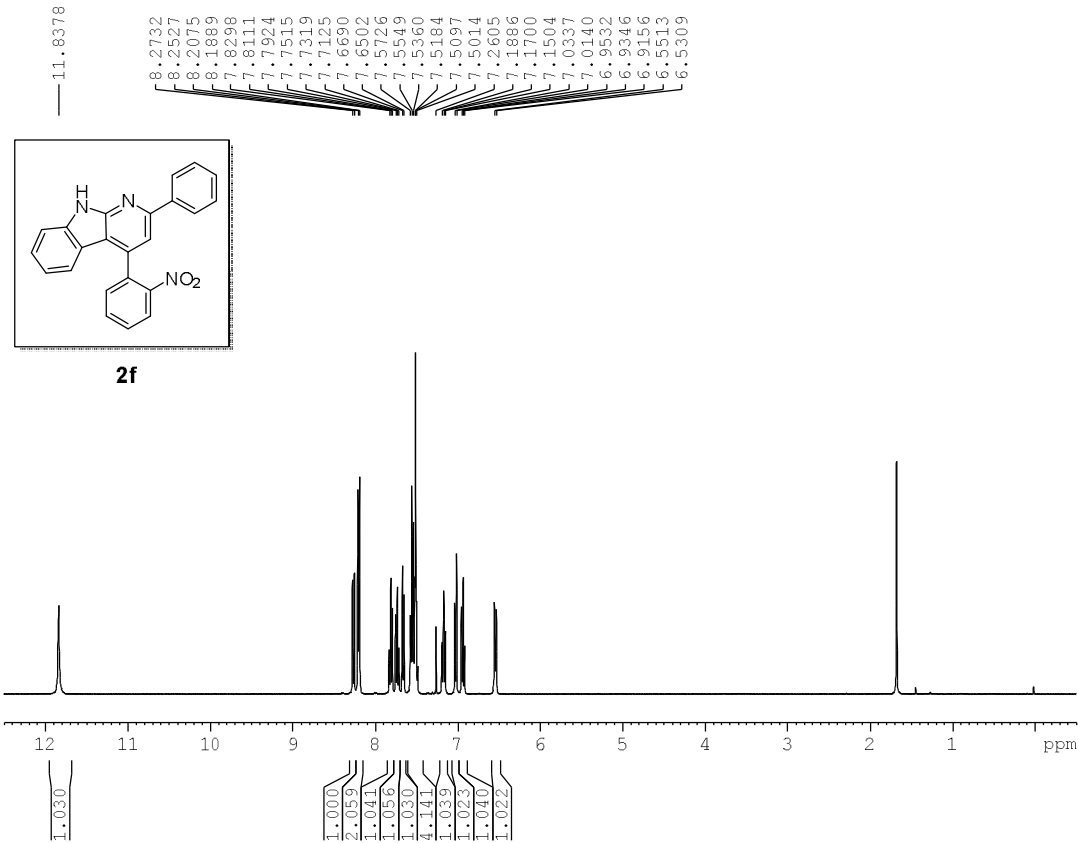

Current Data Parameters  
 NAME F(2-NO2 chalcone)  
 EXPNO 61  
 PROCNO 1

F2 - Acquisition Parameters  
 Date\_ 20161022  
 Time 18.32  
 INSTRUM spect  
 PROBHD 5 mm PABBO BB/  
 PULPROG zg30  
 TD 32768  
 SOLVENT CDCl3  
 NS 16  
 DS 0  
 SWH 7211.539 Hz  
 FIDRES 0.220079 Hz  
 AQ 2.2719147 sec  
 RG 113.31  
 DW 69.333 usec  
 DE 10.50 usec  
 TE 298.5 K  
 D1 2.0000000 sec  
 TDO 1

==== CHANNEL f1 =====  
 SFO1 400.1324009 MHz  
 NUC1 1H  
 P1 12.90 usec  
 PLW1 15.00000000 W

F2 - Processing parameters  
 SI 16384  
 SF 400.1300101 MHz  
 WDW EM  
 SSB 0  
 LB 0 Hz  
 GB 0  
 PC 1.00

4-(2-nitrophenyl)-2-phenyl- $\alpha$ -carboline

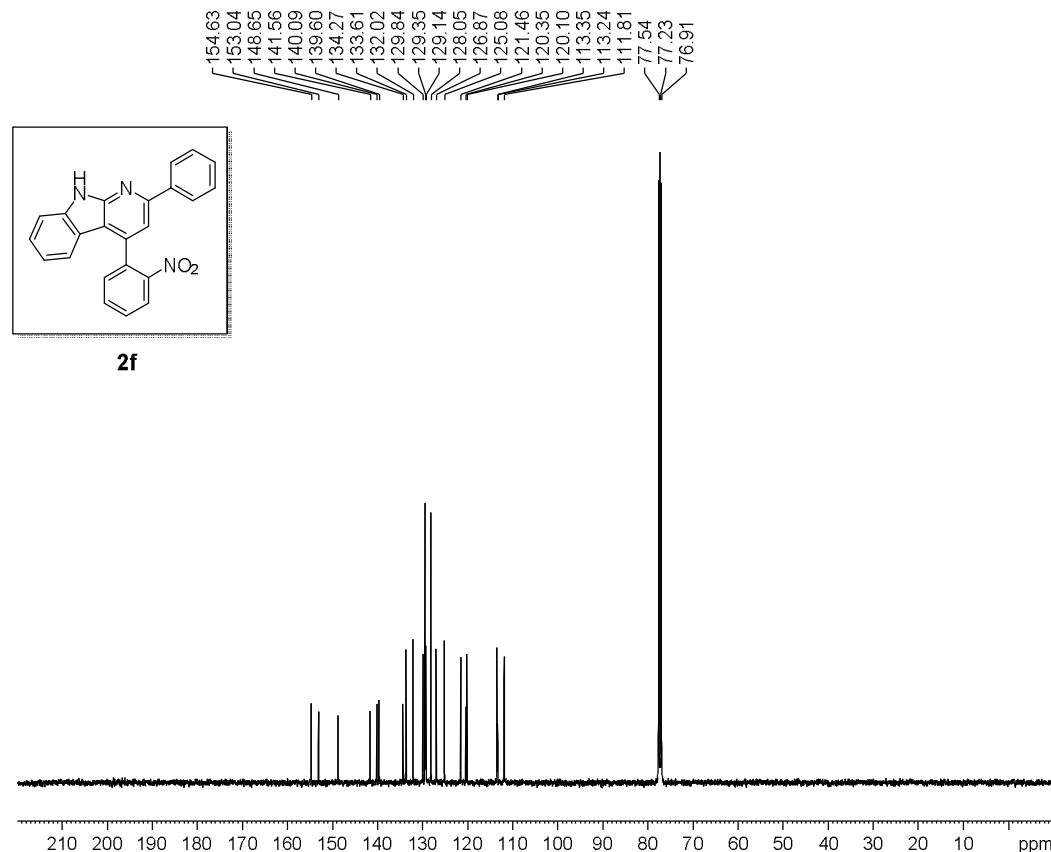

Current Data Parameters  
 NAME F(2-NO2 chalcone)  
 EXPNO 613  
 PROCNO 1

F2 - Acquisition Parameters  
 Date\_ 20161022  
 Time 18.39  
 INSTRUM spect  
 PROBHD 5 mm PABBO BB/  
 PULPROG zgpg30  
 TD 32768  
 SOLVENT CDCl3  
 NS 1163  
 DS 0  
 SWH 24038.461 Hz  
 FIDRES 0.733596 Hz  
 AQ 0.6815744 sec  
 RG 198.09  
 DW 20.900 usec  
 DE 6.50 usec  
 TE 299.4 K  
 D1 2.0000000 sec  
 D11 0.03000000 sec  
 TDO 1

==== CHANNEL f1 =====  
 SFO1 100.6228298 MHz  
 NUC1 13C  
 P1 10.00 usec  
 PLW1 47.50000000 W

==== CHANNEL f2 =====  
 SFO2 400.1316005 MHz  
 NUC2 1H  
 CPDPRG2 waltz16  
 PCPD2 90.00 usec  
 PLW2 15.00000000 W  
 PLW12 0.33750001 W  
 PLW13 0.27338001 W

F2 - Processing parameters  
 SI 32768  
 SF 100.6127486 MHz  
 WDW EM  
 SSB 0  
 LB 2.00 Hz  
 GB 0  
 PC 1.00

4-(3-methoxyphenyl)-2-phenyl- $\alpha$ -carboline

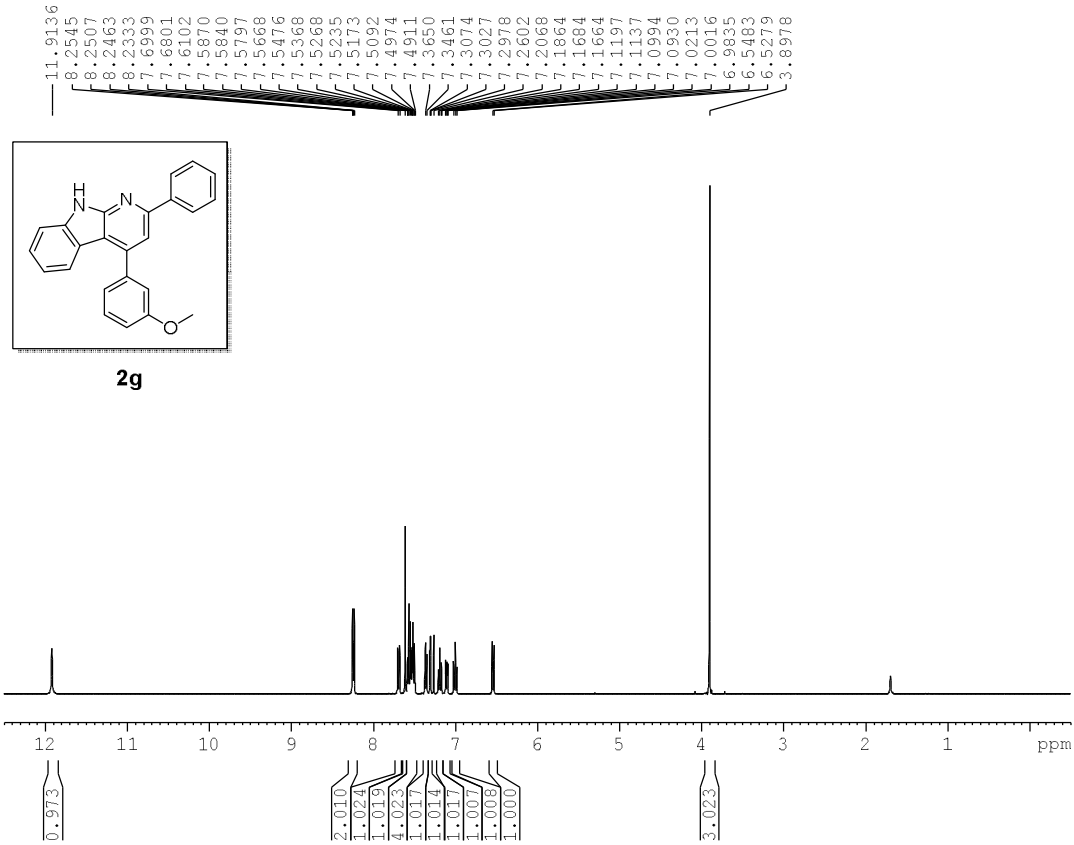

Current Data Parameters  
 NAME G(3-OMe chalcone)  
 EXPNO 61  
 PROCNO 1

F2 - Acquisition Parameters  
 Date\_ 20150802  
 Time 20.32  
 INSTRUM spect  
 PROBHD 5 mm BBO BB-1H  
 PULPROG zg30  
 TD 32768  
 SOLVENT CDCl3  
 NS 8  
 DS 0  
 SWH 7246.377 Hz  
 FIDRES 0.221142 Hz  
 AQ 2.2609921 sec  
 RG 114  
 DW 69.000 usec  
 DE 6.50 usec  
 TE 297.0 K  
 D1 2.00000000 sec  
 TDO 1

===== CHANNEL f1 =====  
 NUC1 1H  
 P1 15.00 usec  
 PL1 5.30 dB  
 SFO1 400.1324008 MHz

F2 - Processing parameters  
 SI 18584  
 SF 400.1300091 MHz  
 WDW EM  
 SSB 0  
 LB 0 Hz  
 GB 0  
 PC 1.00

4-(3-methoxyphenyl)-2-phenyl- $\alpha$ -carboline

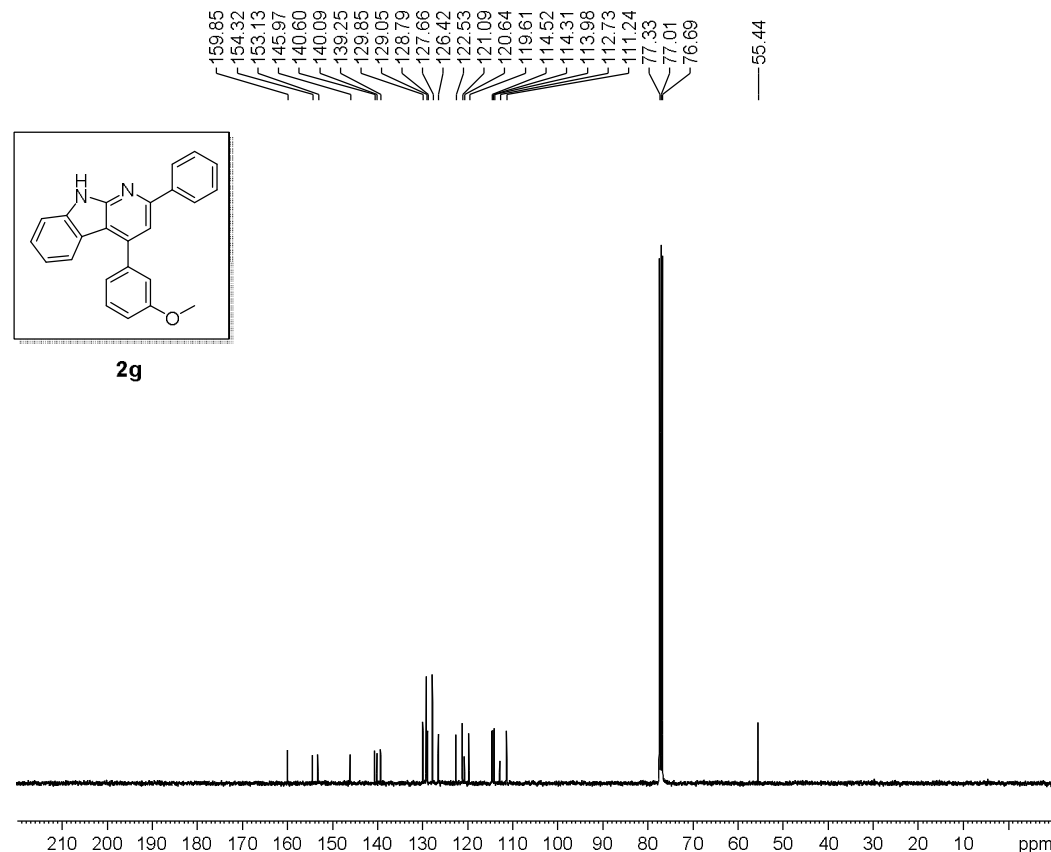

Current Data Parameters  
 NAME G(3-OMe chalcone)  
 EXPNO 613  
 PROCNO 1

F2 - Acquisition Parameters  
 Date\_ 20150831  
 Time 17.05  
 INSTRUM spect  
 PROBHD 5 mm PABBO BB/  
 PULPROG zgpg30  
 TD 32768  
 SOLVENT CDCl3  
 NS 1213  
 DS 0  
 SWH 24038.461 Hz  
 FIDRES 0.733596 Hz  
 AQ 0.6815744 sec  
 RG 198.09  
 DW 20.900 usec  
 DE 6.50 usec  
 TE 297.9 K  
 D1 2.00000000 sec  
 D11 0.03000000 sec  
 TDO 1

===== CHANNEL f1 =====  
 SFO1 100.6233319 MHz  
 NUC1 13C  
 P1 10.00 usec  
 PLW1 47.50000000 W

===== CHANNEL f2 =====  
 SFO2 400.1316005 MHz  
 NUC2 1H  
 CPDPRG2 waltz16  
 PCPD2 90.00 usec  
 PLW2 15.00000000 W  
 PLW12 0.33750001 W  
 PLW13 0.27338001 W

F2 - Processing parameters  
 SI 32768  
 SF 100.6127685 MHz  
 WDW EM  
 SSB 0  
 LB 2.00 Hz  
 GB 0  
 PC 1.00

4-(benzo[d][1,3]dioxol-5-yl)-2-phenyl- $\alpha$ -carboline

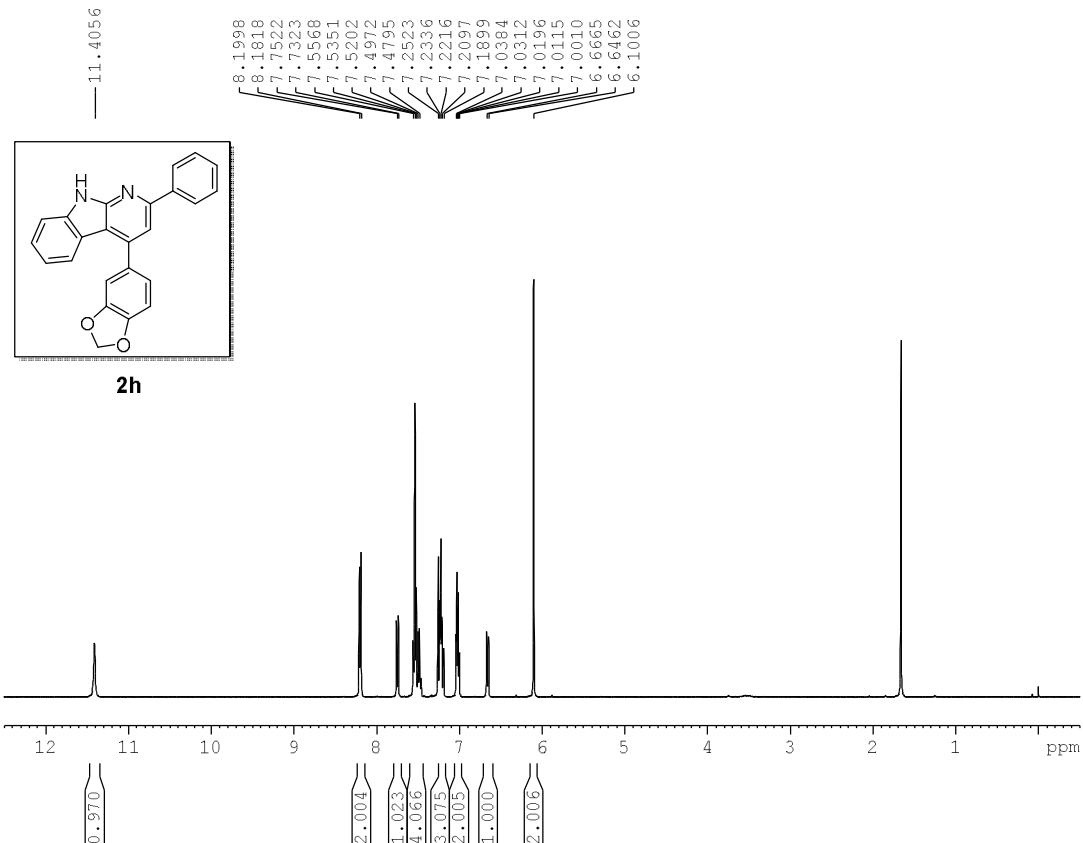

Current Data Parameters  
 NAME H(piperonyl chalcone)  
 EXPNO 61  
 PROCNO 1

F2 - Acquisition Parameters  
 Date\_ 20161021  
 Time 16.43  
 INSTRUM spect  
 PROBHD 5 mm BBO BB-1H  
 PULPROG zg30  
 TD 32768  
 SOLVENT CDCl3  
 NS 16  
 DS 0  
 SWH 7246.377 Hz  
 FIDRES 0.221142 Hz  
 AQ 2.2609921 sec  
 RG 114  
 DW 69.000 usec  
 DE 6.50 usec  
 TE 297.3 K  
 D1 2.0000000 sec  
 TDO 1

===== CHANNEL f1 =====  
 NUC1 1H  
 P1 14.40 usec  
 PL1 1.80 dB  
 SFO1 400.1324008 MHz

F2 - Processing parameters  
 SI 16584  
 SF 400.1300128 MHz  
 WDW EM  
 SSB 0  
 LB 0 Hz  
 GB 0  
 PC 1.00

4-(benzo[d][1,3]dioxol-5-yl)-2-phenyl- $\alpha$ -carboline

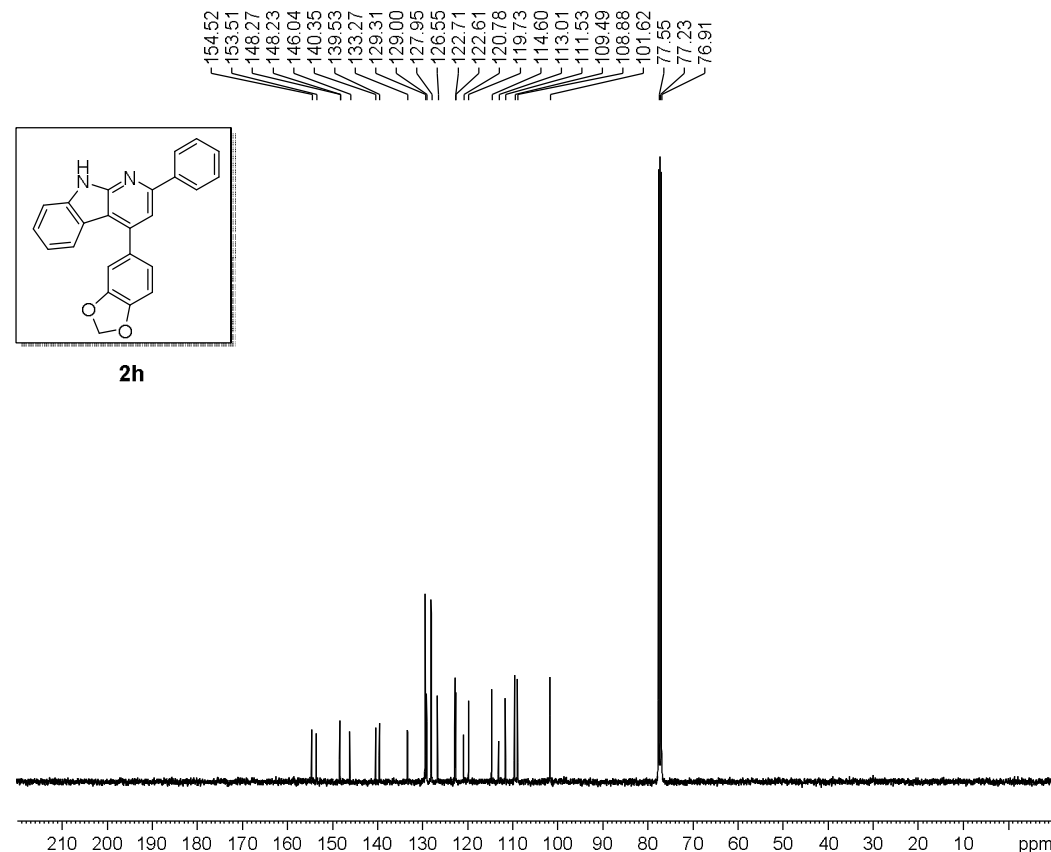

Current Data Parameters  
 NAME H(piperonyl chalcone)  
 EXPNO 613  
 PROCNO 1

F2 - Acquisition Parameters  
 Date\_ 20141126  
 Time 18.25  
 INSTRUM spect  
 PROBHD 5 mm PABBO BB/  
 PULPROG zgpg30  
 TD 32768  
 SOLVENT CDCl3  
 NS 725  
 DS 0  
 SWH 24038.461 Hz  
 FIDRES 0.733596 Hz  
 AQ 0.6815744 sec  
 RG 198.09  
 DW 20.900 usec  
 DE 6.50 usec  
 TE 297.9 K  
 D1 2.0000000 sec  
 D11 0.03000000 sec  
 TDO 1

===== CHANNEL f1 =====  
 SFO1 100.6233319 MHz  
 NUC1 13C  
 P1 10.00 usec  
 PLW1 46.0000000 W

===== CHANNEL f2 =====  
 SFO2 400.1316005 MHz  
 NUC2 1H  
 CPDPRG2 waltz16  
 PCPD2 90.00 usec  
 PLW2 15.0000000 W  
 PLW12 0.34252000 W  
 PLW13 0.27744001 W

F2 - Processing parameters  
 SI 32768  
 SF 100.6127473 MHz  
 WDW EM  
 SSB 0  
 LB 2.00 Hz  
 GB 0  
 PC 1.00

2-phenyl-4-(thiophen-2-yl)- $\alpha$ -carboline

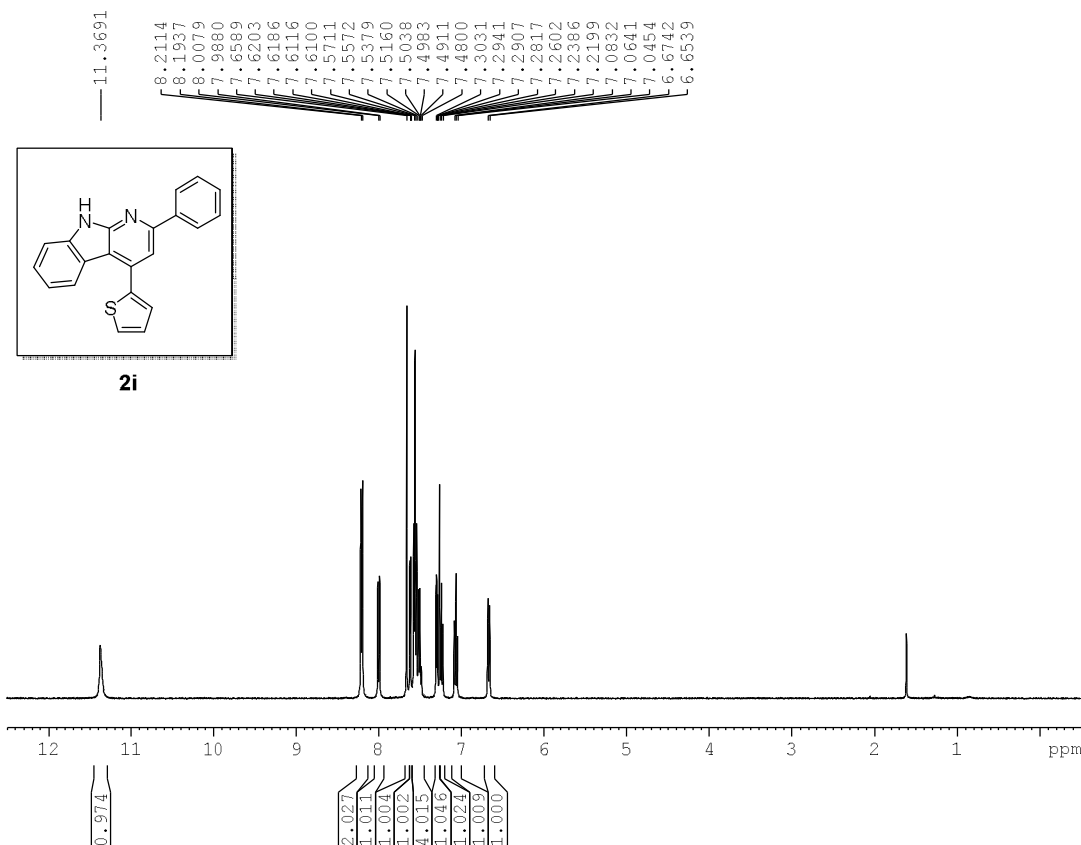

Current Data Parameters  
 NAME l(2-thiophene chalcone)  
 EXPNO 61  
 PROCNO 1

F2 - Acquisition Parameters  
 Date\_ 20150108  
 Time 21.33  
 INSTRUM spect  
 PROBHD 5 mm PABBO BB/  
 PULPROG zg30  
 TD 32768  
 SOLVENT CDCl3  
 NS 8  
 DS 0  
 SWH 7211.539 Hz  
 FIDRES 0.220079 Hz  
 AQ 2.2719147 sec  
 RG 198.09  
 DW 69.333 usec  
 DE 10.52 usec  
 TE 298.8 K  
 D1 2.0000000 sec  
 TDO 1

==== CHANNEL f1 =====  
 SFO1 400.1324008 MHz  
 NUC1 1H  
 P1 12.80 usec  
 PLW1 15.00000000 W

F2 - Processing parameters  
 SI 16584  
 SF 400.1300089 MHz  
 WDW EM  
 SSB 0  
 LB 0 Hz  
 GB 0  
 PC 1.00

2-phenyl-4-(thiophen-2-yl)- $\alpha$ -carboline

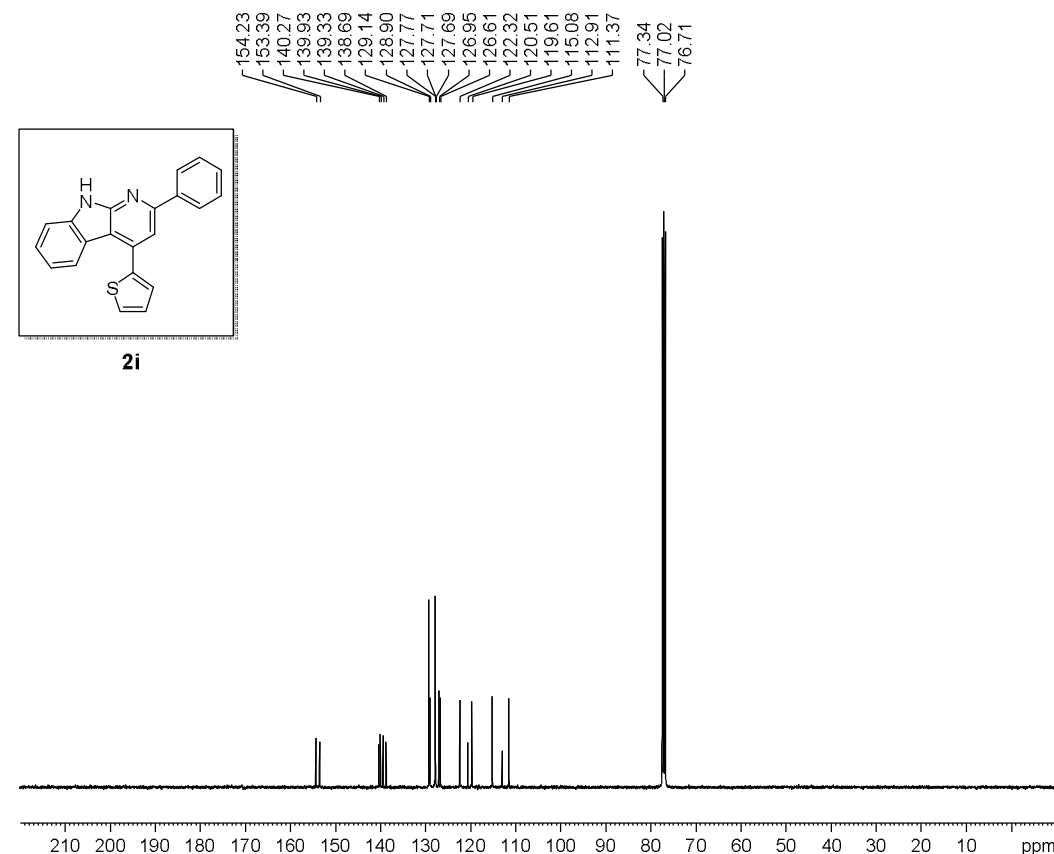

Current Data Parameters  
 NAME l(2-thiophene chalcone)  
 EXPNO 613  
 PROCNO 1

F2 - Acquisition Parameters  
 Date\_ 20150108  
 Time 23.53  
 INSTRUM spect  
 PROBHD 5 mm PABBO BB/  
 PULPROG zgpg30  
 TD 32768  
 SOLVENT CDCl3  
 NS 2000  
 DS 0  
 SWH 24038.461 Hz  
 FIDRES 0.733596 Hz  
 AQ 0.6815744 sec  
 RG 198.09  
 DW 20.900 usec  
 DE 6.50 usec  
 TE 297.8 K  
 D1 2.0000000 sec  
 D11 0.03000000 sec  
 TDO 1

==== CHANNEL f1 =====  
 SFO1 100.6233319 MHz  
 NUC1 13C  
 P1 10.00 usec  
 PLW1 46.00000000 W

==== CHANNEL f2 =====  
 SFO2 400.1316005 MHz  
 NUC2 1H  
 CPDPRG2 waltz16  
 PCPD2 90.00 usec  
 PLW2 15.00000000 W  
 PLW12 0.34252000 W  
 PLW13 0.27744001 W

F2 - Processing parameters  
 SI 32768  
 SF 100.6127685 MHz  
 WDW EM  
 SSB 0  
 LB 2.00 Hz  
 GB 0  
 PC 1.00

2-(4-chlorophenyl)-4-phenyl- $\alpha$ -carboline

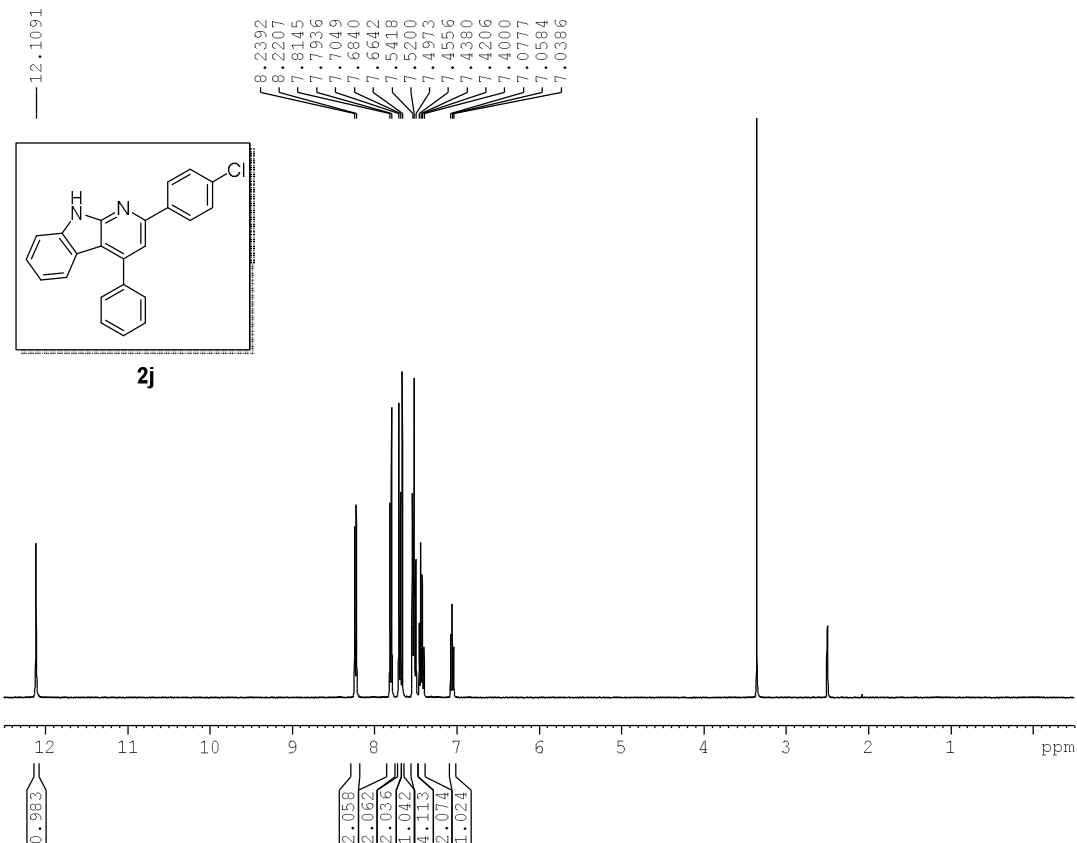

Current Data Parameters  
 NAME J(4-Cl chalcone)  
 EXPNO 61  
 PROCNO 1

F2 - Acquisition Parameters  
 Date\_ 20150403  
 Time 17.01  
 INSTRUM spect  
 PROBHD 5 mm PABBO BB/  
 PULPROG zg30  
 TD 32768  
 SOLVENT DMSO  
 NS 16  
 DS 0  
 SWH 7211.539 Hz  
 FIDRES 0.220079 Hz  
 AQ 2.2719147 sec  
 RG 4.01  
 DW 69.333 usec  
 DE 10.52 usec  
 TE 298.0 K  
 D1 2.0000000 sec  
 TDO 1

===== CHANNEL f1 =====  
 SFO1 400.1324008 MHz  
 NUC1 1H  
 P1 12.80 usec  
 PLW1 15.0000000 W

F2 - Processing parameters  
 SI 16584  
 SF 400.1300025 MHz  
 WDW EM  
 SSB 0  
 LB 0 Hz  
 GB 0  
 PC 1.00

2-(4-chlorophenyl)-4-phenyl- $\alpha$ -carboline

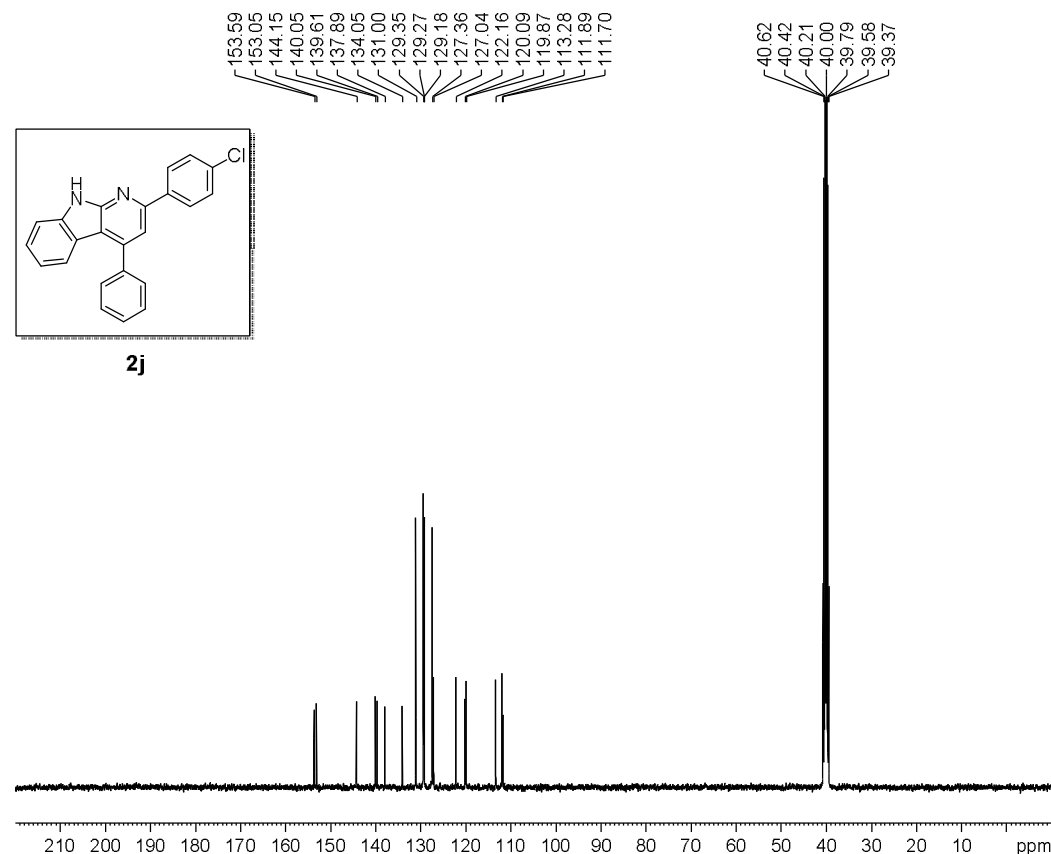

Current Data Parameters  
 NAME J(4-Cl chalcone)  
 EXPNO 613  
 PROCNO 1

F2 - Acquisition Parameters  
 Date\_ 20150317  
 Time 17.01  
 INSTRUM spect  
 PROBHD 5 mm PABBO BB/  
 PULPROG zgpg30  
 TD 32768  
 SOLVENT DMSO  
 NS 1200  
 DS 0  
 SWH 24038.461 Hz  
 FIDRES 0.733596 Hz  
 AQ 0.6815744 sec  
 RG 198.09  
 DW 20.900 usec  
 DE 6.50 usec  
 TE 297.9 K  
 D1 2.0000000 sec  
 D11 0.0300000 sec  
 TDO 1

===== CHANNEL f1 =====  
 SFO1 100.6233319 MHz  
 NUC1 13C  
 P1 10.00 usec  
 PLW1 46.0000000 W

===== CHANNEL f2 =====  
 SFO2 400.1316005 MHz  
 NUC2 1H  
 CPDPRG2 waltz16  
 PCPD2 90.00 usec  
 PLW2 15.0000000 W  
 PLW12 0.34252000 W  
 PLW13 0.27744001 W

F2 - Processing parameters  
 SI 32768  
 SF 100.6127708 MHz  
 WDW EM  
 SSB 0  
 LB 2.00 Hz  
 GB 0  
 PC 1.00

2-(4-bromophenyl)-4-phenyl- $\alpha$ -carboline

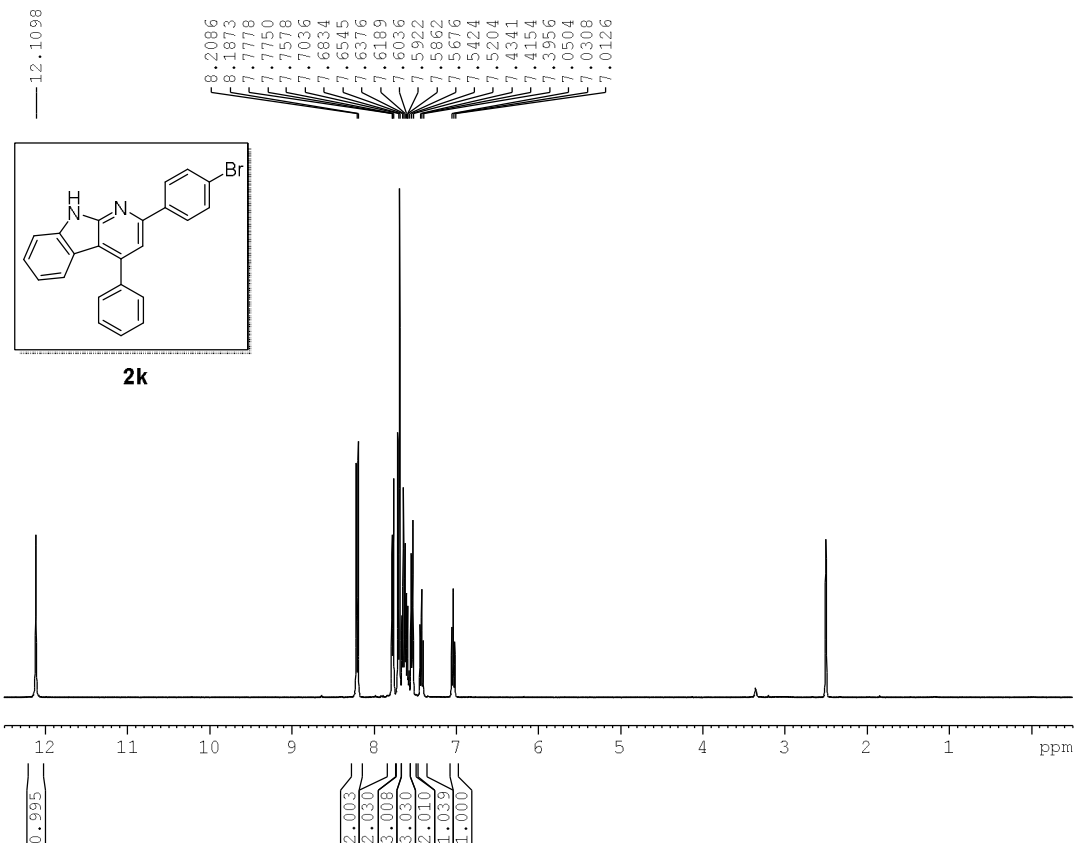

```

Current Data Parameters
NAME      K(4-Br chalcone)
EXPNO    61
PROCNO   1

F2 - Acquisition Parameters
Date_    20141222
Time     19.47
INSTRUM  spect
PROBHD   5 mm BBO BB-1H
PULPROG  zg30
TD        32768
SOLVENT  DMSO
NS        16
DS        0
SWH       7246.377 Hz
FIDRES    0.221142 Hz
AQ        2.2609921 sec
RG        114
DW        69.000 usec
DE        6.50 usec
TE        295.8 K
D1        2.0000000 sec
TD0       1

===== CHANNEL f1 =====
NUC1      1H
P1        15.00 usec
PL1       -5.85 dB
SFO1      400.1324008 MHz

F2 - Processing parameters
SI        16384
SF        400.1300026 MHz
WDW       EM
SSB       0
LB        0 Hz
GB        0
PC        1.00
    
```

2-(4-bromophenyl)-4-phenyl- $\alpha$ -carboline

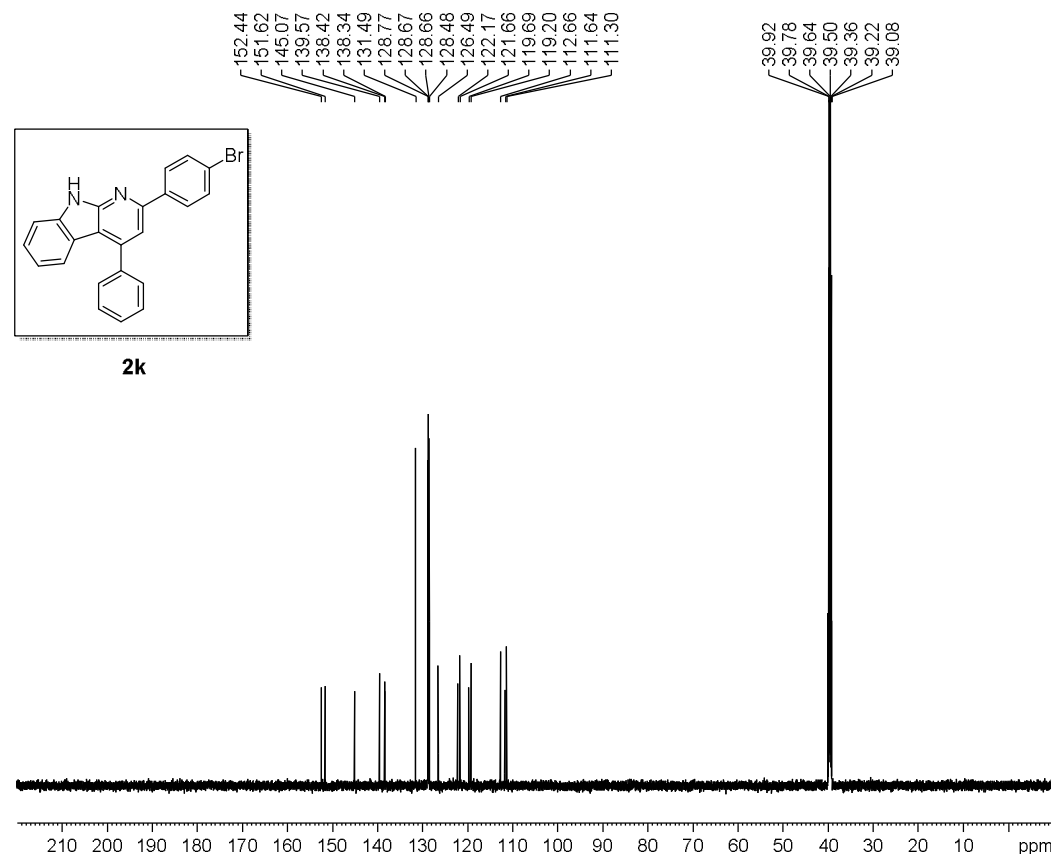

```

Current Data Parameters
NAME      K(4-Br chalcone)
EXPNO    613
PROCNO   1

F2 - Acquisition Parameters
Date_    20150116
Time     16.37
INSTRUM  spect
PROBHD   5 mm PATBO BB-
PULPROG  zgpg30
TD        65536
SOLVENT  DMSO
NS        146
DS        0
SWH       36057.691 Hz
FIDRES    0.550197 Hz
AQ        0.9087659 sec
RG        2050
DW        13.957 usec
DE        6.50 usec
TE        310.0 K
D1        2.0000000 sec
D11      0.03000000 sec
TD0       1

===== CHANNEL f1 =====
SFO1      150.9287115 MHz
NUC1      13C
P1        10.80 usec
PLW1      50.0000000 W

===== CHANNEL f2 =====
SFO2      600.1724007 MHz
NUC2      1H
CPDPRG2  waltz64
PCPD2    70.00 usec
PLW2     30.0000000 W
PLW12    1.03470004 W
PLW13    0.50700003 W

F2 - Processing parameters
SI        65536
SF        150.9129582 MHz
WDW       EM
SSB       0
LB        1.00 Hz
GB        0
PC        1.00
    
```



2-(4-nitrophenyl)-4-phenyl- $\alpha$ -carboline

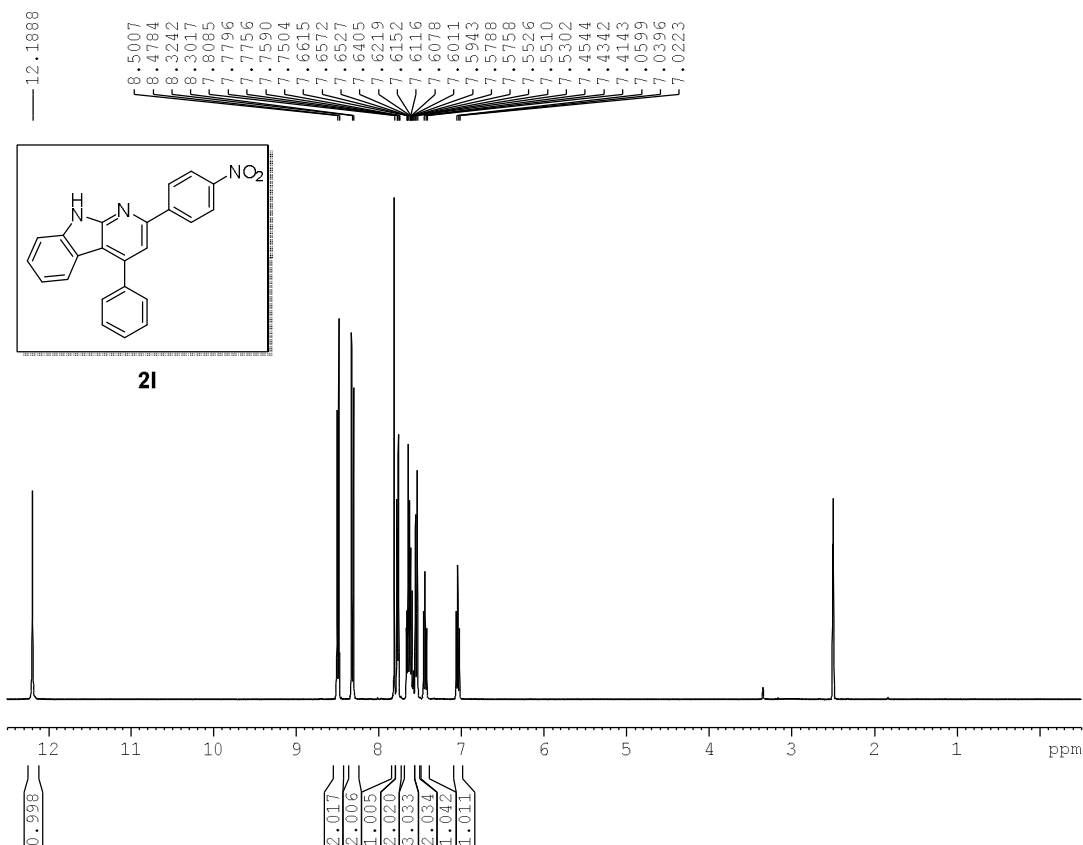

Current Data Parameters  
 NAME L(4-NO2 chalcone)  
 EXPNO 61  
 PROCNO 1

F2 - Acquisition Parameters  
 Date\_ 20141213  
 Time 13.25  
 INSTRUM spect  
 PROBHD 5 mm BBO BB-1H  
 PULPROG zg30  
 TD 32768  
 SOLVENT DMSO  
 NS 16  
 DS 0  
 SWH 7246.377 Hz  
 FIDRES 0.221142 Hz  
 AQ 2.2609921 sec  
 RG 114  
 DW 69.000 usec  
 DE 6.50 usec  
 TE 298.4 K  
 D1 2.0000000 sec  
 TDO 1

===== CHANNEL f1 =====  
 NUC1 1H  
 P1 15.00 usec  
 PL1 -5.85 dB  
 SFO1 400.1324008 MHz

F2 - Processing parameters  
 SI 18584  
 SF 400.1300028 MHz  
 WDW EM  
 SSB 0  
 LB 0 Hz  
 GB 0  
 PC 1.00

2-(4-nitrophenyl)-4-phenyl- $\alpha$ -carboline

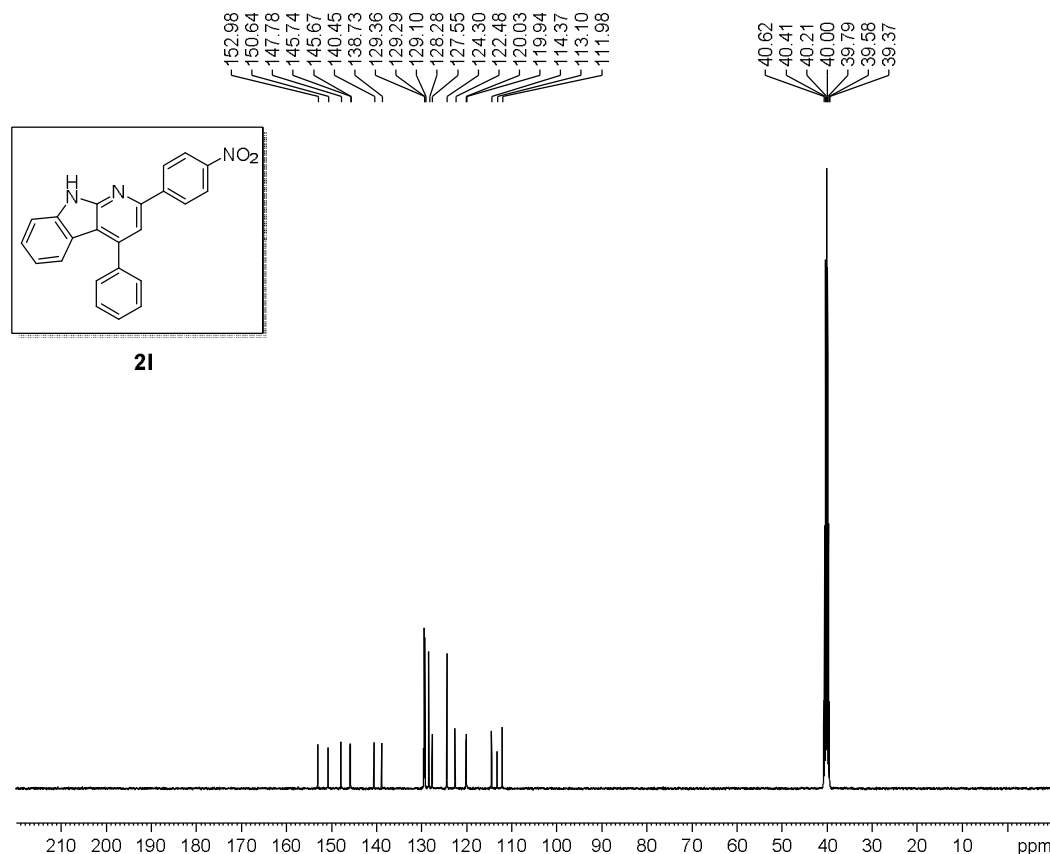

Current Data Parameters  
 NAME L(4-NO2 chalcone)  
 EXPNO 613  
 PROCNO 1

F2 - Acquisition Parameters  
 Date\_ 20141213  
 Time 19.18  
 INSTRUM spect  
 PROBHD 5 mm PABBO BB/  
 PULPROG zgpg30  
 TD 32768  
 SOLVENT DMSO  
 NS 2000  
 DS 0  
 SWH 24038.461 Hz  
 FIDRES 0.733596 Hz  
 AQ 0.6815744 sec  
 RG 198.09  
 DW 20.900 usec  
 DE 6.50 usec  
 TE 297.4 K  
 D1 2.0000000 sec  
 D11 0.03000000 sec  
 TDO 1

===== CHANNEL f1 =====  
 SFO1 100.6233319 MHz  
 NUC1 13C  
 P1 10.00 usec  
 PLW1 46.00000000 W

===== CHANNEL f2 =====  
 SFO2 400.1316005 MHz  
 NUC2 1H  
 CPDPRG2 waltz16  
 PCPD2 90.00 usec  
 PLW2 15.00000000 W  
 PLW12 0.34252000 W  
 PLW13 0.27744001 W

F2 - Processing parameters  
 SI 32768  
 SF 100.6127712 MHz  
 WDW EM  
 SSB 0  
 LB 2.00 Hz  
 GB 0  
 PC 1.00

2-(4-isopropylphenyl)-4-phenyl- $\alpha$ -carboline

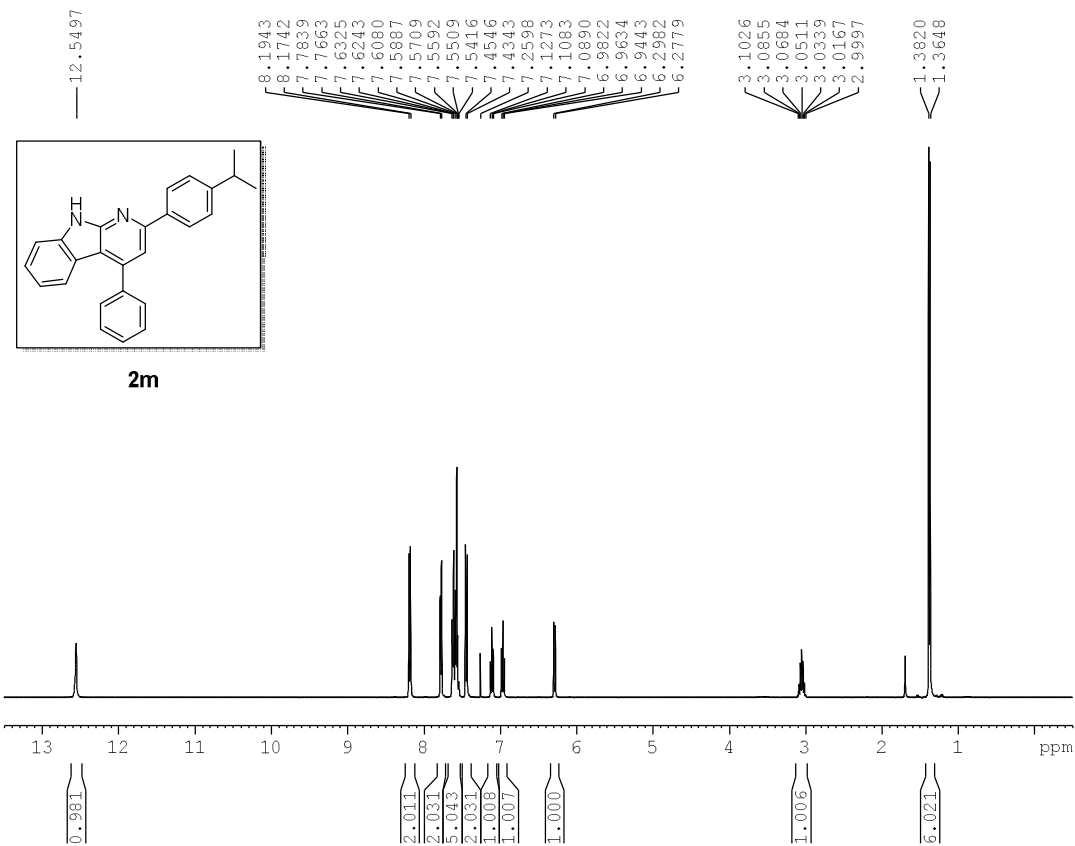

Current Data Parameters  
 NAME M(4-cumene chalcone)  
 EXPNO 61  
 PROCNO 1

F2 - Acquisition Parameters  
 Date\_ 20150209  
 Time 18:55  
 INSTRUM spect  
 PROBHD 5 mm BBO BB-1H  
 PULPROG zg30  
 TD 32768  
 SOLVENT CDCl3  
 NS 16  
 DS 0  
 SWH 7246.377 Hz  
 FIDRES 0.221142 Hz  
 AQ 2.2609921 sec  
 RG 114  
 DW 69.000 usec  
 DE 6.50 usec  
 TE 298.1 K  
 D1 2.00000000 sec  
 TDO

===== CHANNEL f1 =====  
 NUC1 1H  
 P1 15.00 usec  
 PL1 -5.85 dB  
 SFO1 400.1324008 MHz

F2 - Processing parameters  
 SI 16384  
 SF 400.1300095 MHz  
 WDW EM  
 SSB 0  
 LB 0 Hz  
 GB 0  
 PC 1.00

2-(4-isopropylphenyl)-4-phenyl- $\alpha$ -carboline

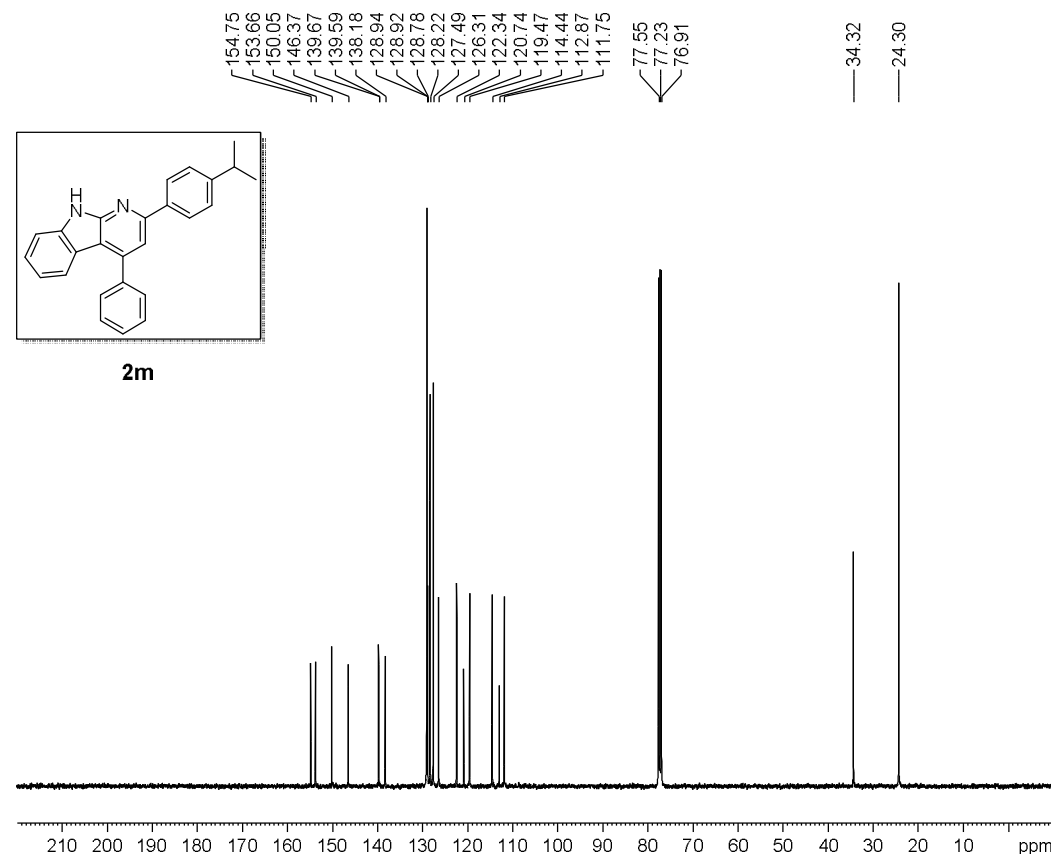

Current Data Parameters  
 NAME M(4-cumene chalcone)  
 EXPNO 613  
 PROCNO 1

F2 - Acquisition Parameters  
 Date\_ 20150227  
 Time 23:06  
 INSTRUM spect  
 PROBHD 5 mm PABBO BB/  
 PULPROG zgpg30  
 TD 32768  
 SOLVENT CDCl3  
 NS 1200  
 DS 0  
 SWH 24038.461 Hz  
 FIDRES 0.733596 Hz  
 AQ 0.6815744 sec  
 RG 198.09  
 DW 20.900 usec  
 DE 6.50 usec  
 TE 298.0 K  
 D1 2.00000000 sec  
 D11 0.03000000 sec  
 TDO 1

===== CHANNEL f1 =====  
 SFO1 100.6233319 MHz  
 NUC1 13C  
 P1 10.00 usec  
 PLW1 46.00000000 W

===== CHANNEL f2 =====  
 SFO2 400.1316005 MHz  
 NUC2 1H  
 CPDPRG2 waltz16  
 PCPD2 90.00 usec  
 PLW2 15.00000000 W  
 PLW12 0.34252000 W  
 PLW13 0.27744001 W

F2 - Processing parameters  
 SI 32768  
 SF 100.6127508 MHz  
 WDW EM  
 SSB 0  
 LB 2.00 Hz  
 GB 0  
 PC 1.00

2-(4-isobutylphenyl)-4-phenyl- $\alpha$ -carboline

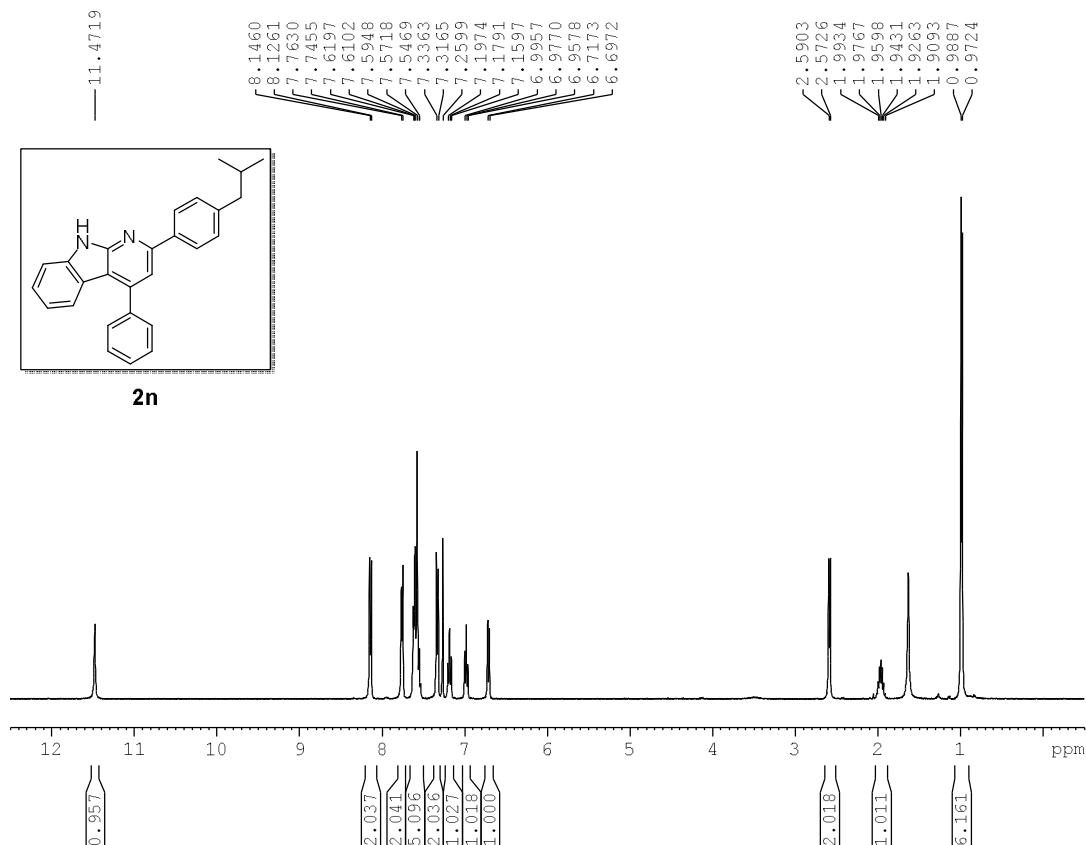

Current Data Parameters  
 NAME N(4-isobutyl chalcone)  
 EXPNO 61  
 PROCNO 1

F2 - Acquisition Parameters  
 Date\_ 20140228  
 Time 1.42  
 INSTRUM spect  
 PROBHD 5 mm BBO BB-1H  
 PULPROG zg30  
 TD 32768  
 SOLVENT CDCl3  
 NS 16  
 DS 0  
 SWH 7246.377 Hz  
 FIDRES 0.221142 Hz  
 AQ 2.2609921 sec  
 RG 223.1  
 DW 69.000 usec  
 DE 6.50 usec  
 TE 296.1 K  
 D1 2.0000000 sec  
 TDO

===== CHANNEL f1 =====  
 NUC1 <sup>1</sup>H  
 P1 14.35 usec  
 PL1 -2.00 dB  
 SFO1 400.1324008 MHz

F2 - Processing parameters  
 SI 16384  
 SF 400.1300091 MHz  
 WDW EM  
 SSB 0  
 LB 0 Hz  
 GB 0  
 PC 1.00

2-(4-isobutylphenyl)-4-phenyl- $\alpha$ -carboline

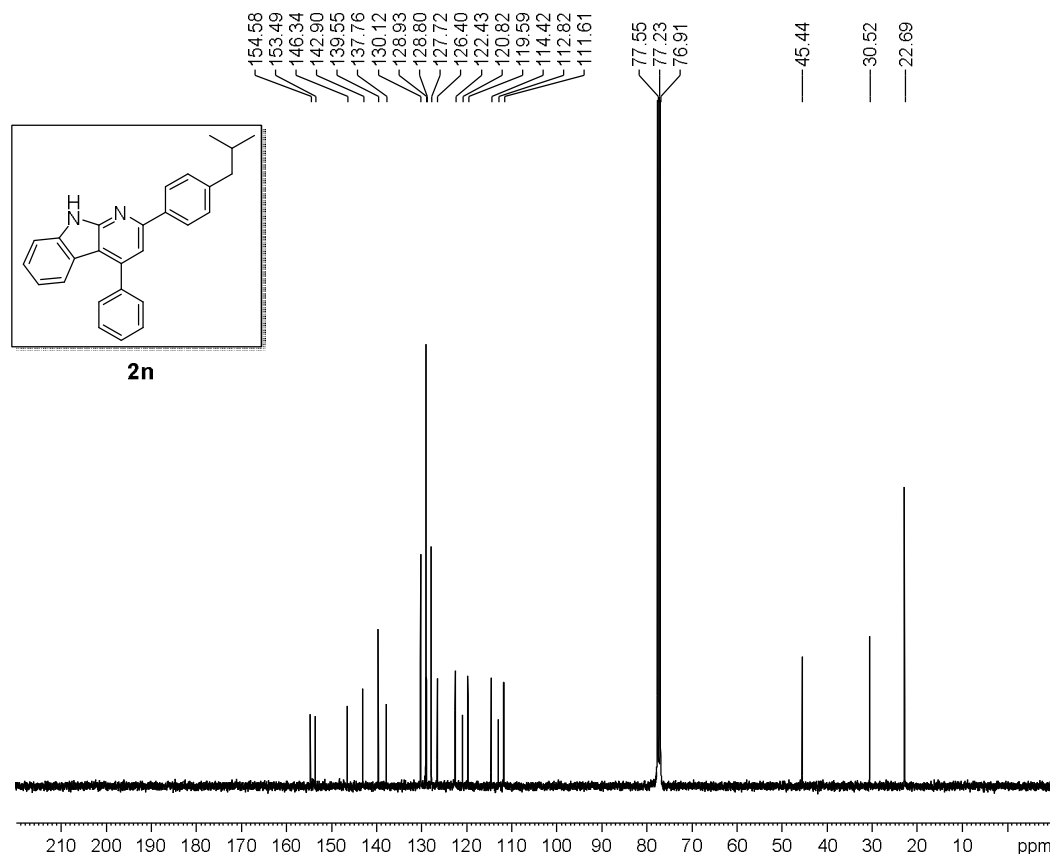

Current Data Parameters  
 NAME N(4-isobutyl chalcone)  
 EXPNO 613  
 PROCNO 1

F2 - Acquisition Parameters  
 Date\_ 20140226  
 Time 2.19  
 INSTRUM spect  
 PROBHD 5 mm BBO BB-1H  
 PULPROG zgpg30  
 TD 32768  
 SOLVENT CDCl3  
 NS 1749  
 DS 0  
 SWH 24038.461 Hz  
 FIDRES 0.733596 Hz  
 AQ 0.6815744 sec  
 RG 8192  
 DW 20.800 usec  
 DE 6.50 usec  
 TE 296.1 K  
 D1 2.0000000 sec  
 D11 0.0300000 sec  
 TDO 1

===== CHANNEL f1 =====  
 NUC1 <sup>13</sup>C  
 P1 9.40 usec  
 PL1 7.00 dB  
 SFO1 100.6233325 MHz

===== CHANNEL f2 =====  
 CPDPRG2 waltz16  
 NUC2 <sup>1</sup>H  
 PCPD2 90.00 usec  
 PL2 -2.00 dB  
 PL12 13.95 dB  
 PL13 17.00 dB  
 SFO2 400.1316005 MHz

F2 - Processing parameters  
 SI 32768  
 SF 100.6127490 MHz  
 WDW EM  
 SSB 0  
 LB 1.00 Hz  
 GB 0  
 PC 1.00

2-(4-(tert-butyl)phenyl)-4-phenyl- $\alpha$ -carboline

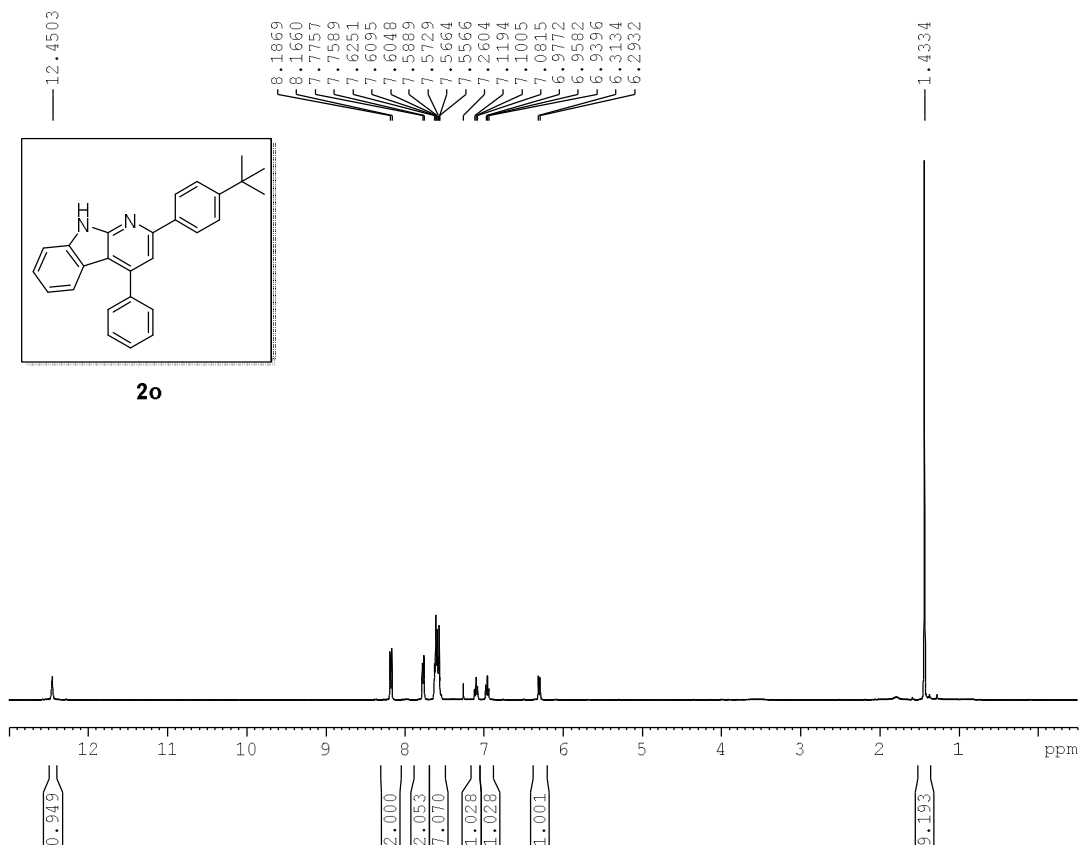

Current Data Parameters  
 NAME O(4-t-butyl chalcone)  
 EXPNO 61  
 PROCNO 1

F2 - Acquisition Parameters  
 Date\_ 20150410  
 Time 17.30  
 INSTRUM spect  
 PROBHD 5 mm BBO BB-1H  
 PULPROG zg30  
 TD 32768  
 SOLVENT CDCl3  
 NS 16  
 DS 0  
 SWH 7246.377 Hz  
 FIDRES 0.221142 Hz  
 AQ 2.2609921 sec  
 RG 161.3  
 DW 69.000 usec  
 DE 6.50 usec  
 TE 293.9 K  
 D1 2.0000000 sec  
 TDO

===== CHANNEL f1 =====  
 NUC1 1H  
 P1 21.45 usec  
 PL1 -5.85 dB  
 SFO1 400.1324008 MHz

F2 - Processing parameters  
 SI 16584  
 SF 400.1300093 MHz  
 WDW EM  
 SSB 0  
 LB 0 Hz  
 GB 0  
 PC 1.00

2-(4-(tert-butyl)phenyl)-4-phenyl- $\alpha$ -carboline

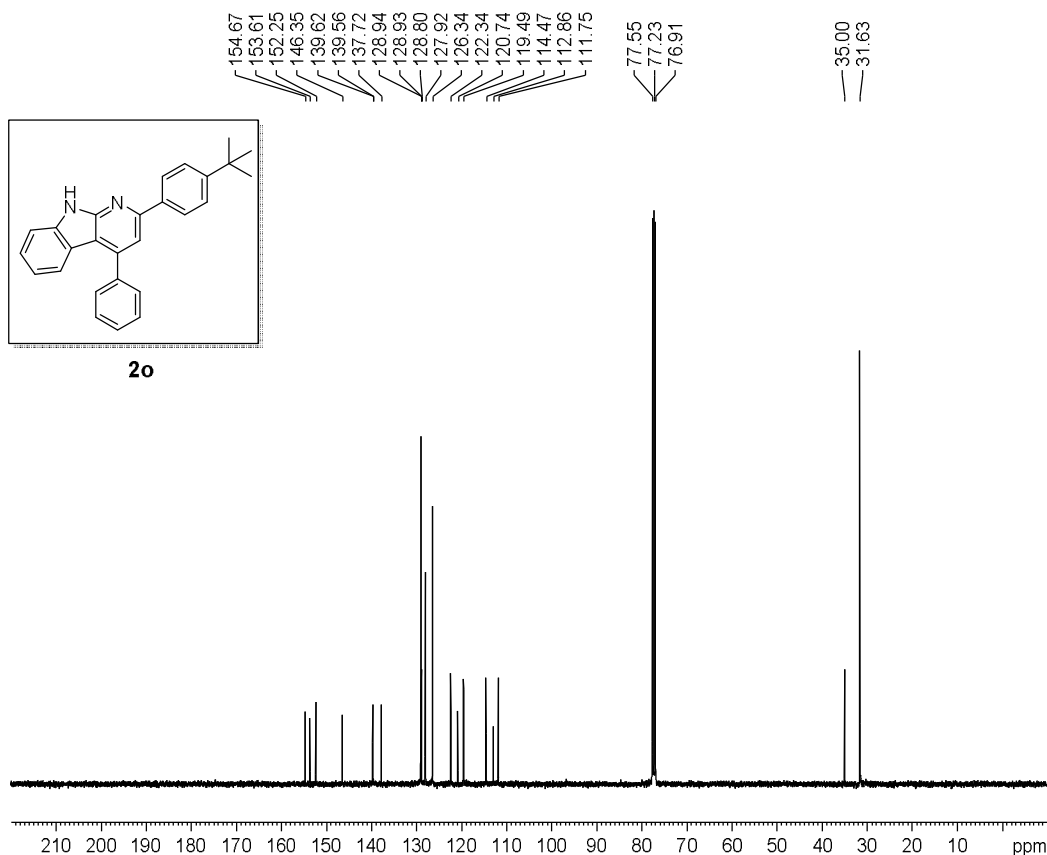

Current Data Parameters  
 NAME O(4-t-butyl chalcone)  
 EXPNO 613  
 PROCNO 1

F2 - Acquisition Parameters  
 Date\_ 20150410  
 Time 18.06  
 INSTRUM spect  
 PROBHD 5 mm BBO BB-1H  
 PULPROG zgpg30  
 TD 32768  
 SOLVENT CDCl3  
 NS 1200  
 DS 0  
 SWH 24038.461 Hz  
 FIDRES 0.733596 Hz  
 AQ 0.6815744 sec  
 RG 8192  
 DW 20.800 usec  
 DE 6.50 usec  
 TE 294.0 K  
 D1 2.0000000 sec  
 D11 0.03000000 sec  
 TDO 1

===== CHANNEL f1 =====  
 NUC1 13C  
 P1 10.00 usec  
 PL1 6.70 dB  
 SFO1 100.6233325 MHz

===== CHANNEL f2 =====  
 CPDPRG2 waltz16  
 NUC2 1H  
 PCPD2 90.00 usec  
 PL2 -5.85 dB  
 PL12 6.00 dB  
 PL13 9.00 dB  
 SFO2 400.1316005 MHz

F2 - Processing parameters  
 SI 32768  
 SF 100.6127469 MHz  
 WDW EM  
 SSB 0  
 LB 1.00 Hz  
 GB 0  
 PC 1.00

4-phenyl-2-(p-tolyl)- $\alpha$ -carboline

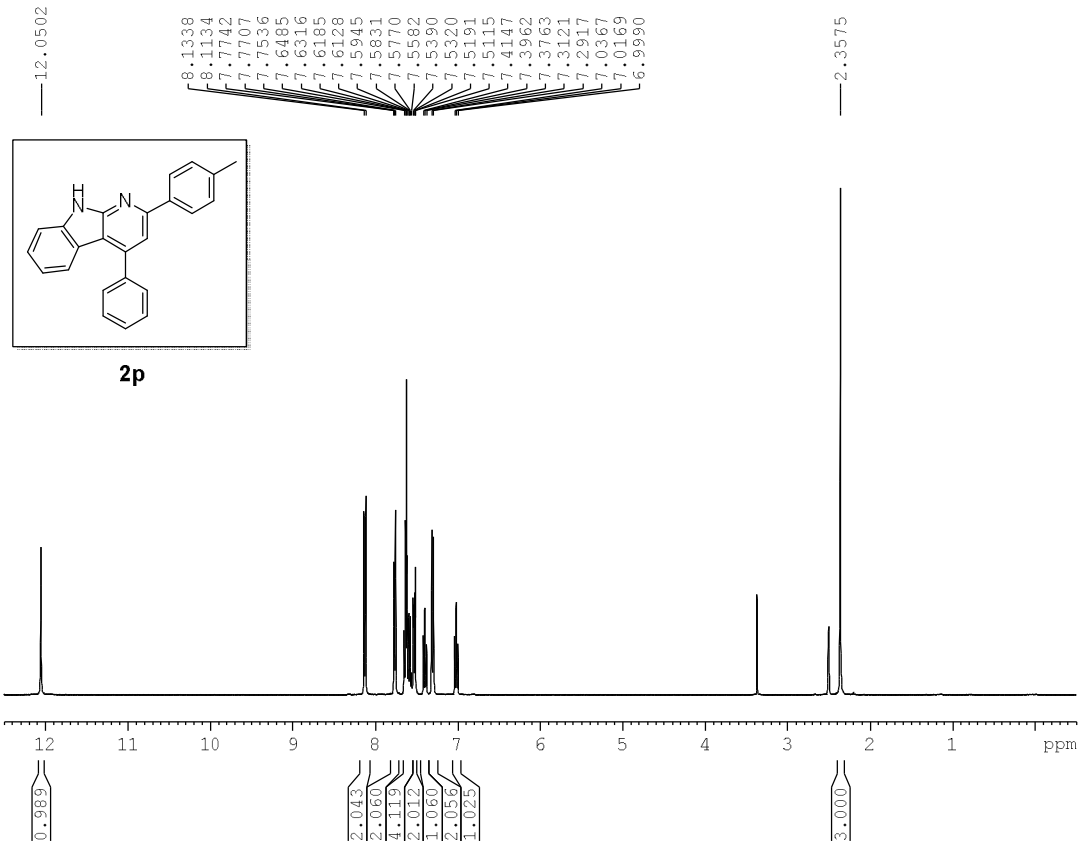

Current Data Parameters  
 NAME P(4-Me chalcone)  
 EXPNO 61  
 PROCNO 1

F2 - Acquisition Parameters  
 Date\_ 20150105  
 Time\_ 19.37  
 INSTRUM spect  
 PROBHD 5 mm PABBO BB/  
 PULPROG zg30  
 TD 32768  
 SOLVENT DMSO  
 NS 16  
 DS 0  
 SWH 7211.539 Hz  
 FIDRES 0.220079 Hz  
 AQ 2.2719147 sec  
 RG 63.58  
 DW 69.333 usec  
 DE 10.62 usec  
 TE 297.7 K  
 D1 2.0000000 sec  
 TDO 1

==== CHANNEL f1 =====  
 SFO1 400.1324008 MHz  
 NUC1 1H  
 P1 12.80 usec  
 PLW1 15.0000000 W

F2 - Processing parameters  
 SI 16584  
 SF 400.1300024 MHz  
 WDW EM  
 SSB 0  
 LB 0 Hz  
 GB 0  
 PC 1.00

4-phenyl-2-(p-tolyl)- $\alpha$ -carboline

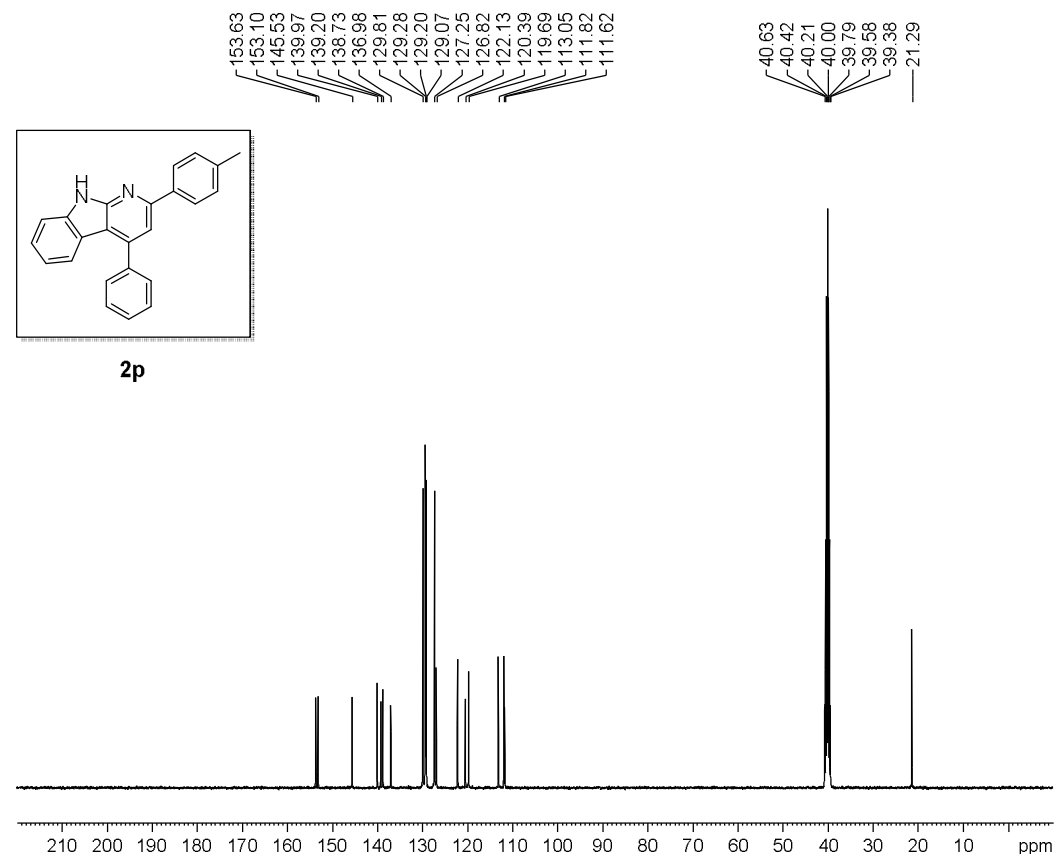

Current Data Parameters  
 NAME P(4-Me chalcone)  
 EXPNO 613  
 PROCNO 1

F2 - Acquisition Parameters  
 Date\_ 20150108  
 Time\_ 22.10  
 INSTRUM spect  
 PROBHD 5 mm PABBO BB/  
 PULPROG zgpg30  
 TD 32768  
 SOLVENT DMSO  
 NS 2000  
 DS 0  
 SWH 24038.461 Hz  
 FIDRES 0.733596 Hz  
 AQ 0.6815744 sec  
 RG 198.09  
 DW 20.900 usec  
 DE 6.50 usec  
 TE 297.6 K  
 D1 2.0000000 sec  
 D11 0.0300000 sec  
 TDO 1

==== CHANNEL f1 =====  
 SFO1 100.6233319 MHz  
 NUC1 13C  
 P1 10.00 usec  
 PLW1 46.0000000 W

==== CHANNEL f2 =====  
 SFO2 400.1316005 MHz  
 NUC2 1H  
 CPDPRG2 waltz16  
 PCPD2 90.00 usec  
 PLW2 15.0000000 W  
 PLW12 0.34252000 W  
 PLW13 0.27744001 W

F2 - Processing parameters  
 SI 32768  
 SF 100.6127683 MHz  
 WDW EM  
 SSB 0  
 LB 2.00 Hz  
 GB 0  
 PC 1.00

2-(naphthalen-2-yl)-4-phenyl- $\alpha$ -carboline

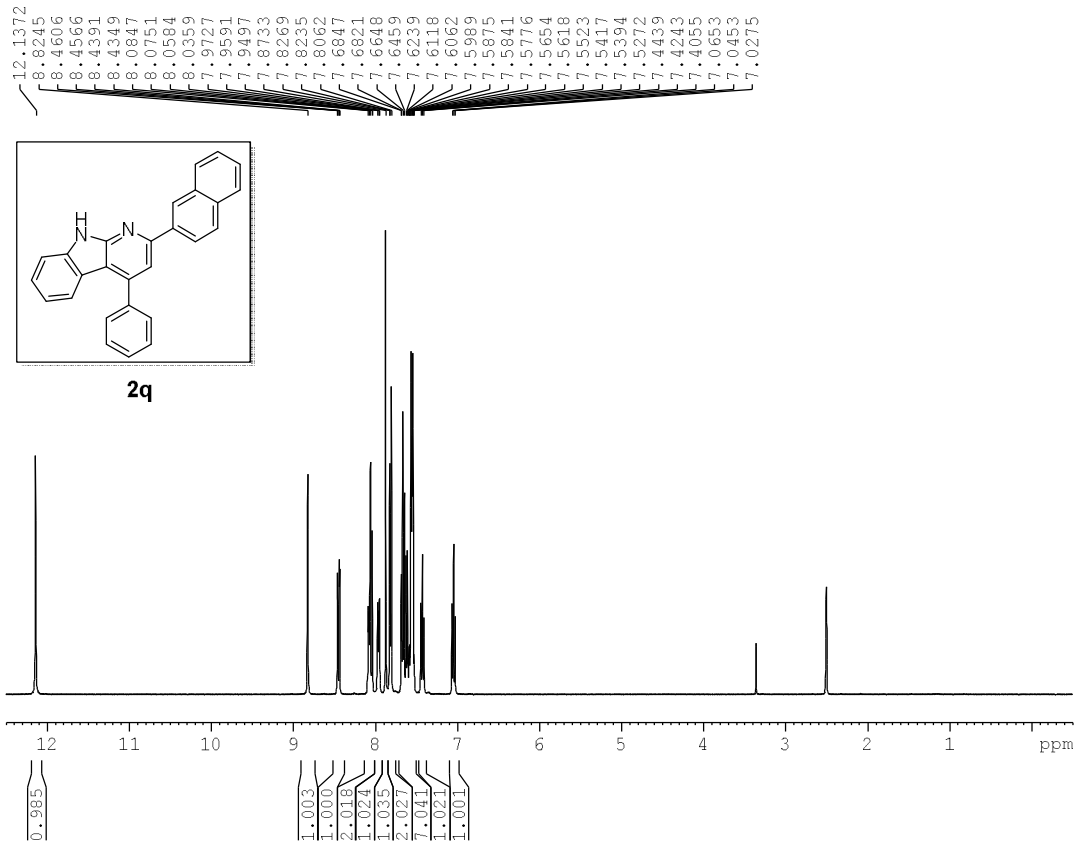

Current Data Parameters  
 NAME Q(2-naphthyl chalcone)  
 EXPNO 61  
 PROCNO 1

F2 - Acquisition Parameters  
 Date\_ 20150305  
 Time 18.13  
 INSTRUM spect  
 PROBHD 5 mm PABBO BB/  
 PULPROG zg30  
 TD 32768  
 SOLVENT DMSO  
 NS 16  
 DS 0  
 SWH 7211.539 Hz  
 FIDRES 0.220079 Hz  
 AQ 2.2719147 sec  
 RG 89.08  
 DW 69.333 usec  
 DE 10.52 usec  
 TE 297.3 K  
 D1 2.0000000 sec  
 TDO 1

==== CHANNEL f1 =====  
 SFO1 400.1324009 MHz  
 NUC1 1H  
 P1 12.80 usec  
 PLW1 15.0000000 W

F2 - Processing parameters  
 SI 16584  
 SF 400.1300024 MHz  
 WDW EM  
 SSB 0  
 LB 0 Hz  
 GB 0  
 PC 1.00

2-(naphthalen-2-yl)-4-phenyl- $\alpha$ -carboline

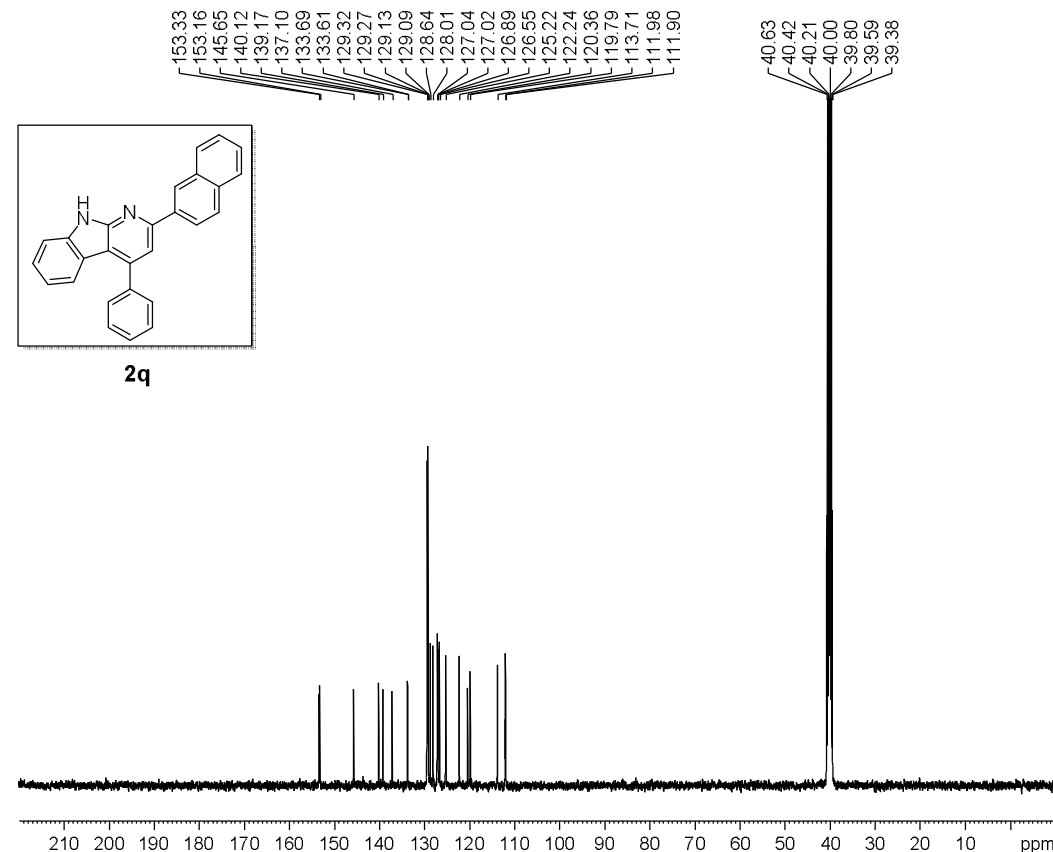

Current Data Parameters  
 NAME Q(2-naphthyl chalcone)  
 EXPNO 613  
 PROCNO 1

F2 - Acquisition Parameters  
 Date\_ 20150304  
 Time 17.10  
 INSTRUM spect  
 PROBHD 5 mm PABBO BB/  
 PULPROG zgpg30  
 TD 32768  
 SOLVENT DMSO  
 NS 1000  
 DS 0  
 SWH 24038.461 Hz  
 FIDRES 0.733596 Hz  
 AQ 0.6815744 sec  
 RG 198.09  
 DW 20.900 usec  
 DE 6.50 usec  
 TE 297.4 K  
 D1 2.0000000 sec  
 D11 0.0300000 sec  
 TDO 1

==== CHANNEL f1 =====  
 SFO1 100.6233319 MHz  
 NUC1 13C  
 P1 10.00 usec  
 PLW1 46.0000000 W

==== CHANNEL f2 =====  
 SFO2 400.1316005 MHz  
 NUC2 1H  
 CPDPRG2 waltz16  
 PCPD2 90.00 usec  
 PLW2 15.0000000 W  
 PLW12 0.34252000 W  
 PLW13 0.27744001 W

F2 - Processing parameters  
 SI 32768  
 SF 100.6127685 MHz  
 WDW EM  
 SSB 0  
 LB 2.00 Hz  
 GB 0  
 PC 1.00

2-(4-methoxyphenyl)-4-phenyl- $\alpha$ -carboline

Current Data Parameters  
 NAME R(4'-OMe chalcone)  
 EXPNO 61  
 PROCNO 1

F2 - Acquisition Parameters  
 Date\_ 20150112  
 Time 17.09  
 INSTRUM spect  
 PROBHD 5 mm PABBO BB/  
 PULPROG zg30  
 TD 32768  
 SOLVENT CDCl3  
 NS 16  
 DS 0  
 SWH 7211.539 Hz  
 FIDRES 0.220079 Hz  
 AQ 2.2719147 sec  
 RG 39.72  
 DW 69.333 usec  
 DE 10.52 usec  
 TE 297.5 K  
 D1 2.0000000 sec  
 TDO 1

==== CHANNEL f1 =====  
 SFO1 400.1324009 MHz  
 NUC1 1H  
 P1 12.80 usec  
 PLW1 15.0000000 W  
 F2 - Processing parameters  
 SI 16584  
 SF 400.1300092 MHz  
 WDW EM  
 SSB 0  
 LB 0 Hz  
 GB 0  
 PC 1.00

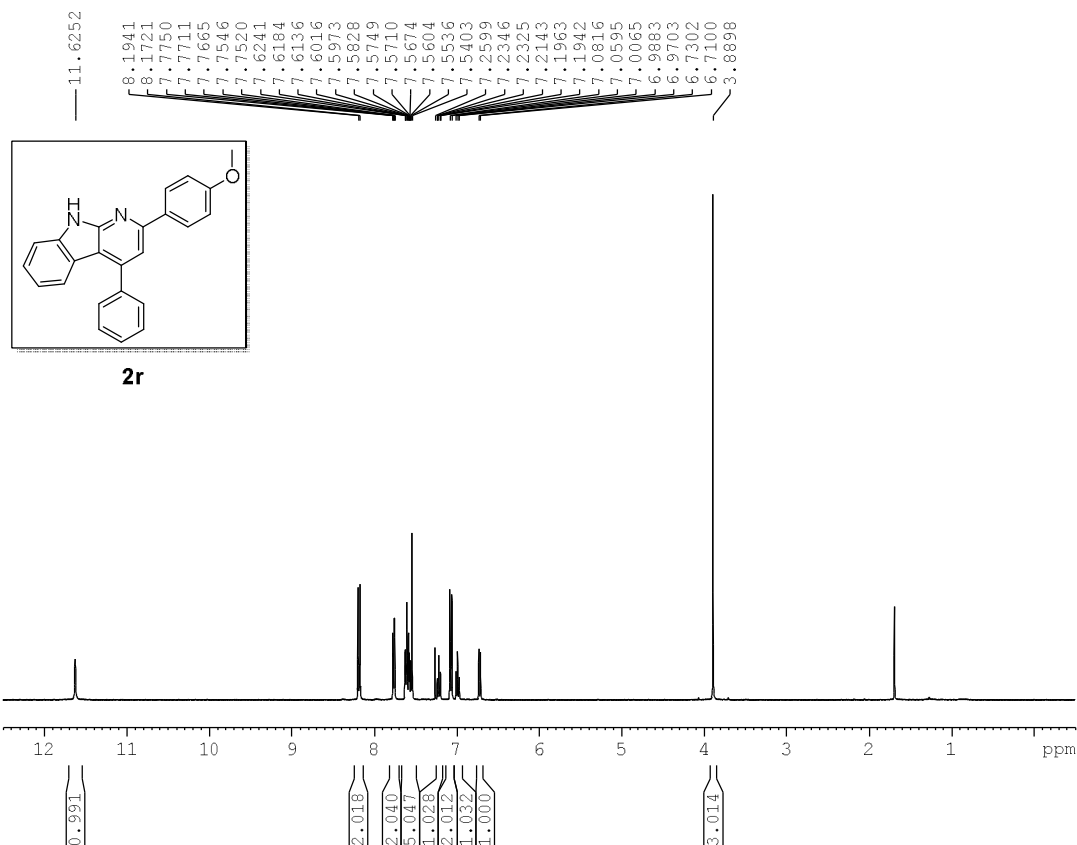

2-(4-methoxyphenyl)-4-phenyl- $\alpha$ -carboline

Current Data Parameters  
 NAME R(4'-OMe chalcone)  
 EXPNO 613  
 PROCNO 1

F2 - Acquisition Parameters  
 Date\_ 20150116  
 Time 16.52  
 INSTRUM spect  
 PROBHD 5 mm PATBO BB-  
 PULPROG zgpg30  
 TD 65536  
 SOLVENT CDCl3  
 NS 160  
 DS 0  
 SWH 36057.691 Hz  
 FIDRES 0.550197 Hz  
 AQ 0.9087659 sec  
 RG 2050  
 DW 13.957 usec  
 DE 6.50 usec  
 TE 310.0 K  
 D1 2.0000000 sec  
 D11 0.0300000 sec  
 TDO 1

==== CHANNEL f1 =====  
 SFO1 150.9287115 MHz  
 NUC1 13C  
 P1 10.80 usec  
 PLW1 50.0000000 W  
 ===== CHANNEL f2 =====  
 SFO2 600.1724007 MHz  
 NUC2 1H  
 CPDPRG2 waltz64  
 PCPD2 70.00 usec  
 PLW2 30.0000000 W  
 PLW12 1.03470004 W  
 PLW13 0.50700003 W

F2 - Processing parameters  
 SI 65536  
 SF 150.9128313 MHz  
 WDW EM  
 SSB 0  
 LB 1.00 Hz  
 GB 0  
 PC 1.00

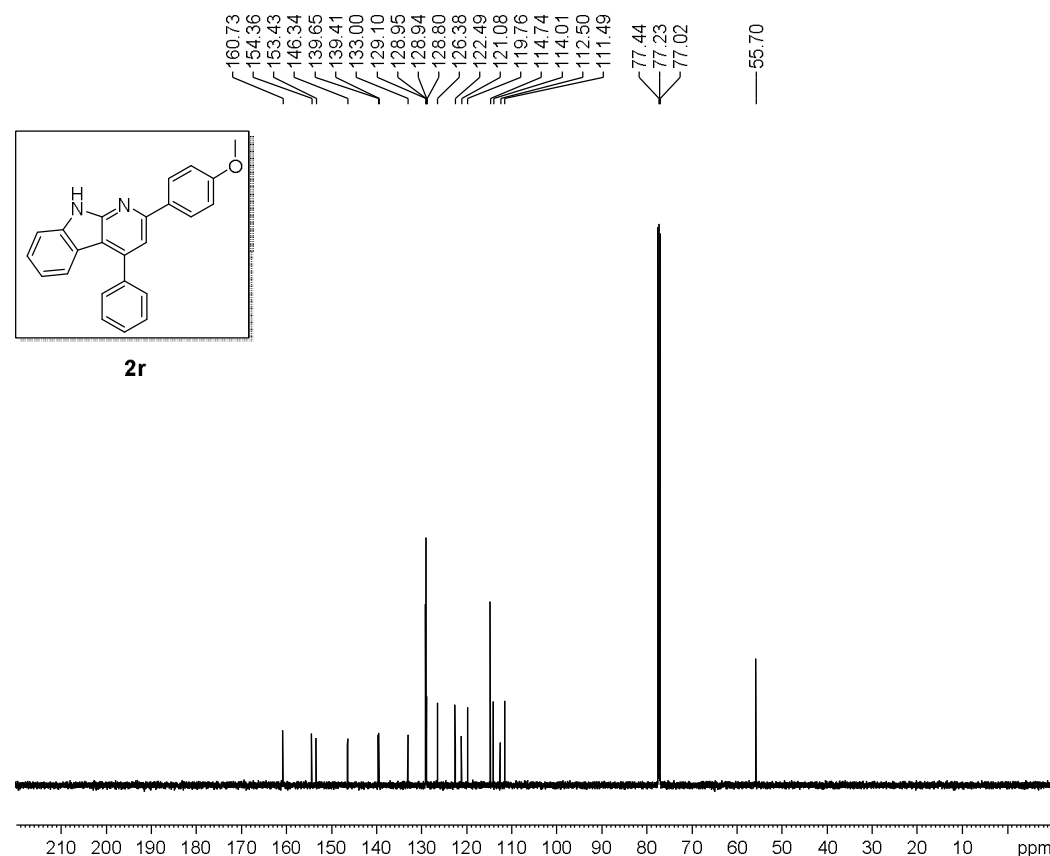

6-bromo-2,4-diphenyl- $\alpha$ -carboline

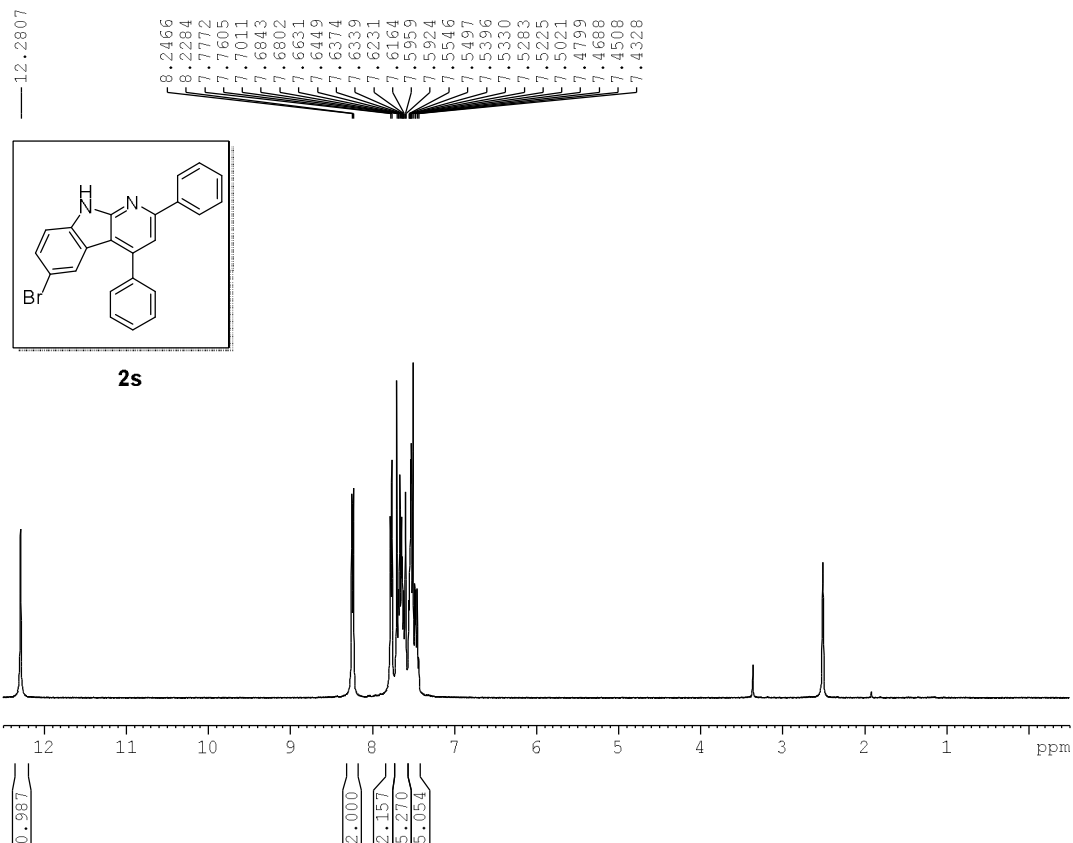

Current Data Parameters  
 NAME S(5-Br indole)  
 EXPNO 61  
 PROCNO 1

F2 - Acquisition Parameters  
 Date\_ 20150128  
 Time 14.43  
 INSTRUM spect  
 PROBHD 5 mm PABBO BB/  
 PULPROG zg30  
 TD 32768  
 SOLVENT DMSO  
 NS 16  
 DS 0  
 SWH 7211.539 Hz  
 FIDRES 0.220079 Hz  
 AQ 2.2719147 sec  
 RG 89.08  
 DW 69.333 usec  
 DE 10.52 usec  
 TE 297.6 K  
 D1 2.0000000 sec  
 TDO 1

==== CHANNEL f1 =====  
 SFO1 400.1324009 MHz  
 NUC1 1H  
 P1 12.80 usec  
 PLW1 15.0000000 W

F2 - Processing parameters  
 SI 16584  
 SF 400.1300000 MHz  
 WDW EM  
 SSB 0  
 LB 0 Hz  
 GB 0  
 PC 1.00

6-bromo-2,4-diphenyl- $\alpha$ -carboline

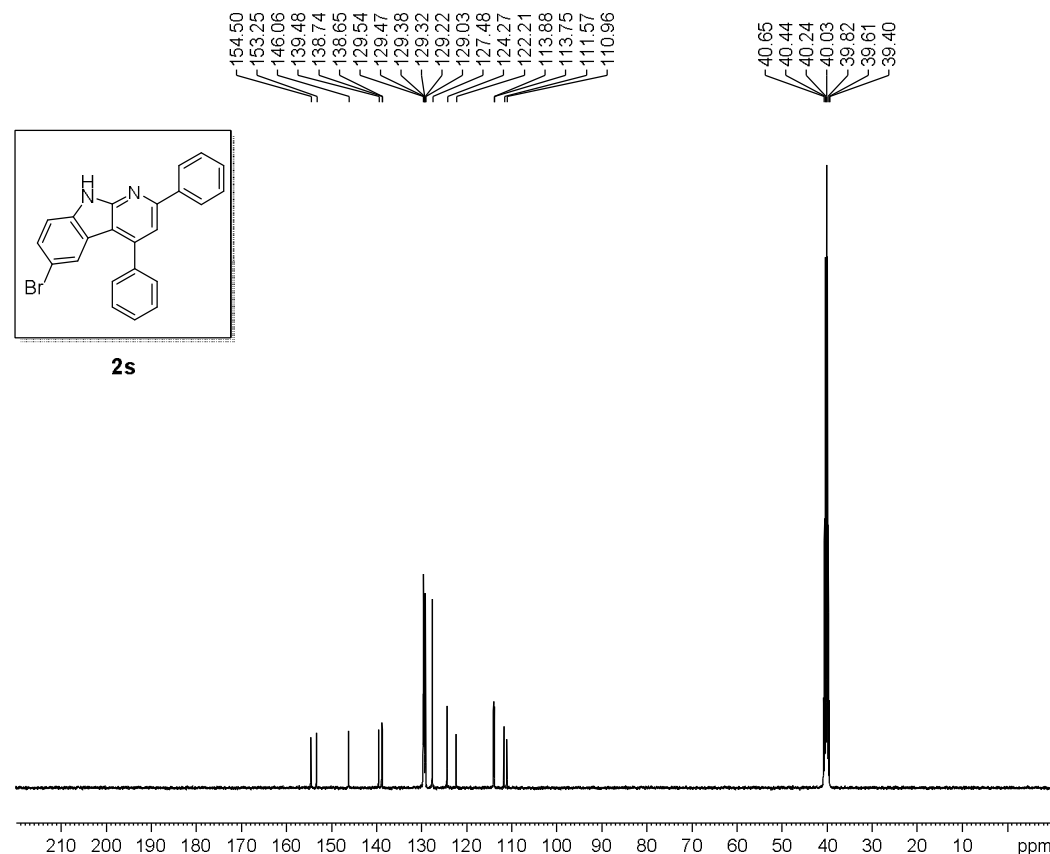

Current Data Parameters  
 NAME S(5-Br indole)  
 EXPNO 613  
 PROCNO 1

F2 - Acquisition Parameters  
 Date\_ 20150128  
 Time 17.03  
 INSTRUM spect  
 PROBHD 5 mm PABBO BB/  
 PULPROG zgpg30  
 TD 32768  
 SOLVENT DMSO  
 NS 1255  
 DS 0  
 SWH 24038.461 Hz  
 FIDRES 0.733596 Hz  
 AQ 0.6815744 sec  
 RG 198.09  
 DW 20.900 usec  
 DE 6.50 usec  
 TE 297.4 K  
 D1 2.0000000 sec  
 D11 0.0300000 sec  
 TDO 1

==== CHANNEL f1 =====  
 SFO1 100.6233319 MHz  
 NUC1 13C  
 P1 10.00 usec  
 PLW1 46.0000000 W

==== CHANNEL f2 =====  
 SFO2 400.1316005 MHz  
 NUC2 1H  
 CPDPRG2 waltz16  
 PCPD2 90.00 usec  
 PLW2 15.0000000 W  
 PLW12 0.34252000 W  
 PLW13 0.27744001 W

F2 - Processing parameters  
 SI 32768  
 SF 100.6127685 MHz  
 WDW EM  
 SSB 0  
 LB 2.00 Hz  
 GB 0  
 PC 1.00



6-nitro-2,4-diphenyl- $\alpha$ -carboline

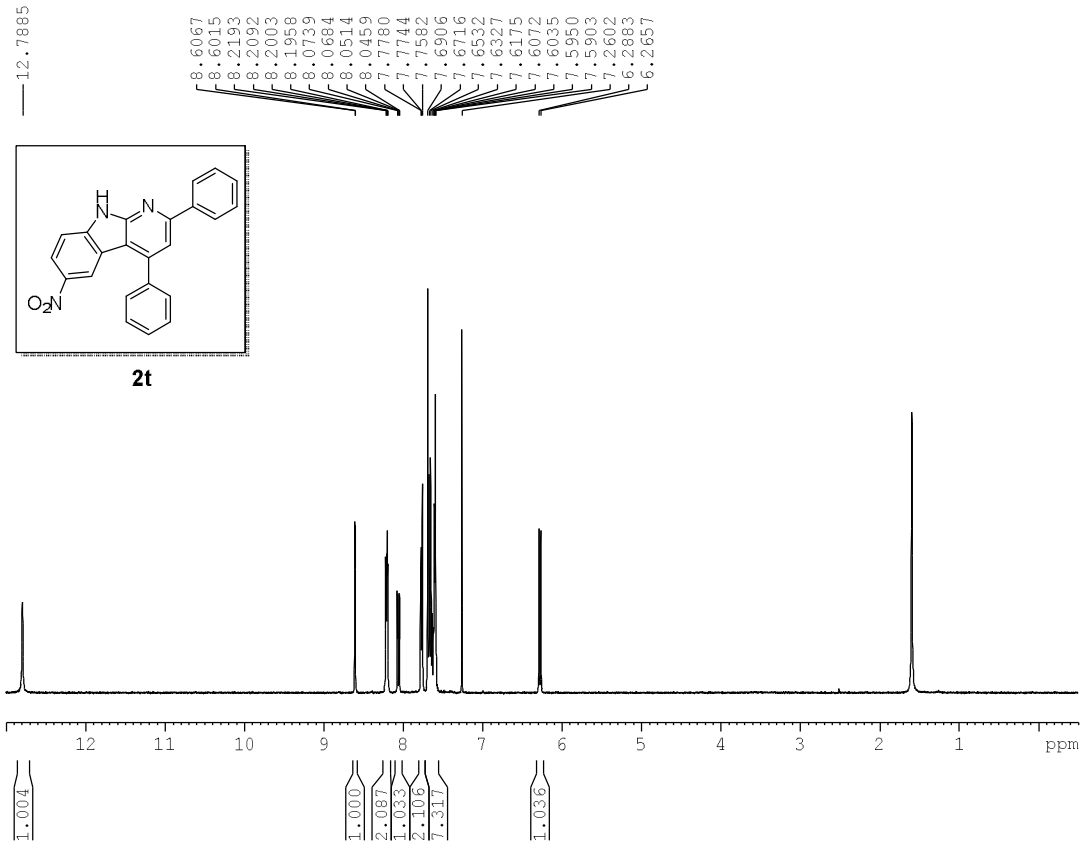

Current Data Parameters  
 NAME T(5-NO2 indole)  
 EXPNO 61  
 PROCNO 1

F2 - Acquisition Parameters  
 Date\_ 20161105  
 Time 15.55  
 INSTRUM spect  
 PROBHD 5 mm PABBO BB/  
 PULPROG zg30  
 TD 32768  
 SOLVENT CDCl3  
 NS 16  
 DS 0  
 SWH 7211.539 Hz  
 FIDRES 0.220079 Hz  
 AQ 2.2719147 sec  
 RG 4.01  
 DW 69.333 usec  
 DE 10.50 usec  
 TE 297.9 K  
 D1 2.0000000 sec  
 TDO 1

===== CHANNEL f1 =====  
 SFO1 400.1324009 MHz  
 NUC1 1H  
 P1 12.90 usec  
 PLW1 15.0000000 W

F2 - Processing parameters  
 SI 16584  
 SF 400.1300098 MHz  
 WDW EM  
 SSB 0  
 LB 0 Hz  
 GB 0  
 PC 1.00

6-nitro-2,4-diphenyl- $\alpha$ -carboline

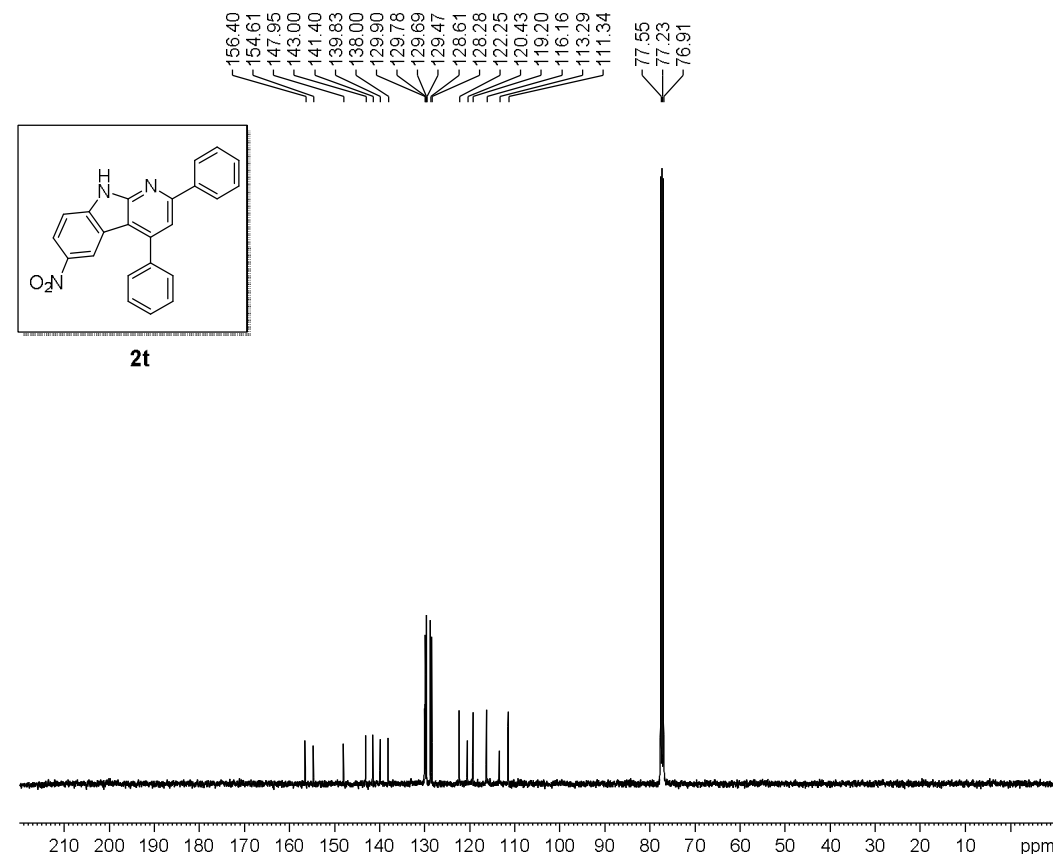

Current Data Parameters  
 NAME T(5-NO2 indole)  
 EXPNO 613  
 PROCNO 1

F2 - Acquisition Parameters  
 Date\_ 20161024  
 Time 22.53  
 INSTRUM spect  
 PROBHD 5 mm PABBO BB/  
 PULPROG zgpg30  
 TD 32768  
 SOLVENT CDCl3  
 NS 1500  
 DS 0  
 SWH 24038.461 Hz  
 FIDRES 0.733596 Hz  
 AQ 0.6815744 sec  
 RG 198.09  
 DW 20.900 usec  
 DE 6.50 usec  
 TE 298.7 K  
 D1 2.0000000 sec  
 D11 0.0300000 sec  
 TDO 1

===== CHANNEL f1 =====  
 SFO1 100.6228298 MHz  
 NUC1 13C  
 P1 10.00 usec  
 PLW1 47.5000000 W

===== CHANNEL f2 =====  
 SFO2 400.1316005 MHz  
 NUC2 1H  
 CPDPRG2 waltz16  
 PCPD2 90.00 usec  
 PLW2 15.0000000 W  
 PLW12 0.33750001 W  
 PLW13 0.27338001 W

F2 - Processing parameters  
 SI 32768  
 SF 100.6127472 MHz  
 WDW EM  
 SSB 0  
 LB 2.00 Hz  
 GB 0  
 PC 1.00

6-methoxy-2,4-diphenyl- $\alpha$ -carboline

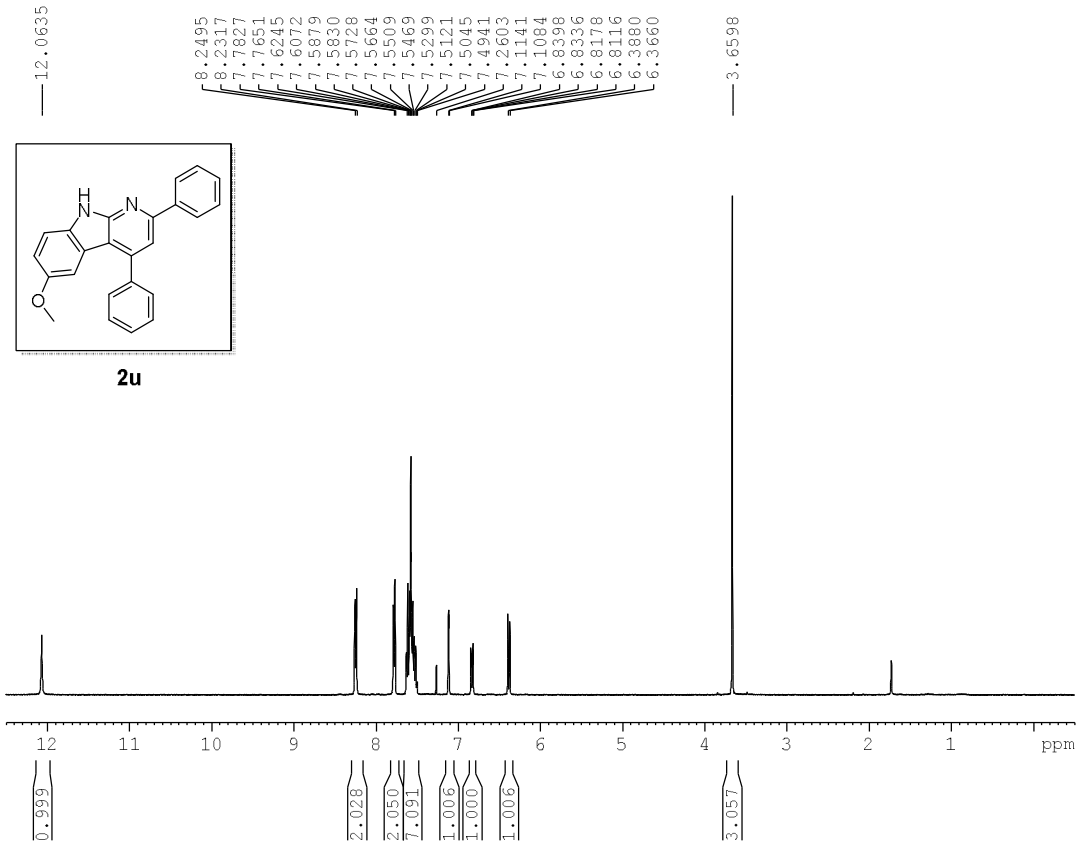

Current Data Parameters  
 NAME U(5-OMe indole)  
 EXPNO 61  
 PROCNO 1

F2 - Acquisition Parameters  
 Date\_ 20141222  
 Time 17:01  
 INSTRUM spect  
 PROBHD 5 mm BBO BB-1H  
 PULPROG zg30  
 TD 32768  
 SOLVENT CDCl3  
 NS 16  
 DS 0  
 SWH 7246.377 Hz  
 FIDRES 0.221142 Hz  
 AQ 2.2609921 sec  
 RG 114  
 DW 69.000 usec  
 DE 6.50 usec  
 TE 295.6 K  
 D1 2.00000000 sec  
 TDO 1

==== CHANNEL f1 =====  
 NUC1 1H  
 P1 15.00 usec  
 PL1 -5.85 dB  
 SFO1 400.1324008 MHz

F2 - Processing parameters  
 SI 16384  
 SF 400.1300091 MHz  
 WDW EM  
 SSB 0  
 LB 0 Hz  
 GB 0  
 PC 1.00

6-methoxy-2,4-diphenyl- $\alpha$ -carboline

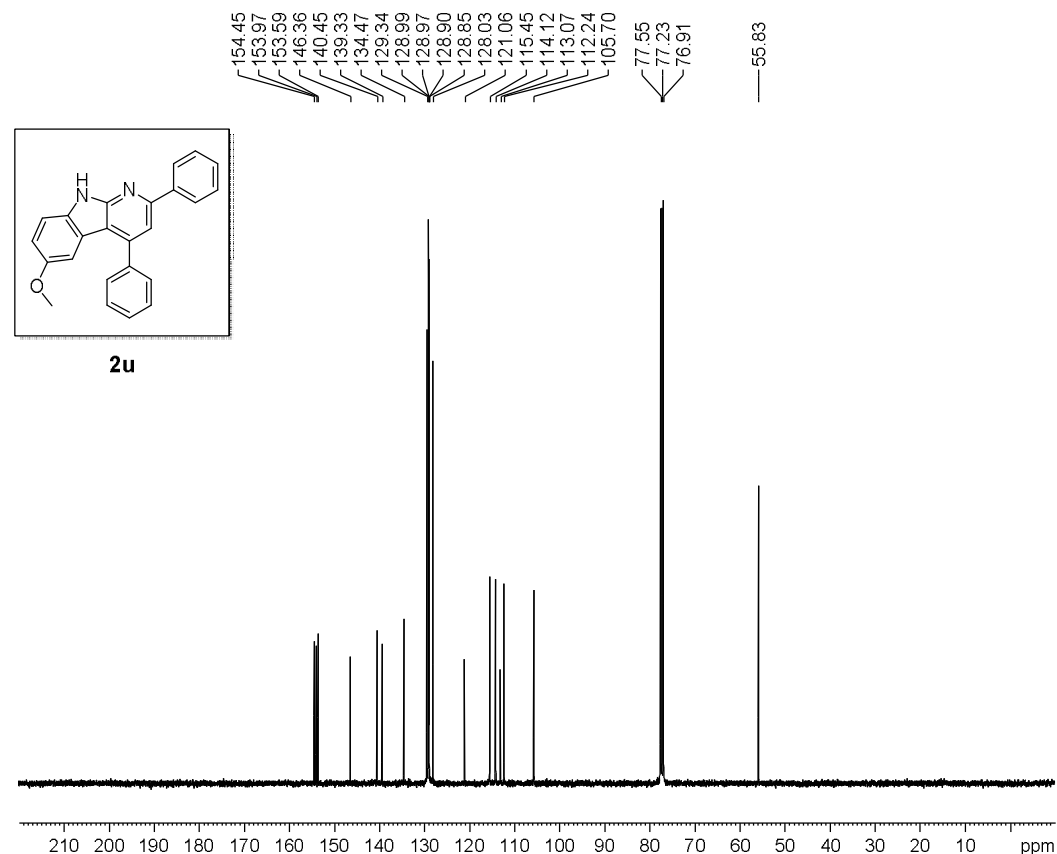

Current Data Parameters  
 NAME U(5-OMe indole)  
 EXPNO 613  
 PROCNO 1

F2 - Acquisition Parameters  
 Date\_ 20141220  
 Time 17:13  
 INSTRUM spect  
 PROBHD 5 mm BBO BB-1H  
 PULPROG zgpg30  
 TD 32768  
 SOLVENT CDCl3  
 NS 1623  
 DS 0  
 SWH 24038.461 Hz  
 FIDRES 0.733596 Hz  
 AQ 0.6815744 sec  
 RG 4096  
 DW 20.800 usec  
 DE 6.50 usec  
 TE 295.5 K  
 D1 2.00000000 sec  
 D11 0.03000000 sec  
 TDO 1

==== CHANNEL f1 =====  
 NUC1 13C  
 P1 10.00 usec  
 PL1 6.70 dB  
 SFO1 100.6233325 MHz

==== CHANNEL f2 =====  
 CPDPRG2 waltz16  
 NUC2 1H  
 PCPD2 90.00 usec  
 PL2 -5.85 dB  
 PL12 9.10 dB  
 PL13 12.10 dB  
 SFO2 400.1316005 MHz

F2 - Processing parameters  
 SI 32768  
 SF 100.6127505 MHz  
 WDW EM  
 SSB 0  
 LB 1.00 Hz  
 GB 0  
 PC 1.00

2,4-diphenyl-5-carboline

8.5077  
8.4882  
8.3281  
8.1898  
8.1714  
7.8191  
7.7879  
7.7845  
7.7664  
7.6343  
7.6159  
7.5965  
7.5449  
7.5418  
7.5385  
7.5328  
7.5250  
7.5201  
7.5042  
7.5002  
7.4688  
7.4487  
7.4290  
7.4105  
7.3923  
7.3646  
7.3460  
7.3279  
7.2598

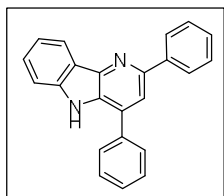

3a

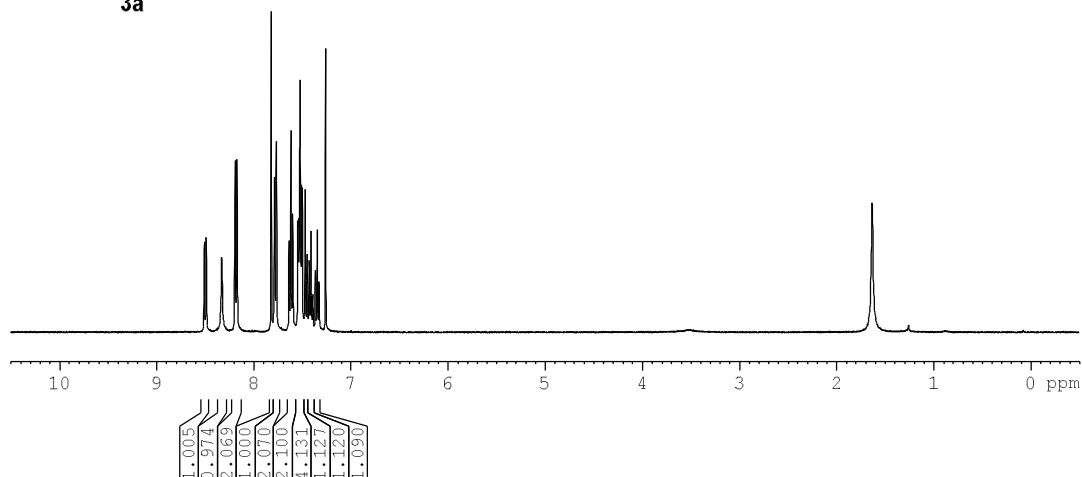

Current Data Parameters  
NAME 20161109  
EXPNO 4  
PROCNO 1

F2 - Acquisition Parameters  
Date\_ 20161109  
Time 4.48  
INSTRUM spect  
PROBHD 5 mm BBO BB-1H  
PULPROG zg30  
TD 32768  
SOLVENT CDCl3  
NS 16  
DS 0  
SWH 7246.377 Hz  
FIDRES 0.221142 Hz  
AQ 2.2609921 sec  
RG 114  
DW 69.000 usec  
DE 6.50 usec  
TE 296.0 K  
D1 2.00000000 sec  
TD0

===== CHANNEL f1 =====  
NUC1 1H  
P1 14.40 usec  
PL1 1.80 dB  
SFO1 400.1324008 MHz

F2 - Processing parameters  
SI 16584  
SF 400.1300098 MHz  
WDW EM  
SSB 0  
LB 0 Hz  
GB 0  
PC 1.00

2,4-diphenyl-5-carboline

151.43  
143.11  
141.01  
140.74  
137.20  
132.37  
130.20  
129.69  
128.98  
128.90  
128.35  
128.24  
128.05  
127.36  
123.31  
121.60  
120.61  
117.43  
111.41  
77.55  
77.23  
76.91

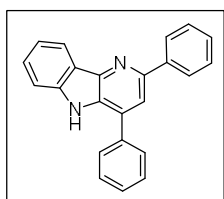

3a

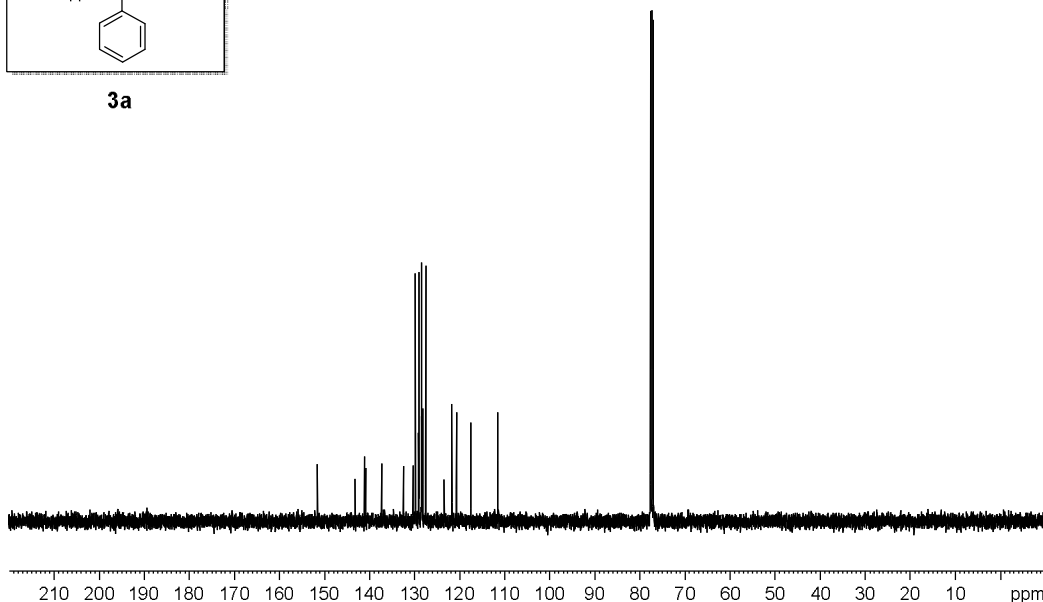

Current Data Parameters  
NAME A(no substrate)  
EXPNO 713  
PROCNO 1

F2 - Acquisition Parameters  
Date\_ 20121006  
Time 15.42  
INSTRUM spect  
PROBHD 5 mm BBO BB-1H  
PULPROG zgpg30  
TD 32768  
SOLVENT CDCl3  
NS 100  
DS 0  
SWH 24038.461 Hz  
FIDRES 0.733596 Hz  
AQ 0.6815744 sec  
RG 2048  
DW 20.800 usec  
DE 6.50 usec  
TE 299.3 K  
D1 2.00000000 sec  
D11 0.03000000 sec  
TD0 1

===== CHANNEL f1 =====  
NUC1 13C  
P1 9.40 usec  
PL1 7.00 dB  
SFO1 100.6233325 MHz

===== CHANNEL f2 =====  
CPDPRG2 waltz16  
NUC2 1H  
PCPD2 90.00 usec  
PL2 3.00 dB  
PL12 20.70 dB  
PL13 23.70 dB  
SFO2 400.1316005 MHz

F2 - Processing parameters  
SI 32768  
SF 100.6127507 MHz  
WDW EM  
SSB 0  
LB 1.00 Hz  
GB 0  
PC 1.00

4-(2-fluorophenyl)-2-phenyl-δ-carboline

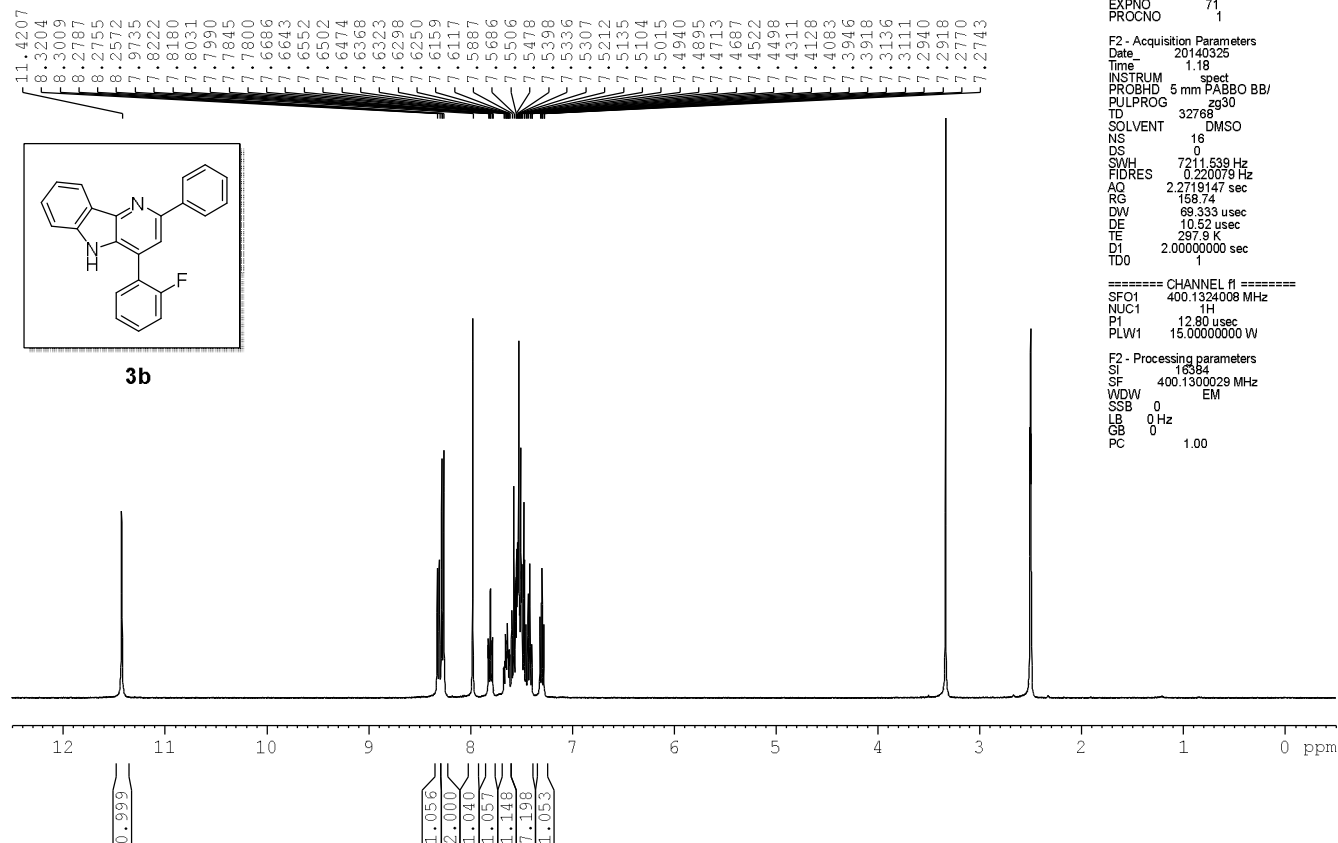

4-(2-fluorophenyl)-2-phenyl-δ-carboline

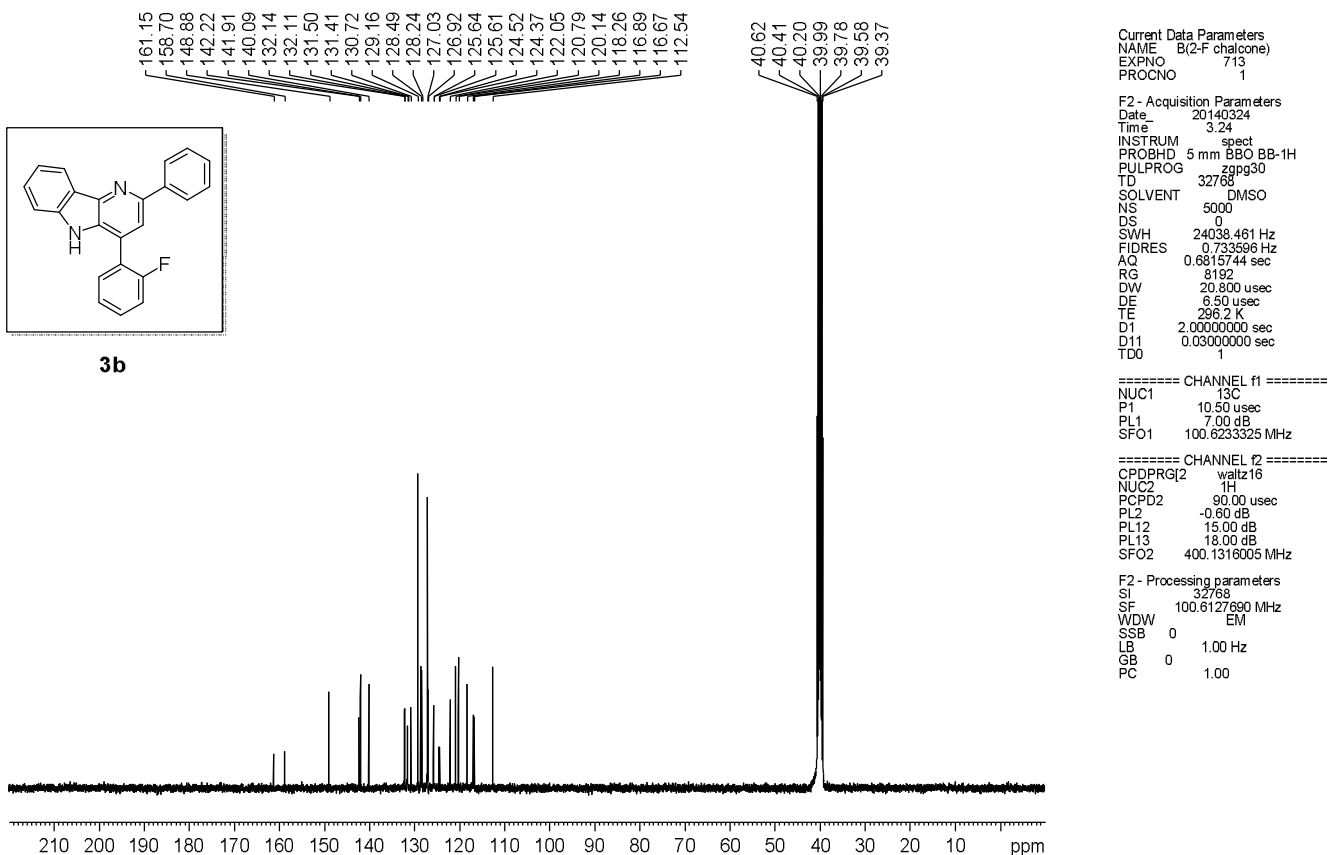

4-(2-chlorophenyl)-2-phenyl- $\delta$ -carboline

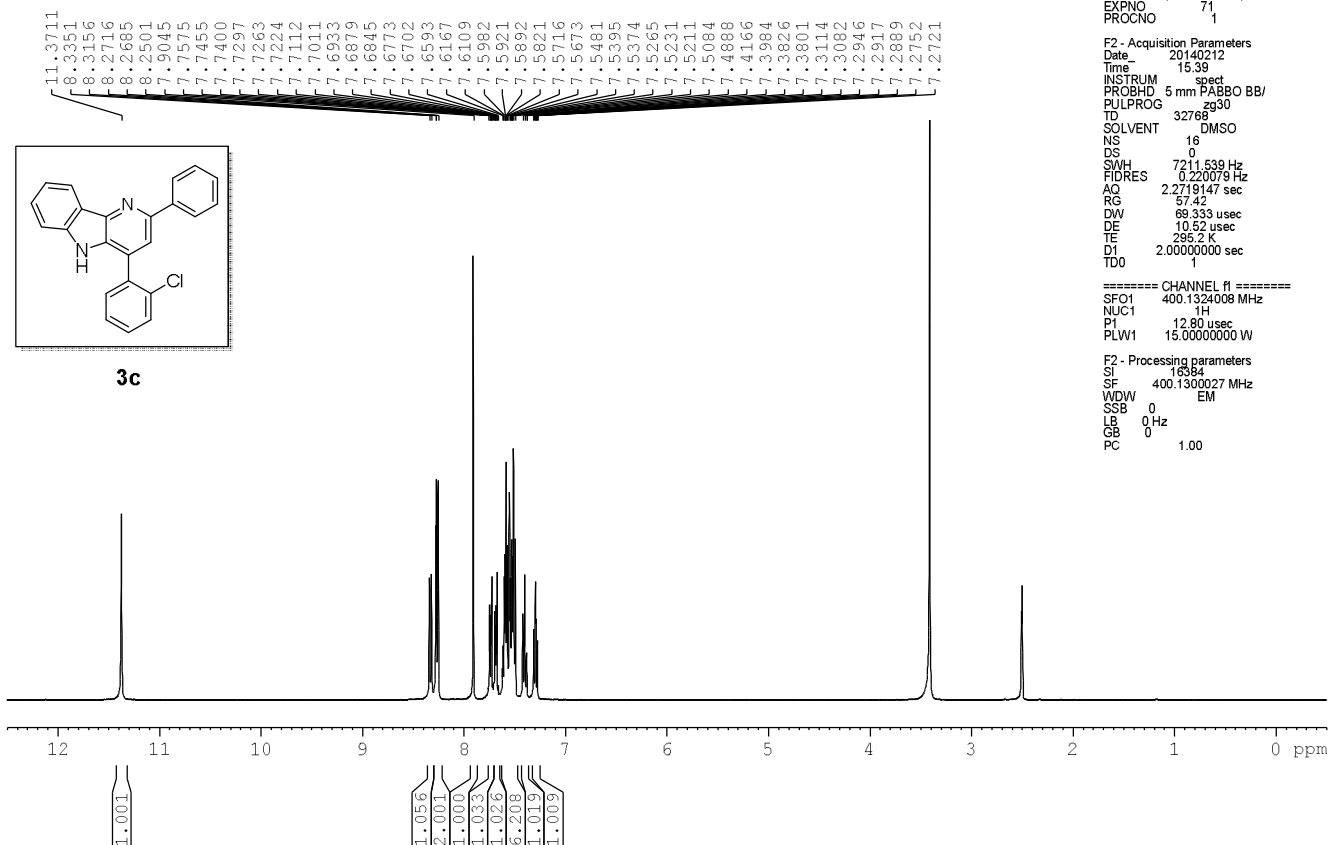

4-(2-chlorophenyl)-2-phenyl- $\delta$ -carboline

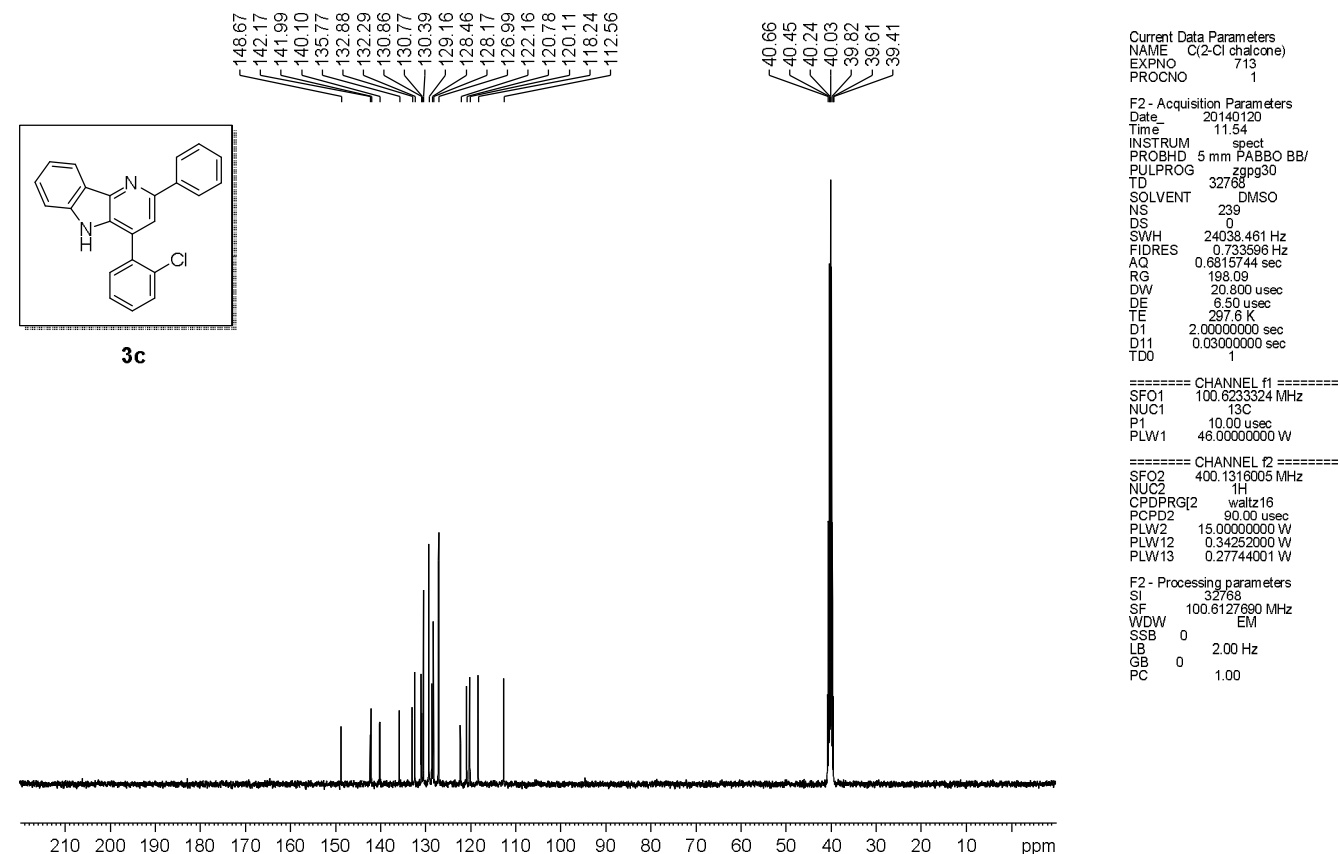

4-(2-bromophenyl)-2-phenyl- $\delta$ -carboline

Current Data Parameters  
 NAME D(2-Br chalcone)  
 EXPNO 71  
 PROCNO 1

F2 - Acquisition Parameters  
 Date\_ 20140321  
 Time 17.58  
 INSTRUM spect  
 PROBHD 5 mm BBO BB-1H  
 PULPROG zg30  
 TD 32768  
 SOLVENT DMSO  
 NS 16  
 DS 0  
 SWH 7246.377 Hz  
 FIDRES 0.221142 Hz  
 AQ 2.2609921 sec  
 RG 114  
 DW 69.000 usec  
 DE 6.50 usec  
 TE 296.0 K  
 D1 2.0000000 sec  
 TDO

===== CHANNEL f1 =====  
 NUC1 <sup>1</sup>H  
 P1 14.35 usec  
 PL1 -2.00 dB  
 SFO1 400.1324008 MHz  
 F2 - Processing parameters  
 SI 16384  
 SF 400.1300118 MHz  
 WDW EM  
 SSB 0  
 LB 0 Hz  
 GB 0  
 PC 1.00

11.3053  
 8.2935  
 8.2740  
 8.2448  
 8.2416  
 8.2374  
 8.2237  
 7.8683  
 7.8685  
 7.8661  
 7.8537  
 7.6421  
 7.6370  
 7.6233  
 7.6181  
 7.6137  
 7.6115  
 7.5959  
 7.5936  
 7.5772  
 7.5743  
 7.5273  
 7.5257  
 7.5066  
 7.4929  
 7.4891  
 7.4731  
 7.4690  
 7.4021  
 7.3990  
 7.3963  
 7.3845  
 7.3807  
 7.3762  
 7.3647  
 7.3625  
 7.3597  
 7.2833  
 7.2787  
 7.2678  
 7.2634  
 7.2590  
 7.2480  
 7.2436

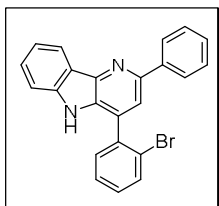

3d

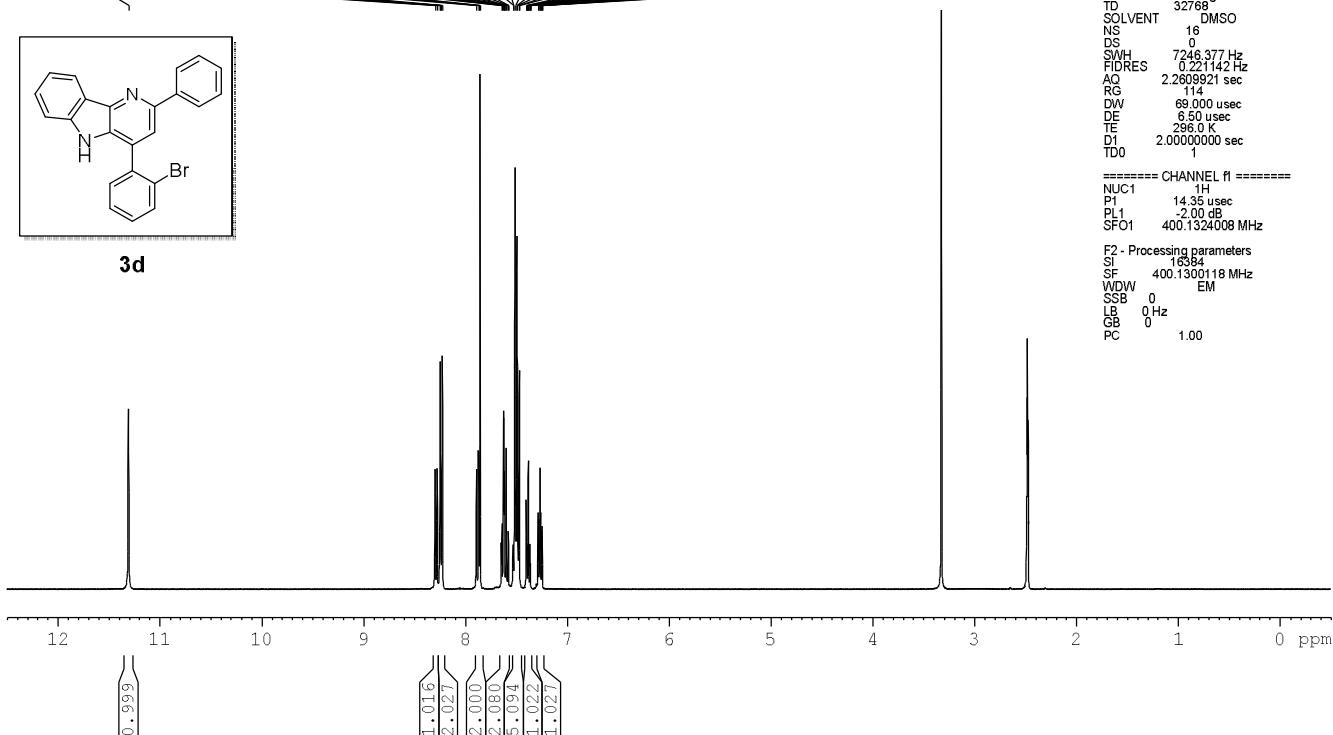

4-(2-bromophenyl)-2-phenyl- $\delta$ -carboline

Current Data Parameters  
 NAME D(2-Br chalcone)  
 EXPNO 713  
 PROCNO 1

F2 - Acquisition Parameters  
 Date\_ 20140321  
 Time 18.00  
 INSTRUM spect  
 PROBHD 5 mm BBO BB-1H  
 PULPROG zgpg30  
 TD 32768  
 SOLVENT DMSO  
 NS 1500  
 DS 0  
 SWH 24038.461 Hz  
 FIDRES 0.733596 Hz  
 AQ 0.6815744 sec  
 RG 8192  
 DW 20.800 usec  
 DE 6.50 usec  
 TE 296.0 K  
 D1 2.0000000 sec  
 D11 0.0300000 sec  
 TDO 1

===== CHANNEL f1 =====  
 NUC1 <sup>13</sup>C  
 P1 9.40 usec  
 PL1 7.00 dB  
 SFO1 100.6233325 MHz

===== CHANNEL f2 =====  
 CPDPRG2 waltz16  
 NUC2 <sup>1</sup>H  
 PCPD2 90.00 usec  
 PL2 -2.00 dB  
 PL12 13.95 dB  
 PL13 17.00 dB  
 SFO2 400.1316005 MHz

F2 - Processing parameters  
 SI 32768  
 SF 100.6127660 MHz  
 WDW EM  
 SSB 0  
 LB 1.00 Hz  
 GB 0  
 PC 1.00

148.58  
 142.15  
 141.97  
 140.08  
 137.79  
 133.50  
 132.21  
 132.08  
 131.02  
 130.63  
 129.17  
 128.65  
 128.46  
 128.16  
 126.97  
 123.09  
 122.15  
 120.74  
 120.09  
 118.13  
 112.56  
 40.63  
 40.43  
 40.22  
 40.01  
 39.80  
 39.59  
 39.38

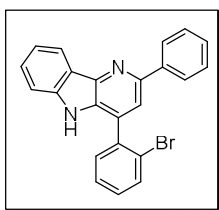

3d

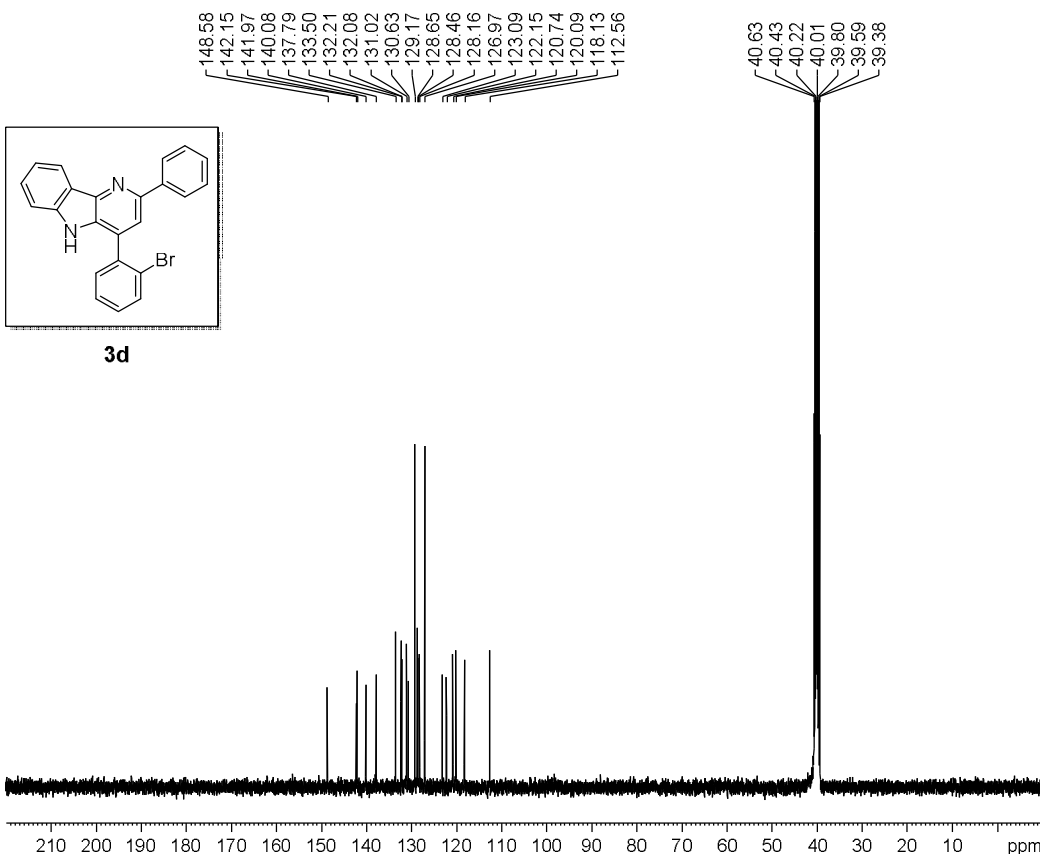

4-(naphthalen-1-yl)-2-phenyl-δ-carboline

8.5276  
8.1960  
8.1776  
8.0295  
8.0115  
7.9913  
7.8731  
7.7184  
7.6973  
7.6628  
7.6498  
7.6456  
7.6269  
7.6092  
7.5742  
7.5552  
7.5368  
7.5189  
7.5006  
7.4821  
7.4654  
7.4361  
7.4169  
7.3989  
7.3809  
7.3589  
7.3402  
7.3190  
7.2977  
7.2599

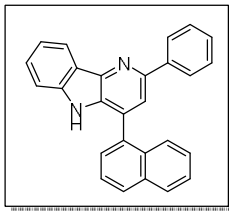

3e

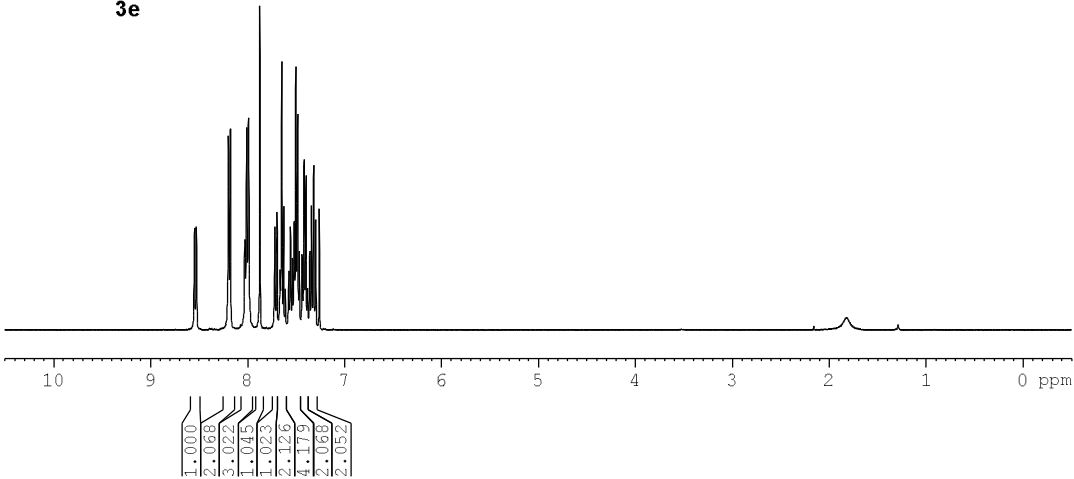

Current Data Parameters  
NAME E(1-naphthyl chalcone)  
EXPNO 71  
PROCNO 1  
F2 - Acquisition Parameters  
Date\_ 20131010  
Time 17.54  
INSTRUM spect  
PROBHD 5 mm BBO BB-1H  
PULPROG zg30  
TD 32768  
SOLVENT CDCl3  
NS 8  
DS 0  
SWH 7246.377 Hz  
FIDRES 0.221142 Hz  
AQ 2.2609921 sec  
RG 114  
DW 69.000 usec  
DE 6.50 usec  
TE 298.1 K  
D1 2.0000000 sec  
TDO

===== CHANNEL f1 =====  
NUC1 1H  
P1 11.90 usec  
PL1 3.00 dB  
SFO1 400.1324008 MHz

F2 - Processing parameters  
SI 18584  
SF 400.1300093 MHz  
WDW EM  
SSB 0  
LB 0 Hz  
GB 0  
PC 1.00

4-(naphthalen-1-yl)-2-phenyl-δ-carboline

151.03  
142.68  
140.90  
140.63  
134.46  
134.11  
131.38  
131.10  
129.41  
128.91  
128.87  
128.26  
128.08  
127.68  
127.39  
127.17  
126.67  
125.92  
125.65  
123.21  
121.64  
120.58  
119.29  
111.39  
77.55  
77.23  
76.91

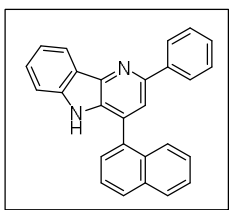

3e

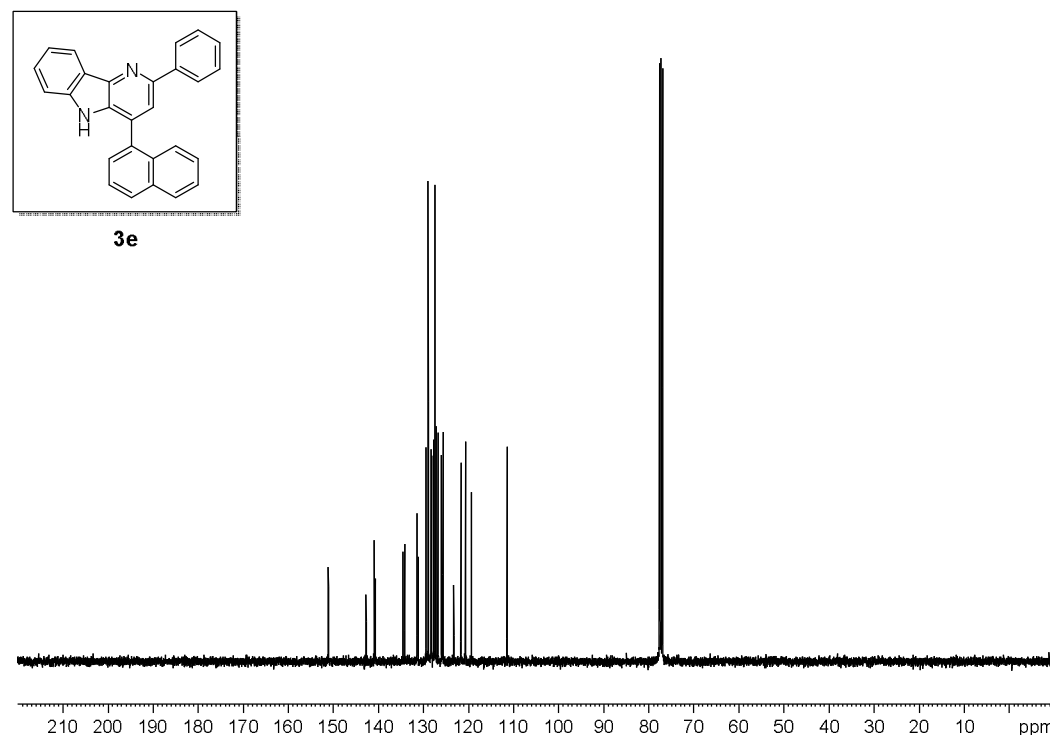

Current Data Parameters  
NAME E(1-naphthyl chalcone)  
EXPNO 713  
PROCNO 1

F2 - Acquisition Parameters  
Date\_ 20131010  
Time 19.20  
INSTRUM spect  
PROBHD 5 mm BBO BB-1H  
PULPROG zgpg30  
TD 32768  
SOLVENT CDCl3  
NS 647  
DS 0  
SWH 24038.461 Hz  
FIDRES 0.733596 Hz  
AQ 0.6815744 sec  
RG 8192  
DW 20.800 usec  
DE 6.50 usec  
TE 301.0 K  
D1 2.0000000 sec  
D11 0.0300000 sec  
TDO 1

===== CHANNEL f1 =====  
NUC1 13C  
P1 10.50 usec  
PL1 7.00 dB  
SFO1 100.6233325 MHz

===== CHANNEL f2 =====  
CPDPRG2 waltz16  
NUC2 1H  
PCPD2 90.00 usec  
PL2 -0.60 dB  
PL12 15.00 dB  
PL13 18.00 dB  
SFO2 400.1316005 MHz

F2 - Processing parameters  
SI 32768  
SF 100.6127509 MHz  
WDW EM  
SSB 0  
LB 1.00 Hz  
GB 0  
PC 1.00

4-(2-nitrophenyl)-2-phenyl-5-carboline

Current Data Parameters  
 NAME F(2-NO2 chalcone)  
 EXPNO 71  
 PROCNO 1

F2 - Acquisition Parameters  
 Date\_ 20140321  
 Time 16.45  
 INSTRUM spect  
 PROBHD 5 mm BBO BB-1H  
 PULPROG zg30  
 TD 32768  
 SOLVENT DMSO  
 NS 16  
 DS 0  
 SWH 7246.377 Hz  
 FIDRES 0.221142 Hz  
 AQ 2.2609921 sec  
 RG 114  
 DW 69.000 usec  
 DE 6.50 usec  
 TE 296.2 K  
 D1 2.00000000 sec  
 TDO

===== CHANNEL f1 =====  
 NUC1 1H  
 P1 14.35 usec  
 PL1 -2.00 dB  
 SFO1 400.1324008 MHz  
 F2 - Processing parameters  
 SI 16384  
 SF 400.1300118 MHz  
 WDW EM  
 SSB 0  
 LB 0 Hz  
 GB 0  
 PC 1.00

11.4094  
 8.3330  
 8.3305  
 8.3124  
 8.3099  
 8.3044  
 8.2845  
 8.2392  
 8.2365  
 8.2183  
 7.9589  
 7.9563  
 7.9402  
 7.9375  
 7.9214  
 7.9187  
 7.8810  
 7.8477  
 7.8441  
 7.8267  
 7.8245  
 7.8083  
 7.8049  
 7.7950  
 7.7919  
 7.7762  
 7.7730  
 7.5274  
 7.5253  
 7.5076  
 7.5048  
 7.4896  
 7.4702  
 7.4014  
 7.3831  
 7.3650  
 7.2996  
 7.2948  
 7.2843  
 7.2799  
 7.2752  
 7.2651  
 7.2601

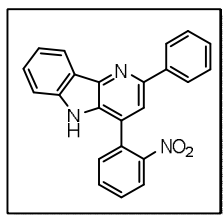

3f

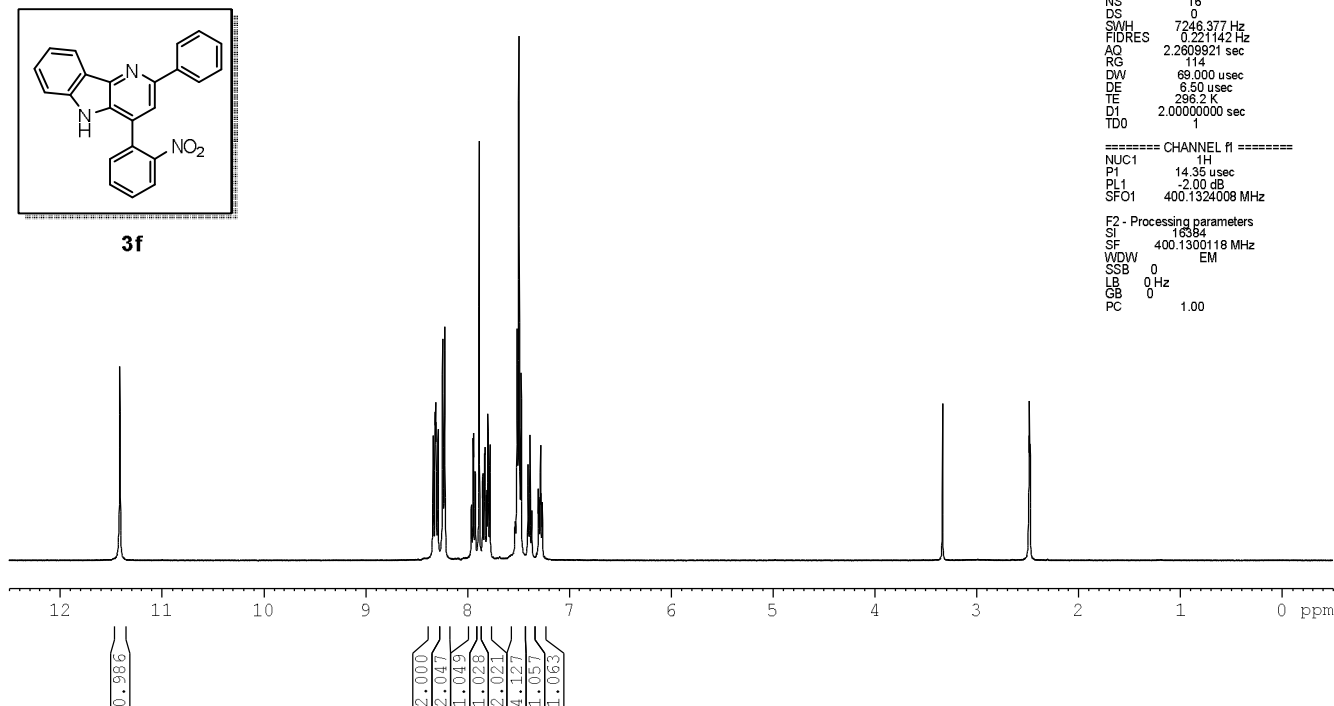

4-(2-nitrophenyl)-2-phenyl-5-carboline

Current Data Parameters  
 NAME F(2-NO2 chalcone)  
 EXPNO 713  
 PROCNO 1

F2 - Acquisition Parameters  
 Date\_ 20140321  
 Time 17.11  
 INSTRUM spect  
 PROBHD 5 mm PABBO BB/  
 PULPROG zgpg30  
 TD 32768  
 SOLVENT DMSO  
 NS 1293  
 DS 0  
 SWH 24038.461 Hz  
 FIDRES 0.733596 Hz  
 AQ 0.6815744 sec  
 RG 198.09  
 DW 20.900 usec  
 DE 6.50 usec  
 TE 298.1 K  
 D1 2.00000000 sec  
 D11 0.03000000 sec  
 TDO 1

===== CHANNEL f1 =====  
 SFO1 100.6233324 MHz  
 NUC1 13C  
 P1 10.00 usec  
 PLW1 46.00000000 W  
 ===== CHANNEL f2 =====  
 SFO2 400.1316005 MHz  
 NUC2 1H  
 CPDPRG2 waltz16  
 PCPD2 90.00 usec  
 PLW2 15.00000000 W  
 PLW12 0.34252000 W  
 PLW13 0.27744001 W

F2 - Processing parameters  
 SI 32768  
 SF 100.6127660 MHz  
 WDW EM  
 SSB 0  
 LB 2.00 Hz  
 GB 0  
 PC 1.00

148.82  
 148.68  
 141.96  
 141.93  
 139.94  
 134.58  
 133.22  
 131.58  
 130.80  
 130.64  
 129.87  
 129.16  
 128.53  
 128.24  
 126.96  
 125.44  
 122.22  
 120.81  
 120.26  
 116.99  
 112.53  
 40.65  
 40.44  
 40.24  
 40.03  
 39.82  
 39.61  
 39.40

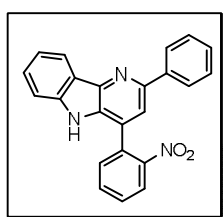

3f

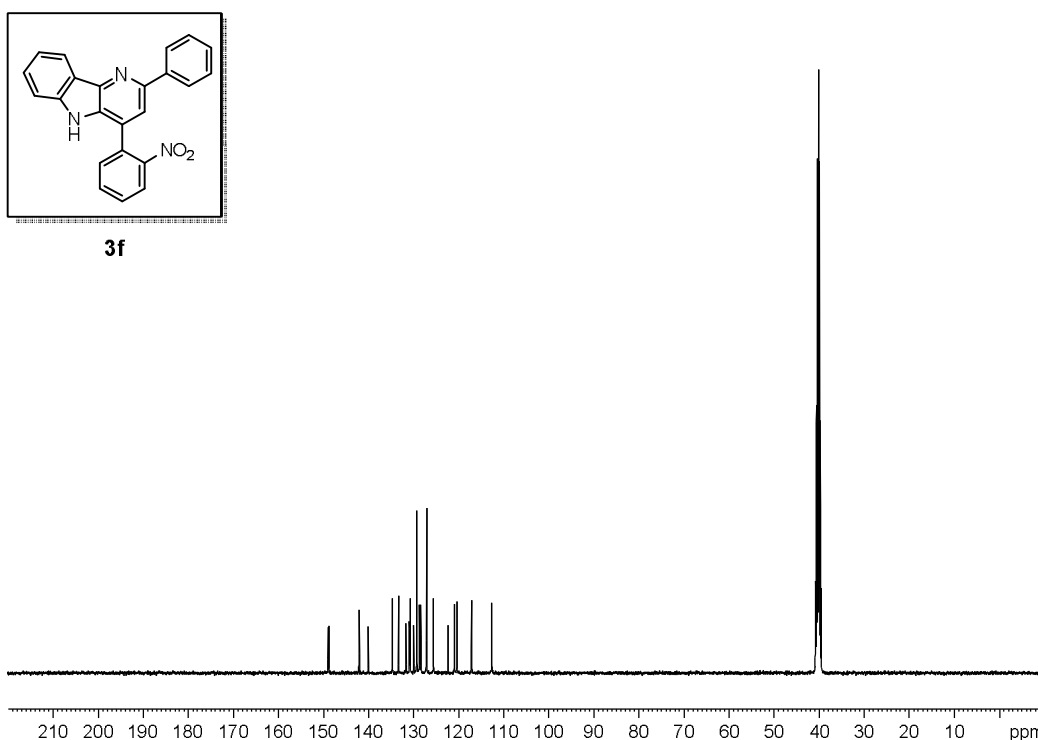



4-(3-methoxyphenyl)-2-phenyl-δ-carboline

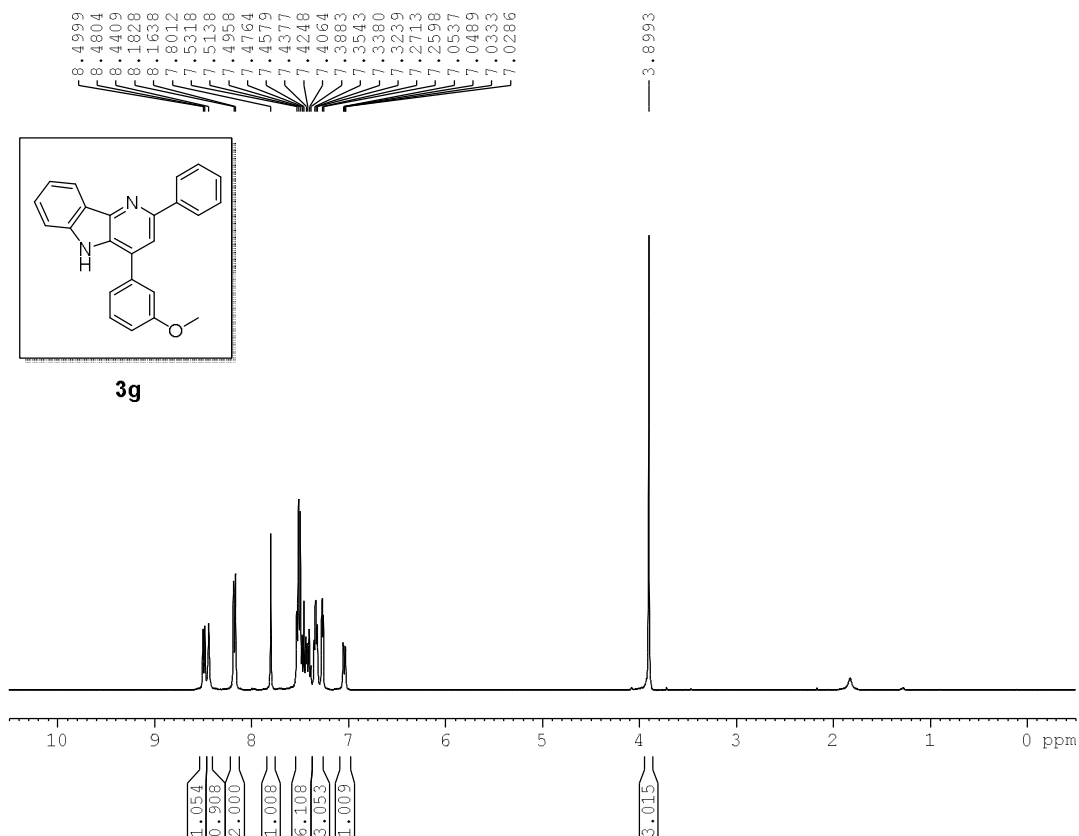

Current Data Parameters  
 NAME G(3-OMe chalcone)  
 EXPNO 71  
 PROCNO 1

F2 - Acquisition Parameters  
 Date\_ 20131010  
 Time 18.17  
 INSTRUM spect  
 PROBHD 5 mm BBO BB-1H  
 PULPROG zg30  
 TD 32768  
 SOLVENT CDCl3  
 NS 8  
 DS 0  
 SWH 7246.377 Hz  
 FIDRES 0.221142 Hz  
 AQ 2.2609921 sec  
 RG 114  
 DW 69.000 usec  
 DE 6.50 usec  
 TE 298.1 K  
 D1 2.00000000 sec  
 TDO

===== CHANNEL f1 =====  
 NUC1 1H  
 P1 11.90 usec  
 PL1 3.00 dB  
 SFO1 400.1324008 MHz

F2 - Processing parameters  
 SI 16584  
 SF 400.1300095 MHz  
 WDW EM  
 SSB 0  
 LB 0 Hz  
 GB 0  
 PC 1.00

4-(3-methoxyphenyl)-2-phenyl-δ-carboline

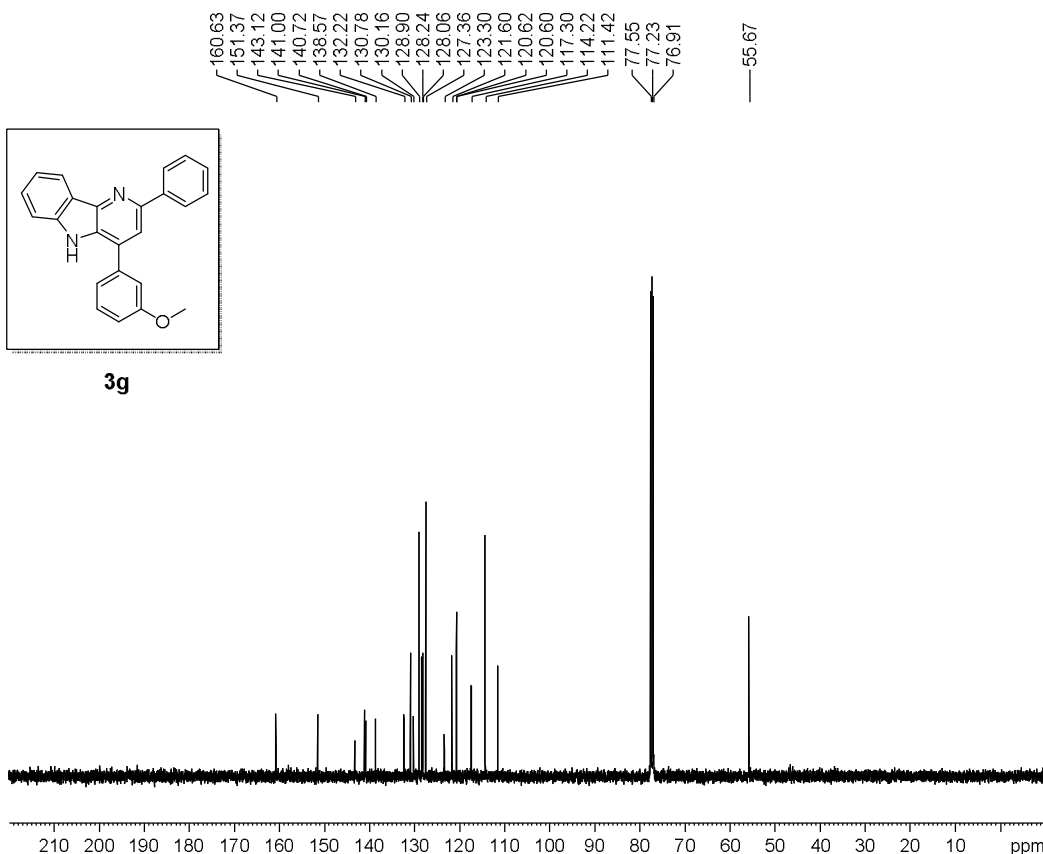

Current Data Parameters  
 NAME G(3-OMe chalcone)  
 EXPNO 713  
 PROCNO 1

F2 - Acquisition Parameters  
 Date\_ 20131010  
 Time 18.22  
 INSTRUM spect  
 PROBHD 5 mm BBO BB-1H  
 PULPROG zgpg30  
 TD 32768  
 SOLVENT CDCl3  
 NS 151  
 DS 0  
 SWH 24038.461 Hz  
 FIDRES 0.733596 Hz  
 AQ 0.6815744 sec  
 RG 8192  
 DW 20.800 usec  
 DE 6.50 usec  
 TE 300.0 K  
 D1 2.00000000 sec  
 D11 0.03000000 sec  
 TDO 1

===== CHANNEL f1 =====  
 NUC1 13C  
 P1 10.50 usec  
 PL1 7.00 dB  
 SFO1 100.6233325 MHz

===== CHANNEL f2 =====  
 CPDPRG2 waltz16  
 NUC2 1H  
 PCPD2 90.00 usec  
 PL2 -0.60 dB  
 PL12 15.00 dB  
 PL13 18.00 dB  
 SFO2 400.1316005 MHz

F2 - Processing parameters  
 SI 32768  
 SF 100.6127510 MHz  
 WDW EM  
 SSB 0  
 LB 1.00 Hz  
 GB 0  
 PC 1.00

4-(benzo[d][1,3]dioxol-5-yl)-2-phenyl- $\delta$ -carboline

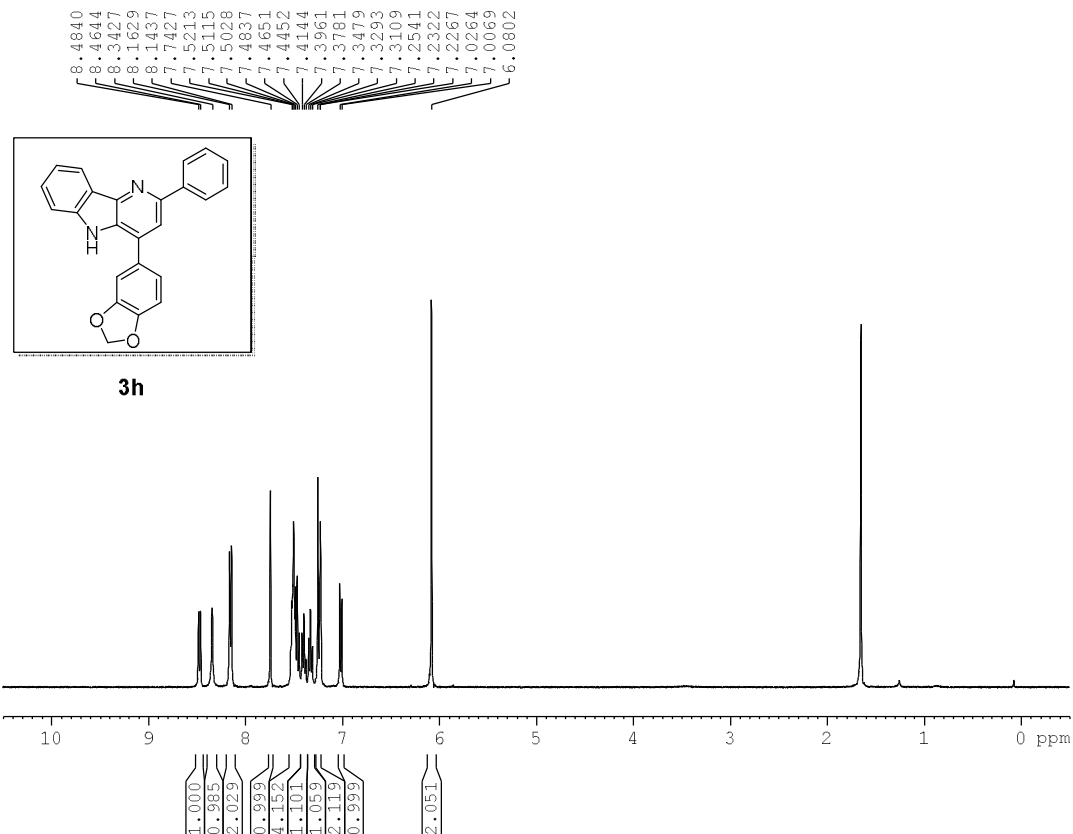

Current Data Parameters  
 NAME H(piperonyl chalcone)  
 EXPNO 71  
 PROCNO 1

F2 - Acquisition Parameters  
 Date\_ 20131011  
 Time 21.48  
 INSTRUM spect  
 PROBHD 5 mm BBO BB-1H  
 PULPROG zg30  
 TD 32768  
 SOLVENT CDCl3  
 NS 8  
 DS 0  
 SWH 7246.377 Hz  
 FIDRES 0.221142 Hz  
 AQ 2.2609921 sec  
 RG 322.5  
 DW 69.000 usec  
 DE 6.50 usec  
 TE 298.2 K  
 D1 2.0000000 sec  
 TDO

===== CHANNEL f1 =====  
 NUC1 1H  
 P1 11.90 usec  
 PL1 3.00 dB  
 SFO1 400.1324008 MHz

F2 - Processing parameters  
 SI 16584  
 SF 400.1300118 MHz  
 WDW EM  
 SSB 0  
 LB 0 Hz  
 GB 0  
 PC 1.00

4-(benzo[d][1,3]dioxol-5-yl)-2-phenyl- $\delta$ -carboline

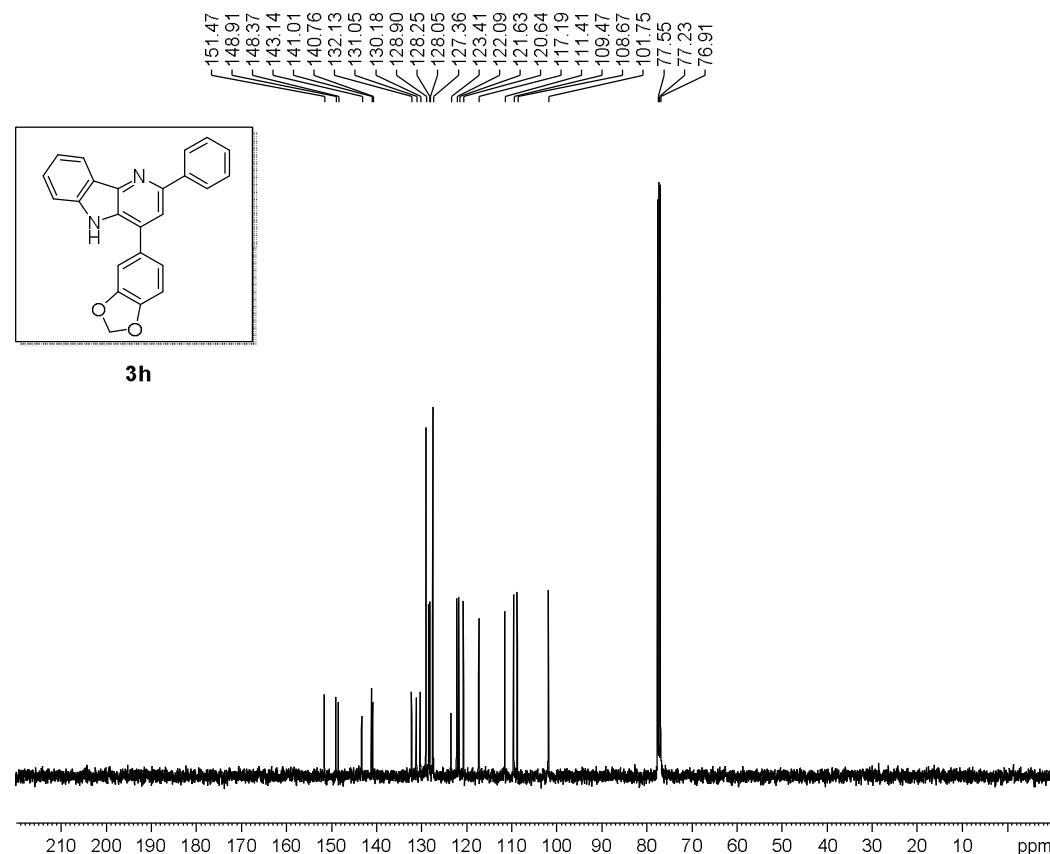

Current Data Parameters  
 NAME H(piperonyl chalcone)  
 EXPNO 713  
 PROCNO 1

F2 - Acquisition Parameters  
 Date\_ 20131012  
 Time 18.53  
 INSTRUM SPECT  
 PROBHD 5 mm PABBO BB/  
 PULPROG zgpg30  
 TD 32768  
 SOLVENT CDCl3  
 NS 400  
 DS 0  
 SWH 24038.461 Hz  
 FIDRES 0.733596 Hz  
 AQ 0.6815744 sec  
 RG 198.09  
 DW 20.900 usec  
 DE 6.50 usec  
 TE 298.2 K  
 D1 2.0000000 sec  
 D11 0.03000000 sec  
 TDO 1

===== CHANNEL f1 =====  
 SFO1 100.623324 MHz  
 NUC1 13C  
 P1 10.00 usec  
 PLW1 46.0000000 W

===== CHANNEL f2 =====  
 SFO2 400.1316005 MHz  
 NUC2 1H  
 CPDPRG2 waltz16  
 PCPD2 90.00 usec  
 PLW2 15.0000000 W  
 PLW12 0.34252000 W  
 PLW13 0.27744001 W

F2 - Processing parameters  
 SI 32768  
 SF 100.6127476 MHz  
 WDW EM  
 SSB 0  
 LB 2.00 Hz  
 GB 0  
 PC 1.00

2-phenyl-4-(thiophen-2-yl)-5-carboline

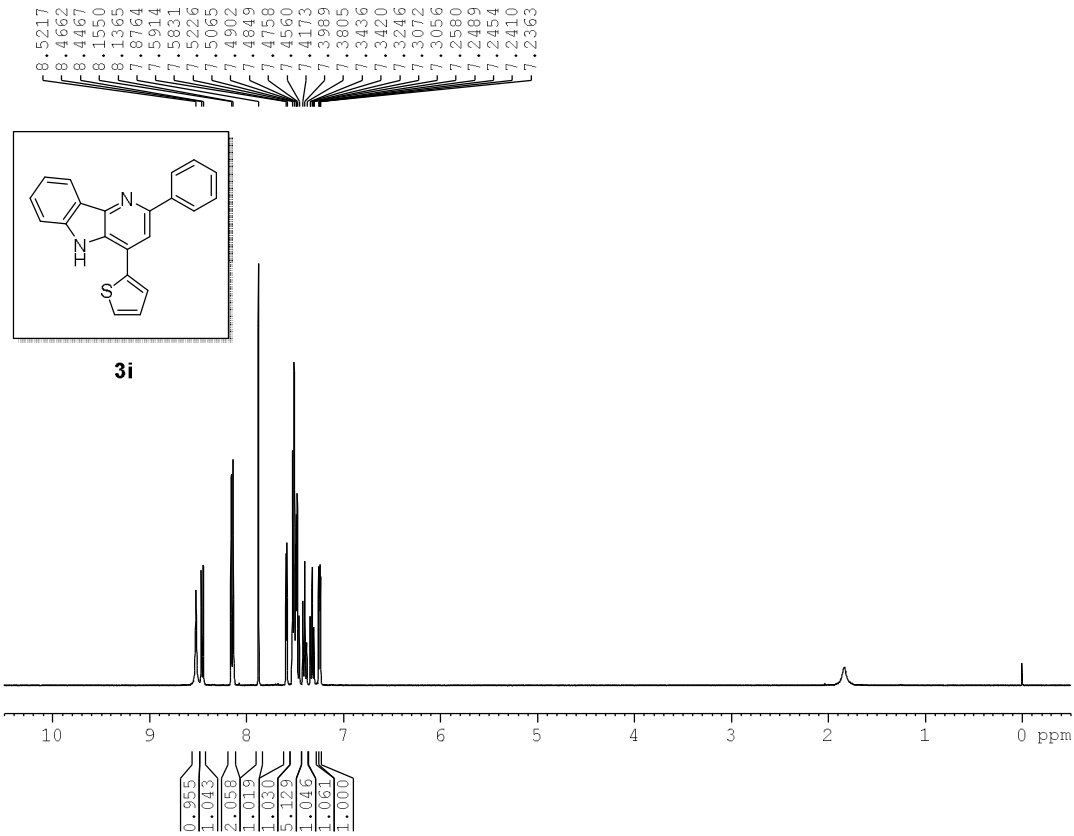

Current Data Parameters  
 NAME l(2-thiophene chalcone)  
 EXPNO 71  
 PROCNO 1

F2 - Acquisition Parameters  
 Date\_ 20160920  
 Time 21.16  
 INSTRUM spect  
 PROBHD 5 mm PABBO BB/  
 PULPROG zg30  
 TD 32768  
 SOLVENT CDCl3  
 NS 16  
 DS 0  
 SWH 7211.539 Hz  
 FIDRES 0.220079 Hz  
 AQ 2.2719147 sec  
 RG 39.72  
 DW 69.333 usec  
 DE 10.50 usec  
 TE 297.8 K  
 D1 2.0000000 sec  
 TDO 1

==== CHANNEL f1 =====  
 SFO1 400.1324009 MHz  
 NUC1 1H  
 P1 12.90 usec  
 PLW1 15.0000000 W

F2 - Processing parameters  
 SI 16584  
 SF 400.1300176 MHz  
 WDW EM  
 SSB 0  
 LB 0 Hz  
 GB 0  
 PC 1.00

2-phenyl-4-(thiophen-2-yl)-5-carboline

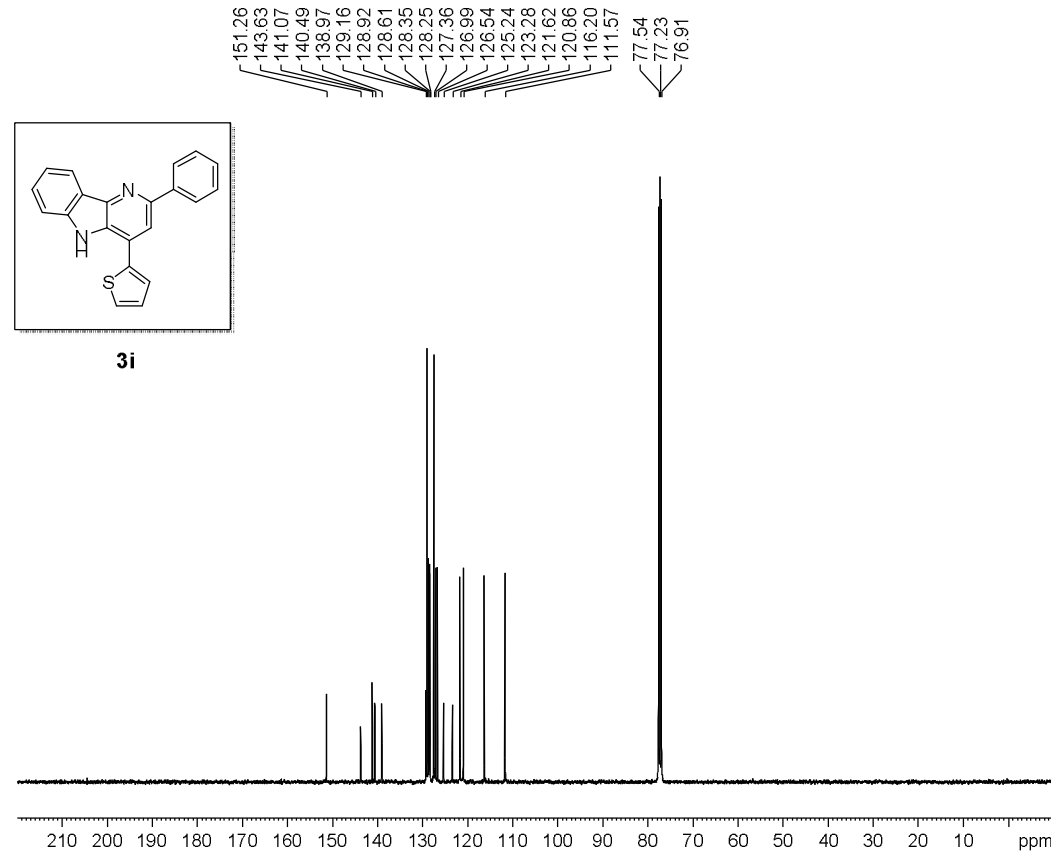

Current Data Parameters  
 NAME l(2-thiophene chalcone)  
 EXPNO 713  
 PROCNO 1

F2 - Acquisition Parameters  
 Date\_ 20160922  
 Time 17.32  
 INSTRUM spect  
 PROBHD 5 mm PABBO BB/  
 PULPROG zgpg30  
 TD 32768  
 SOLVENT CDCl3  
 NS 2000  
 DS 0  
 SWH 24038.461 Hz  
 FIDRES 0.733596 Hz  
 AQ 0.6815744 sec  
 RG 198.09  
 DW 20.900 usec  
 DE 6.50 usec  
 TE 297.5 K  
 D1 2.0000000 sec  
 D11 0.0300000 sec  
 TDO 1

==== CHANNEL f1 =====  
 SFO1 100.6228298 MHz  
 NUC1 13C  
 P1 10.00 usec  
 PLW1 47.5000000 W

==== CHANNEL f2 =====  
 SFO2 400.1316005 MHz  
 NUC2 1H  
 CPDPRG2 waltz16  
 PCPD2 90.00 usec  
 PLW2 15.0000000 W  
 PLW12 0.33750001 W  
 PLW13 0.27338001 W

F2 - Processing parameters  
 SI 32768  
 SF 100.6127516 MHz  
 WDW EM  
 SSB 0  
 LB 2.00 Hz  
 GB 0  
 PC 1.00

2-(4-chlorophenyl)-4-phenyl-5-carboline

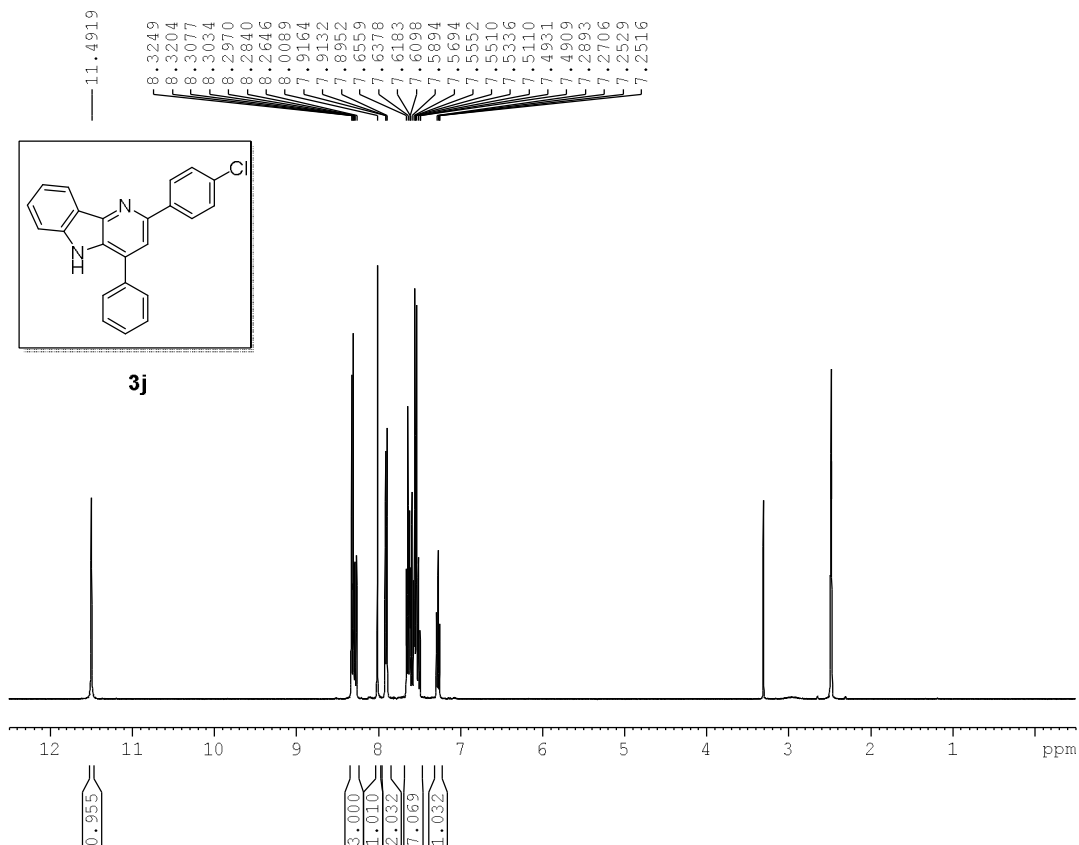

Current Data Parameters  
 NAME J(4-Cl chalcone)  
 EXPNO 71  
 PROCNO 1

F2 - Acquisition Parameters  
 Date\_ 20140320  
 Time 22.09  
 INSTRUM spect  
 PROBHD 5 mm BBO BB-1H  
 PULPROG zg30  
 TD 32768  
 SOLVENT DMSO  
 NS 16  
 DS 0  
 SWH 7246.377 Hz  
 FIDRES 0.221142 Hz  
 AQ 2.2609921 sec  
 RG 181  
 DW 69.000 usec  
 DE 6.50 usec  
 TE 298.7 K  
 D1 2.0000000 sec  
 TDO 1

===== CHANNEL f1 =====  
 NUC1 1H  
 P1 14.35 usec  
 PL1 -2.00 dB  
 SFO1 400.1324008 MHz

F2 - Processing parameters  
 SI 16384  
 SF 400.1300118 MHz  
 WDW EM  
 SSB 0  
 LB 0 Hz  
 GB 0  
 PC 1.00

2-(4-chlorophenyl)-4-phenyl-5-carboline

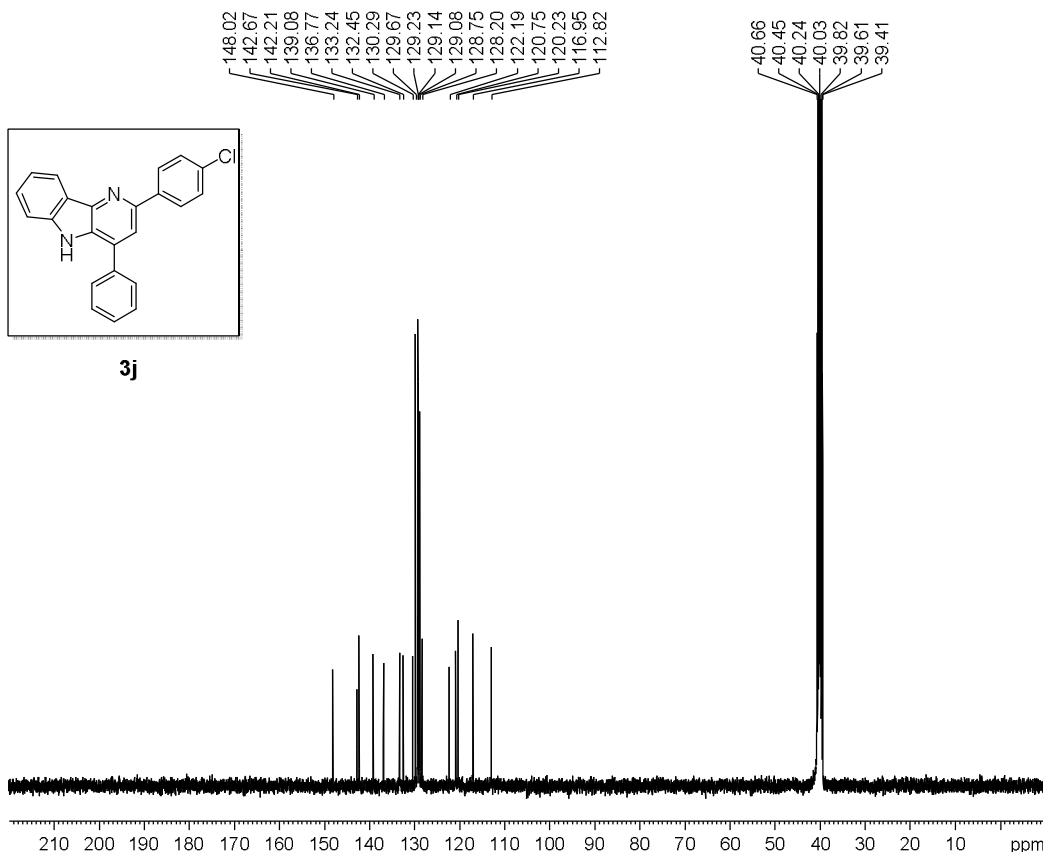

Current Data Parameters  
 NAME J(4-Cl chalcone)  
 EXPNO 713  
 PROCNO 1

F2 - Acquisition Parameters  
 Date\_ 20140320  
 Time 22.11  
 INSTRUM spect  
 PROBHD 5 mm BBO BB-1H  
 PULPROG zgpg30  
 TD 32768  
 SOLVENT DMSO  
 NS 3000  
 DS 0  
 SWH 24038.461 Hz  
 FIDRES 0.733596 Hz  
 AQ 0.6815744 sec  
 RG 16384  
 DW 20.800 usec  
 DE 6.50 usec  
 TE 298.8 K  
 D1 2.0000000 sec  
 D11 0.0300000 sec  
 TDO 1

===== CHANNEL f1 =====  
 NUC1 13C  
 P1 10.50 usec  
 PL1 7.00 dB  
 SFO1 100.6233325 MHz

===== CHANNEL f2 =====  
 CPDPRG2 waltz16  
 NUC2 1H  
 PCPD2 90.00 usec  
 PL2 -0.60 dB  
 PL12 15.00 dB  
 PL13 18.00 dB  
 SFO2 400.1316005 MHz

F2 - Processing parameters  
 SI 32768  
 SF 100.6127660 MHz  
 WDW EM  
 SSB 0  
 LB 1.00 Hz  
 GB 0  
 PC 1.00

2-(4-bromophenyl)-4-phenyl-δ-carboline

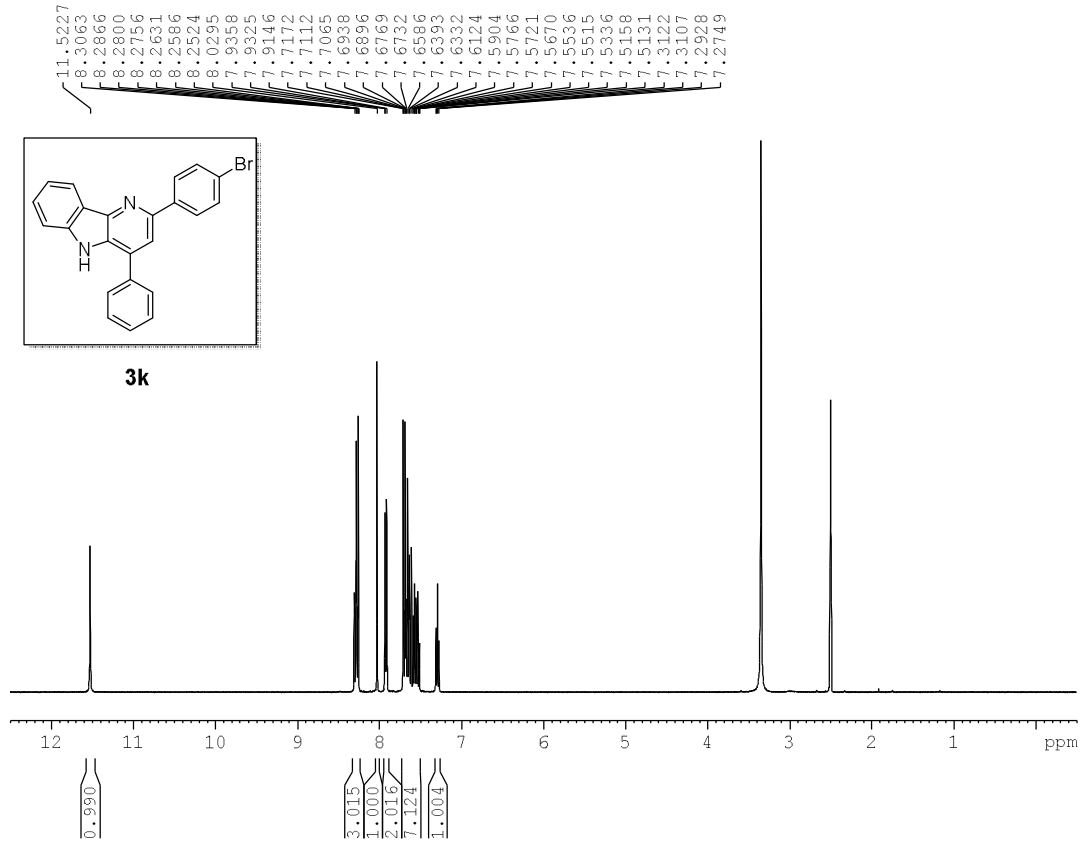

Current Data Parameters  
 NAME K(4-Br chalcone)  
 EXPNO 71  
 PROCNO 1

F2 - Acquisition Parameters  
 Date\_ 20140204  
 Time 20.16  
 INSTRUM spect  
 PROBHD 5 mm BBO BB-1H  
 PULPROG zg30  
 TD 32768  
 SOLVENT DMSO  
 NS 16  
 DS 0  
 SWH 7246.377 Hz  
 FIDRES 0.221142 Hz  
 AQ 2.2609921 sec  
 RG 114  
 DW 69.000 usec  
 DE 6.50 usec  
 TE 298.5 K  
 D1 2.0000000 sec  
 TDO 1

==== CHANNEL f1 =====  
 NUC1 1H  
 P1 11.90 usec  
 PL1 3.00 dB  
 SFO1 400.1324008 MHz

F2 - Processing parameters  
 SI 18584  
 SF 400.1300027 MHz  
 WDW EM  
 SSB 0  
 LB 0 Hz  
 GB 0  
 PC 1.00

2-(4-bromophenyl)-4-phenyl-δ-carboline

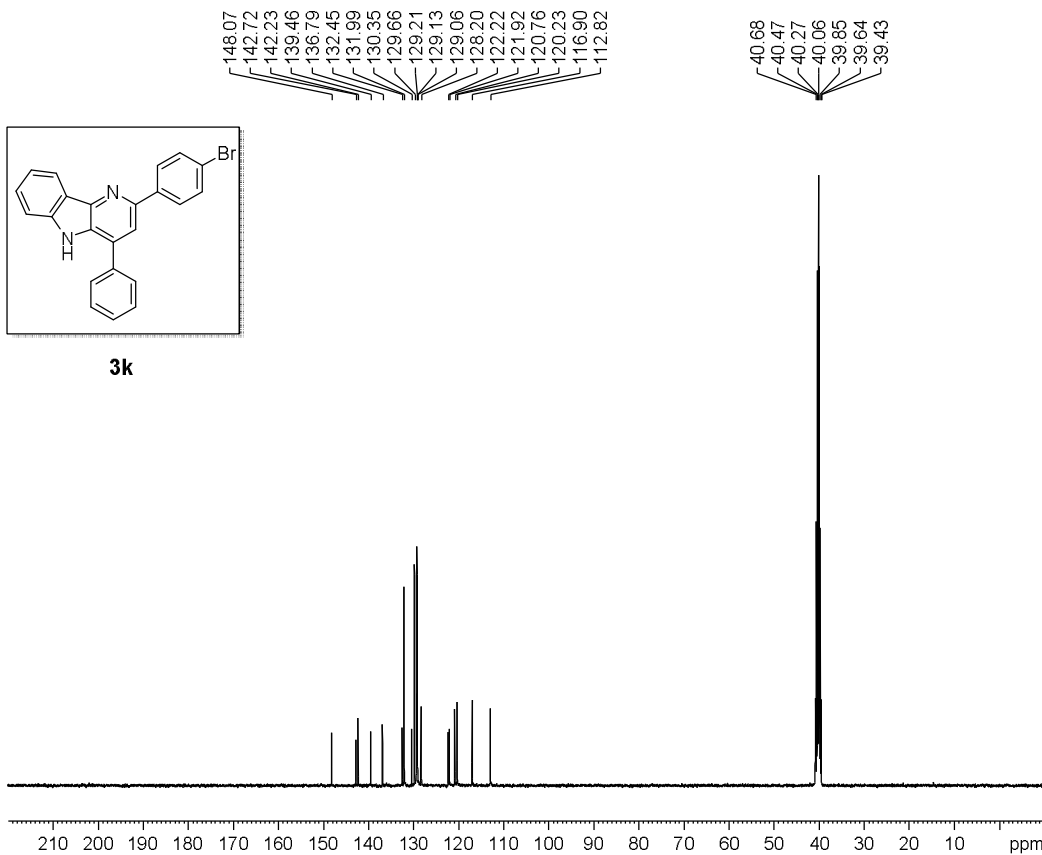

Current Data Parameters  
 NAME K(4-Br chalcone)  
 EXPNO 713  
 PROCNO 1

F2 - Acquisition Parameters  
 Date\_ 20131113  
 Time 17.37  
 INSTRUM SPECT  
 PROBHD 5 mm PABBO BB/  
 PULPROG zgpg30  
 TD 32768  
 SOLVENT DMSO  
 NS 1000  
 DS 0  
 SWH 24038.461 Hz  
 FIDRES 0.733596 Hz  
 AQ 0.6815744 sec  
 RG 198.09  
 DW 20.900 usec  
 DE 6.50 usec  
 TE 299.1 K  
 D1 2.0000000 sec  
 D11 0.03000000 sec  
 TDO 1

==== CHANNEL f1 =====  
 SFO1 100.6233324 MHz  
 NUC1 13C  
 P1 10.00 usec  
 PLW1 46.0000000 W

==== CHANNEL f2 =====  
 SFO2 400.1316005 MHz  
 NUC2 1H  
 CPDPRG2 waltz16  
 PCPD2 90.00 usec  
 PLW2 15.0000000 W  
 PLW12 0.34252000 W  
 PLW13 0.27744001 W

F2 - Processing parameters  
 SI 32768  
 SF 100.6127660 MHz  
 WDW EM  
 SSB 0  
 LB 2.00 Hz  
 GB 0  
 PC 1.00

2-(4-nitrophenyl)-4-phenyl-5-carboline

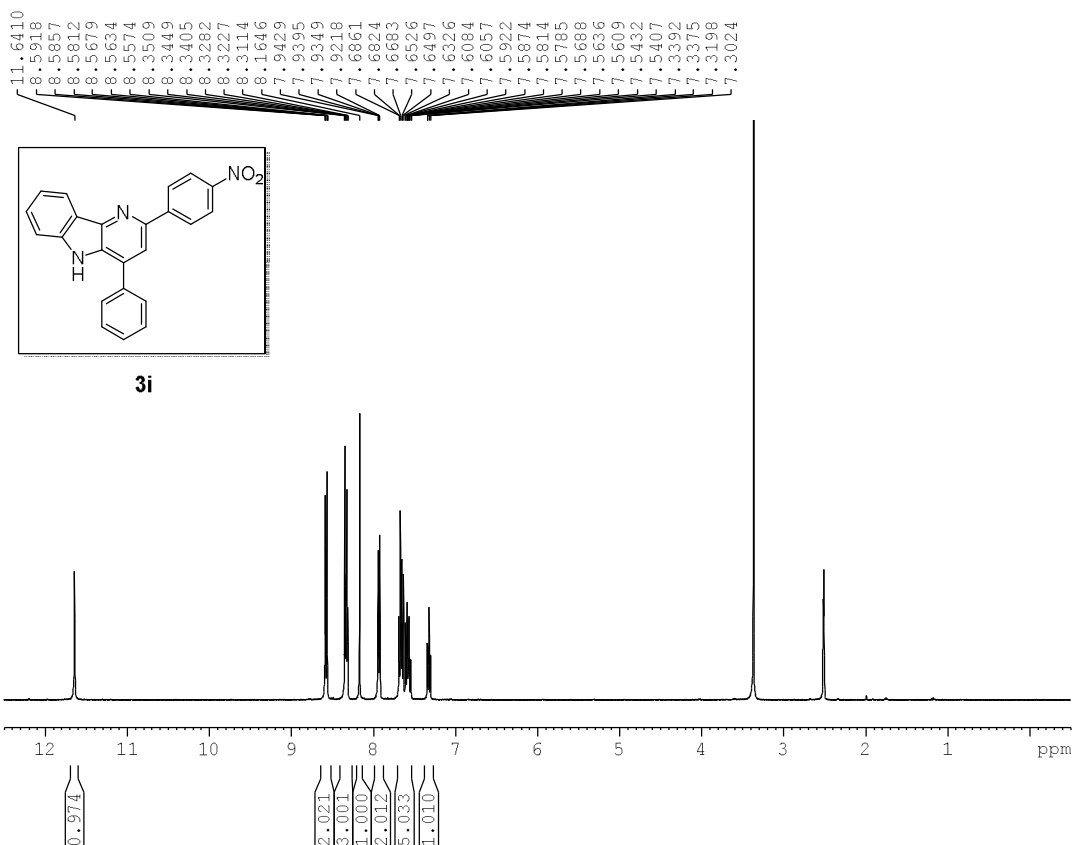

Current Data Parameters  
 NAME L(4-NO2 chalcone)  
 EXPNO 71  
 PROCNO 1

F2 - Acquisition Parameters  
 Date\_ 20140313  
 Time\_ 20.27  
 INSTRUM spect  
 PROBHD 5 mm PABBO BB/  
 PULPROG zg30  
 TD 32768  
 SOLVENT DMSO  
 NS 16  
 DS 0  
 SWH 7211.539 Hz  
 FIDRES 0.220079 Hz  
 AQ 2.2719147 sec  
 RG 78.51  
 DW 69.333 usec  
 DE 10.52 usec  
 TE 297.8 K  
 D1 2.0000000 sec  
 TDO 1

==== CHANNEL f1 =====  
 SFO1 400.1324009 MHz  
 NUC1 1H  
 P1 12.80 usec  
 PLW1 15.0000000 W  
 F2 - Processing parameters  
 SI 18584  
 SF 400.1300000 MHz  
 WDW EM  
 SSB 0  
 LB 0 Hz  
 GB 0  
 PC 1.00

2-(4-nitrophenyl)-4-phenyl-5-carboline

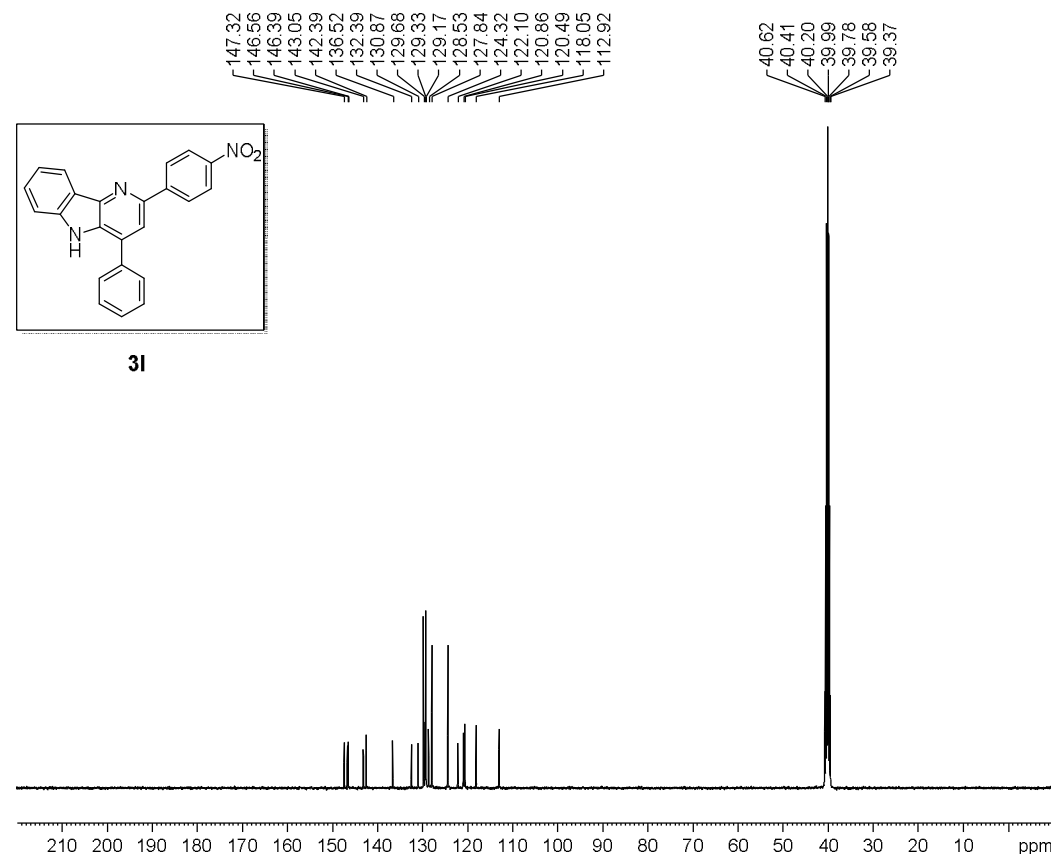

Current Data Parameters  
 NAME L(4-NO2 chalcone)  
 EXPNO 713  
 PROCNO 1

F2 - Acquisition Parameters  
 Date\_ 20140316  
 Time\_ 20.38  
 INSTRUM spect  
 PROBHD 5 mm PABBO BB/  
 PULPROG zgpg30  
 TD 32768  
 SOLVENT DMSO  
 NS 2000  
 DS 0  
 SWH 24038.461 Hz  
 FIDRES 0.733596 Hz  
 AQ 0.6815744 sec  
 RG 198.09  
 DW 20.900 usec  
 DE 6.50 usec  
 TE 297.9 K  
 D1 2.0000000 sec  
 D11 0.0300000 sec  
 TDO 1

==== CHANNEL f1 =====  
 SFO1 100.6233324 MHz  
 NUC1 13C  
 P1 10.00 usec  
 PLW1 46.0000000 W  
 ===== CHANNEL f2 =====  
 SFO2 400.1316005 MHz  
 NUC2 1H  
 CPDPRG2 waltz16  
 PCPD2 90.00 usec  
 PLW2 15.0000000 W  
 PLW12 0.34252000 W  
 PLW13 0.27744001 W

F2 - Processing parameters  
 SI 32768  
 SF 100.6127660 MHz  
 WDW EM  
 SSB 0  
 LB 2.00 Hz  
 GB 0  
 PC 1.00

2-(4-isopropylphenyl)-4-phenyl- $\delta$ -carboline

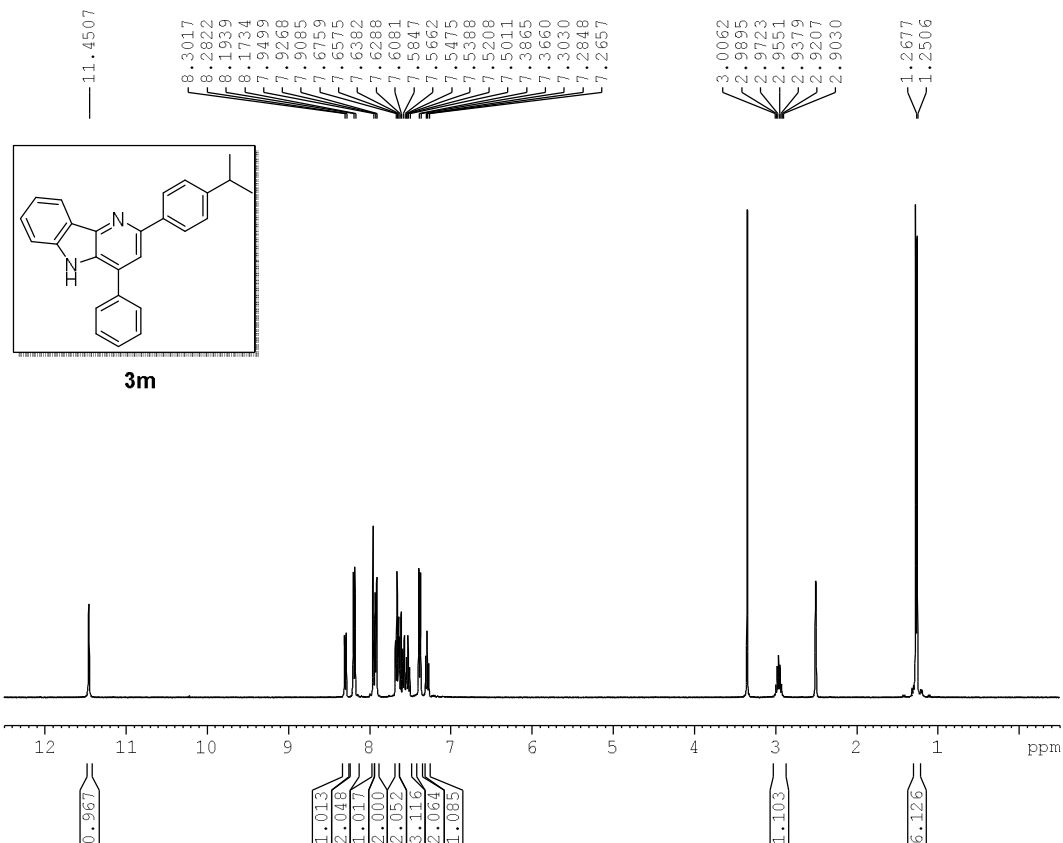

Current Data Parameters  
 NAME M(4-cumene chalcone)  
 EXPNO 71  
 PROCNO 1

F2 - Acquisition Parameters  
 Date\_ 20140414  
 Time 12.03  
 INSTRUM spect  
 PROBHD 5 mm BBO BB-1H  
 PULPROG zg30  
 TD 32768  
 SOLVENT DMSO  
 NS 16  
 DS 0  
 SWH 7246.377 Hz  
 FIDRES 0.221142 Hz  
 AQ 2.2609921 sec  
 RG 181  
 DW 69.000 usec  
 DE 6.50 usec  
 TE 299.6 K  
 DT 2.0000000 sec  
 TDO 1

==== CHANNEL f1 =====  
 NUC1 1H  
 P1 14.35 usec  
 PL1 -2.00 dB  
 SFO1 400.1324008 MHz

F2 - Processing parameters  
 SI 16384  
 SF 400.1300030 MHz  
 WDW EM  
 SSB 0  
 LB 0 Hz  
 GB 0  
 PC 1.00

2-(4-isopropylphenyl)-4-phenyl- $\delta$ -carboline

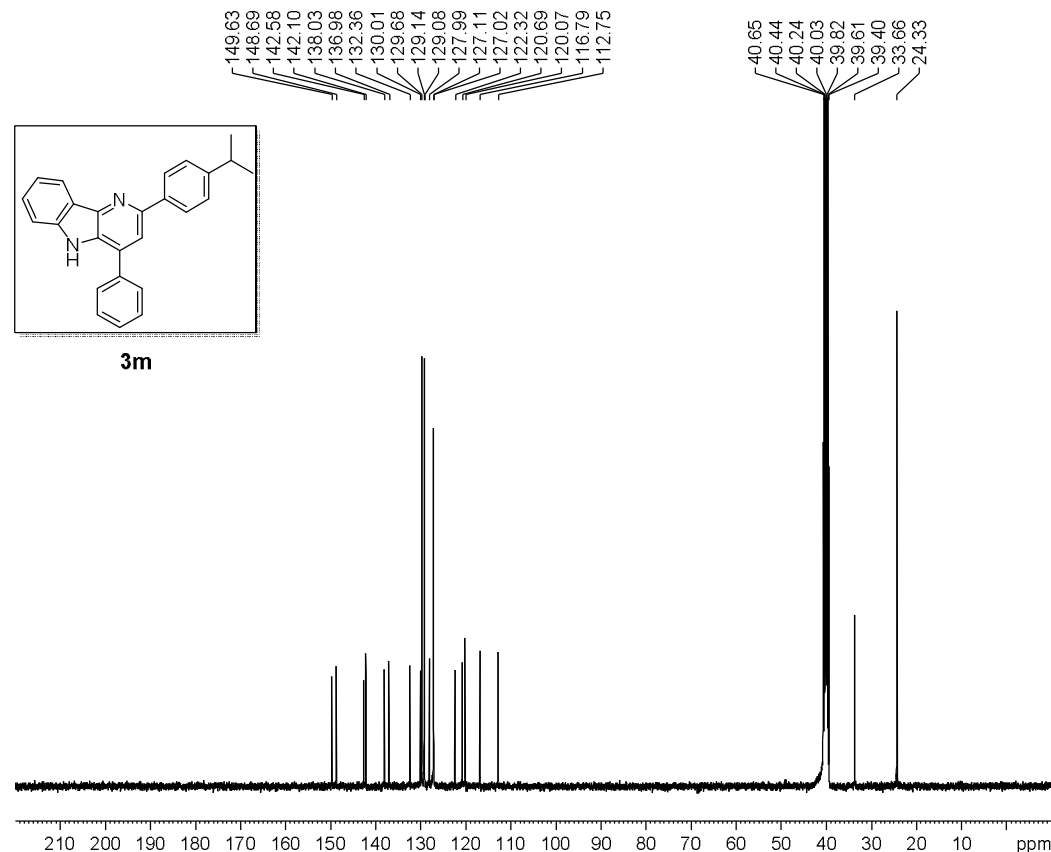

Current Data Parameters  
 NAME M(4-cumene chalcone)  
 EXPNO 713  
 PROCNO 1

F2 - Acquisition Parameters  
 Date\_ 20140413  
 Time 0.31  
 INSTRUM spect  
 PROBHD 5 mm BBO BB-1H  
 PULPROG zgpg30  
 TD 32768  
 SOLVENT DMSO  
 NS 7000  
 DS 0  
 SWH 24038.461 Hz  
 FIDRES 0.733596 Hz  
 AQ 0.6815744 sec  
 RG 16384  
 DW 20.800 usec  
 DE 6.50 usec  
 TE 300.4 K  
 D1 2.0000000 sec  
 D11 0.0300000 sec  
 TDO 1

==== CHANNEL f1 =====  
 NUC1 13C  
 P1 9.40 usec  
 PL1 7.00 dB  
 SFO1 100.6233325 MHz

==== CHANNEL f2 =====  
 CPDPRG2 waltz16  
 NUC2 1H  
 PCPD2 90.00 usec  
 PL2 -2.00 dB  
 PL12 13.95 dB  
 PL13 17.00 dB  
 SFO2 400.1316005 MHz

F2 - Processing parameters  
 SI 32768  
 SF 100.6127600 MHz  
 WDW EM  
 SSB 0  
 LB 1.00 Hz  
 GB 0  
 PC 1.00

2-(4-isobutylphenyl)-4-phenyl- $\delta$ -carboline

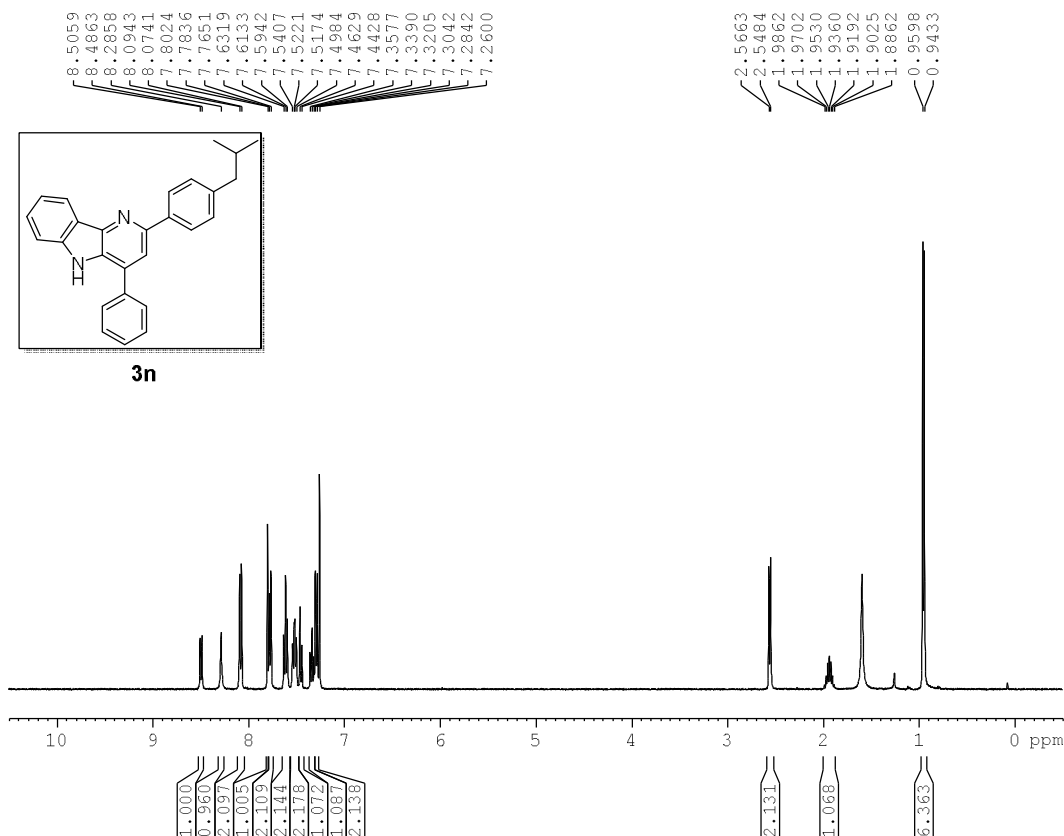

Current Data Parameters  
 NAME N(4-isobutyl chalcone)  
 EXPNO 71  
 PROCNO 1

F2 - Acquisition Parameters  
 Date\_ 20161105  
 Time 18.13  
 INSTRUM spect  
 PROBHD 5 mm PABBO BB/  
 PULPROG zg30  
 TD 32768  
 SOLVENT CDCl3  
 NS 16  
 DS 0  
 SWH 7211.539 Hz  
 FIDRES 0.220079 Hz  
 AQ 2.2719147 sec  
 RG 4.01  
 DW 69.333 usec  
 DE 10.50 usec  
 TE 298.4 K  
 D1 2.0000000 sec  
 TDO

==== CHANNEL f1 =====  
 SFO1 400.1324009 MHz  
 NUC1 1H  
 P1 12.90 usec  
 PLW1 15.00000000 W  
 F2 - Processing parameters  
 SI 16384  
 SF 400.1300102 MHz  
 WDW EM  
 SSB 0  
 LB 0 Hz  
 GB 0  
 PC 1.00

2-(4-isobutylphenyl)-4-phenyl- $\delta$ -carboline

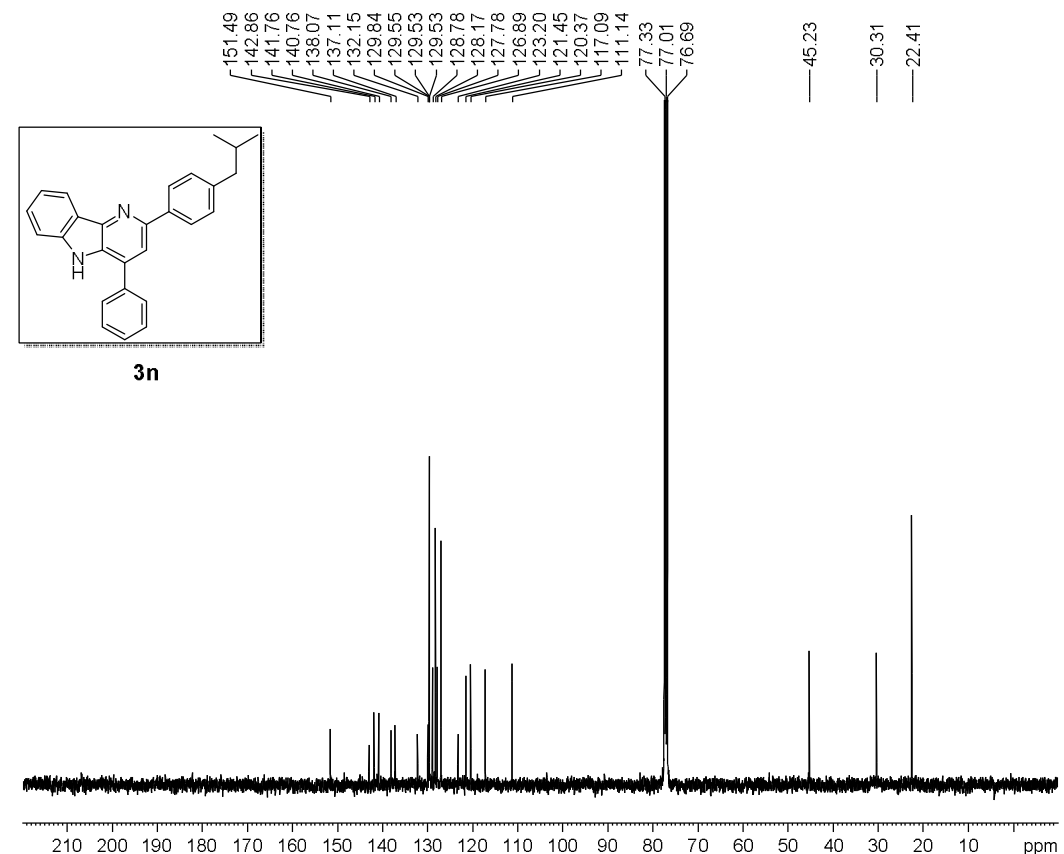

Current Data Parameters  
 NAME N(4-isobutyl chalcone)  
 EXPNO 713  
 PROCNO 1

F2 - Acquisition Parameters  
 Date\_ 20161105  
 Time 18.44  
 INSTRUM spect  
 PROBHD 5 mm PABBO BB/  
 PULPROG zgpg30  
 TD 32768  
 SOLVENT CDCl3  
 NS 1780  
 DS 0  
 SWH 24038.461 Hz  
 FIDRES 0.733596 Hz  
 AQ 0.6815744 sec  
 RG 198.09  
 DW 20.900 usec  
 DE 6.50 usec  
 TE 298.6 K  
 D1 2.0000000 sec  
 D11 0.03000000 sec  
 TDO 1

==== CHANNEL f1 =====  
 SFO1 100.6228298 MHz  
 NUC1 13C  
 P1 10.00 usec  
 PLW1 47.50000000 W  
 ==== CHANNEL f2 =====  
 SFO2 400.1316005 MHz  
 NUC2 1H  
 CPDPRG2 waltz16  
 PCPD2 90.00 usec  
 PLW2 15.00000000 W  
 PLW12 0.33750001 W  
 PLW13 0.27338001 W

F2 - Processing parameters  
 SI 32768  
 SF 100.6127685 MHz  
 WDW EM  
 SSB 0  
 LB 2.00 Hz  
 GB 0  
 PC 1.00



2-(4-(tert-butyl)phenyl)-4-phenyl-5-carboline

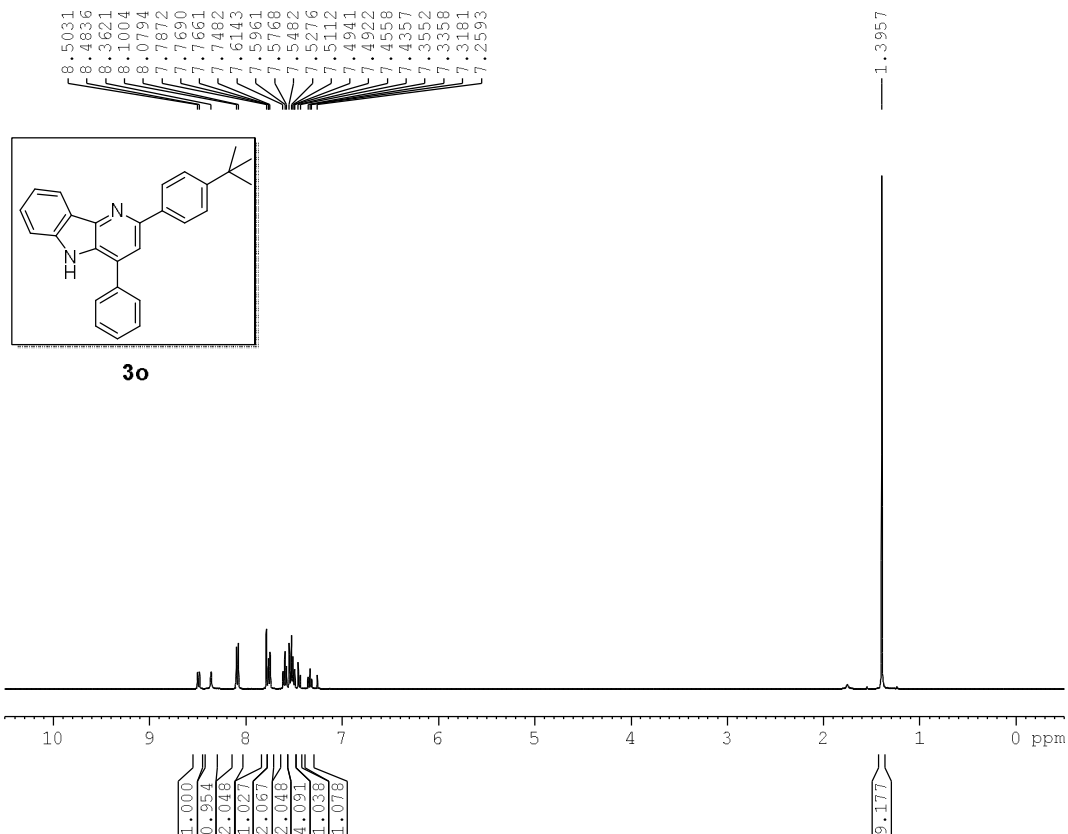

Current Data Parameters  
 NAME O(4-t-butyl chalcone)  
 EXPNO 71  
 PROCNO 1

F2 - Acquisition Parameters  
 Date\_ 20140423  
 Time 21.00  
 INSTRUM spect  
 PROBHD 5 mm PABBO BB/  
 PULPROG zg30  
 TD 32768  
 SOLVENT CDCl3  
 NS 16  
 DS 0  
 SWH 7211.539 Hz  
 FIDRES 0.220079 Hz  
 AQ 2.2719147 sec  
 RG 78.51  
 DW 69.333 usec  
 DE 10.52 usec  
 TE 297.9 K  
 D1 2.0000000 sec  
 TDO 1

==== CHANNEL f1 =====  
 SFO1 400.1324009 MHz  
 NUC1 1H  
 P1 12.80 usec  
 PLW1 15.00000000 W

F2 - Processing parameters  
 SI 16584  
 SF 400.1300098 MHz  
 WDW EM  
 SSB 0  
 LB 0 Hz  
 GB 0  
 PC 1.00

2-(4-(tert-butyl)phenyl)-4-phenyl-5-carboline

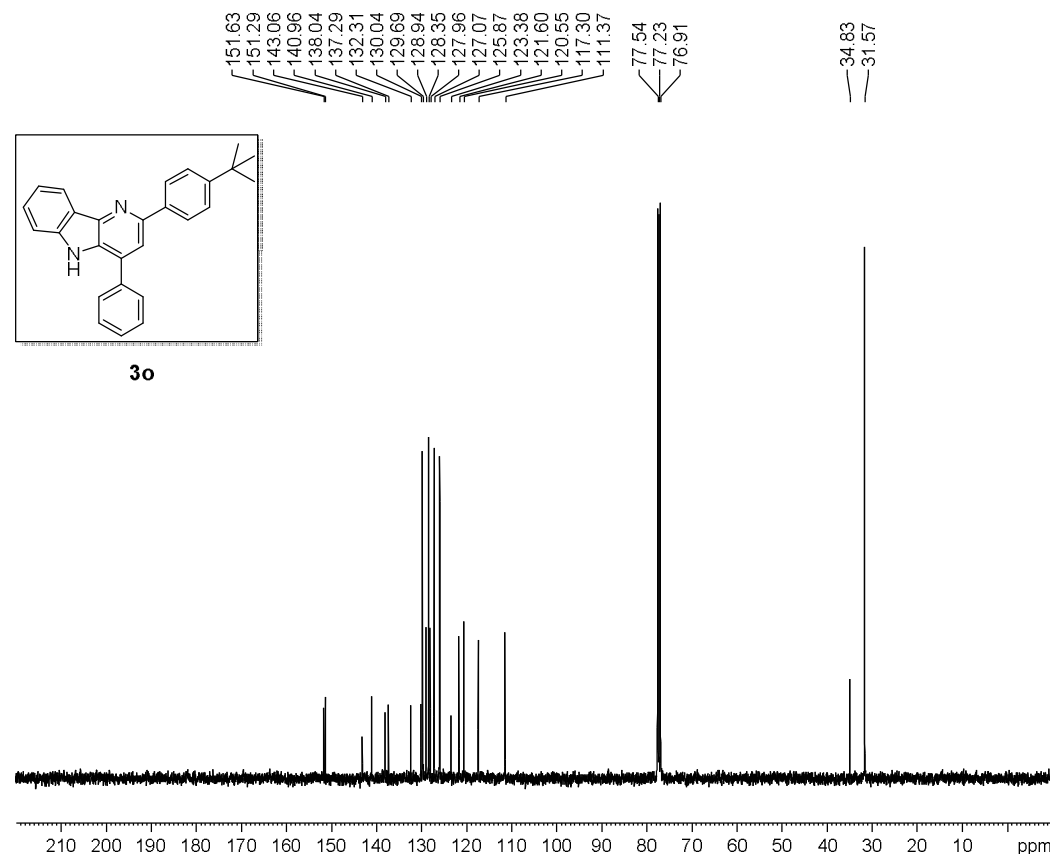

Current Data Parameters  
 NAME O(4-t-butyl chalcone)  
 EXPNO 713  
 PROCNO 1

F2 - Acquisition Parameters  
 Date\_ 20140423  
 Time 21.01  
 INSTRUM spect  
 PROBHD 5 mm PABBO BB/  
 PULPROG zgpg30  
 TD 32768  
 SOLVENT CDCl3  
 NS 267  
 DS 0  
 SWH 24038.461 Hz  
 FIDRES 0.733596 Hz  
 AQ 0.6815744 sec  
 RG 198.09  
 DW 20.900 usec  
 DE 6.50 usec  
 TE 298.0 K  
 D1 2.0000000 sec  
 D11 0.03000000 sec  
 TDO 1

==== CHANNEL f1 =====  
 SFO1 100.6233319 MHz  
 NUC1 13C  
 P1 10.00 usec  
 PLW1 46.00000000 W

==== CHANNEL f2 =====  
 SFO2 400.1316005 MHz  
 NUC2 1H  
 CPDPRG2 waltz16  
 PCPD2 90.00 usec  
 PLW2 15.00000000 W  
 PLW12 0.34252000 W  
 PLW13 0.27744001 W

F2 - Processing parameters  
 SI 32768  
 SF 100.6127503 MHz  
 WDW EM  
 SSB 0  
 LB 2.00 Hz  
 GB 0  
 PC 1.00

4-phenyl-2-(p-tolyl)-δ-carboline

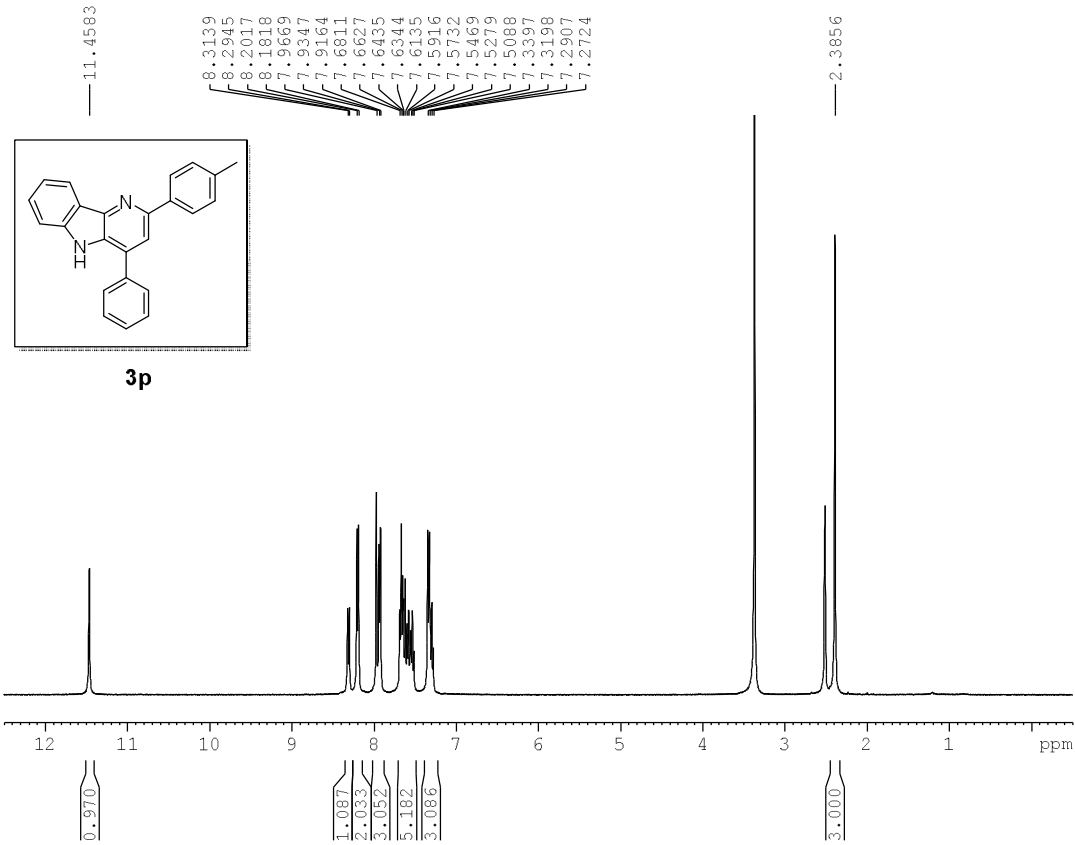

Current Data Parameters  
 NAME P(4-Me chalcone)  
 EXPNO 71  
 PROCNO 1

F2 - Acquisition Parameters  
 Date\_ 20140320  
 Time 14.32  
 INSTRUM spect  
 PROBHD 5 mm PABBO BB/  
 PULPROG zg30  
 TD 32768  
 SOLVENT DMSO  
 NS 16  
 DS 0  
 SWH 7211.539 Hz  
 FIDRES 0.220079 Hz  
 AQ 2.2719147 sec  
 RG 78.51  
 DW 69.333 usec  
 DE 10.62 usec  
 TE 298.0 K  
 D1 2.0000000 sec  
 TDO 1

==== CHANNEL f1 =====  
 SFO1 400.1324008 MHz  
 NUC1 1H  
 P1 12.80 usec  
 PLW1 15.0000000 W

F2 - Processing parameters  
 SI 18584  
 SF 400.1300000 MHz  
 WDW EM  
 SSB 0  
 LB 0 Hz  
 GB 0  
 PC 1.00

4-phenyl-2-(p-tolyl)-δ-carboline

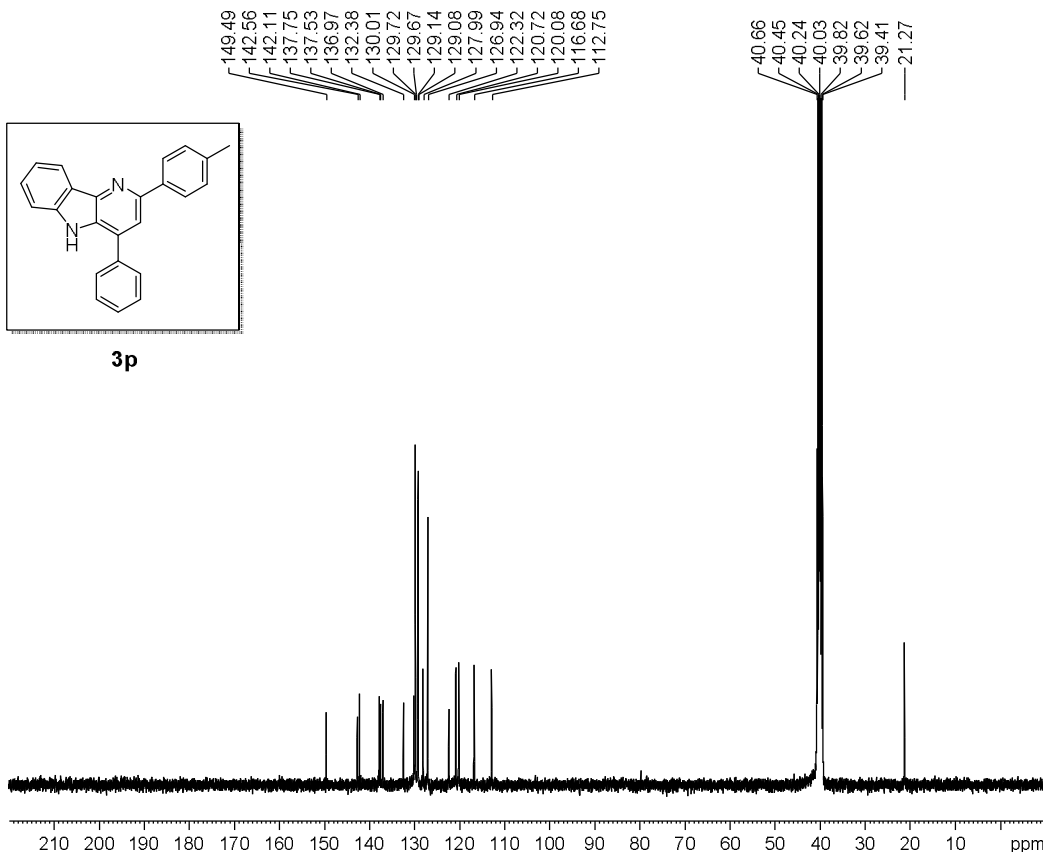

Current Data Parameters  
 NAME P(4-Me chalcone)  
 EXPNO 713  
 PROCNO 1

F2 - Acquisition Parameters  
 Date\_ 20140320  
 Time 0.56  
 INSTRUM spect  
 PROBHD 5 mm BBO BB-1H  
 PULPROG zgpg30  
 TD 32768  
 SOLVENT DMSO  
 NS 4000  
 DS 0  
 SWH 24038.461 Hz  
 FIDRES 0.733596 Hz  
 AQ 0.6815744 sec  
 RG 8192  
 DW 20.800 usec  
 DE 6.50 usec  
 TE 300.1 K  
 D1 2.0000000 sec  
 D11 0.0300000 sec  
 TDO 1

==== CHANNEL f1 =====  
 NUC1 13C  
 P1 9.40 usec  
 PL1 7.00 dB  
 SFO1 100.6233325 MHz

==== CHANNEL f2 =====  
 CPDPRG2 waltz16  
 NUC2 1H  
 PCPD2 90.00 usec  
 PL2 -2.00 dB  
 PL12 13.95 dB  
 PL13 17.00 dB  
 SFO2 400.1316005 MHz

F2 - Processing parameters  
 SI 32768  
 SF 100.6127660 MHz  
 WDW EM  
 SSB 0  
 LB 1.00 Hz  
 GB 0  
 PC 1.00

2-(naphthalen-2-yl)-4-phenyl- $\delta$ -carboline

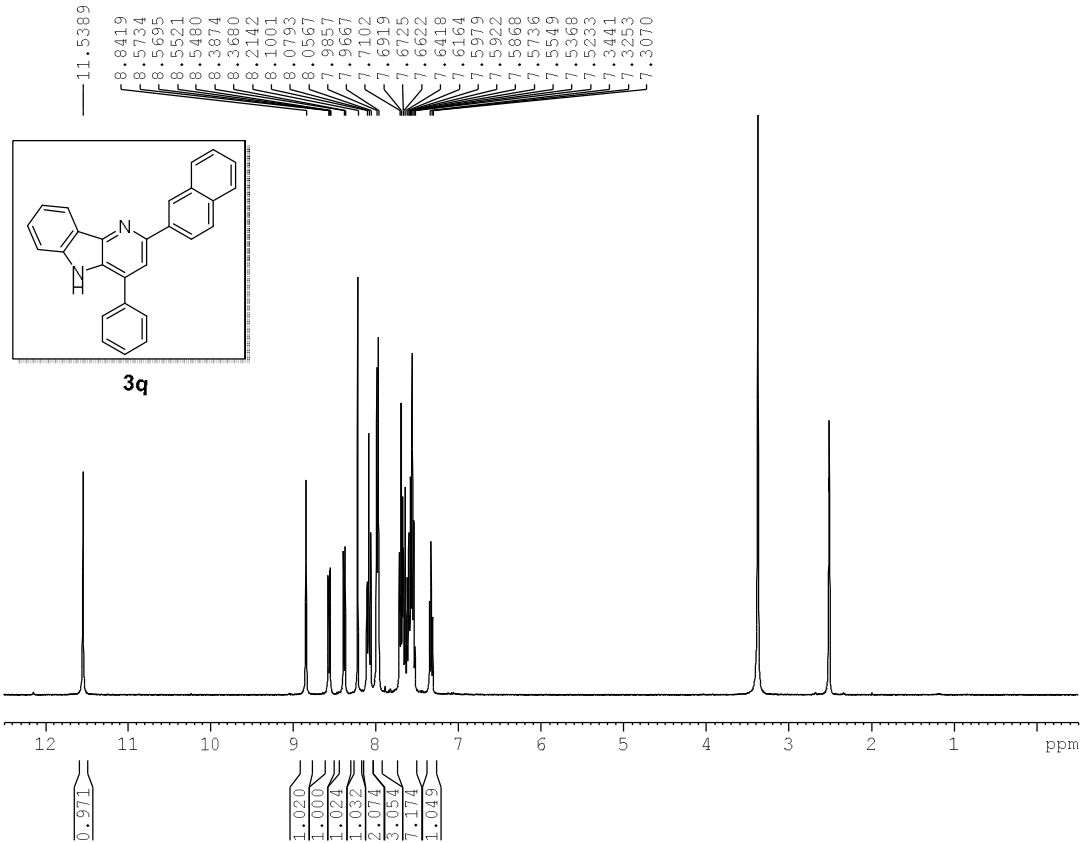

Current Data Parameters  
 NAME Q(2-naphthyl chalcone)  
 EXPNO 71  
 PROCNO 1

F2 - Acquisition Parameters  
 Date\_ 20140318  
 Time 18.53  
 INSTRUM spect  
 PROBHD 5 mm PABBO BB/  
 PULPROG zg30  
 TD 32768  
 SOLVENT DMSO  
 NS 16  
 DS 0  
 SWH 7211.539 Hz  
 FIDRES 0.220079 Hz  
 AQ 2.2719147 sec  
 RG 78.51  
 DW 69.333 usec  
 DE 10.62 usec  
 TE 298.0 K  
 D1 2.00000000 sec  
 TDO 1

==== CHANNEL f1 =====  
 SFO1 400.1324008 MHz  
 NUC1 1H  
 P1 12.80 usec  
 PLW1 15.00000000 W

F2 - Processing parameters  
 SI 18584  
 SF 400.1300000 MHz  
 WDW EM  
 SSB 0  
 LB 0 Hz  
 GB 0  
 PC 1.00

2-(naphthalen-2-yl)-4-phenyl- $\delta$ -carboline

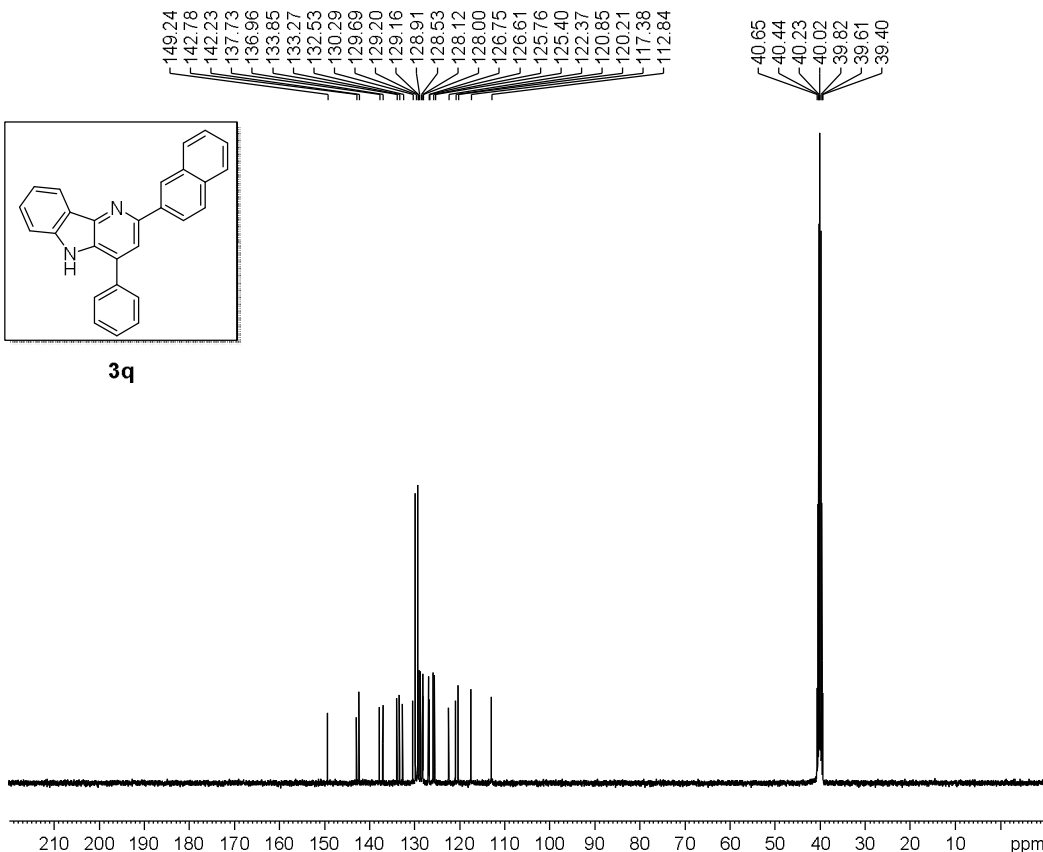

Current Data Parameters  
 NAME Q(2-naphthyl chalcone)  
 EXPNO 713  
 PROCNO 1

F2 - Acquisition Parameters  
 Date\_ 20140320  
 Time 18.11  
 INSTRUM spect  
 PROBHD 5 mm BBO BB-1H  
 PULPROG zgpg30  
 TD 32768  
 SOLVENT DMSO  
 NS 1085  
 DS 0  
 SWH 24038.461 Hz  
 FIDRES 0.733596 Hz  
 AQ 0.6815744 sec  
 RG 8192  
 DW 20.800 usec  
 DE 6.50 usec  
 TE 298.8 K  
 D1 2.00000000 sec  
 D11 0.03000000 sec  
 TDO 1

==== CHANNEL f1 =====  
 NUC1 13C  
 P1 9.40 usec  
 PL1 7.00 dB  
 SFO1 100.6233325 MHz

==== CHANNEL f2 =====  
 CPDPRG2 waltz16  
 NUC2 1H  
 PCPD2 90.00 usec  
 PL2 -2.00 dB  
 PL12 13.95 dB  
 PL13 17.00 dB  
 SFO2 400.1316005 MHz

F2 - Processing parameters  
 SI 32768  
 SF 100.6127660 MHz  
 WDW EM  
 SSB 0  
 LB 1.00 Hz  
 GB 0  
 PC 1.00

2-(4-methoxyphenyl)-4-phenyl-5-carboline

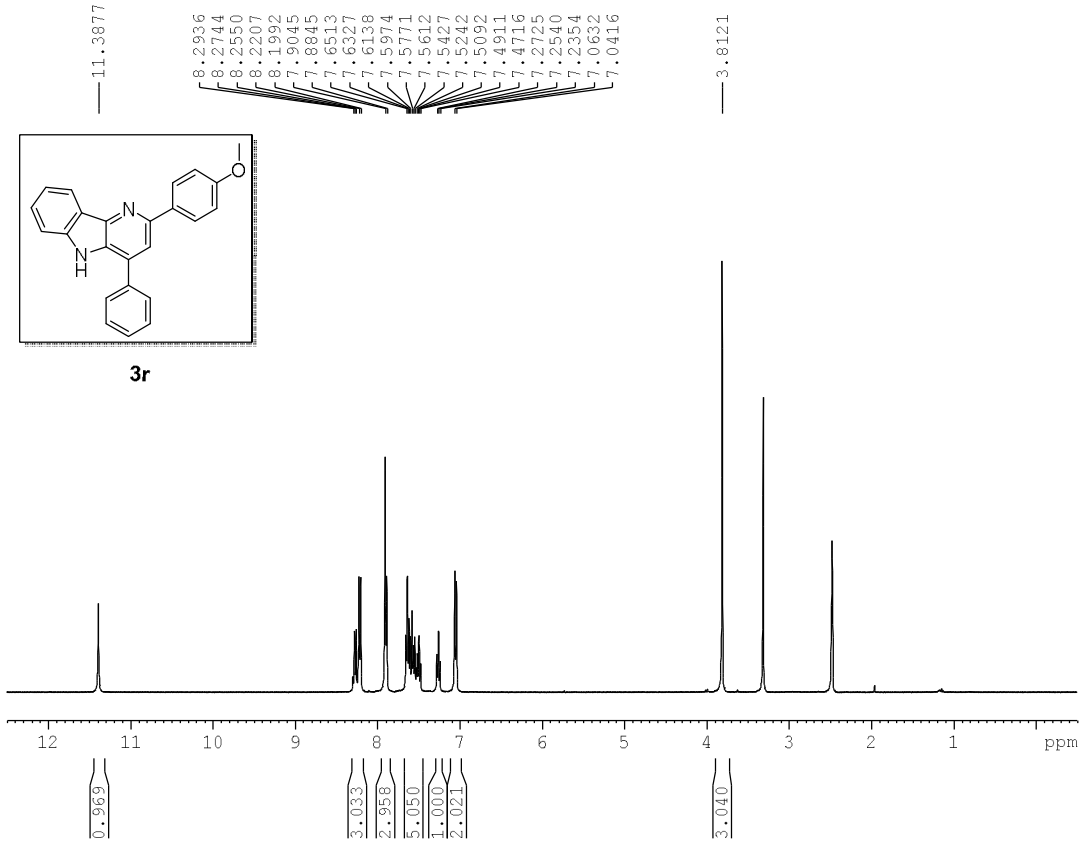

Current Data Parameters  
 NAME R(4-OMe chalcone)  
 EXPNO 71  
 PROCNO 1  
 F2 - Acquisition Parameters  
 Date\_ 20131109  
 Time 16:21  
 INSTRUM spect  
 PROBHD 5 mm BBO BB-1H  
 PULPROG zg30  
 TD 32768  
 SOLVENT DMSO  
 NS 16  
 DS 0  
 SWH 7246.377 Hz  
 FIDRES 0.221142 Hz  
 AQ 2.2609921 sec  
 RG 223.1  
 DW 69.000 usec  
 DE 6.50 usec  
 TE 300.1 K  
 D1 2.0000000 sec  
 TDO

==== CHANNEL f1 =====  
 NUC1 1H  
 P1 11.90 usec  
 PL1 3.00 dB  
 SFO1 400.1324008 MHz  
 F2 - Processing parameters  
 SI 16384  
 SF 400.1300118 MHz  
 WDW EM  
 SSB 0  
 LB 0 Hz  
 GB 0  
 PC 1.00

2-(4-methoxyphenyl)-4-phenyl-6-carboline

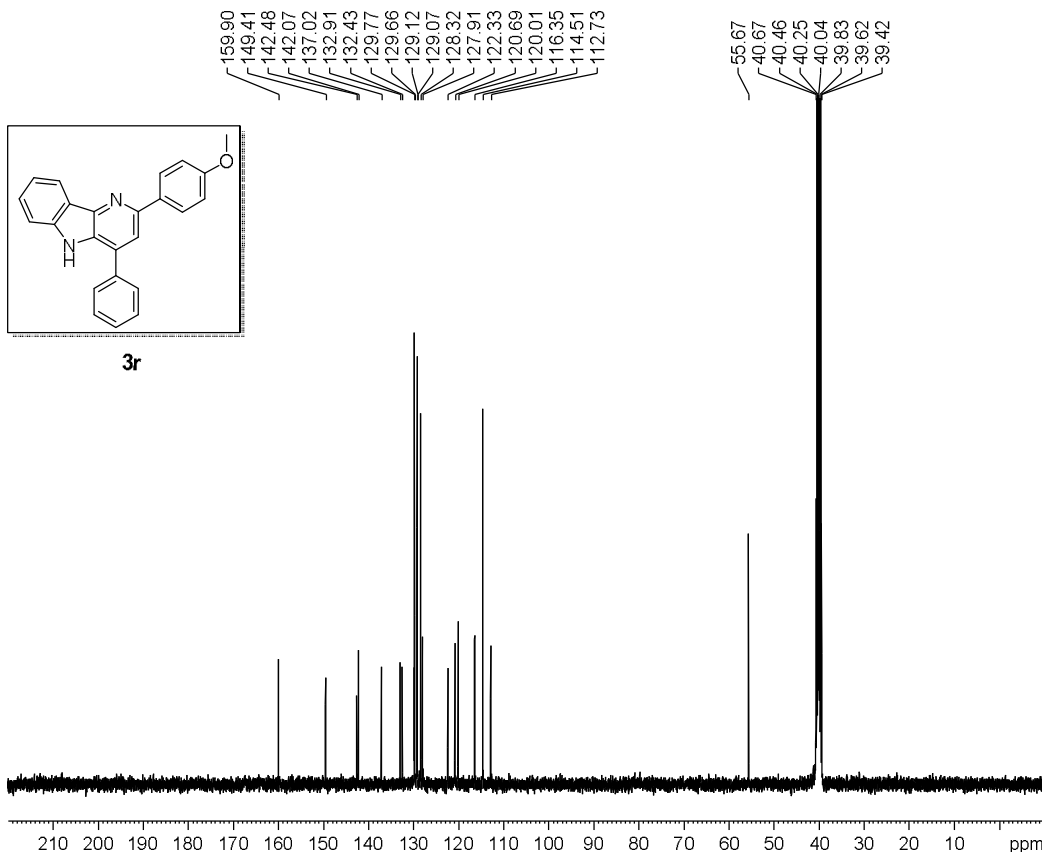

Current Data Parameters  
 NAME R(4-OMe chalcone)  
 EXPNO 713  
 PROCNO 1  
 F2 - Acquisition Parameters  
 Date\_ 20131109  
 Time 20:03  
 INSTRUM spect  
 PROBHD 5 mm BBO BB-1H  
 PULPROG zgpg30  
 TD 32768  
 SOLVENT DMSO  
 NS 952  
 DS 0  
 SWH 24038.461 Hz  
 FIDRES 0.733596 Hz  
 AQ 0.6815744 sec  
 RG 16384  
 DW 20.800 usec  
 DE 6.50 usec  
 TE 300.5 K  
 D1 2.0000000 sec  
 D11 0.0300000 sec  
 TDO 1

==== CHANNEL f1 =====  
 NUC1 13C  
 P1 10.50 usec  
 PL1 7.00 dB  
 SFO1 100.6233325 MHz  
 ==== CHANNEL f2 =====  
 CPDPRG2 waltz16  
 NUC2 1H  
 PCPD2 90.00 usec  
 PL2 -0.60 dB  
 PL12 15.00 dB  
 PL13 18.00 dB  
 SFO2 400.1316005 MHz  
 F2 - Processing parameters  
 SI 32768  
 SF 100.6127600 MHz  
 WDW EM  
 SSB 0  
 LB 1.00 Hz  
 GB 0  
 PC 1.00

8-bromo-2,4-diphenyl-5-carboline

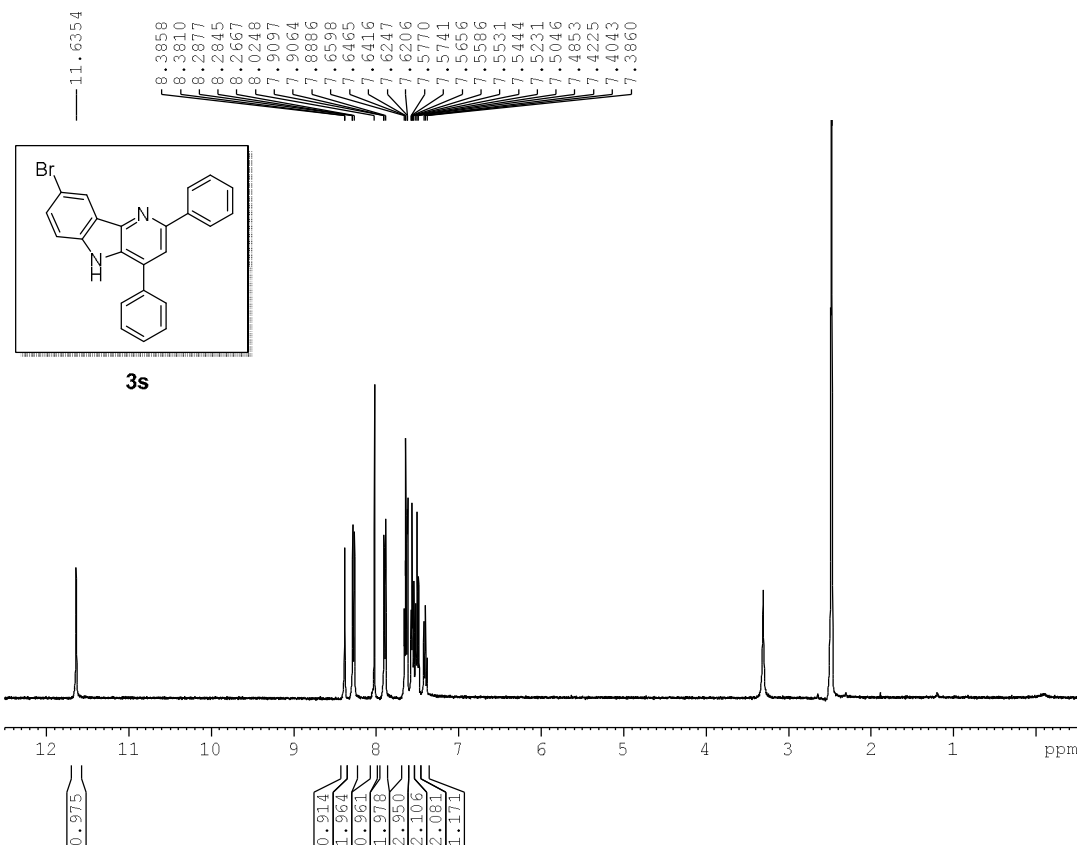

Current Data Parameters  
 NAME S(5-Br indole)  
 EXPNO 71  
 PROCNO 1

F2 - Acquisition Parameters  
 Date\_ 20140519  
 Time 21.20  
 INSTRUM spect  
 PROBHD 5 mm SEI 1H-13  
 PULPROG zg30  
 TD 32768  
 SOLVENT DMSO  
 NS 16  
 DS 0  
 SWH 7246.377 Hz  
 FIDRES 0.221142 Hz  
 AQ 2.2609921 sec  
 RG 114  
 DW 69.000 usec  
 DE 6.50 usec  
 TE 298.1 K  
 D1 2.0000000 sec  
 TDO 1

==== CHANNEL f1 =====  
 NUC1 1H  
 P1 11.90 usec  
 PL1 3.00 dB  
 SFO1 400.1324008 MHz

F2 - Processing parameters  
 SI 16384  
 SF 400.1300118 MHz  
 WDW EM  
 SSB 0  
 LB 0 Hz  
 GB 0  
 PC 1.00

8-bromo-2,4-diphenyl-5-carboline

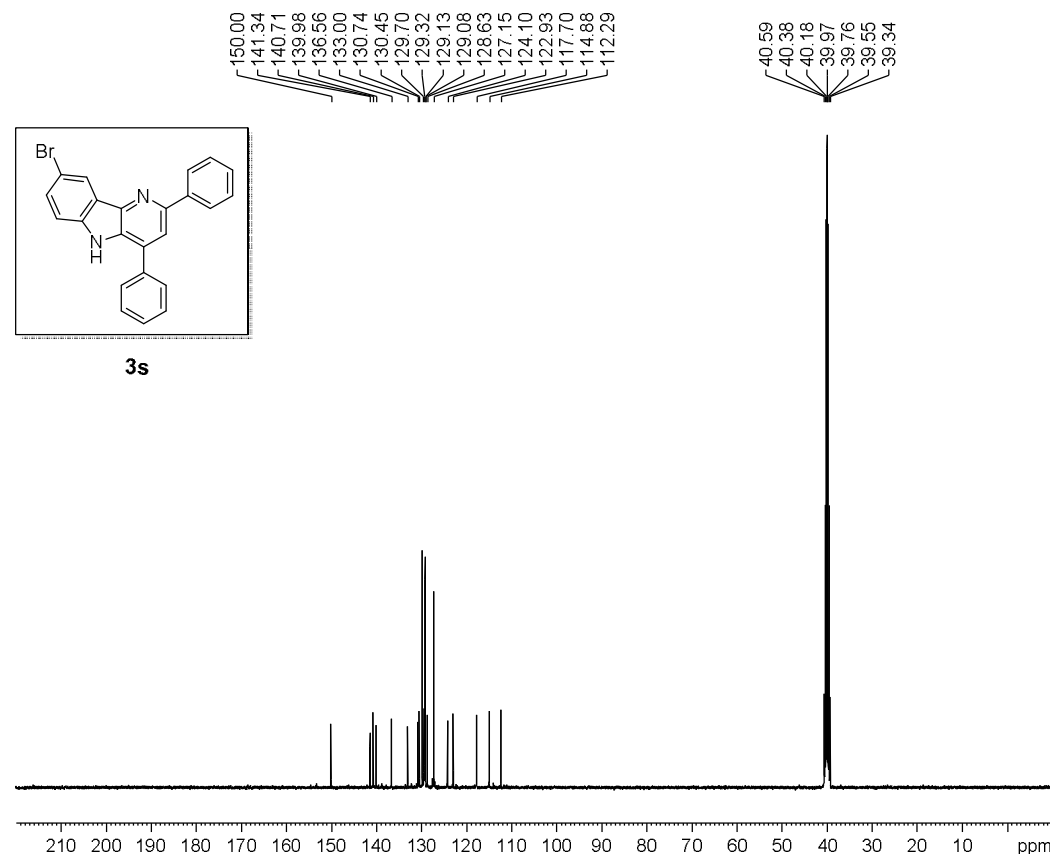

Current Data Parameters  
 NAME S(5-Br indole)  
 EXPNO 713  
 PROCNO 1

F2 - Acquisition Parameters  
 Date\_ 20140331  
 Time 3.41  
 INSTRUM spect  
 PROBHD 5 mm BBO BB-1H  
 PULPROG zgpg30  
 TD 32768  
 SOLVENT DMSO  
 NS 3000  
 DS 0  
 SWH 24038.461 Hz  
 FIDRES 0.733596 Hz  
 AQ 0.6815744 sec  
 RG 8192  
 DW 20.800 usec  
 DE 6.50 usec  
 TE 300.5 K  
 D1 2.0000000 sec  
 D11 0.03000000 sec  
 TDO 1

==== CHANNEL f1 =====  
 NUC1 13C  
 P1 9.40 usec  
 PL1 7.00 dB  
 SFO1 100.6233325 MHz

==== CHANNEL f2 =====  
 CPDPRG2 waltz16  
 NUC2 1H  
 PCPD2 90.00 usec  
 PL2 -2.00 dB  
 PL12 13.95 dB  
 PL13 17.00 dB  
 SFO2 400.1316005 MHz

F2 - Processing parameters  
 SI 32768  
 SF 100.6127660 MHz  
 WDW EM  
 SSB 0  
 LB 1.00 Hz  
 GB 0  
 PC 1.00

8-nitro-2,4-diphenyl-5-carboline

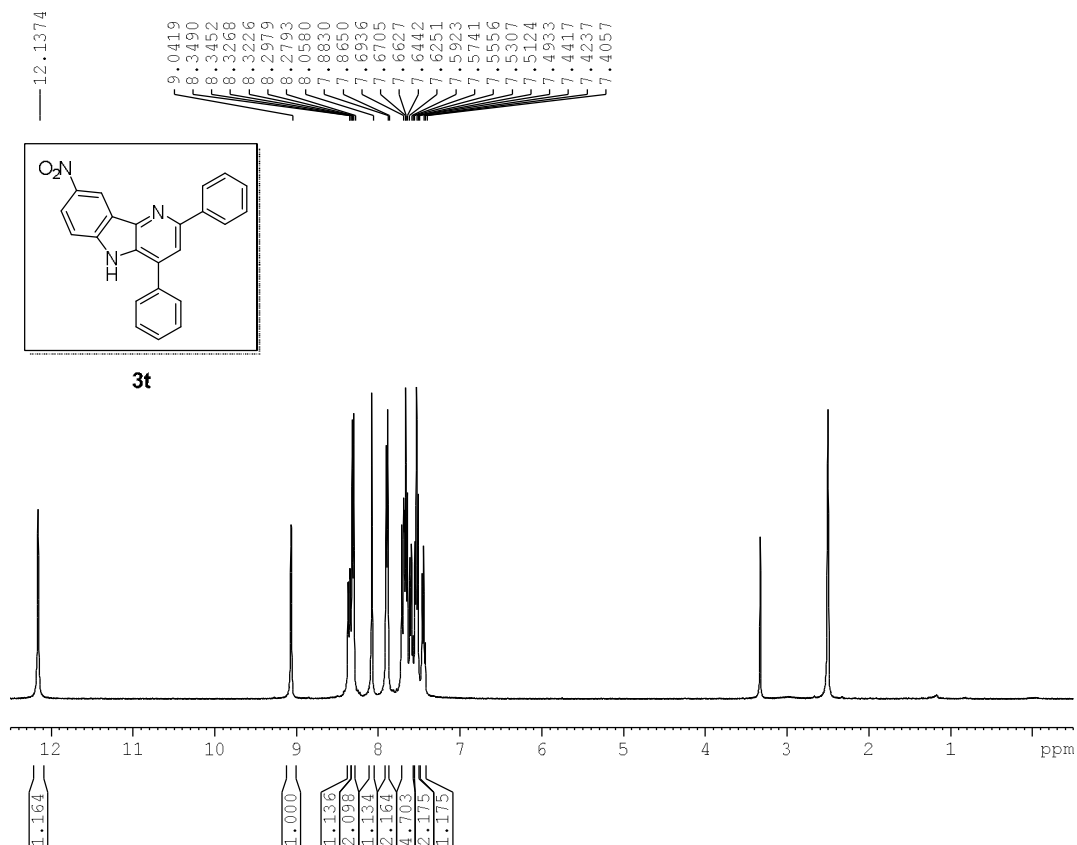

Current Data Parameters  
 NAME T(5-NO2 indole)  
 EXPNO 71  
 PROCNO 1

F2 - Acquisition Parameters  
 Date\_ 20140731  
 Time 10.35  
 INSTRUM spect  
 PROBHD 5 mm BBO BB-1H  
 PULPROG zg30  
 TD 32768  
 SOLVENT DMSO  
 NS 16  
 DS 0  
 SWH 7246.377 Hz  
 FIDRES 0.221142 Hz  
 AQ 2.2609921 sec  
 RG 114  
 DW 69.000 usec  
 DE 6.50 usec  
 TE 298.6 K  
 D1 2.0000000 sec  
 TDO 1

===== CHANNEL f1 =====  
 NUC1 1H  
 P1 15.00 usec  
 PL1 -5.85 dB  
 SFO1 400.1324008 MHz

F2 - Processing parameters  
 SI 18584  
 SF 400.1300038 MHz  
 WDW EM  
 SSB 0  
 LB 0 Hz  
 GB 0  
 PC 1.00

8-nitro-2,4-diphenyl-5-carboline

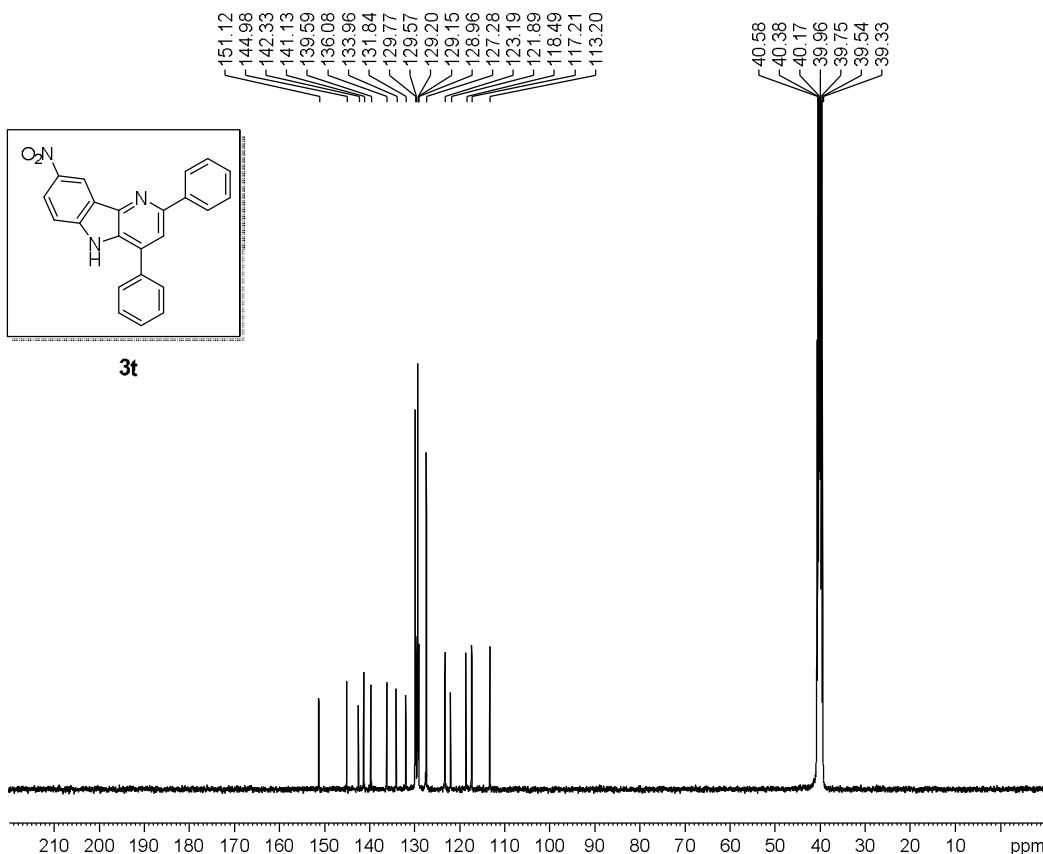

Current Data Parameters  
 NAME T(5-NO2 indole)  
 EXPNO 713  
 PROCNO 1

F2 - Acquisition Parameters  
 Date\_ 20140827  
 Time 22.31  
 INSTRUM spect  
 PROBHD 5 mm PABBO BB/  
 PULPROG zgpg30  
 TD 32768  
 SOLVENT DMSO  
 NS 8000  
 DS 0  
 SWH 24038.461 Hz  
 FIDRES 0.733596 Hz  
 AQ 0.6815744 sec  
 RG 198.09  
 DW 20.900 usec  
 DE 6.50 usec  
 TE 298.5 K  
 D1 2.0000000 sec  
 D11 0.0300000 sec  
 TDO 1

===== CHANNEL f1 =====  
 SFO1 100.6233319 MHz  
 NUC1 13C  
 P1 10.00 usec  
 PLW1 46.0000000 W

===== CHANNEL f2 =====  
 SFO2 400.1316005 MHz  
 NUC2 1H  
 CPDPRG2 waltz16  
 PCPD2 90.00 usec  
 PLW2 15.0000000 W  
 PLW12 0.34252000 W  
 PLW13 0.27744001 W

F2 - Processing parameters  
 SI 32768  
 SF 100.6127685 MHz  
 WDW EM  
 SSB 0  
 LB 2.00 Hz  
 GB 0  
 PC 1.00

8-methoxy-2,4-diphenyl- $\delta$ -carboline

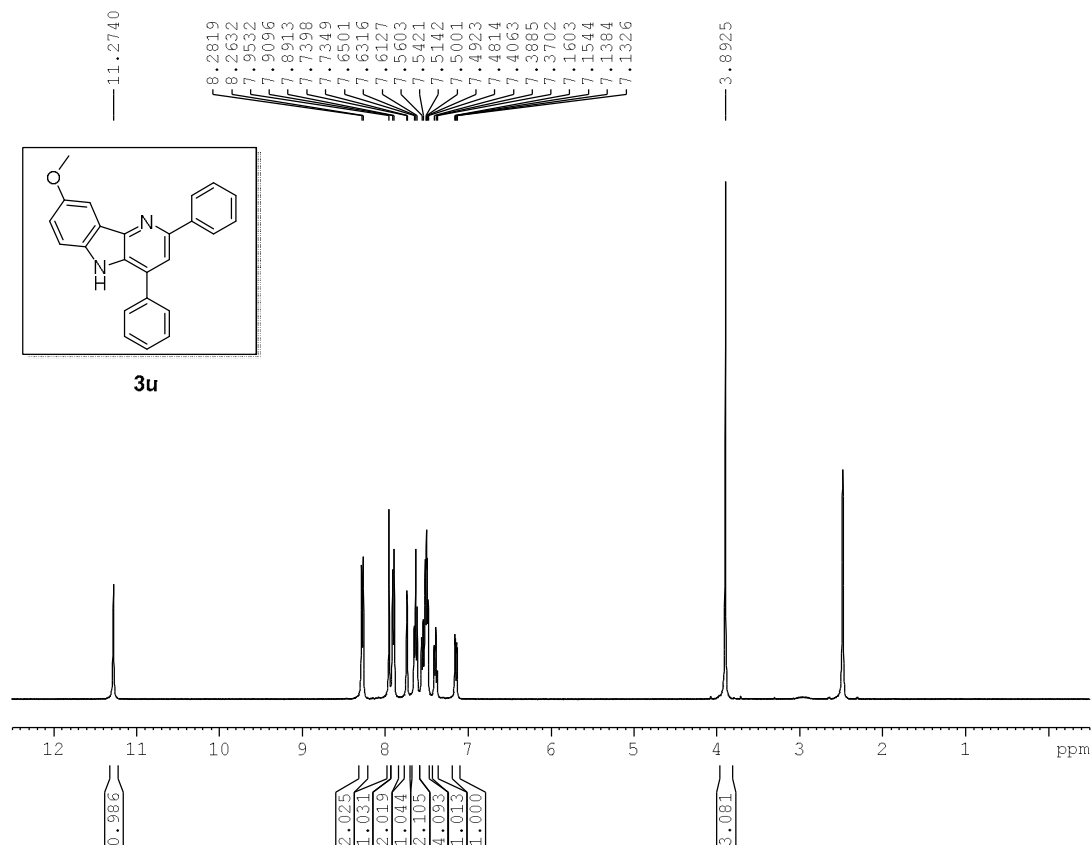

Current Data Parameters  
 NAME U(5-OMe indole)  
 EXPNO 71  
 PROCNO 1

F2 - Acquisition Parameters  
 Date\_ 20140320  
 Time 20:58  
 INSTRUM spect  
 PROBHD 5 mm BBO BB-1H  
 PULPROG zg30  
 TD 32768  
 SOLVENT DMSO  
 NS 16  
 DS 0  
 SWH 7246.377 Hz  
 FIDRES 0.221142 Hz  
 AQ 2.2609921 sec  
 RG 181  
 DW 69.000 usec  
 DE 6.50 usec  
 TE 298.7 K  
 D1 2.0000000 sec  
 TDO 1

===== CHANNEL f1 =====  
 NUC1 1H  
 P1 14.35 usec  
 PL1 -2.00 dB  
 SFO1 400.1324008 MHz

F2 - Processing parameters  
 SI 16384  
 SF 400.1300118 MHz  
 WDW EM  
 SSB 0  
 LB 0 Hz  
 GB 0  
 PC 1.00

8-methoxy-2,4-diphenyl- $\delta$ -carboline

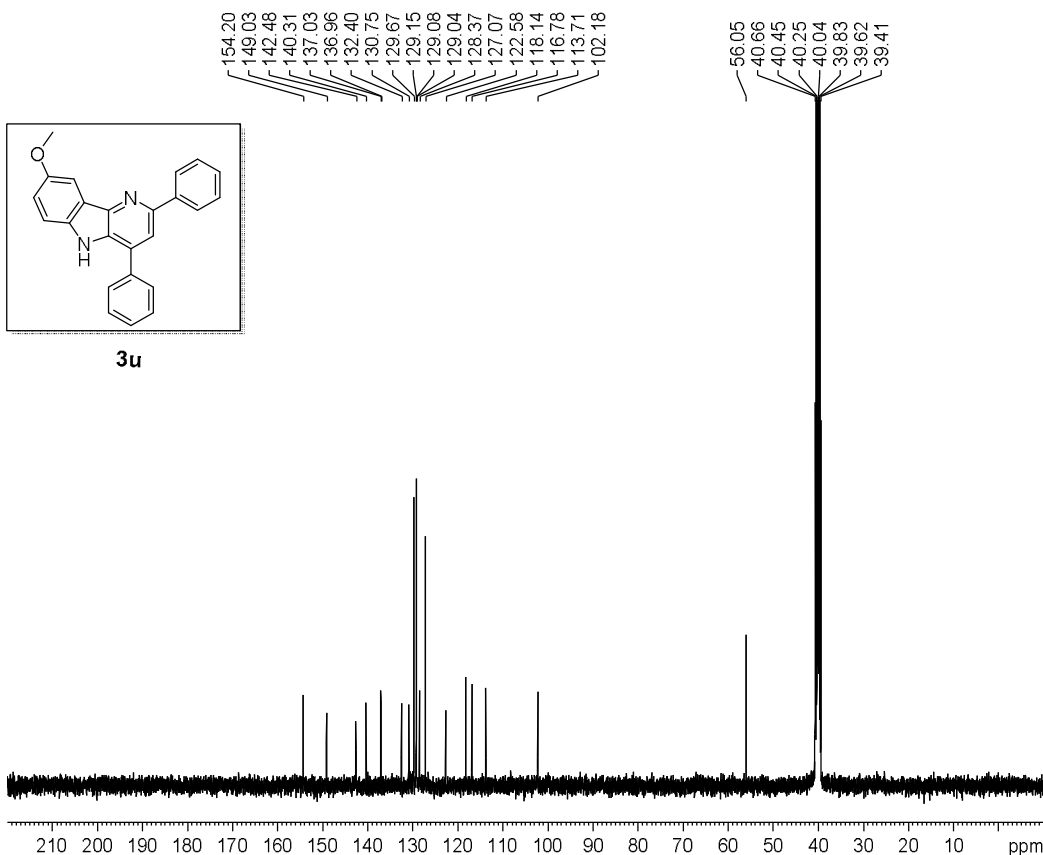

Current Data Parameters  
 NAME U(5-OMe indole)  
 EXPNO 713  
 PROCNO 1

F2 - Acquisition Parameters  
 Date\_ 20140321  
 Time 0:54  
 INSTRUM spect  
 PROBHD 5 mm BBO BB-1H  
 PULPROG zgpg30  
 TD 32768  
 SOLVENT DMSO  
 NS 1500  
 DS 0  
 SWH 24038.461 Hz  
 FIDRES 0.733596 Hz  
 AQ 0.6815744 sec  
 RG 16384  
 DW 20.800 usec  
 DE 6.50 usec  
 TE 298.8 K  
 D1 2.0000000 sec  
 D11 0.0300000 sec  
 TDO 1

===== CHANNEL f1 =====  
 NUC1 13C  
 P1 9.40 usec  
 PL1 7.00 dB  
 SFO1 100.6233325 MHz

===== CHANNEL f2 =====  
 CPDPRG2 waltz16  
 NUC2 1H  
 PCPD2 90.00 usec  
 PL2 -2.00 dB  
 PL12 13.95 dB  
 PL13 17.00 dB  
 SFO2 400.1316005 MHz

F2 - Processing parameters  
 SI 32768  
 SF 100.6127660 MHz  
 WDW EM  
 SSB 0  
 LB 1.00 Hz  
 GB 0  
 PC 1.00

(1Z,2Z)-3-(1H-indol-3-yl)-1,3-diphenylprop-2-en-1-one O-acetyl oxime

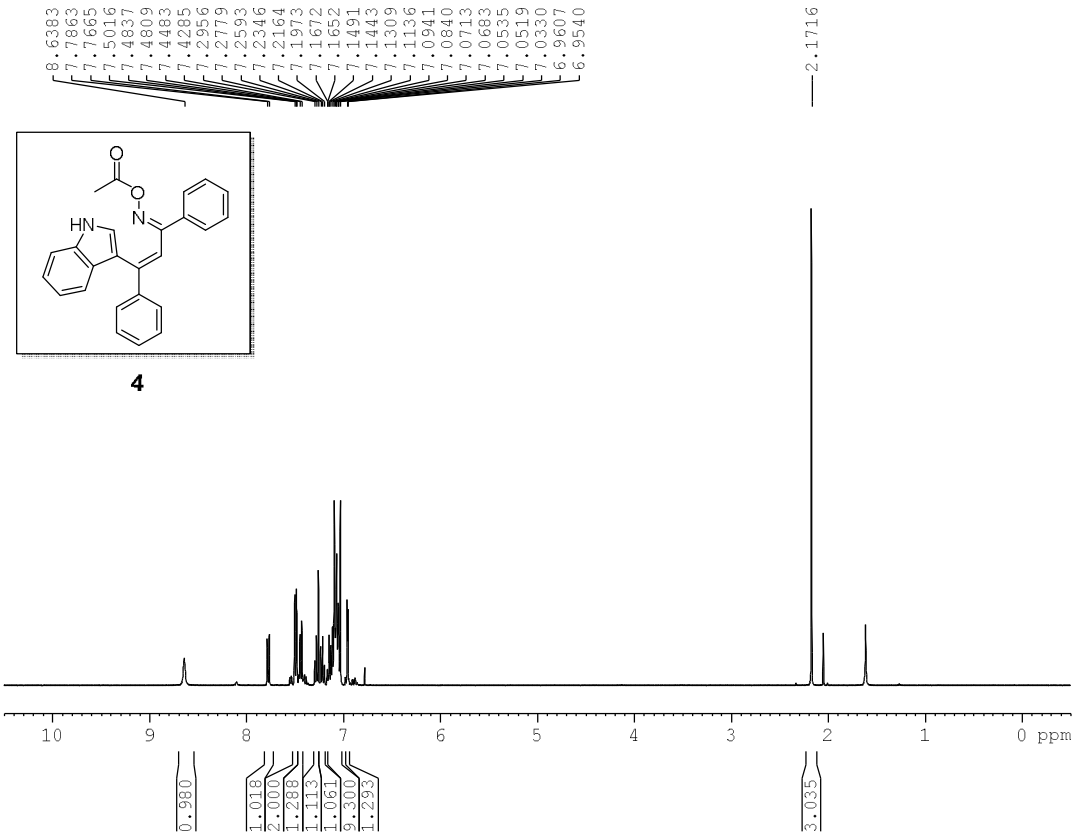

Current Data Parameters  
NAME intermediate  
EXPNO 3  
PROCNO 1

F2 - Acquisition Parameters  
Date\_ 20161104  
Time 18.54  
INSTRUM spect  
PROBHD 5 mm PABBO BB/  
PULPROG zg30  
TD 32768  
SOLVENT CDCl3  
NS 16  
DS 0  
SWH 7211.539 Hz  
FIDRES 0.220079 Hz  
AQ 2.2719147 sec  
RG 4.01  
DW 69.333 usec  
DE 10.50 usec  
TE 298.2 K  
D1 2.0000000 sec  
TDO

==== CHANNEL f1 =====  
SFO1 400.1324009 MHz  
NUC1 1H  
P1 12.90 usec  
PLW1 15.00000000 W

F2 - Processing parameters  
SI 16384  
SF 400.1300104 MHz  
EM  
WDW 0  
SSB 0  
LB 0 Hz  
GB 0  
PC 1.00

(1Z,2Z)-3-(1H-indol-3-yl)-1,3-diphenylprop-2-en-1-one O-acetyl oxime

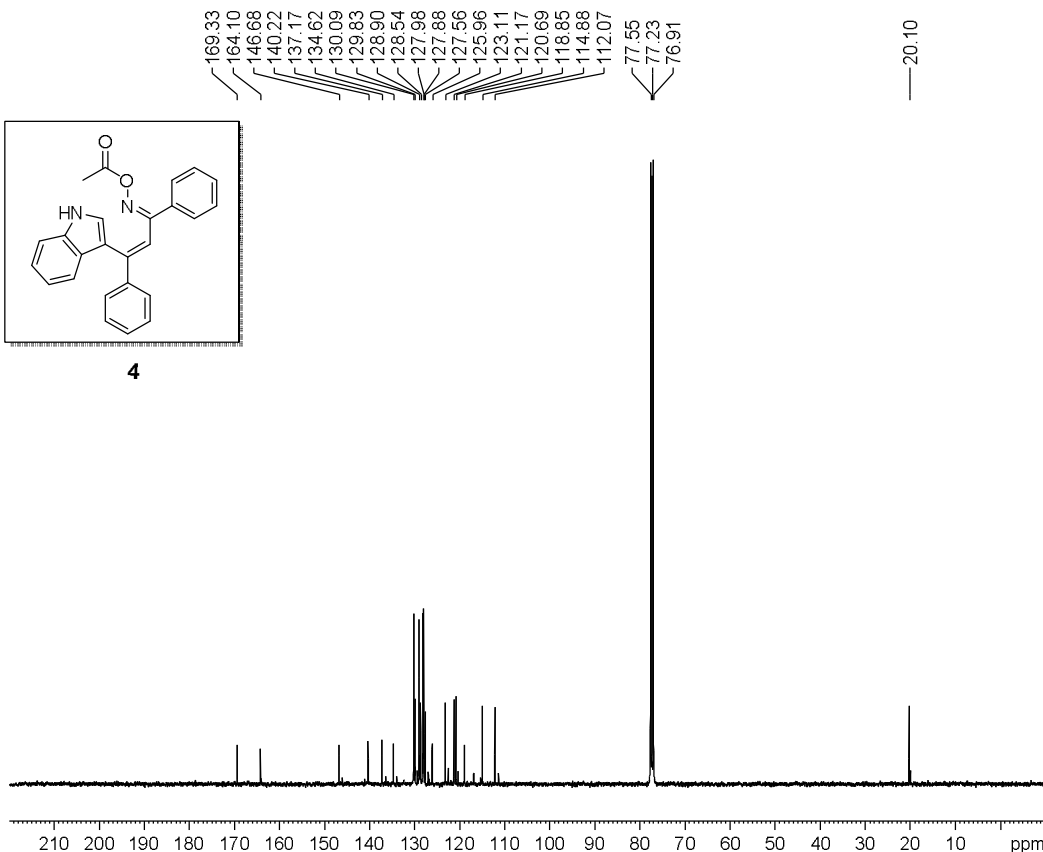

Current Data Parameters  
NAME 20161105N  
EXPNO 4  
PROCNO 1

F2 - Acquisition Parameters  
Date\_ 20161105  
Time 16.17  
INSTRUM spect  
PROBHD 5 mm PABBO BB/  
PULPROG zgpg30  
TD 32768  
SOLVENT CDCl3  
NS 1479  
DS 0  
SWH 24038.461 Hz  
FIDRES 0.733596 Hz  
AQ 0.6815744 sec  
RG 198.09  
DW 20.900 usec  
DE 6.50 usec  
TE 298.2 K  
D1 2.0000000 sec  
D11 0.03000000 sec  
TDO 1

==== CHANNEL f1 =====  
SFO1 100.6228298 MHz  
NUC1 13C  
P1 10.00 usec  
PLW1 47.50000000 W

==== CHANNEL f2 =====  
SFO2 400.1316005 MHz  
NUC2 1H  
CPDPRG2 waltz16  
PCPD2 90.00 usec  
PLW2 15.00000000 W  
PLW12 0.33750001 W  
PLW13 0.27338001 W

F2 - Processing parameters  
SI 32768  
SF 100.6127496 MHz  
EM  
WDW 0  
SSB 0  
LB 2.00 Hz  
GB 0  
PC 1.00
